# Supplementary material
Source: MDPI journal article supplement (https://www.mdpi.com/2073-4395/13/4/1053)
Supplement: s1 [file s1]

Archive with 2 entries (2 files):
- Supplementary Figures.pdf
- Supplementary Tables.xlsx
