# Supplementary material
Source: MDPI journal article supplement (https://www.mdpi.com/2073-4395/13/4/1053)
Supplement: s1 [file s1 › Supplementary Tables.xlsx]

## Sheet: Table S1
	Table S2: Information for the 193 Brassica juncea accessions used in this study
	Sample ID	Accession	Geography	Group	Seed color
	J108	Toudaoshui No.1	China,Yunnan	G1	Brown
	J141	Ziyinger Rape	China,Yunnan	G1	Brown
	J194	Quxi White Fllower Juncea	China,Yunnan	G1	Brown
	J195	Quxi Gaojiao Rape	China,Yunnan	G1	Brown
	J196	Quxi White Fllower Rape	China,Yunnan	G1	Brown
	J198	Songlin Dagen Rape	China,Yunnan	G1	Brown
	J200	Shizong Yellow Rape	China,Yunnan	G1	Brown
	J204	Yanxing Falong xiang Yellow Rape	China,Yunnan	G1	Brown
	J230	Mile Xishan Yellow Thin Rape	China,Yunnan	G1	Brown
	J236	Jianshui Puxiongqu Rape	China,Yunnan	G1	Brown
	J38	Wuding Laoshuiba Rape	China,Yunnan	G1	Brown
	J134	Qujing Rape	China,Yunnan	G1	Brown
	J181	Songming Yellow Rape	China,Yunnan	G1	Brown
	J191	PX24	China,Yunnan	G1	Brown
	J197	Quxi Wangke Juncea	China,Yunnan	G1	Brown
	J201	Dayao Tall Rape	China,Yunnan	G1	Brown
	J203	Yanxing Guona xiang Yellow Rape	China,Yunnan	G1	Brown
	J206	Chengong Gaojiao Spicy Rape	China,Yunnan	G1	Brown
	J208	Yaoan Yellow Rape	China,Yunnan	G1	Brown
	J209	Yiliang Gaojiao Rape	China,Yunnan	G1	Brown
	J212	Mengzi Gaojiao Yellow Rape	China,Yunnan	G1	Brown
	J214	Weixi Benchang Rape	China,Yunnan	G1	Brown
	J215	Yongping Yanbei Mountain village Yellow Rape	China,Yunnan	G1	Brown
	J228	Mile Xishanyiqu Yellow Rape	China,Yunnan	G1	Brown
	J239	Mouding Yunlong Yellow Rape	China,Yunnan	G1	Brown
	J240	Zhanyi Blacke Rape	China,Yunnan	G1	Brown
	J187	Yongchuan huangqingcai	China,Chongqing	G1	Brown
	J73	Aike Yellow Rape	China,Yunnan	G1	Brown
	J186	Nanchong Rape	China,Sichuan	G1	Brown
	J162	Guiding Tall Rape	China,Guizhou	G1	Brown
	J205	Chengong Yellow Rape	China,Yunnan	G2	Yellow
	J165	Cengong Bitter Rape	China,Yunnan	G2	Yellow
	J176	Jiangchuan Taitouying Zhongke Rape	China,Yunnan	G2	Yellow
	J193	Quxi Aike Juncea	China,Yunnan	G2	Yellow
	J213	Mengzi Chuchong Black Rape	China,Yunnan	G2	Yellow
	J219	Fumin Black Rape	China,Yunnan	G2	Yellow
	J323	PX36	China,Yunnan	G2	Yellow
	J39	Wuding Aijiao Yellow Rape	China,Yunnan	G2	Yellow
	J42	Huaping Big Rape	China,Yunnan	G2	Yellow
	J218	Fumin Gaojiao Yellow Rape	China,Yunnan	G2	Yellow
	J241	Songhui	China,Yunnan	G2	Yellow
	J104	Qianfeng No.10	China,Yunnan	G2	Yellow
	J105	Baoshan No.1	China,Yunnan	G2	Yellow
	J109	Zhouyou No. 181	China,Hubei	G2	Yellow
	J116	Dengchuan Shaba Gaojiao Yellow Rape	China,Yunnan	G2	Yellow
	J118	Qiubei Yellow Rape	China,Yunnan	G2	Yellow
	J143	Yuxi Haike Yellow Rape	China,Yunnan	G2	Yellow
	J199	Songlin Black Rape	China,Yunnan	G2	Yellow
	J202	Dayao Congwan Rape	China,Yunnan	G2	Yellow
	J216	Zhenyuan Bangaoke Yellow Rape	China,Yunnan	G2	Yellow
	J217	Fumin Gaojiao Golden Rape	China,Yunnan	G2	Yellow
	J31	Xiangyun Yellow Rape	China,Yunnan	G2	Yellow
	J34	Fuyuan Zhongan Yellow Rape	China,Yunnan	G2	Yellow
	J40	Wuding Qikeshu Black Rape	China,Yunnan	G2	Yellow
	J171	Yuanmou Rape	China,Yunnan	G2	Yellow
	J113	Zhouyou No.4166	China,Hubei	G3	Yellow
	J154	Weishan Yellow Rape	China,Yunnan	G3	Yellow
	J55	PX8	China,Yunnan	G3	Yellow
	J64	PX1	China,Yunnan	G3	Yellow
	J131	Guangtong Batun Yellow Rape	China,Yunnan	G3	Yellow
	J44	Huaping Dwarf Rape	China,Yunnan	G3	Yellow
	J48	Jiangchuan Hongqiaola	China,Yunnan	G3	Yellow
	J66	PX10	China,Yunnan	G3	Yellow
	J83	PX16	China,Yunnan	G3	Yellow
	J92	PX15	China,Yunnan	G3	Yellow
	J129	Xinping gaoliangchong Yellow Rape	China,Yunnan	G3	Yellow
	J151	Kunyang Xuntou xiang Yellow Rape	China,Yunnan	G3	Yellow
	J152	Heqing Yellow Rape	China,Yunnan	G3	Yellow
	J106	Lushui No.1	China,Yunnan	G3	Yellow
	J115	Dengchuan Xihu Gaojiao Rape	China,Yunnan	G3	Yellow
	J117	Denghuan Xihu Rape	China,Yunnan	G3	Yellow
	J119	Qiubei Black Rape	China,Yunnan	G3	Yellow
	J122	Xinping Qiqu Haba xiang Yellow Rape	China,Yunnan	G3	Yellow
	J179	Daguan Niuwei Gaojiao Rape	China,Yunnan	G3	Yellow
	J185	Luzhou Gloden Rape	China,Sichuan	G3	Yellow
	J89	PX20	China,Yunnan	G3	Yellow
	J99	Wenshan Rape	China,Yunnan	G3	Yellow
	J101	Huize Huangla	China,Yunnan	G3	Yellow
	J102	Qianfeng No. 7	China,Yunnan	G3	Yellow
	J103	Qianfeng No. 8	China,Yunnan	G3	Yellow
	J107	Chahe No.11	China,Yunnan	G3	Yellow
	J130	Guangtong Mawei Rape	China,Yunnan	G3	Yellow
	J132	Guangtong Dajiu Yellow Rape	China,Yunnan	G3	Yellow
	J136	Qujing Aike Jiela	China,Yunnan	G3	Yellow
	J140	Qujing Wangke Juncea	China,Yunnan	G3	Yellow
	J144	Yuxi Rape	China,Yunnan	G3	Yellow
	J146	Qilu Gaoke	China,Yunnan	G3	Yellow
	J156	Yongsheng When xiang Rape	China,Yunnan	G3	Yellow
	J157	Panxi Dazhai Rape	China,Yunnan	G3	Yellow
	J158	Yongshan Yellow Rape	China,Yunnan	G3	Yellow
	J159	Gaojiao Rape	China,Yunnan	G3	Yellow
	J160	Qingzheng Local Yellow Rape	China,Yunnan	G3	Yellow
	J161	Zijing Tall Rape	China,Yunnan	G3	Yellow
	J172	Jiangchuan Zhongke Maweilian	China,Yunnan	G3	Yellow
	J174	Jiangchuan Aijiao Yellow Rape	China,Yunnan	G3	Yellow
	J178	Lunan Chengguan Yellow Rape	China,Yunnan	G3	Yellow
	J184	Navagold-8	India	G3	Yellow
	J222	Huaning Banaijiao Rape	China,Yunnan	G3	Yellow
	J226	Chengjiang Gaoke Yellow Rape	China,Yunnan	G3	Yellow
	J27	Yangxi xiang Yellow Rape	China,Yunnan	G3	Yellow
	J29	Pengpu xiang Tall Rape	China,Yunnan	G3	Yellow
	J45	Malipo Gaojiao Red Rape	China,Yunnan	G3	Yellow
	J50	Wulong Aike	China,Yunnan	G3	Yellow
	J74	Waangke Yellow Rape	China,Yunnan	G3	Yellow
	J79	PX12	China,Yunnan	G3	Yellow
	J81	PX13	China,Yunnan	G3	Yellow
	J86	PX17	China,Yunnan	G3	Yellow
	J87	PX18	China,Yunnan	G3	Yellow
	J91	PX21	China,Yunnan	G3	Yellow
	J147	Qilu Xiaxi xiang Gaojiao Yellow Rape	China,Yunnan	G3	Yellow
	J125	Xinping Dazai xiang Yellow Juncea	China,Yunnan	G4	Yellow
	J13	PX3	China,Yunnan	G4	Yellow
	J244	Nanhua Yellow Rape	China,Yunnan	G4	Yellow
	J245	Ershan Yellow Rape	China,Yunnan	G4	Yellow
	J246	Xiangyun Yellow Rape	China,Yunnan	G4	Yellow
	J251	Huangping Bitter Rape	China,Guizhou	G4	Yellow
	J252	Shuicheng Rape	China,Guizhou	G4	Yellow
	J253	Xiuwen Mawei Rape	China,Guizhou	G4	Yellow
	J256	Hongzhi Red Rape	China,Guizhou	G4	Yellow
	J266	Suiyang Maweisi Rape	China,Guizhou	G4	Yellow
	J269	Chuan Rape	China, Sichuan	G4	Yellow
	J271	Xishui Maweisi Rape	China,Guizhou	G4	Yellow
	J272	Qianxi Big Yellow Rape	China,Guizhou	G4	Yellow
	J287	Navagold-1	India	G4	Yellow
	J310	PX30	China,Yunnan	G4	Yellow
	J314	PX31	China,Yunnan	G4	Yellow
	J317	PX33	China,Yunnan	G4	Yellow
	J257	Kaiyang Bitter Rape	China,Guizhou	G4	Yellow
	J289	Jianyang Mawei	China,Sichuan	G4	Yellow
	J292	Jieyou No.2	China,Yunnan	G4	Yellow
	J299	PX26	China,Yunnan	G4	Yellow
	J308	PX29	China,Yunnan	G4	Yellow
	J318	PX34	China,Yunnan	G4	Yellow
	J319	PX35	China,Yunnan	G4	Yellow
	J32	Fuyuan Yellow Rape	China,Yunnan	G4	Yellow
	J259	Zunyi Tall Rape	China,Guizhou	G4	Yellow
	J264	Suiyang Tall Rape	China,Guizhou	G4	Yellow
	J265	Zhenyuan Bitter Rape	China,Guizhou	G4	Yellow
	J267	Sichuan Tall Rape	China,Sichuan	G4	Yellow
	J274	Shanxi Juncea	China, Shanxi	G4	Yellow
	J276	Zem-1	India	G4	Yellow
	J277	T-59	India	G4	Yellow
	J291	Jieyou No. 1	China,Yunnan	G4	Yellow
	J282	RIM-514	India	G4	Yellow
	J121	Qilu Dwarf Yellow Rape	China,Yunnan	G4	Yellow
	J262	Bijie Tall Rape	China,Guizhou	G4	Yellow
	J100	Wenshan Juncea	China,Yunnan	-	Brown
	J11	PX2	China,Yunnan	-	Brown
	J114	Xinyou 8	China, Xinjiang	-	Brown
	J120	Tonghai luoshuidong Gaoke Yellow rape	China,Yunnan	-	Brown
	J127	Xinping Haba Xiang Juncea	China,Yunnan	-	Brown
	J133	Guangtong Xianfengshe Yellow Rape	China,Yunnan	-	Brown
	J137	Qujing Yellow Flower Gaojiao	China,Yunnan	-	Brown
	J138	Qujing Xiqi Yellow Flower Gaojiao	China,Yunnan	-	Brown
	J14	PX4	China,Yunnan	-	Yellow
	J145	Lufeng Golden Rape	China,Yunnan	-	Brown
	J149	Kunyang Rape	China,Yunnan	-	Yellow
	J153	Kunyang Zhujiaying Red Rape	China,Yunnan	-	Brown
	J155	Weishan Juncea	China,Yunnan	-	Brown
	J16	PX5	China,Yunnan	-	Brown
	J166	PX22	China,Yunnan	-	Yellow
	J167	PX23	China,Yunnan	-	Brown
	J170	Yuxi Maqiao xiang Gaoke Yellow Rape	China,Yunnan	-	Brown
	J175	Jiangchuan Shangtouying	China,Yunnan	-	Yellow
	J182	Suijiang Yellow Rape	China,Yunnan	-	Brown
	J190	PX23	China,Yunnan	-	Yellow
	J211	Chuxiong Juncea	China,Yunnan	-	Brown
	J220	Fumin Aijiao Yellow Rape	China,Yunnan	-	Brown
	J223	Huaning Gaojiao Yellow Rape	China,Yunnan	-	Brown
	J227	Chengjiang Gaojiao Yellow Juncea	China,Yunnan	-	Brown
	J231	Fengyi Liyuan Rape	China,Yunnan	-	Brown
	J238	Xishelu Yellow Rape	China,Yunnan	-	Brown
	J24	PX6	China,Yunnan	-	Brown
	J258	Fenggang Rape	China,Guizhou	-	Yellow
	J275	Bolan Rape	Poland	-	Yellow
	J286	RH-781	India	-	Yellow
	J30	Pengpu xiang Gaojiao Rape	China,Yunnan	-	Brown
	J304	PX27	China,Yunnan	-	Yellow
	J305	PX28	China,Yunnan	-	Yellow
	J315	PX32	China,Yunnan	-	Yellow
	J325	PX37	China,Yunnan	-	Yellow
	J328	PX38	China,Yunnan	-	Yellow
	J35	Fuyuan Big rape	China,Yunnan	-	Brown
	J41	Shoude Zhima Rape	China,Yunnan	-	Brown
	J46	Jiangchuan Qiaolan	China,Yunnan	-	Brown
	J47	Jiangchuan Maweilian Yellow Rape	China,Yunnan	-	Yellow
	J49	Wulong Gaoke	China,Yunnan	-	Brown
	J51	Wulong Yellow Rape	China,Yunnan	-	Brown
	J52	PX7	China,Yunnan	-	Yellow
	J60	PX9	China,Yunnan	-	Brown
	J77	PX11	China,Yunnan	-	Brown
	J82	PX14	China,Yunnan	-	Brown
	J88	PX19	China,Yunnan	-	Yellow

## Sheet: Table S2
Table S2. Chromosomal distribution of SNPs and Indels in the 193 Brassica juncea accessions.
Chromosome	SNP	Indel
A01	546677	198362
A02	500749	190914
A03	486720	197707
A04	279231	110058
A05	422724	155890
A06	402585	158864
A07	380085	144476
A08	366226	144012
A09	714655	267988
A10	254698	98915
sub-A	4354350	1667186
B01	492265	175039
B02	685738	231798
B03	588938	211029
B04	503429	166821
B05	636281	223881
B06	421529	157130
B07	421926	153129
B08	747405	247075
sub-B	4497511	1565902
Total	8851861	3233088

## Sheet: Table S3
Table S3 Statistics of fixation index (FST) and nucleotide diversity (π)
Fst\π	G1	G2	G3	G4
G1	1.57×10-3
G2	0.02898	1.47×10-3
G3	0.094804	0.081018	1.58×10-3
G4	0.120158	0.108676	0.084005	1.16×10-3

## Sheet: Table S4
	Table S4: Seed coat color candiate genes within the putative selective sweeps in Brassica juncea.
Chr.	Gene_ID	Start position	End position	Length	Groups	NR_Annotation	Predicted_Name	Swissprot_Description	GO_Term	NOG	KO_Entry	KO_Description	EC	KEGG_Pathway	Pfam_description
A01	BjuA000007	25381516	25382660	426	G1/G3	unnamed protein product [Brassica rapa]	Os06g0675700	Probable alpha-glucosidase Os06g0675700 OS=Oryza sativa subsp. japonica GN=Os06g0675700 PE=1 SV=1	GO:0004553(hydrolase activity, hydrolyzing O-glycosyl compounds);GO:0005634(nucleus);GO:0009507(chloroplast)	COG1501(hydrolase, family 31)	K01187	alpha-glucosidase	EC:3.2.1.20	osa00052(Galactose metabolism);osa00500(Starch and sucrose metabolism)	A0A087HC11.1 PF01055.24;Glyco_hydro_31;
A01	BjuA000518	3868169	3869220	744	G1/G3	unnamed protein product [Brassica rapa]	At4g29530	Inorganic pyrophosphatase 3 OS=Arabidopsis thaliana GN=At4g29530 PE=2 SV=1	GO:0003824(catalytic activity);GO:0005634(nucleus);GO:0009229(thiamine diphosphate biosynthetic process);GO:0016311(dephosphorylation);GO:0016791(phosphatase activity);GO:0042131(thiamine phosphate phosphatase activity);GO:0046872(metal ion binding)	ENOG4111NAQ(Phosphatase)	K13248	pyridoxal phosphate phosphatase PHOSPHO2	EC:3.1.3.74	brp00750(Vitamin B6 metabolism)	A0A078EXJ5.1 PF06888.10;Put_Phosphatase;
A01	BjuA000519	3869607	3870192	279	G1/G3	hypothetical protein BRARA_A00777 [Brassica rapa]	LPXA	Probable acyl-[acyl-carrier-protein]--UDP-N-acetylglucosamine O-acyltransferase, mitochondrial OS=Arabidopsis thaliana GN=LPXA PE=1 SV=1	GO:0005739(mitochondrion);GO:0008610(lipid biosynthetic process);GO:0008780(acyl-[acyl-carrier-protein]-UDP-N-acetylglucosamine O-acyltransferase activity);GO:0009245(lipid A biosynthetic process);GO:0016021(integral component of membrane);GO:2001289(lipid X metabolic process)	-	NA	NA	NA	NA(NA)	-
A01	BjuA000520	3871107	3871755	561	G1/G3	unnamed protein product [Brassica rapa]	-	-	-	-	-	-	-	-	M4D3R8.1 PF00112.21;Peptidase_C1;
A01	BjuA001513	1759937	1762544	1040	G1/G3	hypothetical protein BRARA_A00298 [Brassica rapa]	At4g35335	CMP-sialic acid transporter 4 OS=Arabidopsis thaliana GN=At4g35335 PE=2 SV=1	GO:0005338(nucleotide-sugar transmembrane transporter activity);GO:0005768(endosome);GO:0005794(Golgi apparatus);GO:0005802(trans-Golgi network);GO:0005886(plasma membrane);GO:0016020(membrane)	COG0697(membrane)	NA	NA	NA	NA(NA)	A0A078C8P8.1 PF04142.13;Nuc_sug_transp;
A01	BjuA001839	25423817	25424860	1044	G1/G3	hypothetical protein BRARA_A02630 [Brassica rapa]	IPT7	Adenylate isopentenyltransferase 7, mitochondrial OS=Arabidopsis thaliana GN=IPT7 PE=2 SV=2	GO:0005524(ATP binding);GO:0005739(mitochondrion);GO:0006400(tRNA modification);GO:0009507(chloroplast);GO:0009691(cytokinin biosynthetic process);GO:0009824(AMP dimethylallyltransferase activity);GO:0009860(pollen tube growth);GO:0016765(transferase activity, transferring alkyl or aryl (other than methyl) groups);GO:0052381(tRNA dimethylallyltransferase activity);GO:0052622(ATP dimethylallyltran…	COG0324(Catalyzes the transfer of a dimethylallyl group onto the adenine at position 37 in tRNAs that read codons beginning with uridine, leading to the formation of N6-(dimethylallyl)adenosine (i(6)A) (By similarity))	K10760	adenylate dimethylallyltransferase (cytokinin synthase)	EC:2.5.1.27 2.5.1.112	bna00908(Zeatin biosynthesis)	A0A078FYB8.1 PF01715.15;IPPT;
A01	BjuA001840	25430900	25431943	1044	G1/G3	hypothetical protein BRARA_A02630 [Brassica rapa]	IPT7	Adenylate isopentenyltransferase 7, mitochondrial OS=Arabidopsis thaliana GN=IPT7 PE=2 SV=2	GO:0005524(ATP binding);GO:0005739(mitochondrion);GO:0006400(tRNA modification);GO:0009507(chloroplast);GO:0009691(cytokinin biosynthetic process);GO:0009824(AMP dimethylallyltransferase activity);GO:0009860(pollen tube growth);GO:0016765(transferase activity, transferring alkyl or aryl (other than methyl) groups);GO:0052381(tRNA dimethylallyltransferase activity);GO:0052622(ATP dimethylallyltran…	COG0324(Catalyzes the transfer of a dimethylallyl group onto the adenine at position 37 in tRNAs that read codons beginning with uridine, leading to the formation of N6-(dimethylallyl)adenosine (i(6)A) (By similarity))	K10760	adenylate dimethylallyltransferase (cytokinin synthase)	EC:2.5.1.27 2.5.1.112	bna00908(Zeatin biosynthesis)	A0A078FYB8.1 PF01715.15;IPPT;
A01	BjuA001841	25448105	25449655	1551	G1/G3	PREDICTED: uncharacterized protein LOC108845374 [Raphanus sativus]	-	-	GO:0005634(nucleus);GO:0008150(biological_process)	ENOG410Y65V(Retrotransposon protein)	NA	NA	NA	NA(NA)	R0HPQ8.1 PF14111.4;DUF4283;
A01	BjuA001842	25449877	25452966	1698	G1/G3	uncharacterized protein LOC106448012 [Brassica napus]	At1g65750	Putative ribonuclease H protein At1g65750 OS=Arabidopsis thaliana GN=At1g65750 PE=3 SV=1	-	ENOG410Y65V(Retrotransposon protein)	-	-	-	-	C5X1I6.1 PF03372.21;Exo_endo_phos;
A01	BjuA001843	25458521	25460168	951	G1/G3	PREDICTED: ribosome production factor 2 homolog [Raphanus sativus]	At3g23620	Ribosome production factor 2 homolog OS=Arabidopsis thaliana GN=At3g23620 PE=2 SV=1	GO:0005634(nucleus);GO:0005730(nucleolus);GO:0005829(cytosol)	COG5106(ribosome production factor 2 homolog)	NA	NA	NA	NA(NA)	A0A078D7M4.1 PF04427.16;Brix;
A01	BjuA002070	3849427	3850767	1341	G1/G3	PREDICTED: molybdate transporter 1 [Brassica rapa]	MOT1	Molybdate transporter 1 OS=Arabidopsis thaliana GN=MOT1 PE=1 SV=1	GO:0005739(mitochondrion);GO:0005773(vacuole);GO:0005886(plasma membrane);GO:0009507(chloroplast);GO:0012505(endomembrane system);GO:0015098(molybdate ion transmembrane transporter activity);GO:0015116(sulfate transmembrane transporter activity);GO:0015689(molybdate ion transport);GO:0016021(integral component of membrane);GO:0031966(mitochondrial membrane)	ENOG410XTGP(molybdate ion transmembrane transporter activity)	-	-	-	-	Q9SL95.1 PF16983.3;MFS_MOT1;
A01	BjuA002071	3853420	3854196	777	G1/G3	hypothetical protein BRARA_E01654 [Brassica rapa]	-	-	GO:0032502(developmental process)	ENOG410YBST(Mariner sub-class)	NA	NA	NA	NA(NA)	-
A01	BjuA003019	1690137	1692423	1131	G1/G3	PREDICTED: glycerol-3-phosphate acyltransferase 3-like [Brassica rapa]	Gpat3	Glycerol-3-phosphate acyltransferase 3 OS=Mus musculus GN=Gpat3 PE=1 SV=1	GO:0004366(glycerol-3-phosphate O-acyltransferase activity);GO:0005515(protein binding);GO:0005634(nucleus);GO:0005783(endoplasmic reticulum);GO:0005789(endoplasmic reticulum membrane);GO:0005886(plasma membrane);GO:0006072(glycerol-3-phosphate metabolic process);GO:0006633(fatty acid biosynthetic process);GO:0006651(diacylglycerol biosynthetic process);GO:0008654(phospholipid biosynthetic proces…	COG0204(Acyltransferase)	K13506	glycerol-3-phosphate O-acyltransferase 3/4	EC:2.3.1.15	brp00561(Glycerolipid metabolism);brp00564(Glycerophospholipid metabolism)	A0A087GJW5.1 PF01553.19;Acyltransferase;
A01	BjuA003020	1702077	1704894	2598	G1/G3	PREDICTED: uncharacterized protein LOC108842592 isoform X2 [Raphanus sativus]	-	-	GO:0005634(nucleus)	ENOG410YA7D(DUF630 DUF632 domains containing protein)	-	-	-	-	A0A087GJW2.1 PF04782.10;DUF632;
A01	BjuA003021	1707187	1709505	1536	G1/G3	probable serine/threonine-protein kinase At4g35230 [Brassica napus]	At4g35230	Probable serine/threonine-protein kinase At4g35230 OS=Arabidopsis thaliana GN=At4g35230 PE=1 SV=1	GO:0004672(protein kinase activity);GO:0004675(transmembrane receptor protein serine/threonine kinase activity);GO:0005515(protein binding);GO:0005524(ATP binding);GO:0005773(vacuole);GO:0005886(plasma membrane);GO:0006468(protein phosphorylation);GO:0007166(cell surface receptor signaling pathway);GO:0009506(plasmodesma);GO:0009737(response to abscisic acid);GO:0009742(brassinosteroid mediated s…	ENOG410YDRD(STYKc)	K14500	BR-signaling kinase	EC:2.7.11.1	bna04075(Plant hormone signal transduction)	D7MD28.1 PF07714.15;Pkinase_Tyr;
A01	BjuA003022	1709807	1710103	297	G1/G3	microtubule-associated protein TORTIFOLIA1-like [Brassica napus]	-	-	-	-	-	-	-	-	-
A01	BjuA003023	1713285	1713596	312	G1/G3	PREDICTED: uncharacterized protein LOC108843345 [Raphanus sativus]	-	-	-	-	-	-	-	-	-
A01	BjuA003024	1714288	1715752	822	G1/G3	PREDICTED: uncharacterized protein LOC108823957 [Raphanus sativus]	kynB	Kynurenine formamidase OS=Sphingopyxis alaskensis (strain DSM 13593 / LMG 18877 / RB2256) GN=kynB PE=3 SV=1	GO:0004061(arylformamidase activity);GO:0005783(endoplasmic reticulum);GO:0005794(Golgi apparatus);GO:0009507(chloroplast);GO:0019441(tryptophan catabolic process to kynurenine)	COG1878(Cyclase family)	-	-	-	-	A0A078IS09.1 PF04199.11;Cyclase;
A01	BjuA003025	1716183	1717593	702	G1/G3	PREDICTED: cytokinin riboside 5'-monophosphate phosphoribohydrolase LOG5-like [Raphanus sativus]	LOG5	Cytokinin riboside 5'-monophosphate phosphoribohydrolase LOG5 OS=Arabidopsis thaliana GN=LOG5 PE=1 SV=1	GO:0005634(nucleus);GO:0005829(cytosol);GO:0009691(cytokinin biosynthetic process);GO:0016787(hydrolase activity)	COG1611(decarboxylase)	NA	NA	NA	NA(NA)	D7MD33.1 PF03641.12;Lysine_decarbox;
A01	BjuA003026	1722304	1722875	384	G1/G3	PREDICTED: lysine histidine transporter-like 7 [Brassica oleracea var. oleracea]	At4g35180	Lysine histidine transporter-like 7 OS=Arabidopsis thaliana GN=At4g35180 PE=2 SV=2	GO:0003333(amino acid transmembrane transport);GO:0005886(plasma membrane);GO:0006865(amino acid transport);GO:0015171(amino acid transmembrane transporter activity);GO:0016020(membrane);GO:0016021(integral component of membrane)	COG0814(amino acid transport)	K00021	hydroxymethylglutaryl-CoA reductase (NADPH)	EC:1.1.1.34	mdm00900(Terpenoid backbone biosynthesis)	A0A0D3A1U1.1 PF01490.16;Aa_trans;
A01	BjuA003027	1726344	1728234	1443	G1/G3	lysine histidine transporter-like 7 [Brassica napus]	At4g35180	Lysine histidine transporter-like 7 OS=Arabidopsis thaliana GN=At4g35180 PE=2 SV=2	GO:0003333(amino acid transmembrane transport);GO:0005886(plasma membrane);GO:0006865(amino acid transport);GO:0015171(amino acid transmembrane transporter activity);GO:0016020(membrane);GO:0016021(integral component of membrane)	COG0814(amino acid transport)	NA	NA	NA	NA(NA)	A0A0D3A1U1.1 PF01490.16;Aa_trans;
A01	BjuA003028	1729509	1731353	1509	G1/G3	PREDICTED: DDB1- and CUL4-associated factor 8-like protein 2 isoform X1 [Brassica oleracea var. oleracea]	Dcaf8	DDB1- and CUL4-associated factor 8 OS=Mus musculus GN=Dcaf8 PE=1 SV=1	GO:0000166(nucleotide binding)	ENOG410XQZP(ddb1 and cul4 associated factor)	NA	NA	NA	NA(NA)	V4MB49.1 PF00400.30;WD40;
A01	BjuA003029	1731568	1734009	2442	G1/G3	PREDICTED: pentatricopeptide repeat-containing protein At4g35130, chloroplastic [Raphanus sativus]	PCMP-H27	Pentatricopeptide repeat-containing protein At4g35130, chloroplastic OS=Arabidopsis thaliana GN=PCMP-H27 PE=3 SV=1	GO:0008150(biological_process);GO:0008270(zinc ion binding);GO:0009507(chloroplast)	ENOG410Z7Z7(Pentatricopeptide repeat-containing protein)	NA	NA	NA	NA(NA)	M4D531.1 PF14432.4;DYW_deaminase;
A01	BjuA003030	1734220	1735368	1149	G1/G3	PREDICTED: putative F-box/kelch-repeat protein At4g35120 [Brassica rapa]	At4g35120	Putative F-box/kelch-repeat protein At4g35120 OS=Arabidopsis thaliana GN=At4g35120 PE=3 SV=1	GO:0003674(molecular_function);GO:0005634(nucleus);GO:0008150(biological_process)	ENOG4110X8D(Kelch repeat-containing F-box family protein)	-	-	-	-	A0A078IS13.1 PF01344.23;Kelch_1;
A01	BjuA003031	1739117	1739523	312	G1/G3	thiol protease aleurain-like [Brassica napus]	ALEU	Thiol protease aleurain OS=Arabidopsis thaliana GN=ALEU PE=1 SV=2	GO:0004197(cysteine-type endopeptidase activity);GO:0005576(extracellular region);GO:0005615(extracellular space);GO:0005764(lysosome);GO:0005773(vacuole);GO:0005829(cytosol);GO:0006508(proteolysis);GO:0006955(immune response);GO:0007568(aging);GO:0008234(cysteine-type peptidase activity);GO:0009723(response to ethylene);GO:0051603(proteolysis involved in cellular protein catabolic process)	COG4870(cathepsin)	NA	NA	NA	NA(NA)	A0A0D3B2G2.1 PF08246.10;Inhibitor_I29;
A01	BjuA003032	1741211	1741913	534	G1/G3	PREDICTED: adenylate kinase isoenzyme 6 homolog [Raphanus sativus]	AAK6	Adenylate kinase isoenzyme 6 homolog OS=Arabidopsis thaliana GN=AAK6 PE=1 SV=1	GO:0000166(nucleotide binding);GO:0004017(adenylate kinase activity);GO:0005524(ATP binding);GO:0005575(cellular_component);GO:0005634(nucleus);GO:0005737(cytoplasm);GO:0006979(response to oxidative stress);GO:0016301(kinase activity);GO:0016310(phosphorylation);GO:0016740(transferase activity);GO:0030490(maturation of SSU-rRNA)	COG1936(adenylate kinase activity)	K18532	adenylate kinase	EC:2.7.4.3	boe00230(Purine metabolism);boe03008(Ribosome biogenesis in eukaryotes)	A0A078C214.1 PF13238.4;AAA_18;
A01	BjuA003033	1742337	1743227	579	G1/G3	PREDICTED: uncharacterized protein LOC108844457 [Raphanus sativus]	phaJ	(R)-specific enoyl-CoA hydratase OS=Aeromonas caviae GN=phaJ PE=1 SV=1	-	COG2030(maoc domain protein dehydratase)	K18532	adenylate kinase	EC:2.7.4.3	aly00230(Purine metabolism);aly03008(Ribosome biogenesis in eukaryotes)	A0A078DHM4.1 PF01575.17;MaoC_dehydratas;
A01	BjuA003034	1743544	1744111	393	G1/G3	PREDICTED: putative L-type lectin-domain containing receptor kinase I.11 [Raphanus sativus]	LECRK111	Putative L-type lectin-domain containing receptor kinase I.11 OS=Arabidopsis thaliana GN=LECRK111 PE=3 SV=1	GO:0004674(protein serine/threonine kinase activity);GO:0005524(ATP binding);GO:0005886(plasma membrane);GO:0006468(protein phosphorylation);GO:0009506(plasmodesma);GO:0016021(integral component of membrane);GO:0016301(kinase activity);GO:0030246(carbohydrate binding)	COG0515(Serine Threonine protein kinase)	NA	NA	NA	NA(NA)	A0A078CYI9.1 PF00069.23;Pkinase;
A01	BjuA003035	1744956	1746145	1101	G1/G3	PREDICTED: uncharacterized protein LOC106322790 [Brassica oleracea var. oleracea]	-	-	GO:0003682(chromatin binding);GO:0005634(nucleus);GO:0007064(mitotic sister chromatid cohesion);GO:0010468(regulation of gene expression);GO:0071169(establishment of protein localization to chromatin);GO:0080167(response to karrikin)	ENOG411054D(Arabidopsis phospholipase-like protein (PEARLI 4))	K12868	pre-mRNA-splicing factor SYF2	-	tcc03040(Spliceosome)	A0A078C228.1 PF05278.10;PEARLI-4;
A01	BjuA003036	1748159	1749435	843	G1/G3	PREDICTED: aquaporin PIP2-7 [Brassica oleracea var. oleracea]	PIP2-7	Aquaporin PIP2-7 OS=Arabidopsis thaliana GN=PIP2-7 PE=1 SV=2	GO:0003729(mRNA binding);GO:0005515(protein binding);GO:0005634(nucleus);GO:0005773(vacuole);GO:0005886(plasma membrane);GO:0005887(integral component of plasma membrane);GO:0006810(transport);GO:0006833(water transport);GO:0009506(plasmodesma);GO:0009737(response to abscisic acid);GO:0015250(water channel activity);GO:0016020(membrane);GO:0034220(ion transmembrane transport);GO:0046658(anchored …	COG0580(Channel that permits osmotically driven movement of water in both directions. It is involved in the osmoregulation and in the maintenance of cell turgor during volume expansion in rapidly growing cells. It mediates rapid entry or exit of water in response to abrupt changes in osmolarity (By similarity))	NA	NA	NA	NA(NA)	A0A078IUF9.1 PF00230.18;MIP;
A01	BjuA003606	3789453	3806084	4734	G1/G3	unnamed protein product [Brassica rapa]	SMXL4	Protein SMAX1-LIKE 4 OS=Arabidopsis thaliana GN=SMXL4 PE=1 SV=1	GO:0005634(nucleus);GO:0005737(cytoplasm);GO:0006351(transcription, DNA-templated);GO:0006355(regulation of transcription, DNA-templated);GO:0009507(chloroplast);GO:0010233(phloem transport);GO:0016787(hydrolase activity);GO:0019538(protein metabolic process);GO:0033500(carbohydrate homeostasis)	COG0542(ATP-dependent CLP protease ATP-binding subunit)	NA	NA	NA	NA(NA)	A0A0D3A3A1.1 PF13246.4;Cation_ATPase;
A01	BjuA003607	3816568	3819889	1212	G1/G3	unnamed protein product [Brassica rapa]	-	-	GO:0003674(molecular_function);GO:0005634(nucleus);GO:0005737(cytoplasm);GO:0005739(mitochondrion);GO:0006979(response to oxidative stress);GO:0009408(response to heat);GO:0009409(response to cold);GO:0010286(heat acclimation)	ENOG4110797(Protein of unknown function (DUF626))	-	-	-	-	D7MD70.1 PF00112.21;Peptidase_C1;
A01	BjuA003608	3820487	3821029	543	G1/G3	unnamed protein product [Brassica rapa]	At4g29550	UPF0725 protein At4g29550 OS=Arabidopsis thaliana GN=At4g29550 PE=2 SV=1	GO:0003674(molecular_function);GO:0005634(nucleus);GO:0008150(biological_process)	ENOG4110797(Protein of unknown function (DUF626))	-	-	-	-	-
A01	BjuA003609	3839068	3846503	2799	G1/G3	unnamed protein product [Brassica rapa]	ACA10	Calcium-transporting ATPase 10, plasma membrane-type OS=Arabidopsis thaliana GN=ACA10 PE=1 SV=2	GO:0005388(calcium-transporting ATPase activity);GO:0005516(calmodulin binding);GO:0005524(ATP binding);GO:0005886(plasma membrane);GO:0005887(integral component of plasma membrane);GO:0009506(plasmodesma);GO:0043231(intracellular membrane-bounded organelle);GO:0046872(metal ion binding);GO:0048281(inflorescence morphogenesis);GO:0048367(shoot system development);GO:0070588(calcium ion transmembr…	ENOG410XNNC(ATPase, Ca transporting, plasma membrane)	NA	NA	NA	NA(NA)	A0A078BV11.1 PF00702.24;Hydrolase;
A01	BjuA004227	9423726	9425403	1167	G1/G3	BnaA01g19130D [Brassica napus]	AMY1	Alpha-amylase 1 OS=Arabidopsis thaliana GN=AMY1 PE=1 SV=1	GO:0004556(alpha-amylase activity);GO:0005509(calcium ion binding);GO:0005576(extracellular region);GO:0005975(carbohydrate metabolic process);GO:0009737(response to abscisic acid);GO:0009739(response to gibberellin);GO:0048046(apoplast);GO:0103025(alpha-amylase activity (releasing maltohexaose))	COG0366(alpha amylase, catalytic)	K01176	alpha-amylase	EC:3.2.1.1	brp00500(Starch and sucrose metabolism)	M4F721.1 PF00128.22;Alpha-amylase;
A01	BjuA004700	11218805	11221882	1821	G1/G3	unnamed protein product [Brassica rapa]	MEB1	Membrane protein of ER body 1 OS=Arabidopsis thaliana GN=MEB1 PE=1 SV=1	GO:0005381(iron ion transmembrane transporter activity);GO:0005384(manganese ion transmembrane transporter activity);GO:0005783(endoplasmic reticulum);GO:0006880(intracellular sequestering of iron ion);GO:0010168(ER body);GO:0016020(membrane);GO:0030026(cellular manganese ion homeostasis);GO:0071281(cellular response to iron ion);GO:0071421(manganese ion transmembrane transport)	-	-	-	-	-	-
A01	BjuA004701	11222291	11224576	1773	G1/G3	hypothetical protein BRARA_A01762 [Brassica rapa]	MEB1	Membrane protein of ER body 1 OS=Arabidopsis thaliana GN=MEB1 PE=1 SV=1	GO:0005381(iron ion transmembrane transporter activity);GO:0005384(manganese ion transmembrane transporter activity);GO:0005515(protein binding);GO:0005634(nucleus);GO:0005783(endoplasmic reticulum);GO:0005789(endoplasmic reticulum membrane);GO:0006880(intracellular sequestering of iron ion);GO:0010168(ER body);GO:0016020(membrane);GO:0016021(integral component of membrane);GO:0030026(cellular ma…	ENOG41129ND(VIT family)	-	-	-	-	-
A01	BjuA004702	11227078	11231180	2367	G1/G3	unnamed protein product [Brassica rapa]	MEBL	Membrane protein of ER body-like protein OS=Arabidopsis thaliana GN=MEBL PE=2 SV=1	GO:0005634(nucleus);GO:0005789(endoplasmic reticulum membrane);GO:0006880(intracellular sequestering of iron ion);GO:0016020(membrane);GO:0016021(integral component of membrane)	ENOG41129ND(VIT family)	-	-	-	-	-
A01	BjuA004703	11232028	11233194	966	G1/G3	PREDICTED: E3 ubiquitin-protein ligase SINAT4-like [Brassica rapa]	SINAT4	E3 ubiquitin-protein ligase SINAT4 OS=Arabidopsis thaliana GN=SINAT4 PE=2 SV=1	GO:0005515(protein binding);GO:0005634(nucleus);GO:0005739(mitochondrion);GO:0006511(ubiquitin-dependent protein catabolic process);GO:0007275(multicellular organism development);GO:0008270(zinc ion binding);GO:0016567(protein ubiquitination)	ENOG410XVP0(e3 ubiquitin-protein ligase)	K04506	E3 ubiquitin-protein ligase SIAH1	EC:2.3.2.27	brp04120(Ubiquitin mediated proteolysis)	A0A078DZV1.1 PF03145.14;Sina;
A01	BjuA004704	11234060	11235046	867	G1/G3	PREDICTED: protein BOBBER 2 [Brassica rapa]	BOB2	Protein BOBBER 2 OS=Arabidopsis thaliana GN=BOB2 PE=2 SV=1	GO:0003674(molecular_function);GO:0005737(cytoplasm)	ENOG410XQVU(nudC domain containing)	NA	NA	NA	NA(NA)	A0A078CD70.1 PF04969.14;CS;
A01	BjuA004705	11241174	11241943	552	G1/G3	unnamed protein product [Brassica rapa]	PYL10	Abscisic acid receptor PYL10 OS=Arabidopsis thaliana GN=PYL10 PE=1 SV=1	GO:0004864(protein phosphatase inhibitor activity);GO:0005515(protein binding);GO:0005634(nucleus);GO:0005886(plasma membrane);GO:0010427(abscisic acid binding);GO:0080163(regulation of protein serine/threonine phosphatase activity)	ENOG41104BS(Polyketide cyclase / dehydrase and lipid transport)	K14496	abscisic acid receptor PYR/PYL family	-	brp04016(MAPK signaling pathway - plant);brp04075(Plant hormone signal transduction)	A0A078DKQ7.1 PF10604.7;Polyketide_cyc2;
A01	BjuA004706	11247147	11249393	1275	G1/G3	PREDICTED: mitochondrial carrier protein MTM1 [Brassica rapa]	MTM1	Mitochondrial carrier protein MTM1 OS=Arabidopsis thaliana GN=MTM1 PE=2 SV=1	GO:0005739(mitochondrion);GO:0005743(mitochondrial inner membrane);GO:0006810(transport);GO:0006839(mitochondrial transport);GO:0016021(integral component of membrane);GO:0016530(metallochaperone activity);GO:0022857(transmembrane transporter activity);GO:1901562(response to paraquat)	ENOG410XQVP(Solute carrier family 25 member)	NA	NA	NA	NA(NA)	A0A078J6C5.1 PF00153.25;Mito_carr;
A01	BjuA004707	11259569	11259811	243	G1/G3	unnamed protein product [Brassica oleracea]	-	-	-	COG5269(Transcription factor)	-	-	-	-	-
A01	BjuA004708	11269460	11284508	2400	G1/G3	PREDICTED: ethylene-responsive transcription factor CRF4-like [Brassica rapa]	SLAH2	S-type anion channel SLAH2 OS=Arabidopsis thaliana GN=SLAH2 PE=2 SV=1	GO:0005215(transporter activity);GO:0005886(plasma membrane);GO:0006873(cellular ion homeostasis);GO:0008308(voltage-gated anion channel activity);GO:0016021(integral component of membrane)	ENOG410YM3E(Transcription factor)	-	-	-	-	-
A01	BjuA004709	11285829	11289473	2469	G1/G3	PREDICTED: uncharacterized protein LOC106308497 isoform X2 [Brassica oleracea var. oleracea]	spast	Spastin OS=Danio rerio GN=spast PE=2 SV=2	GO:0005886(plasma membrane);GO:0016887(ATPase activity)	ENOG411055C(ATPase family associated with various cellular activities (AAA))	K03231	elongation factor 1-alpha	-	mtr03013(RNA transport)	F4I5A3.1 PF00004.27;AAA;
A01	BjuA004710	11289816	11291586	525	G1/G3	PREDICTED: uncharacterized protein LOC108833012 [Raphanus sativus]	-	-	GO:0003674(molecular_function);GO:0008150(biological_process);GO:0009507(chloroplast);GO:0009534(chloroplast thylakoid);GO:0009535(chloroplast thylakoid membrane)	ENOG410YWA9(NA)	-	-	-	-	A0A0D2TB56.1 PF00504.19;Chloroa_b-bind;
A01	BjuA005033	12757852	12758596	327	G1/G3	BnaC03g35090D [Brassica napus]	-	-	-	-	NA	NA	NA	NA(NA)	A0A078F4R3.1 PF00400.30;WD40;
A01	BjuA005034	12759657	12760025	369	G1/G3	unnamed protein product [Brassica oleracea]	-	-	GO:0003676(nucleic acid binding);GO:0003964(RNA-directed DNA polymerase activity);GO:0005575(cellular_component);GO:0008150(biological_process)	ENOG410Y65V(Retrotransposon protein)	-	-	-	-	A0A0D3E8S8.1 PF13456.4;RVT_3;
A01	BjuA005035	12771335	12774073	1596	G1/G3	PREDICTED: DEAD-box ATP-dependent RNA helicase 1 [Brassica rapa]	RH1	DEAD-box ATP-dependent RNA helicase 1 OS=Arabidopsis thaliana GN=RH1 PE=2 SV=3	GO:0003723(RNA binding);GO:0004004(ATP-dependent RNA helicase activity);GO:0005524(ATP binding);GO:0005634(nucleus);GO:0005730(nucleolus);GO:0005737(cytoplasm);GO:0008026(ATP-dependent helicase activity);GO:0010501(RNA secondary structure unwinding);GO:0017151(DEAD/H-box RNA helicase binding)	ENOG410XRWM(atp-dependent rna helicase)	NA	NA	NA	NA(NA)	A0A078I297.1 PF00270.27;DEAD;
A01	BjuA005036	12781035	12781337	303	G1/G3	BnaA01g18290D [Brassica napus]	PYROXD2	Pyridine nucleotide-disulfide oxidoreductase domain-containing protein 2 OS=Bos taurus GN=PYROXD2 PE=2 SV=1	GO:0005507(copper ion binding);GO:0005739(mitochondrion)	COG1233(phytoene)	-	-	-	-	A0A0B0NWF2.1 PF13450.4;NAD_binding_8;
A01	BjuA005037	12785641	12788915	1701	G1/G3	unnamed protein product [Brassica rapa]	PYROXD2	Pyridine nucleotide-disulfide oxidoreductase domain-containing protein 2 OS=Bos taurus GN=PYROXD2 PE=2 SV=1	GO:0005507(copper ion binding);GO:0005739(mitochondrion)	COG1233(phytoene)	K09835	prolycopene isomerase	EC:5.2.1.13	smo00906(Carotenoid biosynthesis)	A0A078I4U7.1 PF01593.22;Amino_oxidase;
A01	BjuA005038	12789153	12790004	852	G1/G3	PREDICTED: protein N-lysine methyltransferase METTL21A [Brassica rapa]	mettl21a	Protein N-lysine methyltransferase METTL21A OS=Danio rerio GN=mettl21a PE=2 SV=1	GO:0005737(cytoplasm);GO:0008168(methyltransferase activity);GO:0032259(methylation)	ENOG41121JN(methyltransferase like 21C)	NA	NA	NA	NA(NA)	M4EXH9.1 PF10294.7;Methyltransf_16;
A01	BjuA005039	12791031	12796834	3318	G1/G3	unnamed protein product [Brassica rapa]	TOC159	Translocase of chloroplast 159, chloroplastic OS=Arabidopsis thaliana GN=TOC159 PE=1 SV=1	GO:0005515(protein binding)	ENOG410Y1GS(NA)	-	-	-	-	A0A0D3A7U0.1 PF04548.14;AIG1;
A01	BjuA005040	12799018	12803600	2733	G1/G3	unnamed protein product [Brassica rapa]	TOC159	Translocase of chloroplast 159, chloroplastic OS=Arabidopsis thaliana GN=TOC159 PE=1 SV=1	GO:0005515(protein binding)	ENOG410Y1GS(NA)	-	-	-	-	A0A0D3A7U0.1 PF04548.14;AIG1;
A01	BjuA005041	12805374	12806915	489	G1/G3	hypothetical protein [Arabidopsis thaliana]	-	-	GO:0005634(nucleus);GO:0008150(biological_process)	ENOG410XX9Y(NA)	-	-	-	-	-
A01	BjuA005042	12807571	12811606	2727	G1/G3	hypothetical protein BRARA_A01960 [Brassica rapa]	CAGL0M01936g	Vacuolar membrane protease OS=Candida glabrata (strain ATCC 2001 / CBS 138 / JCM 3761 / NBRC 0622 / NRRL Y-65) GN=CAGL0M01936g PE=3 SV=1	GO:0005783(endoplasmic reticulum);GO:0016021(integral component of membrane)	COG2234(peptidase m28)	-	-	-	-	V4LYX8.1 PF04389.15;Peptidase_M28;
A01	BjuA005043	12821697	12823597	666	G1/G3	vesicle-associated membrane protein 724 isoform X1 [Brassica napus]	VAMP724	Vesicle-associated membrane protein 724 OS=Arabidopsis thaliana GN=VAMP724 PE=2 SV=2	GO:0000149(SNARE binding);GO:0005484(SNAP receptor activity);GO:0006887(exocytosis);GO:0006906(vesicle fusion);GO:0031201(SNARE complex)	COG5143(Vesicle-associated membrane protein)	NA	NA	NA	NA(NA)	I1MGK7.1 PF00957.19;Synaptobrevin;
A01	BjuA005044	12825551	12829495	1815	G1/G3	PREDICTED: putative cytochrome P450 71A28 [Brassica rapa]	CYP71A28	Putative cytochrome P450 71A28 OS=Arabidopsis thaliana GN=CYP71A28 PE=3 SV=2	GO:0005506(iron ion binding);GO:0016020(membrane);GO:0016021(integral component of membrane);GO:0016705(oxidoreductase activity, acting on paired donors, with incorporation or reduction of molecular oxygen);GO:0016709(oxidoreductase activity, acting on paired donors, with incorporation or reduction of molecular oxygen, NAD(P)H as one donor, and incorporation of one atom of oxygen);GO:0019825(oxyg…	COG2124(Cytochrome p450)	NA	NA	NA	NA(NA)	A0A078CP51.1 PF00067.20;p450;
A01	BjuA005045	12831466	12831874	345	G1/G3	-	-	-	-	-	-	-	-	-	-
A01	BjuA005046	12836898	12838220	1323	G1/G3	uncharacterized protein LOC106376301 [Brassica napus]	SRC2	Protein SRC2 OS=Glycine max GN=SRC2 PE=2 SV=1	GO:0003674(molecular_function);GO:0005575(cellular_component);GO:0008150(biological_process)	ENOG41108VH(Domain-Containing protein)	-	-	-	-	M4EXH1.1 PF00168.28;C2;
A01	BjuA005047	12861356	12865805	2808	G1/G3	hypothetical protein BRARA_A01969 [Brassica rapa]	-	-	GO:0005634(nucleus);GO:0008150(biological_process);GO:0008270(zinc ion binding);GO:0009506(plasmodesma)	ENOG410XW8A(CW-type Zinc Finger)	-	-	-	-	M4EXG8.1 PF07496.13;zf-CW;
A01	BjuA005048	12868520	12868825	306	G1/G3	PREDICTED: monothiol glutaredoxin-S4-like [Brassica rapa]	GRXS4	Monothiol glutaredoxin-S4 OS=Arabidopsis thaliana GN=GRXS4 PE=3 SV=1	GO:0005634(nucleus);GO:0005737(cytoplasm);GO:0008794(arsenate reductase (glutaredoxin) activity);GO:0009055(electron transfer activity);GO:0015035(protein disulfide oxidoreductase activity);GO:0045454(cell redox homeostasis);GO:0046872(metal ion binding);GO:0051537(2 iron, 2 sulfur cluster binding)	COG0695(Glutaredoxin)	NA	NA	NA	NA(NA)	A0A078JLT0.1 PF00462.22;Glutaredoxin;
A01	BjuA005049	12873501	12873806	306	G1/G3	PREDICTED: monothiol glutaredoxin-S4 [Brassica rapa]	GRXS4	Monothiol glutaredoxin-S4 OS=Arabidopsis thaliana GN=GRXS4 PE=3 SV=1	GO:0005634(nucleus);GO:0005737(cytoplasm);GO:0008794(arsenate reductase (glutaredoxin) activity);GO:0009055(electron transfer activity);GO:0015035(protein disulfide oxidoreductase activity);GO:0045454(cell redox homeostasis);GO:0046872(metal ion binding);GO:0051537(2 iron, 2 sulfur cluster binding)	COG0695(Glutaredoxin)	NA	NA	NA	NA(NA)	V4P8H4.1 PF00462.22;Glutaredoxin;
A01	BjuA005050	12878684	12878992	309	G1/G3	PREDICTED: monothiol glutaredoxin-S4-like [Brassica rapa]	GRXS4	Monothiol glutaredoxin-S4 OS=Arabidopsis thaliana GN=GRXS4 PE=3 SV=1	GO:0005634(nucleus);GO:0005737(cytoplasm);GO:0008794(arsenate reductase (glutaredoxin) activity);GO:0009055(electron transfer activity);GO:0015035(protein disulfide oxidoreductase activity);GO:0045454(cell redox homeostasis);GO:0046872(metal ion binding);GO:0051537(2 iron, 2 sulfur cluster binding)	COG0695(Glutaredoxin)	NA	NA	NA	NA(NA)	M4EXG4.1 PF00462.22;Glutaredoxin;
A01	BjuA005051	12885404	12885715	312	G1/G3	PREDICTED: monothiol glutaredoxin-S4-like [Brassica rapa]	GRXS4	Monothiol glutaredoxin-S4 OS=Arabidopsis thaliana GN=GRXS4 PE=3 SV=1	GO:0005634(nucleus);GO:0005737(cytoplasm);GO:0008794(arsenate reductase (glutaredoxin) activity);GO:0009055(electron transfer activity);GO:0015035(protein disulfide oxidoreductase activity);GO:0045454(cell redox homeostasis);GO:0046872(metal ion binding);GO:0051537(2 iron, 2 sulfur cluster binding)	COG0695(Glutaredoxin)	NA	NA	NA	NA(NA)	V4P8H4.1 PF00462.22;Glutaredoxin;
A01	BjuA005052	12894338	12905130	498	G1/G3	PREDICTED: caffeic acid 3-O-methyltransferase-like [Brassica oleracea var. oleracea]	COMT	Caffeic acid 3-O-methyltransferase OS=Ammi majus GN=COMT PE=1 SV=1	GO:0005829(cytosol);GO:0008171(O-methyltransferase activity);GO:0009507(chloroplast);GO:0009809(lignin biosynthetic process)	ENOG410XS7T(o-methyltransferase)	K13066	caffeic acid 3-O-methyltransferase	EC:2.1.1.68	sot00940(Phenylpropanoid biosynthesis)	A0A0D3A7W3.1 PF00891.16;Methyltransf_2;
A01	BjuA005053	12905135	12905350	216	G1/G3	hypothetical protein BRARA_A01973 [Brassica rapa]	COMT2	Caffeic acid 3-O-methyltransferase 2 OS=Ocimum basilicum GN=COMT2 PE=2 SV=1	GO:0005829(cytosol);GO:0008171(O-methyltransferase activity);GO:0009507(chloroplast);GO:0009809(lignin biosynthetic process)	ENOG410XS7T(o-methyltransferase)	K13066	caffeic acid 3-O-methyltransferase	EC:2.1.1.68	vvi00940(Phenylpropanoid biosynthesis)	A0A0D3A7W3.1 PF00891.16;Methyltransf_2;
A01	BjuA005132	15559835	15561105	1179	G1/G2	unnamed protein product, partial [Brassica rapa]	PUP18	Probable purine permease 18 OS=Arabidopsis thaliana GN=PUP18 PE=1 SV=1	GO:0005345(purine nucleobase transmembrane transporter activity);GO:0005886(plasma membrane);GO:0006863(purine nucleobase transport);GO:0009507(chloroplast);GO:0016020(membrane);GO:0016021(integral component of membrane)	ENOG41105E8(Triose-phosphate Transporter family)	-	-	-	-	A0A0D3A9Z8.1 PF16913.3;PUNUT;
A01	BjuA005133	15577423	15580105	1620	G1/G2	bromodomain-containing protein 4-like [Brassica napus]	brd4-b	Bromodomain-containing protein 4B OS=Xenopus laevis GN=brd4-b PE=2 SV=1	GO:0002039(p53 binding);GO:0003682(chromatin binding);GO:0005634(nucleus);GO:0032968(positive regulation of transcription elongation from RNA polymerase II promoter);GO:0043123(positive regulation of I-kappaB kinase/NF-kappaB signaling);GO:0045944(positive regulation of transcription by RNA polymerase II);GO:0050727(regulation of inflammatory response);GO:0070577(lysine-acetylated histone binding…	COG5076(bromodomain)	NA	NA	NA	NA(NA)	M4F318.1 PF00439.23;Bromodomain;
A01	BjuA005134	15602247	15604771	1158	G1/G2	hypothetical protein DY000_00025850 [Brassica cretica]	HISN1A	ATP phosphoribosyltransferase 1, chloroplastic OS=Arabidopsis thaliana GN=HISN1A PE=1 SV=1	GO:0000105(histidine biosynthetic process);GO:0000287(magnesium ion binding);GO:0003879(ATP phosphoribosyltransferase activity);GO:0009507(chloroplast);GO:0009570(chloroplast stroma)	COG0040(Catalyzes the condensation of ATP and 5-phosphoribose 1- diphosphate to form N'-(5'-phosphoribosyl)-ATP (PR-ATP). Has a crucial role in the pathway because the rate of histidine biosynthesis seems to be controlled primarily by regulation of HisG enzymatic activity (By similarity))	K00765	ATP phosphoribosyltransferase	EC:2.4.2.17	bna00340(Histidine metabolism)	M4EGH3.1 PF01634.16;HisG;
A01	BjuA005135	15612790	15614208	1011	G1/G2	uncharacterized protein At4g06598 [Brassica napus]	At4g06598	Uncharacterized protein At4g06598 OS=Arabidopsis thaliana GN=At4g06598 PE=2 SV=2	GO:0003677(DNA binding);GO:0003700(DNA binding transcription factor activity);GO:0005634(nucleus);GO:0006355(regulation of transcription, DNA-templated)	ENOG410YFJG(Transcription factor)	K04374	cyclic AMP-dependent transcription factor ATF-4	-	mus04141(Protein processing in endoplasmic reticulum)	V4WEK8.1 PF00170.19;bZIP_1;
A01	BjuA005136	15624478	15625734	1257	G1/G2	uncharacterized protein LOC106360676 [Brassica napus]	-	-	-	ENOG410YHKF(NA)	-	-	-	-	-
A01	BjuA005137	15626076	15627756	756	G1/G2	beta carbonic anhydrase 6, mitochondrial-like isoform X2 [Brassica napus]	BCA6	Beta carbonic anhydrase 6, mitochondrial OS=Arabidopsis thaliana GN=BCA6 PE=2 SV=1	GO:0004089(carbonate dehydratase activity);GO:0005739(mitochondrion);GO:0008270(zinc ion binding);GO:0009507(chloroplast);GO:0015976(carbon utilization)	COG0288(carbonic anhydrase)	K01673	carbonic anhydrase	EC:4.2.1.1	brp00910(Nitrogen metabolism)	A0A0D3AA11.1 PF00484.17;Pro_CA;
A01	BjuA005138	15633859	15634116	258	G1/G2	hypothetical protein DY000_00014758 [Brassica cretica]	-	-	-	-	-	-	-	-	-
A01	BjuA005139	15636169	15647977	1059	G1/G2	MDIS1-interacting receptor like kinase 1-like [Brassica napus]	-	-	GO:0007165(signal transduction);GO:0009507(chloroplast)	COG4886(leucine Rich Repeat)	-	-	-	-	A0A078I9P8.1 PF08263.10;LRRNT_2;
A01	BjuA005140	15655856	15659076	1659	G1/G2	BnaAnng21790D [Brassica napus]	MSL3	Mechanosensitive ion channel protein 3, chloroplastic OS=Arabidopsis thaliana GN=MSL3 PE=1 SV=1	GO:0005216(ion channel activity);GO:0005886(plasma membrane);GO:0006811(ion transport);GO:0006970(response to osmotic stress);GO:0009526(plastid envelope);GO:0009657(plastid organization);GO:0010020(chloroplast fission);GO:0016020(membrane);GO:0016021(integral component of membrane);GO:0031969(chloroplast membrane);GO:0055085(transmembrane transport)	COG0668(Mechanosensitive ion channel)	NA	NA	NA	NA(NA)	A0A0D3AA14.1 PF00924.16;MS_channel;
A01	BjuA005141	15682908	15683312	405	G1/G2	hypothetical protein BRARA_G00233 [Brassica rapa]	fabG	3-oxoacyl-[acyl-carrier-protein] reductase FabG OS=Chlamydia trachomatis (strain D/UW-3/Cx) GN=fabG PE=3 SV=3	GO:0016491(oxidoreductase activity);GO:0055114(oxidation-reduction process)	COG1028(Dehydrogenase reductase)	K08081	tropinone reductase I	EC:1.1.1.206	sbi00960(Tropane, piperidine and pyridine alkaloid biosynthesis)	M4DE41.1 PF13561.4;adh_short_C2;
A01	BjuA005142	15686503	15687559	450	G1/G2	unnamed protein product, partial [Brassica oleracea]	PAT18	Protein S-acyltransferase 18 OS=Arabidopsis thaliana GN=PAT18 PE=2 SV=2	GO:0005783(endoplasmic reticulum);GO:0005789(endoplasmic reticulum membrane);GO:0016021(integral component of membrane);GO:0019706(protein-cysteine S-palmitoyltransferase activity);GO:0030659(cytoplasmic vesicle membrane)	COG5273(Zinc finger, DHHC-type containing)	NA	NA	NA	NA(NA)	-
A01	BjuA005143	15691151	15693428	1314	G1/G2	hypothetical protein BRARA_G00234 [Brassica rapa]	ERD7	Protein EARLY-RESPONSIVE TO DEHYDRATION 7, chloroplastic OS=Arabidopsis thaliana GN=ERD7 PE=1 SV=1	GO:0003674(molecular_function);GO:0005737(cytoplasm);GO:0005886(plasma membrane);GO:0007623(circadian rhythm);GO:0009409(response to cold);GO:0009414(response to water deprivation);GO:0009507(chloroplast);GO:0009644(response to high light intensity);GO:0009651(response to salt stress);GO:0009737(response to abscisic acid)	ENOG410ZEPM(Spastic paraplegia 20 (Troyer syndrome))	K19366	spartin	-	brp04144(Endocytosis)	A0A078F077.1 PF06911.10;Senescence;
A01	BjuA005530	25374270	25381164	2880	G1/G3	uncharacterized protein LOC106352948 [Brassica napus]	-	Alpha-glucosidase 2 OS=Bacillus thermoamyloliquefaciens PE=3 SV=1	GO:0004553(hydrolase activity, hydrolyzing O-glycosyl compounds);GO:0005634(nucleus);GO:0009507(chloroplast)	COG1501(hydrolase, family 31)	K01187	alpha-glucosidase	EC:3.2.1.20	osa00052(Galactose metabolism);osa00500(Starch and sucrose metabolism)	A0A087HC11.1 PF01055.24;Glyco_hydro_31;
A01	BjuA005983	34890901	34891979	663	G1/G3	PREDICTED: uncharacterized protein LOC103840739 [Brassica rapa]	-	-	GO:0005739(mitochondrion)	ENOG410YG52(positive regulation of collateral sprouting)	K19476	vacuolar protein sorting-associated protein IST1	-	brp04144(Endocytosis)	A0A078G0N4.1 PF03398.12;Ist1;
A01	BjuA005984	34897625	34899132	957	G1/G3	PREDICTED: ribosome biogenesis protein BRX1-like [Brassica rapa]	BRIX1-2	Ribosome biogenesis protein BRX1 homolog 2 OS=Arabidopsis thaliana GN=BRIX1-2 PE=2 SV=1	GO:0000027(ribosomal large subunit assembly);GO:0003723(RNA binding);GO:0005634(nucleus);GO:0005730(nucleolus);GO:0005829(cytosol);GO:0006364(rRNA processing)	COG5154(ribosome biogenesis protein brx1)	NA	NA	NA	NA(NA)	A0A0D3CJW8.1 PF04427.16;Brix;
A01	BjuA005985	34899391	34900522	759	G1/G3	BnaA01g28900D [Brassica napus]	TSJT1	Stem-specific protein TSJT1 OS=Nicotiana tabacum GN=TSJT1 PE=2 SV=1	GO:0009507(chloroplast)	ENOG410YD56(Stem-specific protein)	NA	NA	NA	NA(NA)	M4DX64.1 PF12481.6;DUF3700;
A01	BjuA005986	34917145	34919268	1467	G1/G3	PREDICTED: ultraviolet-B receptor UVR8-like, partial [Brassica rapa]	HERC2	Probable E3 ubiquitin-protein ligase HERC2 OS=Drosophila melanogaster GN=HERC2 PE=1 SV=3	GO:0005575(cellular_component);GO:0008150(biological_process);GO:0008536(Ran GTPase binding)	COG5184(regulator of chromosome condensation)	K10615	E3 ubiquitin-protein ligase HERC4	EC:2.3.2.26	mis04120(Ubiquitin mediated proteolysis)	A0A078EEA4.1 PF00415.16;RCC1;
A01	BjuA005987	34920923	34921912	990	G1/G3	ATA20-like protein [Brassica juncea]	-	-	GO:0003674(molecular_function);GO:0008150(biological_process);GO:0009505(plant-type cell wall)	-	-	-	-	-	-
A01	BjuA005988	34923290	34926019	1305	G1/G3	PREDICTED: putative nuclear RNA export factor SDE5 isoform X1 [Brassica rapa]	SDE5	Putative nuclear RNA export factor SDE5 OS=Arabidopsis thaliana GN=SDE5 PE=2 SV=1	GO:0003674(molecular_function);GO:0005634(nucleus);GO:0006952(defense response);GO:0009507(chloroplast);GO:0010267(production of ta-siRNAs involved in RNA interference)	ENOG41101K4(NEDD4 binding protein)	-	-	-	-	A0A078EC35.1 PF08590.8;DUF1771;
A01	BjuA005989	34929671	34931042	552	G1/G3	LOW QUALITY PROTEIN: choline transporter protein 1 [Brassica napus]	-	-	GO:0005634(nucleus);GO:0005802(trans-Golgi network);GO:0005856(cytoskeleton);GO:0005886(plasma membrane);GO:0009506(plasmodesma);GO:0009524(phragmoplast);GO:0009551(secondary plasmodesma);GO:0009663(plasmodesma organization);GO:0010051(xylem and phloem pattern formation);GO:0010067(procambium histogenesis);GO:0010088(phloem development);GO:0015220(choline transmembrane transporter activity);GO:00…	ENOG410XS0P(Solute carrier family 44 member)	NA	NA	NA	NA(NA)	M4DX61.1 PF04515.10;Choline_transpo;
A01	BjuA005990	34931089	34931559	279	G1/G3	LOW QUALITY PROTEIN: choline transporter protein 1 [Brassica napus]	-	-	GO:0005634(nucleus);GO:0005802(trans-Golgi network);GO:0005856(cytoskeleton);GO:0005886(plasma membrane);GO:0009506(plasmodesma);GO:0009524(phragmoplast);GO:0009551(secondary plasmodesma);GO:0009663(plasmodesma organization);GO:0010051(xylem and phloem pattern formation);GO:0010067(procambium histogenesis);GO:0010088(phloem development);GO:0015220(choline transmembrane transporter activity);GO:00…	ENOG410XS0P(Solute carrier family 44 member)	NA	NA	NA	NA(NA)	-
A01	BjuA005991	34933807	34936393	1791	G1/G3	probable ubiquitin-conjugating enzyme E2 25 [Brassica napus]	UBC25	Probable ubiquitin-conjugating enzyme E2 25 OS=Arabidopsis thaliana GN=UBC25 PE=2 SV=1	GO:0005524(ATP binding);GO:0005634(nucleus);GO:0005737(cytoplasm);GO:0016567(protein ubiquitination);GO:0031625(ubiquitin protein ligase binding);GO:0061630(ubiquitin protein ligase activity)	ENOG410XP8C(ubiquitin-conjugating enzyme)	K10581	ubiquitin-conjugating enzyme E2 O	EC:2.3.2.24	bna04120(Ubiquitin mediated proteolysis)	A0A0D3ADF9.1 PF00179.24;UQ_con;
A01	BjuA005992	34946238	34948358	642	G1/G3	unnamed protein product [Brassica oleracea]	COX17-1	Cytochrome c oxidase copper chaperone 1 OS=Arabidopsis thaliana GN=COX17-1 PE=2 SV=1	GO:0003674(molecular_function);GO:0008150(biological_process);GO:0009507(chloroplast);GO:0016021(integral component of membrane)	ENOG41115QZ(NA)	K02260	cytochrome c oxidase assembly protein subunit 17	-	boe00190(Oxidative phosphorylation)	M4DX58.1 PF05051.11;COX17;
A01	BjuA005993	34948967	34949657	504	G1/G3	BnaA01g28820D [Brassica napus]	-	-	GO:0003674(molecular_function);GO:0005634(nucleus);GO:0008150(biological_process);GO:0016021(integral component of membrane)	ENOG41120I3(NA)	-	-	-	-	-
A01	BjuA005994	34950655	34951482	828	G1/G3	PREDICTED: lectin-like protein LEC [Brassica rapa]	At3g16530	Lectin-like protein At3g16530 OS=Arabidopsis thaliana GN=At3g16530 PE=1 SV=1	GO:0002239(response to oomycetes);GO:0005618(cell wall);GO:0005634(nucleus);GO:0005886(plasma membrane);GO:0009505(plant-type cell wall);GO:0010200(response to chitin);GO:0030246(carbohydrate binding);GO:0048046(apoplast)	ENOG411192G(legume lectin family protein)	NA	NA	NA	NA(NA)	A0A078G5U7.1 PF00139.17;Lectin_legB;
A01	BjuA005995	34953260	34956729	2340	G1/G3	PREDICTED: protein SPA1-RELATED 3-like isoform X1 [Brassica rapa]	SPA3	Protein SPA1-RELATED 3 OS=Arabidopsis thaliana GN=SPA3 PE=1 SV=1	GO:0004672(protein kinase activity);GO:0005515(protein binding);GO:0005524(ATP binding);GO:0005634(nucleus);GO:0005834(heterotrimeric G-protein complex);GO:0006468(protein phosphorylation);GO:0009585(red, far-red light phototransduction);GO:0009637(response to blue light);GO:0042802(identical protein binding);GO:0080008(Cul4-RING E3 ubiquitin ligase complex)	ENOG410XS0B(eukaryotic translation initiation factor 2alpha kinase)	K10143	E3 ubiquitin-protein ligase RFWD2	EC:2.3.2.27	brp04120(Ubiquitin mediated proteolysis);brp04712(Circadian rhythm - plant)	D8SMD4.1 PF00069.23;Pkinase;
A01	BjuA005996	34957133	34959234	1044	G1/G3	unnamed protein product [Brassica rapa]	GLCAT14A	Beta-glucuronosyltransferase GlcAT14A OS=Arabidopsis thaliana GN=GLCAT14A PE=2 SV=1	GO:0005794(Golgi apparatus);GO:0008375(acetylglucosaminyltransferase activity);GO:0016020(membrane);GO:0016021(integral component of membrane);GO:0016051(carbohydrate biosynthetic process);GO:0016757(transferase activity, transferring glycosyl groups)	ENOG410XQ7M(Glucosaminyl (N-acetyl) transferase)	NA	NA	NA	NA(NA)	A0A0D3ADG5.1 PF02485.19;Branch;
A01	BjuA005997	34963232	34963898	312	G1/G3	BnaA01g28780D [Brassica napus]	PPI2	Proton pump-interactor 2 OS=Arabidopsis thaliana GN=PPI2 PE=2 SV=1	GO:0005737(cytoplasm);GO:0010155(regulation of proton transport);GO:0016021(integral component of membrane)	-	-	-	-	-	-
A01	BjuA005998	34980516	34981163	648	G1/G3	VQ motif-containing protein 19 [Brassica napus]	VQ19	VQ motif-containing protein 19 OS=Arabidopsis thaliana GN=VQ19 PE=1 SV=1	GO:0003674(molecular_function);GO:0005634(nucleus);GO:0008150(biological_process)	ENOG4111AFW(VQ motif-containing protein)	-	-	-	-	-
A01	BjuA005999	34986922	34987544	531	G1/G3	squamosa promoter-binding-like protein 5 [Brassica napus]	SPL5	Squamosa promoter-binding-like protein 5 OS=Arabidopsis thaliana GN=SPL5 PE=2 SV=1	GO:0003677(DNA binding);GO:0003700(DNA binding transcription factor activity);GO:0005634(nucleus);GO:0005737(cytoplasm);GO:0006351(transcription, DNA-templated);GO:0006355(regulation of transcription, DNA-templated);GO:0010321(regulation of vegetative phase change);GO:0046872(metal ion binding)	ENOG410YKCI(squamosa)	-	-	-	-	A0A0D3ECQ9.1 PF03110.12;SBP;
A01	BjuA006000	34989092	34989445	354	G1/G3	unnamed protein product [Brassica rapa]	-	-	GO:0004674(protein serine/threonine kinase activity);GO:0005634(nucleus)	-	-	-	-	-	-
A01	BjuA006001	35005530	35006168	639	G1/G3	PREDICTED: ethylene-responsive transcription factor 4-like [Brassica rapa]	ERF4	Ethylene-responsive transcription factor 4 OS=Arabidopsis thaliana GN=ERF4 PE=1 SV=1	GO:0003677(DNA binding);GO:0003700(DNA binding transcription factor activity);GO:0005515(protein binding);GO:0005634(nucleus);GO:0006351(transcription, DNA-templated);GO:0006355(regulation of transcription, DNA-templated);GO:0009723(response to ethylene);GO:0009737(response to abscisic acid);GO:0009864(induced systemic resistance, jasmonic acid mediated signaling pathway);GO:0009873(ethylene-acti…	ENOG410YQ8J(Transcription factor)	NA	NA	NA	NA(NA)	A0A067JVT3.1 PF00847.18;AP2;
A01	BjuA006002	35009298	35010102	597	G1/G3	PREDICTED: 30S ribosomal protein S20, chloroplastic-like [Brassica rapa]	RPS20	30S ribosomal protein S20, chloroplastic OS=Arabidopsis thaliana GN=RPS20 PE=2 SV=1	GO:0003735(structural constituent of ribosome);GO:0005840(ribosome);GO:0006412(translation);GO:0009507(chloroplast);GO:0009570(chloroplast stroma);GO:0009941(chloroplast envelope);GO:0016020(membrane);GO:0019843(rRNA binding);GO:0042254(ribosome biogenesis)	ENOG41129UT(ribosomal protein S20)	K02968	small subunit ribosomal protein S20	-	brp03010(Ribosome)	D7L400.1 PF01649.16;Ribosomal_S20p;
A01	BjuA006003	35012359	35012820	462	G1/G3	unnamed protein product [Brassica rapa]	NAC054	Protein CUP-SHAPED COTYLEDON 1 OS=Arabidopsis thaliana GN=NAC054 PE=1 SV=1	GO:0003677(DNA binding);GO:0003700(DNA binding transcription factor activity);GO:0005634(nucleus);GO:0006351(transcription, DNA-templated);GO:0006355(regulation of transcription, DNA-templated);GO:0009793(embryo development ending in seed dormancy);GO:0009908(flower development);GO:0010014(meristem initiation);GO:0010072(primary shoot apical meristem specification);GO:0010223(secondary shoot form…	-	-	-	-	-	-
A01	BjuA006004	35019922	35021514	1026	G1/G3	PREDICTED: F-box/kelch-repeat protein At3g04660-like [Brassica rapa]	At3g04660	F-box/kelch-repeat protein At3g04660 OS=Arabidopsis thaliana GN=At3g04660 PE=1 SV=1	GO:0003674(molecular_function);GO:0005634(nucleus);GO:0016567(protein ubiquitination)	-	-	-	-	-	A0A078G427.1 PF08268.10;FBA_3;
A01	BjuA006005	35027591	35028250	660	G1/G3	uncharacterized protein LOC106349355 [Brassica napus]	-	-	GO:0003674(molecular_function);GO:0005634(nucleus);GO:0008150(biological_process)	ENOG410YUXP(Pfam:DUF584)	-	-	-	-	A0A078G639.1 PF04520.11;Senescence_reg;
A01	BjuA011921	11381471	11381728	258	G1/G3	PREDICTED: uncharacterized protein LOC103867927 [Brassica rapa]	-	-	GO:0003674(molecular_function);GO:0005634(nucleus);GO:0008150(biological_process)	ENOG410ZGXP(Wound-induced protein)	-	-	-	-	A0A078DJW6.1 PF12609.6;DUF3774;
A01	BjuA011922	11379592	11380767	1176	G1/G3	uncharacterized protein LOC106452765 [Brassica napus]	-	-	GO:0003674(molecular_function);GO:0005634(nucleus);GO:0008150(biological_process)	ENOG410YPUT(NA)	-	-	-	-	-
A01	BjuA011923	11376096	11377307	1029	G1/G3	uncharacterized protein LOC106364163 [Brassica napus]	-	-	GO:0003674(molecular_function);GO:0009409(response to cold);GO:0009507(chloroplast);GO:0009793(embryo development ending in seed dormancy);GO:0016021(integral component of membrane)	ENOG41125Z2(NA)	-	-	-	-	-
A01	BjuA011924	11372820	11374229	729	G1/G3	PREDICTED: protein ULTRAPETALA 1 [Brassica rapa]	ULT1	Protein ULTRAPETALA 1 OS=Arabidopsis thaliana GN=ULT1 PE=1 SV=1	GO:0005634(nucleus);GO:0005829(cytosol)	ENOG410YE1G(ultrapetala)	-	-	-	-	A0A0D3A777.1 PF01342.19;SAND;
A01	BjuA011925	11370011	11370781	771	G1/G3	E3 ubiquitin-protein ligase RNF12-B [Brassica napus]	-	-	GO:0003674(molecular_function);GO:0005634(nucleus)	ENOG41105SV(NA)	-	-	-	-	-
A01	BjuA011926	11368805	11369661	351	G1/G3	PREDICTED: uncharacterized protein LOC106332578, partial [Brassica oleracea var. oleracea]	-	-	GO:0003674(molecular_function);GO:0008150(biological_process)	ENOG4110653(NA)	-	-	-	-	-
A01	BjuA011927	11359053	11365856	2763	G1/G3	hypothetical protein BRARA_D00940, partial [Brassica rapa]	-	-	GO:0003964(RNA-directed DNA polymerase activity)	ENOG410Y65V(Retrotransposon protein)	K01188	beta-glucosidase	EC:3.2.1.21	bna00500(Starch and sucrose metabolism);bna00460(Cyanoamino acid metabolism);bna00940(Phenylpropanoid biosynthesis)	A0A078GTD2.1 PF14111.4;DUF4283;
A01	BjuA011928	11353996	11354874	879	G1/G3	PREDICTED: ethylene-responsive transcription factor ERF054-like [Brassica rapa]	ERF054	Ethylene-responsive transcription factor ERF054 OS=Arabidopsis thaliana GN=ERF054 PE=2 SV=1	GO:0003677(DNA binding);GO:0003700(DNA binding transcription factor activity);GO:0005634(nucleus);GO:0006351(transcription, DNA-templated);GO:0006355(regulation of transcription, DNA-templated);GO:0009873(ethylene-activated signaling pathway);GO:0010200(response to chitin)	ENOG410YGYW(Transcription factor)	NA	NA	NA	NA(NA)	A0A078EDJ4.1 PF00847.18;AP2;
A01	BjuA011929	11350497	11351117	621	G1/G3	hypothetical protein BRARA_A01783 [Brassica rapa]	MYB39	Transcription factor MYB39 OS=Arabidopsis thaliana GN=MYB39 PE=2 SV=1	GO:0000981(RNA polymerase II transcription factor activity, sequence-specific DNA binding);GO:0001135(transcription factor activity, RNA polymerase II transcription factor recruiting);GO:0003677(DNA binding);GO:0003700(DNA binding transcription factor activity);GO:0005515(protein binding);GO:0005634(nucleus);GO:0006351(transcription, DNA-templated);GO:0006355(regulation of transcription, DNA-temp…	COG5147(Myblike DNAbinding domain containing protein)	NA	NA	NA	NA(NA)	U5G2V7.1 PF13921.4;Myb_DNA-bind_6;
A01	BjuA011930	11347437	11348766	909	G1/G3	hypothetical protein BRARA_A01782 [Brassica rapa]	At4g28100	Uncharacterized GPI-anchored protein At4g28100 OS=Arabidopsis thaliana GN=At4g28100 PE=1 SV=1	GO:0003674(molecular_function);GO:0005886(plasma membrane);GO:0008150(biological_process);GO:0031225(anchored component of membrane);GO:0046658(anchored component of plasma membrane)	ENOG410YB0S(NA)	NA	NA	NA	NA(NA)	-
A01	BjuA011931	11337074	11339470	1422	G1/G3	PREDICTED: lactation elevated protein 1 [Brassica rapa]	LACE1	Lactation elevated protein 1 OS=Homo sapiens GN=LACE1 PE=1 SV=2	GO:0005524(ATP binding);GO:0005575(cellular_component);GO:0008150(biological_process);GO:0016887(ATPase activity)	COG1485(AFG1 family ATPase)	NA	NA	NA	NA(NA)	A0A078G1Z0.1 PF03969.14;AFG1_ATPase;
A01	BjuA011932	11334317	11335374	795	G1/G3	PREDICTED: tetraspanin-7 [Brassica rapa]	TET7	Tetraspanin-7 OS=Arabidopsis thaliana GN=TET7 PE=2 SV=1	GO:0003674(molecular_function);GO:0005576(extracellular region);GO:0007568(aging);GO:0009506(plasmodesma);GO:0016021(integral component of membrane);GO:0099402(plant organ development)	ENOG4110562(Tetraspanin family)	NA	NA	NA	NA(NA)	A0A0D3DGI4.1 PF00335.18;Tetraspannin;
A01	BjuA011933	11333064	11334005	780	G1/G3	PREDICTED: WAT1-related protein At4g28040 [Brassica oleracea var. oleracea]	At4g28040	WAT1-related protein At4g28040 OS=Arabidopsis thaliana GN=At4g28040 PE=2 SV=1	GO:0005886(plasma membrane);GO:0006810(transport);GO:0009507(chloroplast);GO:0016020(membrane);GO:0016021(integral component of membrane);GO:0022857(transmembrane transporter activity)	ENOG411087W(EamA-like transporter family)	NA	NA	NA	NA(NA)	A0A0D3A764.1 PF00892.18;EamA;
A01	BjuA011934	11326624	11329466	573	G1/G3	unnamed protein product [Brassica oleracea]	-	-	GO:0003674(molecular_function);GO:0008150(biological_process);GO:0009507(chloroplast);GO:0009534(chloroplast thylakoid);GO:0009535(chloroplast thylakoid membrane)	ENOG410YWA9(NA)	-	-	-	-	A0A0D2TB56.1 PF00504.19;Chloroa_b-bind;
A01	BjuA011935	11326294	11326572	279	G1/G3	hypothetical protein BRARA_B01241 [Brassica rapa]	CAS	Exportin-2 OS=Arabidopsis thaliana GN=CAS PE=2 SV=1	GO:0005634(nucleus);GO:0005643(nuclear pore);GO:0005737(cytoplasm);GO:0005829(cytosol);GO:0008536(Ran GTPase binding);GO:0009506(plasmodesma);GO:0009507(chloroplast);GO:0016020(membrane);GO:0030247(polysaccharide binding)	COG5657(Importin)	NA	NA	NA	NA(NA)	M4F3J5.1 PF03378.13;CAS_CSE1;
A01	BjuA011936	11312357	11316287	2493	G1/G3	unnamed protein product [Brassica rapa]	spast	Spastin OS=Danio rerio GN=spast PE=2 SV=2	GO:0005886(plasma membrane);GO:0016887(ATPase activity)	ENOG411055C(ATPase family associated with various cellular activities (AAA))	K03231	elongation factor 1-alpha	-	mtr03013(RNA transport)	F4I5A3.1 PF00004.27;AAA;
A01	BjuA013134	24040563	24045115	1062	G1/G2	hypothetical protein BRARA_D01352, partial [Brassica rapa]	-	-	GO:0003674(molecular_function);GO:0005575(cellular_component);GO:0008150(biological_process)	ENOG410Y65V(Retrotransposon protein)	-	-	-	-	A0A078EIT7.1 PF14111.4;DUF4283;
A01	BjuA013135	24034369	24036345	1977	G1/G2	PREDICTED: pentatricopeptide repeat-containing protein At3g46790, chloroplastic [Brassica rapa]	CRR2	Pentatricopeptide repeat-containing protein At3g46790, chloroplastic OS=Arabidopsis thaliana GN=CRR2 PE=2 SV=1	GO:0003723(RNA binding);GO:0004519(endonuclease activity);GO:0008270(zinc ion binding);GO:0009451(RNA modification);GO:0009507(chloroplast);GO:0031425(chloroplast RNA processing);GO:0031426(polycistronic mRNA processing);GO:0043231(intracellular membrane-bounded organelle)	ENOG410Z7Z7(Pentatricopeptide repeat-containing protein)	NA	NA	NA	NA(NA)	M4EYA9.1 PF14432.4;DYW_deaminase;
A01	BjuA013136	24020730	24022782	1536	G1/G2	PREDICTED: protein plastid transcriptionally active 16, chloroplastic [Brassica rapa]	PTAC16	Protein plastid transcriptionally active 16, chloroplastic OS=Arabidopsis thaliana GN=PTAC16 PE=1 SV=1	GO:0005515(protein binding);GO:0007623(circadian rhythm);GO:0009295(nucleoid);GO:0009507(chloroplast);GO:0009508(plastid chromosome);GO:0009534(chloroplast thylakoid);GO:0009535(chloroplast thylakoid membrane);GO:0009941(chloroplast envelope);GO:0016020(membrane);GO:0042644(chloroplast nucleoid);GO:0098572(stromal side of plastid thylakoid membrane)	COG0702(epimerase dehydratase)	-	-	-	-	A0A078D416.1 PF13460.4;NAD_binding_10;
A01	BjuA013137	23998873	23999859	987	G1/G2	PREDICTED: receptor like protein kinase S.3 [Brassica rapa]	LECRKS3	Receptor like protein kinase S.3 OS=Arabidopsis thaliana GN=LECRKS3 PE=3 SV=1	GO:0004674(protein serine/threonine kinase activity);GO:0005524(ATP binding);GO:0005886(plasma membrane);GO:0006468(protein phosphorylation);GO:0016301(kinase activity);GO:0016310(phosphorylation)	COG0515(Serine Threonine protein kinase)	NA	NA	NA	NA(NA)	M4EYB1.1 PF00069.23;Pkinase;
A01	BjuA013138	23996926	23998305	1026	G1/G2	unnamed protein product [Brassica rapa]	-	-	GO:0003674(molecular_function);GO:0005634(nucleus);GO:0006950(response to stress);GO:0009737(response to abscisic acid)	ENOG410YSJ5(NA)	-	-	-	-	-
A01	BjuA013139	23985795	23986001	207	G1/G2	hypothetical protein BRARA_A02432 [Brassica rapa]	-	-	-	COG0465(Acts as a processive, ATP-dependent zinc metallopeptidase for both cytoplasmic and membrane proteins. Plays a role in the quality control of integral membrane proteins (By similarity))	-	-	-	-	-
A01	BjuA013140	23982535	23984020	1083	G1/G2	unnamed protein product [Brassica rapa]	-	-	GO:0003674(molecular_function);GO:0005634(nucleus);GO:0006950(response to stress);GO:0009737(response to abscisic acid)	ENOG410YSJ5(NA)	-	-	-	-	-
A01	BjuA013141	23964308	23968474	1995	G1/G2	PREDICTED: protein TOC75-3, chloroplastic [Brassica rapa]	TOC75-3	Protein TOC75-3, chloroplastic OS=Arabidopsis thaliana GN=TOC75-3 PE=1 SV=1	GO:0005515(protein binding);GO:0005774(vacuolar membrane);GO:0009507(chloroplast);GO:0009536(plastid);GO:0009658(chloroplast organization);GO:0009735(response to cytokinin);GO:0009941(chloroplast envelope);GO:0010006(Toc complex);GO:0015450(P-P-bond-hydrolysis-driven protein transmembrane transporter activity);GO:0016020(membrane);GO:0031359(integral component of chloroplast outer membrane);GO:00…	COG4775(Gram-negative-bacterium-type cell outer membrane assembly)	NA	NA	NA	NA(NA)	M4DNV8.1 PF01103.21;Bac_surface_Ag;
A01	BjuA033908	37693682	37694917	1236	G1/G2，G1/G3	basic 7S globulin 2-like [Brassica napus]	-	-	GO:0004190(aspartic-type endopeptidase activity);GO:0006508(proteolysis);GO:0030163(protein catabolic process)	ENOG410XNV7(aspartic)	-	-	-	-	M4EZ91.1 PF14543.4;TAXi_N;
A01	BjuA033909	37688259	37688750	492	G1/G2，G1/G3	basic 7S globulin-like [Brassica napus]	-	-	GO:0004190(aspartic-type endopeptidase activity);GO:0006508(proteolysis);GO:0030163(protein catabolic process)	ENOG410XNV7(aspartic)	-	-	-	-	M4EZ91.1 PF14543.4;TAXi_N;
A01	BjuA033910	37650047	37651489	1443	G1/G2	uncharacterized protein LOC106434591 [Brassica napus]	-	-	GO:0016021(integral component of membrane);GO:0016757(transferase activity, transferring glycosyl groups)	COG0438(Glycosyl transferase (Group 1)	-	-	-	-	M4EZ92.1 PF13692.4;Glyco_trans_1_4;
A01	BjuA033911	37643592	37647640	2847	G1/G2	PREDICTED: nuclear pore complex protein NUP1-like isoform X3 [Brassica rapa]	NUP1	Nuclear pore complex protein NUP1 OS=Arabidopsis thaliana GN=NUP1 PE=1 SV=1	GO:0005515(protein binding);GO:0005634(nucleus);GO:0005635(nuclear envelope);GO:0005643(nuclear pore);GO:0005829(cytosol);GO:0006997(nucleus organization);GO:0016973(poly(A)+ mRNA export from nucleus);GO:0034399(nuclear periphery)	ENOG410XPV4(nuclear pore complex protein)	K14317	nuclear pore complex protein Nup214	-	egr03013(RNA transport)	-
A01	BjuA033912	37638983	37640410	1335	G1/G2	BnaA01g31510D [Brassica napus]	-	-	GO:0002213(defense response to insect);GO:0003674(molecular_function);GO:0005737(cytoplasm);GO:0009266(response to temperature stimulus);GO:0016021(integral component of membrane);GO:0097218(sieve plate)	COG0071(response to heat)	-	-	-	-	A0A0D3AEN4.1 PF00011.19;HSP20;
A01	BjuA033913	37631684	37634109	1677	G1/G2	PREDICTED: putative pectinesterase/pectinesterase inhibitor 24 [Brassica rapa]	PME24	Putative pectinesterase/pectinesterase inhibitor 24 OS=Arabidopsis thaliana GN=PME24 PE=3 SV=1	GO:0005618(cell wall);GO:0005739(mitochondrion);GO:0009505(plant-type cell wall);GO:0016021(integral component of membrane);GO:0030599(pectinesterase activity);GO:0042545(cell wall modification);GO:0045330(aspartyl esterase activity);GO:0045490(pectin catabolic process);GO:0046910(pectinesterase inhibitor activity);GO:0071944(cell periphery)	COG4677(pectinesterase)	K01051	pectinesterase	EC:3.1.1.11	thj00040(Pentose and glucuronate interconversions)	M4EZ96.1 PF01095.17;Pectinesterase;
A01	BjuA033914	37627774	37630449	1842	G1/G2	probable pectinesterase/pectinesterase inhibitor 25 isoform X2 [Brassica napus]	PME25	Probable pectinesterase/pectinesterase inhibitor 25 OS=Arabidopsis thaliana GN=PME25 PE=2 SV=1	GO:0005576(extracellular region);GO:0005618(cell wall);GO:0009505(plant-type cell wall);GO:0030599(pectinesterase activity);GO:0042545(cell wall modification);GO:0045330(aspartyl esterase activity);GO:0045490(pectin catabolic process)	COG4677(pectinesterase)	K01051	pectinesterase	EC:3.1.1.11	brp00040(Pentose and glucuronate interconversions)	R0I1C6.1 PF01095.17;Pectinesterase;
A01	BjuA033915	37625986	37626264	279	G1/G2	SUN domain-containing protein 2 [Eutrema salsugineum]	SUN2	Protein SAD1/UNC-84 domain protein 2 OS=Arabidopsis thaliana GN=SUN2 PE=1 SV=1	GO:0005515(protein binding);GO:0005634(nucleus);GO:0005635(nuclear envelope);GO:0005637(nuclear inner membrane);GO:0005783(endoplasmic reticulum);GO:0005789(endoplasmic reticulum membrane);GO:0005819(spindle);GO:0006997(nucleus organization);GO:0009524(phragmoplast);GO:0016021(integral component of membrane);GO:0043495(protein membrane anchor);GO:0043621(protein self-association);GO:0051260(prote…	ENOG410YM6S(nuclear matrix anchoring at nuclear membrane)	NA	NA	NA	NA(NA)	D7L9Q1.1 PF07738.11;Sad1_UNC;
A01	BjuA033916	37618358	37622168	2025	G1/G2	alpha-L-arabinofuranosidase 1 [Brassica napus]	ASD1	Alpha-L-arabinofuranosidase 1 OS=Arabidopsis thaliana GN=ASD1 PE=1 SV=1	GO:0005576(extracellular region);GO:0005773(vacuole);GO:0009044(xylan 1,4-beta-xylosidase activity);GO:0009505(plant-type cell wall);GO:0016798(hydrolase activity, acting on glycosyl bonds);GO:0045493(xylan catabolic process);GO:0046373(L-arabinose metabolic process);GO:0046556(alpha-L-arabinofuranosidase activity);GO:0048046(apoplast)	COG3534(Alpha-N-arabinofuranosidase (EC 3.2.1.55))	K01209	alpha-N-arabinofuranosidase	EC:3.2.1.55	bna00520(Amino sugar and nucleotide sugar metabolism)	V4M991.1 PF06964.10;Alpha-L-AF_C;
A01	BjuA033917	37613785	37614253	171	G1/G2	hypothetical protein DY000_00006332 [Brassica cretica]	-	-	-	-	-	-	-	-	-
A01	BjuA033918	37610802	37611776	975	G1/G2	PREDICTED: transcription factor PCL1-like [Brassica rapa]	LUX	Transcription factor LUX OS=Arabidopsis thaliana GN=LUX PE=1 SV=1	GO:0003677(DNA binding);GO:0003700(DNA binding transcription factor activity);GO:0005634(nucleus);GO:0006351(transcription, DNA-templated);GO:0006355(regulation of transcription, DNA-templated)	ENOG41125WB(Myb-like DNA-binding domain)	K14491	two-component response regulator ARR-B family	-	mis04075(Plant hormone signal transduction)	C1MZ06.1 PF00249.29;Myb_DNA-binding;
A01	BjuA033919	37607800	37609230	1053	G1/G2	unnamed protein product [Brassica rapa]	R3HDM1	R3H domain-containing protein 1 OS=Homo sapiens GN=R3HDM1 PE=1 SV=3	GO:0005737(cytoplasm);GO:0008150(biological_process)	ENOG410ZICF(R3h domain containing)	K02865	large subunit ribosomal protein L10Ae	-	sita03010(Ribosome)	Q9SG83.1 PF01424.20;R3H;
A01	BjuA033920	37605267	37606320	618	G1/G2	PREDICTED: transmembrane emp24 domain-containing protein p24delta6-like [Brassica rapa]	At3g10780	Transmembrane emp24 domain-containing protein p24delta6 OS=Arabidopsis thaliana GN=At3g10780 PE=1 SV=1	GO:0005789(endoplasmic reticulum membrane);GO:0006886(intracellular protein transport);GO:0008320(protein transmembrane transporter activity);GO:0015031(protein transport);GO:0016020(membrane);GO:0016021(integral component of membrane);GO:0016192(vesicle-mediated transport)	ENOG410XTBQ(vesicle-mediated transport)	NA	NA	NA	NA(NA)	V4M986.1 PF01105.22;EMP24_GP25L;
A01	BjuA033921	37601820	37603796	1899	G1/G2	unnamed protein product [Brassica rapa]	BZIP28	bZIP transcription factor 28 OS=Arabidopsis thaliana GN=BZIP28 PE=1 SV=1	GO:0003677(DNA binding);GO:0003700(DNA binding transcription factor activity);GO:0005634(nucleus);GO:0005635(nuclear envelope);GO:0005654(nucleoplasm);GO:0005737(cytoplasm);GO:0005783(endoplasmic reticulum);GO:0006355(regulation of transcription, DNA-templated);GO:0006986(response to unfolded protein);GO:0006990(positive regulation of transcription from RNA polymerase II promoter involved in unfo…	ENOG410XUDS(Transcription factor)	-	-	-	-	A0A078FH26.1 PF00170.19;bZIP_1;
A01	BjuA033922	37599148	37601448	1602	G1/G2	unnamed protein product [Brassica rapa]	-	-	GO:0005634(nucleus);GO:0008270(zinc ion binding)	ENOG41121N2(zinc ion binding)	-	-	-	-	-
A01	BjuA040414	21229308	21230626	1113	G1/G2	hypothetical protein BRARA_A02363 [Brassica rapa]	MPK2	Mitogen-activated protein kinase 2 OS=Arabidopsis thaliana GN=MPK2 PE=1 SV=2	GO:0004672(protein kinase activity);GO:0004707(MAP kinase activity);GO:0005515(protein binding);GO:0005524(ATP binding);GO:0005634(nucleus);GO:0005737(cytoplasm);GO:0006468(protein phosphorylation);GO:0007165(signal transduction);GO:0010468(regulation of gene expression);GO:0016301(kinase activity);GO:0035556(intracellular signal transduction)	ENOG410XNY0(Mitogen-activated protein kinase)	K20535	mitogen-activated protein kinase 1/2	EC:2.7.11.24	brp04016(MAPK signaling pathway - plant)	A0A0J8D3H4.1 PF00069.23;Pkinase;
A01	BjuA040415	21210273	21211521	840	G1/G2	PREDICTED: 40S ribosomal protein S2-2 [Brassica rapa]	RPS2A	40S ribosomal protein S2-1 OS=Arabidopsis thaliana GN=RPS2A PE=2 SV=2	GO:0003723(RNA binding);GO:0003735(structural constituent of ribosome);GO:0005794(Golgi apparatus);GO:0005886(plasma membrane);GO:0006412(translation);GO:0009506(plasmodesma);GO:0009507(chloroplast);GO:0016020(membrane);GO:0022627(cytosolic small ribosomal subunit)	COG0098(Located at the back of the 30S subunit body where it stabilizes the conformation of the head with respect to the body (By similarity))	K02981	small subunit ribosomal protein S2e	-	brp03010(Ribosome)	M0S2A3.1 PF03719.13;Ribosomal_S5_C;
A01	BjuA040416	21196384	21197901	219	G1/G2	hypothetical protein BRARA_A02368 [Brassica rapa]	-	-	-	-	-	-	-	-	-
A01	BjuA040417	21187089	21188100	939	G1/G2	hypothetical protein DY000_00019453 [Brassica cretica]	TPK1	Two-pore potassium channel 1 OS=Arabidopsis thaliana GN=TPK1 PE=1 SV=2	GO:0005216(ion channel activity);GO:0005774(vacuolar membrane);GO:0005887(integral component of plasma membrane);GO:0009705(plant-type vacuole membrane);GO:0010029(regulation of seed germination);GO:0010119(regulation of stomatal movement);GO:0015269(calcium-activated potassium channel activity);GO:0015271(outward rectifier potassium channel activity);GO:0022841(potassium ion leak channel activit…	COG1226(PotAssium voltage-gated channel)	NA	NA	NA	NA(NA)	A0A078I9Q0.1 PF07885.14;Ion_trans_2;
A01	BjuA040418	21150161	21153620	1404	G1/G2	PREDICTED: amino acid permease 1 [Brassica rapa]	AAP1	Amino acid permease 1 OS=Arabidopsis thaliana GN=AAP1 PE=1 SV=1	GO:0005313(L-glutamate transmembrane transporter activity);GO:0005886(plasma membrane);GO:0009624(response to nematode);GO:0015171(amino acid transmembrane transporter activity);GO:0015175(neutral amino acid transmembrane transporter activity);GO:0015180(L-alanine transmembrane transporter activity);GO:0015186(L-glutamine transmembrane transporter activity);GO:0015193(L-proline transmembrane tran…	COG0814(amino acid transport)	NA	NA	NA	NA(NA)	A0A0D3BV01.1 PF01490.16;Aa_trans;
A01	BjuA040419	21136430	21136864	435	G1/G2	hypothetical protein BRARA_G03024 [Brassica rapa]	GLCAT14A	Beta-glucuronosyltransferase GlcAT14A OS=Arabidopsis thaliana GN=GLCAT14A PE=2 SV=1	GO:0005794(Golgi apparatus);GO:0008375(acetylglucosaminyltransferase activity);GO:0016020(membrane);GO:0016021(integral component of membrane);GO:0016051(carbohydrate biosynthetic process);GO:0016757(transferase activity, transferring glycosyl groups)	ENOG410XQ7M(Glucosaminyl (N-acetyl) transferase)	NA	NA	NA	NA(NA)	A0A078E314.1 PF02485.19;Branch;
A01	BjuA040420	21117376	21117930	411	G1/G2	hypothetical protein DY000_00026802 [Brassica cretica]	-	-	GO:0003676(nucleic acid binding);GO:0003964(RNA-directed DNA polymerase activity);GO:0005634(nucleus);GO:0008150(biological_process)	ENOG410Y65V(Retrotransposon protein)	NA	NA	NA	NA(NA)	A0A078EHJ5.1 PF13966.4;zf-RVT;
A01	BjuA040421	21101989	21105902	1023	G1/G2	unnamed protein product [Brassica oleracea]	-	-	-	-	-	-	-	-	A0A0D3DNN8.1 PF03004.12;Transposase_24;
A01	BjuA040452	9421720	9422728	939	G1/G3	hypothetical protein BRARA_A01508 [Brassica rapa]	CHLM	Magnesium protoporphyrin IX methyltransferase, chloroplastic OS=Arabidopsis thaliana GN=CHLM PE=1 SV=1	GO:0005737(cytoplasm);GO:0009507(chloroplast);GO:0009534(chloroplast thylakoid);GO:0009535(chloroplast thylakoid membrane);GO:0009941(chloroplast envelope);GO:0015995(chlorophyll biosynthetic process);GO:0031969(chloroplast membrane);GO:0032259(methylation);GO:0046406(magnesium protoporphyrin IX methyltransferase activity)	COG2227(Non-specific O-methyltransferase that catalyzes the 2 O- methylation steps in the ubiquinone biosynthetic pathway (By similarity))	K03428	magnesium-protoporphyrin O-methyltransferase	EC:2.1.1.11	bna00860(Porphyrin and chlorophyll metabolism)	A0A0D3A658.1 PF07109.9;Mg-por_mtran_C;
A01	BjuA040453	9417652	9421321	2094	G1/G3	PREDICTED: coiled-coil domain-containing protein SCD2 isoform X2 [Brassica rapa]	SCD2	Coiled-coil domain-containing protein SCD2 OS=Arabidopsis thaliana GN=SCD2 PE=1 SV=1	GO:0009507(chloroplast)	ENOG410ZI6D(NA)	-	-	-	-	-
A01	BjuA040454	9413986	9416818	738	G1/G3	PREDICTED: CASP-like protein 1F1 [Brassica rapa]	ARALYDRAFT_492333	CASP-like protein 1F1 OS=Arabidopsis lyrata subsp. lyrata GN=ARALYDRAFT_492333 PE=3 SV=1	GO:0005886(plasma membrane);GO:0016021(integral component of membrane)	ENOG411140T(CASP-like protein)	-	-	-	-	A0A0D3A655.1 PF04535.10;DUF588;
A01	BjuA040455	9406160	9407905	1746	G1/G3	PREDICTED: uncharacterized protein LOC108845678 [Raphanus sativus]	-	-	GO:0005634(nucleus);GO:0008150(biological_process)	ENOG410Y65V(Retrotransposon protein)	NA	NA	NA	NA(NA)	A0A0D3AVF0.1 PF13966.4;zf-RVT;
A01	BjuA040456	9401151	9402352	1017	G1/G3	uncharacterized protein LOC106442480 [Brassica napus]	-	-	GO:0005634(nucleus);GO:0016021(integral component of membrane);GO:0016301(kinase activity);GO:0016310(phosphorylation)	ENOG410XX7Q(NA)	-	-	-	-	-
A01	BjuA040457	9399636	9399987	237	G1/G3	PREDICTED: mitochondrial import inner membrane translocase subunit TIM8-like [Brassica rapa]	TIM8	Mitochondrial import inner membrane translocase subunit TIM8 OS=Arabidopsis thaliana GN=TIM8 PE=1 SV=1	GO:0005739(mitochondrion);GO:0005743(mitochondrial inner membrane);GO:0005758(mitochondrial intermembrane space);GO:0006626(protein targeting to mitochondrion);GO:0009507(chloroplast);GO:0015031(protein transport);GO:0015450(P-P-bond-hydrolysis-driven protein transmembrane transporter activity);GO:0046872(metal ion binding)	ENOG41126D5(mitochondrial intermembrane chaperone that participates in the import and insertion of some multi-pass transmembrane proteins into the mitochondrial inner membrane. Also required for the transfer of beta-barrel precursors from the TOM complex to the sorting and assembly machinery (SAM complex) of the outer membrane. Acts as a chaperone-like protein that protects the hydrophobic precur…	NA	NA	NA	NA(NA)	M4DBJ5.1 PF02953.13;zf-Tim10_DDP;
A01	BjuA040458	9393849	9395477	822	G1/G3	bidirectional sugar transporter SWEET14 [Brassica napus]	SWEET14	Bidirectional sugar transporter SWEET14 OS=Arabidopsis thaliana GN=SWEET14 PE=3 SV=1	GO:0005886(plasma membrane);GO:0005887(integral component of plasma membrane);GO:0006869(lipid transport);GO:0008515(sucrose transmembrane transporter activity);GO:0009901(anther dehiscence);GO:0015770(sucrose transport);GO:0016020(membrane);GO:0016021(integral component of membrane);GO:0051119(sugar transmembrane transporter activity);GO:0080112(seed growth);GO:1905039(carboxylic acid transmembr…	ENOG4111M4R(sugar transporter)	NA	NA	NA	NA(NA)	A0A0D3DFZ0.1 PF03083.14;MtN3_slv;
A01	BjuA040459	9386763	9388407	729	G1/G3	protein TAPETUM DETERMINANT 1-like isoform X2 [Brassica napus]	TPD1	Protein TAPETUM DETERMINANT 1 OS=Arabidopsis thaliana GN=TPD1 PE=1 SV=1	GO:0001709(cell fate determination);GO:0005515(protein binding);GO:0005739(mitochondrion);GO:0048653(anther development)	ENOG410YPRQ(NA)	-	-	-	-	-
A01	BjuA040460	9380739	9384698	2076	G1/G3	protein MICRORCHIDIA 7-like [Brassica napus]	MORC7	Protein MICRORCHIDIA 7 OS=Arabidopsis thaliana GN=MORC7 PE=1 SV=1	GO:0005634(nucleus);GO:0005654(nucleoplasm);GO:0016020(membrane);GO:0043621(protein self-association)	ENOG411033B(MORC family CW-type zinc finger)	-	-	-	-	A0A078H6Y6.1 PF13589.4;HATPase_c_3;
A01	BjuA040461	9375904	9378043	693	G1/G3	unnamed protein product [Brassica oleracea]	HVA22D	HVA22-like protein d OS=Arabidopsis thaliana GN=HVA22D PE=2 SV=1	GO:0003674(molecular_function);GO:0005739(mitochondrion);GO:0009409(response to cold);GO:0009414(response to water deprivation);GO:0009555(pollen development);GO:0009737(response to abscisic acid);GO:0009908(flower development);GO:0010507(negative regulation of autophagy);GO:0016021(integral component of membrane);GO:0042538(hyperosmotic salinity response)	COG5052(receptor accessory protein)	NA	NA	NA	NA(NA)	M4DBJ0.1 PF03134.17;TB2_DP1_HVA22;
A01	BjuA040462	9370182	9372340	966	G1/G3	SUMO-activating enzyme subunit 1A [Brassica napus]	SAE1A	SUMO-activating enzyme subunit 1A OS=Arabidopsis thaliana GN=SAE1A PE=1 SV=1	GO:0005515(protein binding);GO:0005634(nucleus);GO:0005737(cytoplasm);GO:0016925(protein sumoylation);GO:0019948(SUMO activating enzyme activity)	COG0476(small protein activating enzyme activity)	K10684	ubiquitin-like 1-activating enzyme E1 A	EC:6.2.1.45	bna04120(Ubiquitin mediated proteolysis)	A0A078ERU1.1 PF00899.19;ThiF;
A01	BjuA040463	9367770	9368742	732	G1/G3	PREDICTED: thylakoid lumenal 17.9 kDa protein, chloroplastic [Brassica rapa]	At4g24930	Thylakoid lumenal 17.9 kDa protein, chloroplastic OS=Arabidopsis thaliana GN=At4g24930 PE=1 SV=1	GO:0003674(molecular_function);GO:0008150(biological_process);GO:0009507(chloroplast);GO:0009543(chloroplast thylakoid lumen);GO:0009579(thylakoid);GO:0031977(thylakoid lumen)	ENOG4111XR7(thylakoid lumenal 17.9 kDa protein)	-	-	-	-	A0A0B0NLT5.1 PF07386.9;DUF1499;
A01	BjuA040464	9366561	9366968	210	G1/G3	secE/sec61-gamma protein transport protein [Arabidopsis thaliana]	SEC61G1	Protein transport protein Sec61 subunit gamma-1 OS=Arabidopsis thaliana GN=SEC61G1 PE=1 SV=1	GO:0005622(intracellular);GO:0005623(cell);GO:0006605(protein targeting);GO:0006886(intracellular protein transport)	ENOG4111WJ7(protein transport protein sec61)	K07342	protein transport protein SEC61 subunit gamma and related proteins	-	ath03060(Protein export);ath04141(Protein processing in endoplasmic reticulum);ath04145(Phagosome)	M0VP35.1 PF00584.18;SecE;
A01	BjuA040465	9364366	9365292	927	G1/G3	PREDICTED: probable methyltransferase At1g27930 [Brassica rapa]	-	-	GO:0008168(methyltransferase activity);GO:0009507(chloroplast);GO:0032259(methylation);GO:0045492(xylan biosynthetic process)	ENOG410YBH8(Pfam:DUF579)	NA	NA	NA	NA(NA)	A0A078EQQ6.1 PF04669.11;Polysacc_synt_4;
A01	BjuA040466	9362105	9363644	1140	G1/G3	BnaA01g14250D [Brassica napus]	TTL	TITAN-like protein OS=Arabidopsis thaliana GN=TTL PE=2 SV=1	GO:0005634(nucleus);GO:0009793(embryo development ending in seed dormancy);GO:0009960(endosperm development)	ENOG410ZPSB(NA)	-	-	-	-	V4P5N7.1 PF14968.4;CCDC84;
A01	BjuA040467	9357441	9360218	1854	G1/G3	BnaA01g14240D [Brassica napus]	PAP24	Probable inactive purple acid phosphatase 24 OS=Arabidopsis thaliana GN=PAP24 PE=2 SV=1	GO:0003993(acid phosphatase activity);GO:0004722(protein serine/threonine phosphatase activity);GO:0005576(extracellular region);GO:0005618(cell wall);GO:0016311(dephosphorylation);GO:0046872(metal ion binding)	COG1409(Hydrolyzes cAMP to 5'-AMP. Plays an important regulatory role in modulating the intracellular concentration of cAMP, thereby influencing cAMP-dependent processes (By similarity))	NA	NA	NA	NA(NA)	A0A0D3A632.1 PF00149.26;Metallophos;
A01	BjuA040468	9352504	9356531	501	G1/G3	PREDICTED: transcription factor STKL2-like [Brassica rapa]	STKL2	Transcription factor STKL2 OS=Arabidopsis thaliana GN=STKL2 PE=2 SV=1	GO:0005515(protein binding);GO:0005634(nucleus);GO:0006351(transcription, DNA-templated);GO:0006355(regulation of transcription, DNA-templated);GO:0009507(chloroplast);GO:0010629(negative regulation of gene expression);GO:0044212(transcription regulatory region DNA binding);GO:0071333(cellular response to glucose stimulus)	COG2124(Cytochrome p450)	NA	NA	NA	NA(NA)	A0A078H6X2.1 PF04504.12;DUF573;
A01	BjuA040469	9350997	9351609	471	G1/G3	hypothetical protein BRARA_A01488 [Brassica rapa]	At5g25090	Early nodulin-like protein 3 OS=Arabidopsis thaliana GN=At5g25090 PE=1 SV=2	GO:0005507(copper ion binding);GO:0005886(plasma membrane);GO:0009055(electron transfer activity);GO:0009506(plasmodesma);GO:0031225(anchored component of membrane);GO:0046658(anchored component of plasma membrane)	ENOG410YW92(Early nodulin-like protein)	-	-	-	-	A0A078DG41.1 PF02298.15;Cu_bind_like;
A01	BjuA040470	9340727	9342866	1164	G1/G3	PREDICTED: 26S proteasome non-ATPase regulatory subunit 6 homolog [Brassica rapa]	RPN7	26S proteasome non-ATPase regulatory subunit 6 homolog OS=Arabidopsis thaliana GN=RPN7 PE=1 SV=1	GO:0000502(proteasome complex);GO:0005634(nucleus);GO:0005829(cytosol);GO:0005886(plasma membrane);GO:0006511(ubiquitin-dependent protein catabolic process);GO:0008541(proteasome regulatory particle, lid subcomplex);GO:0009507(chloroplast);GO:0016020(membrane);GO:0030163(protein catabolic process);GO:0030234(enzyme regulator activity)	COG5187(Proteasome (Prosome, macropain) 26S subunit, non-ATPase, 6)	K03037	26S proteasome regulatory subunit N7	-	brp03050(Proteasome)	Q93Y35.1 PF10602.7;RPN7;
A01	BjuA040471	9339134	9339862	729	G1/G3	uncharacterized protein LOC106442350 [Brassica napus]	-	-	GO:0005576(extracellular region)	ENOG410Y3ER(Methyltransferase domain)	-	-	-	-	A0A078EN52.1 PF08241.10;Methyltransf_11;
A01	BjuA040472	9327086	9337251	2373	G1/G3	hypothetical protein BRARA_A01482 [Brassica rapa]	At4g24790	Protein STICHEL-like 2 OS=Arabidopsis thaliana GN=At4g24790 PE=2 SV=1	GO:0005634(nucleus)	COG2812(dna polymerase iii subunits gamma and tau)	K10756	replication factor C subunit 3/5	-	ota03030(DNA replication);ota03420(Nucleotide excision repair);ota03430(Mismatch repair)	A0A078EV04.1 PF13177.4;DNA_pol3_delta2;
A01	BjuA040473	9312036	9313583	663	G1/G3	BnaA01g14130D [Brassica napus]	At4g24780	Probable pectate lyase 18 OS=Arabidopsis thaliana GN=At4g24780 PE=2 SV=2	GO:0005576(extracellular region);GO:0009624(response to nematode);GO:0016020(membrane);GO:0016829(lyase activity);GO:0030570(pectate lyase activity);GO:0045490(pectin catabolic process);GO:0046872(metal ion binding)	COG3866(pectate lyase activity)	K01728	pectate lyase	EC:4.2.2.2	bna00040(Pentose and glucuronate interconversions)	A0A061FZK2.1 PF00544.17;Pec_lyase_C;
A01	BjuA040474	9307572	9309442	927	G1/G3	PREDICTED: 31 kDa ribonucleoprotein, chloroplastic [Brassica rapa]	CP31A	31 kDa ribonucleoprotein, chloroplastic OS=Arabidopsis thaliana GN=CP31A PE=1 SV=1	GO:0003723(RNA binding);GO:0003729(mRNA binding);GO:0006396(RNA processing);GO:0006397(mRNA processing);GO:0008266(poly(U) RNA binding);GO:0009409(response to cold);GO:0009451(RNA modification);GO:0009507(chloroplast);GO:0009535(chloroplast thylakoid membrane);GO:0009570(chloroplast stroma);GO:0009579(thylakoid);GO:0009631(cold acclimation);GO:0009941(chloroplast envelope);GO:0016553(base convers…	ENOG4111FDY(Rna-binding protein)	NA	NA	NA	NA(NA)	D7MGN0.1 PF00076.20;RRM_1;
A01	BjuA040475	9297926	9300268	879	G1/G3	PREDICTED: rhodanese-like domain-containing protein 11, chloroplastic [Brassica rapa]	STR11	Rhodanese-like domain-containing protein 11, chloroplastic OS=Arabidopsis thaliana GN=STR11 PE=2 SV=1	GO:0003674(molecular_function);GO:0008150(biological_process);GO:0009507(chloroplast)	ENOG4111H5I(Rhodanese-like domain)	-	-	-	-	M4DBH0.1 PF00581.18;Rhodanese;
A01	BjuA040476	9292709	9293647	939	G1/G3	hypothetical protein BRARA_A01476 [Brassica rapa]	At4g24730	Manganese-dependent ADP-ribose/CDP-alcohol diphosphatase OS=Arabidopsis thaliana GN=At4g24730 PE=2 SV=1	GO:0016787(hydrolase activity)	ENOG410XQF2(CDC-like kinase)	K01517	manganese-dependent ADP-ribose/CDP-alcohol diphosphatase	EC:3.6.1.13 3.6.1.16 3.6.1.53	brp00564(Glycerophospholipid metabolism);brp00230(Purine metabolism)	A0A078H962.1 PF00149.26;Metallophos;
A01	BjuA040717	1765301	1767963	639	G1/G3	unnamed protein product [Brassica rapa]	-	-	GO:0005794(Golgi apparatus);GO:0008150(biological_process);GO:0016021(integral component of membrane);GO:0016787(hydrolase activity)	ENOG410XT9Y(Nodulation protein)	-	-	-	-	A0A078CF61.1 PF00685.25;Sulfotransfer_1;
A01	BjuA040718	1768009	1768516	414	G1/G3	hypothetical protein BRARA_A00377 [Brassica rapa]	-	-	GO:0005794(Golgi apparatus);GO:0008150(biological_process);GO:0016021(integral component of membrane);GO:0016787(hydrolase activity)	ENOG410XT9Y(Nodulation protein)	-	-	-	-	A0A078CF61.1 PF00685.25;Sulfotransfer_1;
A01	BjuA040719	1773549	1776347	2019	G1/G3	hypothetical protein BRARA_A00375 [Brassica rapa]	PERK5	Proline-rich receptor-like protein kinase PERK5 OS=Arabidopsis thaliana GN=PERK5 PE=2 SV=1	GO:0004674(protein serine/threonine kinase activity);GO:0004675(transmembrane receptor protein serine/threonine kinase activity);GO:0005524(ATP binding);GO:0005886(plasma membrane);GO:0007166(cell surface receptor signaling pathway);GO:0016021(integral component of membrane);GO:0016301(kinase activity);GO:0046777(protein autophosphorylation)	COG0515(Serine Threonine protein kinase)	NA	NA	NA	NA(NA)	A0A0D3A201.1 PF07714.15;Pkinase_Tyr;
A01	BjuA040720	1783085	1785174	1134	G1/G3	guanine nucleotide-binding protein subunit beta [Brassica napus]	GB1	Guanine nucleotide-binding protein subunit beta OS=Arabidopsis thaliana GN=GB1 PE=1 SV=1	GO:0000166(nucleotide binding);GO:0003924(GTPase activity);GO:0005515(protein binding);GO:0005634(nucleus);GO:0005737(cytoplasm);GO:0005783(endoplasmic reticulum);GO:0005834(heterotrimeric G-protein complex);GO:0005886(plasma membrane);GO:0007165(signal transduction);GO:0009723(response to ethylene);GO:0009738(abscisic acid-activated signaling pathway);GO:0009788(negative regulation of abscisic a…	ENOG410XQUX(guanine nucleotide binding protein (G protein), beta)	NA	NA	NA	NA(NA)	A0A0D3A1Z9.1 PF00400.30;WD40;
A01	BjuA040721	1785314	1788999	1515	G1/G3	glucan endo-1,3-beta-glucosidase 7 [Brassica napus]	At4g34480	Glucan endo-1,3-beta-glucosidase 7 OS=Arabidopsis thaliana GN=At4g34480 PE=1 SV=2	GO:0004553(hydrolase activity, hydrolyzing O-glycosyl compounds);GO:0005576(extracellular region);GO:0005618(cell wall);GO:0005975(carbohydrate metabolic process);GO:0009507(chloroplast);GO:0042973(glucan endo-1,3-beta-D-glucosidase activity);GO:0071555(cell wall organization)	ENOG410YAGI(glucan endo-1,3-beta-glucosidase)	K19891	glucan endo-1,3-beta-glucosidase 1/2/3	EC:3.2.1.39	lja00500(Starch and sucrose metabolism)	A0A078CF65.1 PF00332.16;Glyco_hydro_17;
A01	BjuA045077	14692464	14695814	2631	G1/G2	hypothetical protein BRARA_A02321 [Brassica rapa]	ATG18H	Autophagy-related protein 18h OS=Arabidopsis thaliana GN=ATG18H PE=2 SV=1	GO:0003674(molecular_function);GO:0005634(nucleus);GO:0005737(cytoplasm);GO:0005774(vacuolar membrane);GO:0006914(autophagy);GO:0015031(protein transport);GO:0016192(vesicle-mediated transport);GO:0034045(phagophore assembly site membrane);GO:0042594(response to starvation)	ENOG410XSW7(Breast carcinoma amplified sequence)	-	-	-	-	M4DXT3.1 PF12490.6;BCAS3;
A01	BjuA045078	14697790	14699361	858	G1/G2	uncharacterized protein BNAANNG09650D [Brassica napus]	-	-	GO:0003743(translation initiation factor activity);GO:0004222(metalloendopeptidase activity);GO:0005524(ATP binding);GO:0005634(nucleus);GO:0006413(translational initiation);GO:0006508(proteolysis);GO:0009507(chloroplast)	ENOG41118FP(NA)	-	-	-	-	-
A01	BjuA045079	14728628	14730091	684	G1/G2	PREDICTED: methyltransferase-like protein 6 [Brassica rapa]	mettl2a	Methyltransferase-like protein 2-A OS=Danio rerio GN=mettl2a PE=2 SV=1	GO:0008168(methyltransferase activity);GO:0016427(tRNA (cytosine) methyltransferase activity);GO:0016740(transferase activity);GO:0032259(methylation)	ENOG411263C(Methyltransferase domain)	NA	NA	NA	NA(NA)	A0A0D3A9T8.1 PF13489.4;Methyltransf_23;
A01	BjuA045080	14747291	14753166	2727	G1/G2	unnamed protein product, partial [Brassica oleracea]	-	-	GO:0003676(nucleic acid binding);GO:0003964(RNA-directed DNA polymerase activity);GO:0005739(mitochondrion);GO:0008150(biological_process)	ENOG410Y65V(Retrotransposon protein)	-	-	-	-	A0A078F952.1 PF14111.4;DUF4283;
A01	BjuA045081	14759816	14760046	231	G1/G2	-	-	-	-	-	-	-	-	-	-
A01	BjuA045082	14802996	14810961	1227	G1/G2	PREDICTED: uncharacterized protein LOC108871405 [Brassica rapa]	-	-	-	COG1599(DNA replication)	K07466	replication factor A1	-	bna03030(DNA replication);bna03420(Nucleotide excision repair);bna03430(Mismatch repair);bna03440(Homologous recombination)	A0A078J4D3.1 PF02721.12;DUF223;
A01	BjuA045108	15327665	15336018	1149	G1/G2	PREDICTED: uncharacterized protein LOC103860066 [Brassica rapa]	CYCB1-4	Cyclin-B1-4 OS=Arabidopsis thaliana GN=CYCB1-4 PE=2 SV=1	GO:0003674(molecular_function);GO:0005634(nucleus);GO:0008150(biological_process);GO:0009506(plasmodesma);GO:0016021(integral component of membrane)	ENOG410XRCG(USO1 vesicle docking protein homolog (yeast))	K03942	NADH dehydrogenase (ubiquinone) flavoprotein 1	EC:1.6.5.3 1.6.99.3	nnu00190(Oxidative phosphorylation)	A0A0D3C4B8.1 PF03732.15;Retrotrans_gag;
A01	BjuA045109	15340055	15342269	1263	G1/G2	hypothetical protein BRARA_A02267 [Brassica rapa]	CRT1	Calreticulin-1 OS=Arabidopsis thaliana GN=CRT1 PE=1 SV=1	GO:0005509(calcium ion binding);GO:0005739(mitochondrion);GO:0005774(vacuolar membrane);GO:0005783(endoplasmic reticulum);GO:0005788(endoplasmic reticulum lumen);GO:0005794(Golgi apparatus);GO:0005829(cytosol);GO:0006457(protein folding);GO:0006979(response to oxidative stress);GO:0009506(plasmodesma);GO:0009507(chloroplast);GO:0009651(response to salt stress);GO:0030246(carbohydrate binding);GO:…	ENOG410XRR7(Calreticulin)	K08057	calreticulin	-	brp04141(Protein processing in endoplasmic reticulum);brp04145(Phagosome)	A0A0D3A9V8.1 PF00262.16;Calreticulin;
A01	BjuA045110	15359808	15360242	435	G1/G2	unnamed protein product [Brassica rapa]	-	-	-	-	-	-	-	-	-
A01	BjuA045111	15369385	15369813	429	G1/G2	probable nicotianamine synthase 4 [Brassica napus]	NAS4	Probable nicotianamine synthase 4 OS=Arabidopsis thaliana GN=NAS4 PE=2 SV=1	GO:0005634(nucleus);GO:0009555(pollen development);GO:0009860(pollen tube growth);GO:0010233(phloem transport);GO:0030410(nicotianamine synthase activity);GO:0030418(nicotianamine biosynthetic process)	ENOG4111NF0(as a sensor for the physiological iron status within the plant, and or might be involved in the transport of iron)	NA	NA	NA	NA(NA)	A0A078HYD7.1 PF03059.14;NAS;
A01	BjuA045112	15393643	15399340	1383	G1/G2	PREDICTED: RNA polymerase II-associated protein 3 isoform X1 [Brassica rapa]	RPAP3	RNA polymerase II-associated protein 3 OS=Homo sapiens GN=RPAP3 PE=1 SV=2	GO:0005515(protein binding);GO:0097255(R2TP complex)	ENOG4111KG3(RNA polymerase II associated protein 3)	NA	NA	NA	NA(NA)	A0A0D3A9W2.1 PF13877.4;RPAP3_C;
A01	BjuA045113	15400974	15406266	930	G1/G2	unnamed protein product, partial [Brassica rapa]	PBG1	Proteasome subunit beta type-4 OS=Arabidopsis thaliana GN=PBG1 PE=1 SV=2	GO:0000502(proteasome complex);GO:0004298(threonine-type endopeptidase activity);GO:0005634(nucleus);GO:0005737(cytoplasm);GO:0005829(cytosol);GO:0005839(proteasome core complex);GO:0006511(ubiquitin-dependent protein catabolic process);GO:0008233(peptidase activity);GO:0009651(response to salt stress);GO:0022626(cytosolic ribosome);GO:0046686(response to cadmium ion);GO:0051603(proteolysis invol…	ENOG410YAMA(The proteasome is a multicatalytic proteinase complex which is characterized by its ability to cleave peptides with Arg, Phe, Tyr, Leu, and Glu adjacent to the leaving group at neutral or slightly basic pH. The proteasome has an ATP-dependent proteolytic activity (By similarity))	K02736	20S proteasome subunit beta 7	EC:3.4.25.1	bna03050(Proteasome)	R0IJB3.1 PF00227.24;Proteasome;
A01	BjuA045114	15414881	15416531	1239	G1/G2	unnamed protein product [Brassica rapa]	-	-	-	ENOG4111IYH(PAPA-1-like family protein zinc finger (HIT type) family protein)	NA	NA	NA	NA(NA)	A0A078HKI0.1 PF04795.10;PAPA-1;
A01	BjuA045115	15419161	15421512	1050	G1/G2	hypothetical protein BRARA_A02274 [Brassica rapa]	PME29	Probable pectinesterase 29 OS=Arabidopsis thaliana GN=PME29 PE=2 SV=1	GO:0005576(extracellular region);GO:0005618(cell wall);GO:0009505(plant-type cell wall);GO:0030599(pectinesterase activity);GO:0042545(cell wall modification);GO:0045330(aspartyl esterase activity);GO:0045490(pectin catabolic process)	COG4677(pectinesterase)	K01051	pectinesterase	EC:3.1.1.11	boe00040(Pentose and glucuronate interconversions)	A0A078HV28.1 PF01095.17;Pectinesterase;
A01	BjuA045116	15427037	15429034	750	G1/G2	hypothetical protein BRARA_H00642, partial [Brassica rapa]	-	-	-	-	-	-	-	-	-
A01	BjuA045302	36712042	36717038	813	G1/G3	BnaA01g29660D [Brassica napus]	CID3	Polyadenylate-binding protein-interacting protein 3 OS=Arabidopsis thaliana GN=CID3 PE=2 SV=1	GO:0010494(cytoplasmic stress granule);GO:0010603(regulation of cytoplasmic mRNA processing body assembly);GO:0034063(stress granule assembly)	COG5180(stress granule assembly)	-	-	-	-	A0A0D3ADS7.1 PF06741.11;LsmAD;
A01	BjuA045303	36720713	36722662	1104	G1/G3	BnaA01g29680D [Brassica napus]	BRXL2	Protein Brevis radix-like 2 OS=Arabidopsis thaliana GN=BRXL2 PE=2 SV=1	GO:0003674(molecular_function);GO:0005634(nucleus);GO:0008150(biological_process)	ENOG4112D19(protein Brevis radix-like)	-	-	-	-	M4DYC9.1 PF08381.9;BRX;
A01	BjuA045304	36723462	36727698	2616	G1/G3	uncharacterized protein LOC106377556 isoform X1 [Brassica napus]	-	-	GO:0003729(mRNA binding);GO:0005634(nucleus);GO:0005829(cytosol);GO:0008150(biological_process)	ENOG410YBXQ(Protein of unknown function (DUF1296))	NA	NA	NA	NA(NA)	M4DYC8.1 PF06972.9;DUF1296;
A01	BjuA045305	36736701	36737903	1203	G1/G3	hypothetical protein DY000_00010698 [Brassica cretica]	At3g13980	Protein BIG GRAIN 1-like A OS=Arabidopsis thaliana GN=At3g13980 PE=3 SV=1	GO:0003674(molecular_function);GO:0005634(nucleus);GO:0009734(auxin-activated signaling pathway)	ENOG410YYWK(NA)	-	-	-	-	-
A01	BjuA045306	36746517	36748095	1155	G1/G3	hypothetical protein BRARA_A03222 [Brassica rapa]	GRF5	Growth-regulating factor 5 OS=Arabidopsis thaliana GN=GRF5 PE=1 SV=1	GO:0005515(protein binding);GO:0005524(ATP binding);GO:0005634(nucleus);GO:0006351(transcription, DNA-templated);GO:0006355(regulation of transcription, DNA-templated);GO:0048366(leaf development)	ENOG410YGVC(growth-regulating factor)	-	-	-	-	A0A078CG27.1 PF08879.8;WRC;
A01	BjuA045307	36756541	36758416	1332	G1/G3	PREDICTED: DNA-directed RNA polymerase I subunit rpa49 [Raphanus sativus]	-	-	GO:0003677(DNA binding);GO:0005634(nucleus)	ENOG410XSWJ(polymerase (RNA) I polypeptide E)	K03005	DNA-directed RNA polymerase I subunit RPA49	-	bna00230(Purine metabolism);bna00240(Pyrimidine metabolism);bna03020(RNA polymerase)	A0A078JM95.1 PF06870.10;RNA_pol_I_A49;
A01	BjuA045308	36760482	36761893	1239	G1/G3	unnamed protein product [Brassica oleracea]	TIF4A-1	Eukaryotic initiation factor 4A-1 OS=Arabidopsis thaliana GN=TIF4A-1 PE=1 SV=1	GO:0003676(nucleic acid binding);GO:0003729(mRNA binding);GO:0003743(translation initiation factor activity);GO:0004004(ATP-dependent RNA helicase activity);GO:0004386(helicase activity);GO:0005524(ATP binding);GO:0005730(nucleolus);GO:0005737(cytoplasm);GO:0005774(vacuolar membrane);GO:0005794(Golgi apparatus);GO:0005829(cytosol);GO:0005886(plasma membrane);GO:0006413(translational initiation);G…	COG0513(purine NTP-dependent helicase activity)	K03257	translation initiation factor 4A	-	bna03013(RNA transport)	P41377.1 PF00270.27;DEAD;
A01	BjuA045309	36762684	36762986	303	G1/G3	hypothetical protein DY000_00005559 [Brassica cretica]	-	-	GO:0003674(molecular_function);GO:0005634(nucleus);GO:0005886(plasma membrane);GO:0008150(biological_process)	ENOG4110859(Domain of unknown function (DUF3511))	-	-	-	-	M4EF26.1 PF12023.6;DUF3511;
A01	BjuA045310	36773234	36773944	711	G1/G3	PREDICTED: transcription factor MYB26-like [Raphanus sativus]	MYB26	Transcription factor MYB26 OS=Arabidopsis thaliana GN=MYB26 PE=2 SV=1	GO:0000981(RNA polymerase II transcription factor activity, sequence-specific DNA binding);GO:0001135(transcription factor activity, RNA polymerase II transcription factor recruiting);GO:0003677(DNA binding);GO:0003700(DNA binding transcription factor activity);GO:0005634(nucleus);GO:0006351(transcription, DNA-templated);GO:0006355(regulation of transcription, DNA-templated);GO:0006357(regulation…	COG5147(Myblike DNAbinding domain containing protein)	NA	NA	NA	NA(NA)	-
A01	BjuA045311	36781221	36783461	2241	G1/G3	BnaA01g29800D [Brassica napus]	PCMP-E89	Pentatricopeptide repeat-containing protein At3g13880 OS=Arabidopsis thaliana GN=PCMP-E89 PE=2 SV=1	GO:0003723(RNA binding);GO:0004519(endonuclease activity);GO:0005739(mitochondrion);GO:0043231(intracellular membrane-bounded organelle);GO:1900864(mitochondrial RNA modification);GO:1900865(chloroplast RNA modification)	ENOG410Z7Z7(Pentatricopeptide repeat-containing protein)	K01176	alpha-amylase	EC:3.2.1.1	jcu00500(Starch and sucrose metabolism)	A0A0E0RBT0.1 PF17177.2;PPR_long;
A01	BjuA045312	36785550	36786908	1359	G1/G3	PREDICTED: polyubiquitin-like [Raphanus sativus]	UBI11	Polyubiquitin OS=Nicotiana sylvestris GN=UBI11 PE=2 SV=1	GO:0005634(nucleus);GO:0005737(cytoplasm);GO:0006464(cellular protein modification process);GO:0007568(aging);GO:0009751(response to salicylic acid)	COG5272(ubiquitin)	NA	NA	NA	NA(NA)	I1I505.1 PF00240.21;ubiquitin;
A01	BjuA045313	36789539	36790324	786	G1/G3	PREDICTED: LOB domain-containing protein 22-like [Brassica oleracea var. oleracea]	LBD22	LOB domain-containing protein 22 OS=Arabidopsis thaliana GN=LBD22 PE=2 SV=1	GO:0005634(nucleus);GO:0008150(biological_process)	ENOG410YPQ9(lob domain-containing protein)	NA	NA	NA	NA(NA)	A0A078EDX3.1 PF03195.12;DUF260;
A01	BjuA045314	36803144	36804406	450	G1/G3	hypothetical protein DY000_00030613 [Brassica cretica]	At3g07690	Glycerol-3-phosphate dehydrogenase [NAD(+)] At3g07690, cytosolic OS=Arabidopsis thaliana GN=At3g07690 PE=3 SV=2	GO:0004367(glycerol-3-phosphate dehydrogenase [NAD+] activity);GO:0005737(cytoplasm);GO:0005975(carbohydrate metabolic process);GO:0006072(glycerol-3-phosphate metabolic process);GO:0009331(glycerol-3-phosphate dehydrogenase complex);GO:0009627(systemic acquired resistance);GO:0046168(glycerol-3-phosphate catabolic process);GO:0051287(NAD binding);GO:0055114(oxidation-reduction process)	COG0240(glycerol-3-phosphate dehydrogenase)	K00006	glycerol-3-phosphate dehydrogenase (NAD+)	EC:1.1.1.8	aly00564(Glycerophospholipid metabolism)	A0A067GU76.1 PF01210.21;NAD_Gly3P_dh_N;
A01	BjuA045315	36806810	36809219	1149	G1/G3	PREDICTED: protein indeterminate-domain 11-like isoform X1 [Brassica rapa]	IDD11	Protein indeterminate-domain 11 OS=Arabidopsis thaliana GN=IDD11 PE=2 SV=1	-	COG5048(Zinc finger protein)	-	-	-	-	-
A01	BjuA045316	36812935	36813105	171	G1/G3	BnaA01g37240D [Brassica napus]	-	-	-	-	-	-	-	-	-
A01	BjuA045317	36820939	36826997	1863	G1/G3	PREDICTED: beta-fructofuranosidase, insoluble isoenzyme CWINV1 [Brassica rapa]	CWINV1	Beta-fructofuranosidase, insoluble isoenzyme CWINV1 OS=Arabidopsis thaliana GN=CWINV1 PE=1 SV=1	GO:0004553(hydrolase activity, hydrolyzing O-glycosyl compounds);GO:0004564(beta-fructofuranosidase activity);GO:0004575(sucrose alpha-glucosidase activity);GO:0005515(protein binding);GO:0005576(extracellular region);GO:0005618(cell wall);GO:0005886(plasma membrane);GO:0005975(carbohydrate metabolic process);GO:0009611(response to wounding);GO:0048046(apoplast);GO:0050832(defense response to fun…	COG1621(Hydrolase)	K01193	beta-fructofuranosidase	EC:3.2.1.26	brp00052(Galactose metabolism);brp00500(Starch and sucrose metabolism)	M4DYB2.1 PF00251.18;Glyco_hydro_32N;
A01	BjuA045318	36827540	36831539	2142	G1/G3	unnamed protein product [Brassica rapa]	BGAL1	Beta-galactosidase 1 OS=Arabidopsis thaliana GN=BGAL1 PE=2 SV=1	GO:0004565(beta-galactosidase activity);GO:0005576(extracellular region);GO:0005618(cell wall);GO:0005773(vacuole);GO:0005829(cytosol);GO:0005975(carbohydrate metabolic process);GO:0009505(plant-type cell wall);GO:0009506(plasmodesma);GO:0030246(carbohydrate binding);GO:0048046(apoplast)	COG1874(beta-galactosidase)	K12309	beta-galactosidase	EC:3.2.1.23	brp00052(Galactose metabolism);brp00600(Sphingolipid metabolism);brp00531(Glycosaminoglycan degradation);brp00604(Glycosphingolipid biosynthesis - ganglio series);brp00511(Other glycan degradation)	M4DYB0.1 PF01301.17;Glyco_hydro_35;
A01	BjuA045319	36843754	36846355	1425	G1/G3	PREDICTED: 3-epi-6-deoxocathasterone 23-monooxygenase isoform X2 [Brassica rapa]	CYP90D1	3-epi-6-deoxocathasterone 23-monooxygenase OS=Arabidopsis thaliana GN=CYP90D1 PE=2 SV=1	GO:0005506(iron ion binding);GO:0005789(endoplasmic reticulum membrane);GO:0009507(chloroplast);GO:0010268(brassinosteroid homeostasis);GO:0016021(integral component of membrane);GO:0016125(sterol metabolic process);GO:0016132(brassinosteroid biosynthetic process);GO:0016709(oxidoreductase activity, acting on paired donors, with incorporation or reduction of molecular oxygen, NAD(P)H as one donor…	COG2124(Cytochrome p450)	K12638	3-epi-6-deoxocathasterone 23-monooxygenase	EC:1.14.13.112	bna00905(Brassinosteroid biosynthesis)	A0A078IP80.1 PF00067.20;p450;
A01	BjuA045320	36848290	36848835	546	G1/G3	unnamed protein product [Brassica rapa]	PRA1F3	PRA1 family protein F3 OS=Arabidopsis thaliana GN=PRA1F3 PE=1 SV=1	GO:0003674(molecular_function);GO:0005783(endoplasmic reticulum);GO:0005789(endoplasmic reticulum membrane);GO:0009507(chloroplast);GO:0016021(integral component of membrane);GO:0016192(vesicle-mediated transport)	COG5130(Prenylated RAB acceptor)	NA	NA	NA	NA(NA)	M4DYA8.1 PF03208.17;PRA1;
A01	BjuA045321	36849753	36850376	624	G1/G3	unnamed protein product [Brassica rapa]	PRA1F3	PRA1 family protein F3 OS=Arabidopsis thaliana GN=PRA1F3 PE=1 SV=1	GO:0003674(molecular_function);GO:0005783(endoplasmic reticulum);GO:0005789(endoplasmic reticulum membrane);GO:0009507(chloroplast);GO:0016021(integral component of membrane);GO:0016192(vesicle-mediated transport)	COG5130(Prenylated RAB acceptor)	NA	NA	NA	NA(NA)	M4DYA7.1 PF03208.17;PRA1;
A01	BjuA045322	36852107	36852748	642	G1/G3	hypothetical protein BRARA_A03239 [Brassica rapa]	PRA1F3	PRA1 family protein F3 OS=Arabidopsis thaliana GN=PRA1F3 PE=1 SV=1	GO:0003674(molecular_function);GO:0005783(endoplasmic reticulum);GO:0005789(endoplasmic reticulum membrane);GO:0009507(chloroplast);GO:0016021(integral component of membrane);GO:0016192(vesicle-mediated transport)	COG5130(Prenylated RAB acceptor)	NA	NA	NA	NA(NA)	A0A0D3ADW2.1 PF03208.17;PRA1;
A01	BjuA045323	36854706	36857579	2259	G1/G3	inactive protein kinase SELMODRAFT_444075-like [Brassica napus]	SELMODRAFT_444075	Inactive protein kinase SELMODRAFT_444075 OS=Selaginella moellendorffii GN=SELMODRAFT_444075 PE=2 SV=1	GO:0004674(protein serine/threonine kinase activity);GO:0005524(ATP binding);GO:0005886(plasma membrane);GO:0016301(kinase activity);GO:0016787(hydrolase activity);GO:0046777(protein autophosphorylation)	COG0515(Serine Threonine protein kinase)	NA	NA	NA	NA(NA)	A0A078IP76.1 PF00069.23;Pkinase;
A01	BjuA045324	36864843	36867120	2196	G1/G3	PREDICTED: lysine-specific histone demethylase 1 homolog 2 [Brassica rapa]	LDL2	Lysine-specific histone demethylase 1 homolog 2 OS=Arabidopsis thaliana GN=LDL2 PE=2 SV=1	GO:0003677(DNA binding);GO:0005515(protein binding);GO:0005739(mitochondrion);GO:0006351(transcription, DNA-templated);GO:0006355(regulation of transcription, DNA-templated);GO:0008131(primary amine oxidase activity);GO:0016491(oxidoreductase activity);GO:0051568(histone H3-K4 methylation);GO:0055114(oxidation-reduction process)	ENOG410XSNC(amine oxidase)	NA	NA	NA	NA(NA)	A0A078IP37.1 PF01593.22;Amino_oxidase;
A01	BjuA045325	36877016	36880619	1782	G1/G3	casein kinase 1-like protein HD16 [Brassica napus]	HD16	Casein kinase 1-like protein HD16 OS=Oryza sativa subsp. japonica GN=HD16 PE=1 SV=1	GO:0004674(protein serine/threonine kinase activity);GO:0005515(protein binding);GO:0005524(ATP binding);GO:0005634(nucleus);GO:0016301(kinase activity);GO:0048574(long-day photoperiodism, flowering);GO:1990164(histone H2A phosphorylation)	ENOG410XPGP(Casein Kinase)	NA	NA	NA	NA(NA)	A0A0D3ADW6.1 PF00069.23;Pkinase;
A01	BjuA045326	36883472	36884026	555	G1/G3	PREDICTED: dirigent protein 3 [Brassica rapa]	DIR3	Dirigent protein 3 OS=Arabidopsis thaliana GN=DIR3 PE=3 SV=1	GO:0006952(defense response);GO:0009507(chloroplast);GO:0009699(phenylpropanoid biosynthetic process);GO:0009807(lignan biosynthetic process);GO:0016853(isomerase activity);GO:0048046(apoplast)	-	K01870	isoleucyl-tRNA synthetase	EC:6.1.1.5	csat00970(Aminoacyl-tRNA biosynthesis)	A0A078JZ15.1 PF03018.12;Dirigent;
A01	BjuA045327	36888810	36889361	552	G1/G3	BnaA01g37260D [Brassica napus]	DIR20	Dirigent protein 20 OS=Arabidopsis thaliana GN=DIR20 PE=2 SV=1	GO:0005576(extracellular region);GO:0006952(defense response);GO:0009807(lignan biosynthetic process);GO:0016853(isomerase activity);GO:0048046(apoplast)	ENOG410ZQVA(Disease resistance response)	K01870	isoleucyl-tRNA synthetase	EC:6.1.1.5	csat00970(Aminoacyl-tRNA biosynthesis)	M4DYA0.1 PF03018.12;Dirigent;
A01	BjuA045328	36891297	36891854	558	G1/G3	PREDICTED: dirigent protein 22-like [Brassica rapa]	DIR20	Dirigent protein 20 OS=Arabidopsis thaliana GN=DIR20 PE=2 SV=1	GO:0005576(extracellular region);GO:0006952(defense response);GO:0009807(lignan biosynthetic process);GO:0016853(isomerase activity);GO:0048046(apoplast)	-	K01870	isoleucyl-tRNA synthetase	EC:6.1.1.5	eus00970(Aminoacyl-tRNA biosynthesis)	A0A0D3ADX2.1 PF03018.12;Dirigent;
A01	BjuA045329	36895163	36897616	1812	G1/G3	PREDICTED: ABC transporter E family member 1 [Brassica rapa]	ABCE1	ABC transporter E family member 1 OS=Arabidopsis thaliana GN=ABCE1 PE=2 SV=1	GO:0000054(ribosomal subunit export from nucleus);GO:0005215(transporter activity);GO:0005506(iron ion binding);GO:0005524(ATP binding);GO:0005852(eukaryotic translation initiation factor 3 complex);GO:0006413(translational initiation);GO:0006415(translational termination);GO:0006810(transport);GO:0016020(membrane);GO:0016887(ATPase activity);GO:0043024(ribosomal small subunit binding);GO:0051539…	COG1245(ATP-binding cassette, sub-family E)	NA	NA	NA	NA(NA)	A0A0D3ADX4.1 PF00005.25;ABC_tran;
A01	BjuA045330	36902761	36905100	561	G1/G3	BnaA01g37300D [Brassica napus]	-	-	GO:0003674(molecular_function);GO:0005737(cytoplasm);GO:0008150(biological_process)	ENOG41108DY(NA)	-	-	-	-	-
A01	BjuA045331	36908517	36909951	1083	G1/G3	BnaA01g37310D [Brassica napus]	F6'H1	Feruloyl CoA ortho-hydroxylase 1 OS=Arabidopsis thaliana GN=F6'H1 PE=1 SV=1	GO:0005737(cytoplasm);GO:0009699(phenylpropanoid biosynthetic process);GO:0009805(coumarin biosynthetic process);GO:0010421(hydrogen peroxide-mediated programmed cell death);GO:0016706(oxidoreductase activity, acting on paired donors, with incorporation or reduction of molecular oxygen, 2-oxoglutarate as one donor, and incorporation of one atom each of oxygen into both donors);GO:0019748(secondar…	COG3491(2OGFe(II) oxygenase)	K06892	feruloyl-CoA ortho-hydroxylase	EC:1.14.11.-	bna00940(Phenylpropanoid biosynthesis)	A0A087H9A4.1 PF14226.4;DIOX_N;
A01	BjuA045332	36911611	36913785	1758	G1/G3	unnamed protein product [Brassica rapa]	IQM2	IQ domain-containing protein IQM2 OS=Arabidopsis thaliana GN=IQM2 PE=2 SV=1	GO:0005516(calmodulin binding);GO:0005634(nucleus);GO:0005737(cytoplasm);GO:0008150(biological_process)	ENOG410XYNX(Calmodulin-binding)	K01214	isoamylase	EC:3.2.1.68	vra00500(Starch and sucrose metabolism)	-
A01	BjuA045333	36930956	36931231	276	G1/G3	hypothetical protein BRARA_A03252 [Brassica rapa]	-	-	-	-	-	-	-	-	-
A01	BjuA045334	36932936	36934548	1464	G1/G3	hypothetical protein BRARA_A03253 [Brassica rapa]	CYP51G1	Sterol 14-demethylase OS=Arabidopsis thaliana GN=CYP51G1 PE=1 SV=1	GO:0005506(iron ion binding);GO:0005576(extracellular region);GO:0005783(endoplasmic reticulum);GO:0005794(Golgi apparatus);GO:0005886(plasma membrane);GO:0008168(methyltransferase activity);GO:0008398(sterol 14-demethylase activity);GO:0009793(embryo development ending in seed dormancy);GO:0016021(integral component of membrane);GO:0016126(sterol biosynthetic process);GO:0016491(oxidoreductase a…	COG2124(Cytochrome p450)	K05917	sterol 14-demethylase	EC:1.14.13.70	brp00100(Steroid biosynthesis)	A0A0D2ZSV9.1 PF00067.20;p450;
A01	BjuA045335	36949607	36951469	792	G1/G3	hypothetical protein BRARA_A03254 [Brassica rapa]	SCL30A	Serine/arginine-rich SC35-like splicing factor SCL30A OS=Arabidopsis thaliana GN=SCL30A PE=1 SV=1	GO:0000398(mRNA splicing, via spliceosome);GO:0003723(RNA binding);GO:0003729(mRNA binding);GO:0005515(protein binding);GO:0005634(nucleus);GO:0005681(spliceosomal complex);GO:0005829(cytosol);GO:0008380(RNA splicing);GO:0016607(nuclear speck)	ENOG4111J16(serine arginine-rich splicing factor)	K12900	FUS-interacting serine-arginine-rich protein 1	-	bna03040(Spliceosome)	M4FE73.1 PF00076.20;RRM_1;
A01	BjuA045336	36954232	36955516	753	G1/G3	transcription repressor MYB5 [Brassica napus]	MYB5	Transcription repressor MYB5 OS=Arabidopsis thaliana GN=MYB5 PE=1 SV=1	GO:0000981(RNA polymerase II transcription factor activity, sequence-specific DNA binding);GO:0001135(transcription factor activity, RNA polymerase II transcription factor recruiting);GO:0003677(DNA binding);GO:0003700(DNA binding transcription factor activity);GO:0005634(nucleus);GO:0006351(transcription, DNA-templated);GO:0006355(regulation of transcription, DNA-templated);GO:0006357(regulation…	COG5147(Myblike DNAbinding domain containing protein)	NA	NA	NA	NA(NA)	D7L1F4.1 PF00249.29;Myb_DNA-binding;
A01	BjuA045337	36957005	36965943	4203	G1/G3	MAP3K epsilon protein kinase 1-like isoform X2 [Brassica napus]	M3KE1	MAP3K epsilon protein kinase 1 OS=Arabidopsis thaliana GN=M3KE1 PE=1 SV=1	GO:0004674(protein serine/threonine kinase activity);GO:0005515(protein binding);GO:0005524(ATP binding);GO:0005730(nucleolus);GO:0005815(microtubule organizing center);GO:0005829(cytosol);GO:0005886(plasma membrane);GO:0007009(plasma membrane organization);GO:0007049(cell cycle);GO:0007346(regulation of mitotic cell cycle);GO:0009555(pollen development);GO:0016301(kinase activity);GO:0023014(sig…	ENOG410XQGS(mitogen-activated protein kinase kinase kinase)	K00384	thioredoxin reductase (NADPH)	EC:1.8.1.9	brp00450(Selenocompound metabolism)	A0A0D3ADZ0.1 PF00069.23;Pkinase;
A01	BjuA045338	36973606	36974013	408	G1/G3	unnamed protein product [Brassica rapa]	-	-	GO:0003674(molecular_function);GO:0005634(nucleus);GO:0008150(biological_process)	ENOG410ZGFD(NA)	-	-	-	-	-
A01	BjuA045339	36975977	36978671	1896	G1/G3	unnamed protein product [Brassica rapa]	YTHDF2	YTH domain-containing family protein 2 OS=Bos taurus GN=YTHDF2 PE=2 SV=1	GO:0003723(RNA binding);GO:0003729(mRNA binding);GO:0005515(protein binding);GO:0005634(nucleus);GO:0005737(cytoplasm);GO:0005829(cytosol)	ENOG410YABQ(YTH domain family)	NA	NA	NA	NA(NA)	M4EF70.1 PF04146.13;YTH;
A01	BjuA045340	36979599	36980345	747	G1/G3	hypothetical protein BRARA_A03259 [Brassica rapa]	N6AMT1	HemK methyltransferase family member 2 OS=Homo sapiens GN=N6AMT1 PE=1 SV=3	GO:0003676(nucleic acid binding);GO:0005737(cytoplasm);GO:0008276(protein methyltransferase activity)	COG2890(Methylates the class 1 translation termination release factors RF1 PrfA and RF2 PrfB on the glutamine residue of the universally conserved GGQ motif (By similarity))	NA	NA	NA	NA(NA)	M4EF73.1 PF05175.12;MTS;
A01	BjuA045341	36982357	36982578	222	G1/G3	PREDICTED: protein RALF-like 10 [Brassica rapa]	RALFL26	Protein RALF-like 26 OS=Arabidopsis thaliana GN=RALFL26 PE=3 SV=1	GO:0005576(extracellular region);GO:0007267(cell-cell signaling);GO:0009506(plasmodesma);GO:0019722(calcium-mediated signaling);GO:0048046(apoplast)	ENOG41108F5(Rapid ALkalinization Factor (RALF) )	-	-	-	-	M4FE82.1 PF05498.9;RALF;
A01	BjuA045342	37652681	37655908	1893	G1/G2	glycerol-3-phosphate dehydrogenase SDP6, mitochondrial-like [Brassica napus]	SDP6	Glycerol-3-phosphate dehydrogenase SDP6, mitochondrial OS=Arabidopsis thaliana GN=SDP6 PE=1 SV=1	GO:0004368(glycerol-3-phosphate dehydrogenase activity);GO:0005739(mitochondrion);GO:0005743(mitochondrial inner membrane);GO:0006071(glycerol metabolic process);GO:0006127(glycerophosphate shuttle);GO:0009331(glycerol-3-phosphate dehydrogenase complex);GO:0019563(glycerol catabolic process);GO:0052591(sn-glycerol-3-phosphate:ubiquinone-8 oxidoreductase activity)	COG0578(glycerol-3-phosphate dehydrogenase)	K00111	glycerol-3-phosphate dehydrogenase	EC:1.1.5.3	bna00564(Glycerophospholipid metabolism)	M4EM13.1 PF01266.22;DAO;
A01	BjuA045343	37664293	37665684	645	G1/G2	hypothetical protein BRARA_A03490 [Brassica rapa]	SEC8	Exocyst complex component SEC8 OS=Arabidopsis thaliana GN=SEC8 PE=1 SV=1	GO:0000145(exocyst);GO:0005618(cell wall);GO:0005634(nucleus);GO:0005829(cytosol);GO:0005856(cytoskeleton);GO:0005886(plasma membrane);GO:0006612(protein targeting to membrane);GO:0006887(exocytosis);GO:0006893(Golgi to plasma membrane transport);GO:0006903(vesicle targeting);GO:0006904(vesicle docking involved in exocytosis);GO:0009506(plasmodesma);GO:0009524(phragmoplast);GO:0009846(pollen germ…	ENOG410Z8N0(Exocyst complex component)	NA	NA	NA	NA(NA)	D7L8Y1.1 PF04048.12;Sec8_exocyst;
A01	BjuA045344	37666808	37669510	1530	G1/G2	serine carboxypeptidase-like 49 [Brassica napus]	SCPL49	Serine carboxypeptidase-like 49 OS=Arabidopsis thaliana GN=SCPL49 PE=2 SV=2	GO:0004185(serine-type carboxypeptidase activity);GO:0005576(extracellular region);GO:0005773(vacuole);GO:0005829(cytosol);GO:0006508(proteolysis);GO:0051603(proteolysis involved in cellular protein catabolic process)	ENOG410Z8N0(Exocyst complex component)	NA	NA	NA	NA(NA)	M4EZ67.1 PF00450.20;Peptidase_S10;
A01	BjuA045345	37677574	37678728	1155	G1/G2，G1/G3	PREDICTED: zinc finger protein ZAT5-like [Brassica rapa]	ZAT5	Zinc finger protein ZAT5 OS=Arabidopsis thaliana GN=ZAT5 PE=2 SV=1	GO:0003676(nucleic acid binding);GO:0003700(DNA binding transcription factor activity);GO:0005634(nucleus);GO:0006355(regulation of transcription, DNA-templated);GO:0008270(zinc ion binding);GO:0009555(pollen development)	COG5048(Zinc finger protein)	-	-	-	-	V4M2I5.1 PF13912.4;zf-C2H2_6;
A01	BjuA045346	37684900	37686938	1029	G1/G2，G1/G3	NAC domain-containing protein 13 isoform X1 [Brassica napus]	NAC078	NAC domain-containing protein 78 OS=Arabidopsis thaliana GN=NAC078 PE=2 SV=2	GO:0000976(transcription regulatory region sequence-specific DNA binding);GO:0002237(response to molecule of bacterial origin);GO:0003677(DNA binding);GO:0003700(DNA binding transcription factor activity);GO:0005515(protein binding);GO:0005634(nucleus);GO:0005730(nucleolus);GO:0006351(transcription, DNA-templated);GO:0006355(regulation of transcription, DNA-templated);GO:0006952(defense response)…	ENOG41114MP(NAC domain containing protein)	K03094	S-phase kinase-associated protein 1	-	lja04141(Protein processing in endoplasmic reticulum);lja04120(Ubiquitin mediated proteolysis)	R0FD08.1 PF02365.13;NAM;
A02	BjuA000014	10061331	10062783	219	G1/G2	PREDICTED: peroxiredoxin-2B-like [Brassica rapa]	PRXIIB	Peroxiredoxin-2B OS=Arabidopsis thaliana GN=PRXIIB PE=1 SV=1	GO:0004601(peroxidase activity);GO:0005737(cytoplasm);GO:0005829(cytosol);GO:0005886(plasma membrane);GO:0009507(chloroplast);GO:0016020(membrane);GO:0016209(antioxidant activity);GO:0045454(cell redox homeostasis);GO:0046686(response to cadmium ion);GO:0051920(peroxiredoxin activity);GO:0055114(oxidation-reduction process)	COG0678(peroxiredoxin)	NA	NA	NA	NA(NA)	A0A087HFY2.1 PF08534.8;Redoxin;
A02	BjuA000173	24403737	24404517	279	G1/G3	BnaA02g36780D [Brassica napus]	-	-	-	-	-	-	-	-	-
A02	BjuA000174	24425410	24426054	645	G1/G3	PREDICTED: uncharacterized protein LOC108846590 [Raphanus sativus]	-	-	GO:0003676(nucleic acid binding);GO:0003723(RNA binding);GO:0003964(RNA-directed DNA polymerase activity);GO:0005575(cellular_component);GO:0006278(RNA-dependent DNA biosynthetic process);GO:0015074(DNA integration)	COG2801(Retrotransposon protein)	NA	NA	NA	NA(NA)	W9RG11.1 PF00385.22;Chromo;
A02	BjuA000175	24433299	24437033	1479	G1/G3	PREDICTED: aluminum-activated malate transporter 13 [Brassica rapa]	ALMT13	Aluminum-activated malate transporter 13 OS=Arabidopsis thaliana GN=ALMT13 PE=2 SV=1	GO:0005886(plasma membrane);GO:0016021(integral component of membrane)	ENOG410XR8V(aluminum-activated malate transporter)	NA	NA	NA	NA(NA)	A0A078J5L9.1 PF11744.6;ALMT;
A02	BjuA000176	24449035	24449265	231	G1/G3	PREDICTED: protein CLT3, chloroplastic [Brassica oleracea var. oleracea]	CLT3	Protein CLT3, chloroplastic OS=Arabidopsis thaliana GN=CLT3 PE=2 SV=1	GO:0002229(defense response to oomycetes);GO:0009507(chloroplast);GO:0009536(plastid);GO:0016021(integral component of membrane);GO:0031969(chloroplast membrane);GO:0034635(glutathione transport);GO:0046686(response to cadmium ion)	ENOG4111Y30(crt homolog 1-like)	-	-	-	-	-
A02	BjuA005543	14508351	14512091	3015	G1/G2	hypothetical protein BRARA_B02109 [Brassica rapa]	LNG1	Protein LONGIFOLIA 1 OS=Arabidopsis thaliana GN=LNG1 PE=1 SV=1	GO:0003674(molecular_function);GO:0005634(nucleus);GO:0009506(plasmodesma);GO:0051513(regulation of monopolar cell growth)	ENOG410Z09A(NA)	-	-	-	-	A0A078I059.1 PF14309.4;DUF4378;
A02	BjuA005544	14484729	14507655	9216	G1/G2	unnamed protein product [Brassica rapa]	At1g74360	Probable LRR receptor-like serine/threonine-protein kinase At1g74360 OS=Arabidopsis thaliana GN=At1g74360 PE=1 SV=1	GO:0007165(signal transduction);GO:0016021(integral component of membrane)	COG4886(leucine Rich Repeat)	-	-	-	-	M4CV92.1 PF08263.10;LRRNT_2;
A02	BjuA006856	7712400	7715234	2106	G1/G2	PREDICTED: autophagy-related protein 18f [Brassica rapa]	ATG18F	Autophagy-related protein 18f OS=Arabidopsis thaliana GN=ATG18F PE=2 SV=1	GO:0003674(molecular_function);GO:0005737(cytoplasm);GO:0005774(vacuolar membrane);GO:0006914(autophagy);GO:0015031(protein transport);GO:0016192(vesicle-mediated transport);GO:0034045(phagophore assembly site membrane);GO:0042594(response to starvation)	ENOG410XSW7(Breast carcinoma amplified sequence)	-	-	-	-	M4E1U1.1 PF12490.6;BCAS3;
A02	BjuA006857	7719838	7721332	984	G1/G2	unnamed protein product [Brassica rapa]	GAUT12	Probable galacturonosyltransferase 12 OS=Arabidopsis thaliana GN=GAUT12 PE=2 SV=1	GO:0000139(Golgi membrane);GO:0005794(Golgi apparatus);GO:0010413(glucuronoxylan metabolic process);GO:0010417(glucuronoxylan biosynthetic process);GO:0016021(integral component of membrane);GO:0016051(carbohydrate biosynthetic process);GO:0016757(transferase activity, transferring glycosyl groups);GO:0016758(transferase activity, transferring hexosyl groups);GO:0045489(pectin biosynthetic proces…	ENOG410Y9J4(Galacturonosyltransferase)	NA	NA	NA	NA(NA)	M4E1T9.1 PF01501.18;Glyco_transf_8;
A02	BjuA006858	7721357	7721893	447	G1/G2	unnamed protein product [Brassica rapa]	GAUT12	Probable galacturonosyltransferase 12 OS=Arabidopsis thaliana GN=GAUT12 PE=2 SV=1	GO:0000139(Golgi membrane);GO:0005794(Golgi apparatus);GO:0010413(glucuronoxylan metabolic process);GO:0010417(glucuronoxylan biosynthetic process);GO:0016021(integral component of membrane);GO:0016051(carbohydrate biosynthetic process);GO:0016757(transferase activity, transferring glycosyl groups);GO:0016758(transferase activity, transferring hexosyl groups);GO:0045489(pectin biosynthetic proces…	ENOG410Y9J4(Galacturonosyltransferase)	NA	NA	NA	NA(NA)	M4E1T9.1 PF01501.18;Glyco_transf_8;
A02	BjuA006859	7722366	7723273	594	G1/G2	BnaA02g09500D [Brassica napus]	ILR3	Transcription factor ILR3 OS=Arabidopsis thaliana GN=ILR3 PE=1 SV=1	GO:0003677(DNA binding);GO:0003700(DNA binding transcription factor activity);GO:0005515(protein binding);GO:0005634(nucleus);GO:0006351(transcription, DNA-templated);GO:0006355(regulation of transcription, DNA-templated);GO:0019760(glucosinolate metabolic process);GO:0043565(sequence-specific DNA binding);GO:0046983(protein dimerization activity)	ENOG4111M4Q(Transcription factor)	-	-	-	-	M4EJP5.1 PF00010.24;HLH;
A02	BjuA006860	7729820	7734156	2253	G1/G2	unnamed protein product [Brassica rapa]	KIN14N	Kinesin-like protein KIN-14N OS=Arabidopsis thaliana GN=KIN14N PE=1 SV=1	GO:0003777(microtubule motor activity);GO:0005524(ATP binding);GO:0005737(cytoplasm);GO:0005871(kinesin complex);GO:0005874(microtubule);GO:0007018(microtubule-based movement);GO:0008017(microtubule binding);GO:0016887(ATPase activity)	COG5059(Kinesin family member)	NA	NA	NA	NA(NA)	A0A078JM03.1 PF00225.21;Kinesin;
A02	BjuA006861	7750061	7751005	555	G1/G2	PREDICTED: 21.7 kDa class VI heat shock protein [Brassica rapa]	HSP21.7	21.7 kDa class VI heat shock protein OS=Arabidopsis thaliana GN=HSP21.7 PE=2 SV=1	GO:0003674(molecular_function);GO:0005737(cytoplasm);GO:0008150(biological_process)	ENOG410YHRU(kDa class VI heat shock)	K13993	HSP20 family protein	-	ccaj04141(Protein processing in endoplasmic reticulum)	M4E1T6.1 PF00011.19;HSP20;
A02	BjuA006862	7759448	7761279	1419	G1/G2	unnamed protein product [Brassica rapa]	-	-	GO:0003676(nucleic acid binding);GO:0003700(DNA binding transcription factor activity);GO:0005634(nucleus);GO:0006355(regulation of transcription, DNA-templated)	ENOG41122MS(- C2H2 zinc finger protein, expressed)	-	-	-	-	-
A02	BjuA006863	7765689	7766006	318	G1/G2	unnamed protein product [Brassica rapa]	CRLK1	Calcium/calmodulin-regulated receptor-like kinase 1 OS=Arabidopsis thaliana GN=CRLK1 PE=1 SV=1	GO:0004672(protein kinase activity);GO:0004674(protein serine/threonine kinase activity);GO:0005515(protein binding);GO:0005516(calmodulin binding);GO:0005524(ATP binding);GO:0005886(plasma membrane);GO:0006468(protein phosphorylation);GO:0009409(response to cold);GO:0009631(cold acclimation);GO:0010008(endosome membrane);GO:0016021(integral component of membrane)	COG0515(Serine Threonine protein kinase)	NA	NA	NA	NA(NA)	M4EJQ2.1 PF07714.15;Pkinase_Tyr;
A02	BjuA006864	7766930	7767139	210	G1/G2	unnamed protein product [Brassica rapa]	-	-	GO:0003674(molecular_function);GO:0005739(mitochondrion);GO:0008150(biological_process)	-	-	-	-	-	-
A02	BjuA006865	7779524	7780048	525	G1/G2	unnamed protein product [Brassica rapa]	-	-	-	-	-	-	-	-	-
A02	BjuA006866	7788098	7788622	525	G1/G2	unnamed protein product [Brassica rapa]	-	-	-	-	-	-	-	-	-
A02	BjuA006867	7795749	7795958	210	G1/G2	hypothetical protein BRARA_B01372 [Brassica rapa]	-	-	GO:0003674(molecular_function);GO:0008150(biological_process)	ENOG410YZ19(NA)	-	-	-	-	-
A02	BjuA006868	7819719	7821924	1839	G1/G2	PREDICTED: indole-3-acetic acid-amido synthetase GH3.6 [Brassica rapa]	GH3.6	Indole-3-acetic acid-amido synthetase GH3.6 OS=Arabidopsis thaliana GN=GH3.6 PE=1 SV=1	GO:0005737(cytoplasm);GO:0009507(chloroplast);GO:0009733(response to auxin);GO:0009734(auxin-activated signaling pathway);GO:0009826(unidimensional cell growth);GO:0010252(auxin homeostasis);GO:0010279(indole-3-acetic acid amido synthetase activity)	ENOG410XT6V(Indole-3-acetic acid-amido synthetase)	K14487	auxin responsive GH3 gene family	-	brp04075(Plant hormone signal transduction)	M4EJQ7.1 PF03321.11;GH3;
A02	BjuA006869	7833393	7836266	399	G1/G2	PREDICTED: NAD(P)H dehydrogenase (quinone) FQR1-like [Brassica rapa]	FQR1	NAD(P)H dehydrogenase (quinone) FQR1 OS=Arabidopsis thaliana GN=FQR1 PE=1 SV=1	GO:0003955(NAD(P)H dehydrogenase (quinone) activity);GO:0005737(cytoplasm);GO:0005886(plasma membrane);GO:0009506(plasmodesma);GO:0010181(FMN binding);GO:0055114(oxidation-reduction process)	COG0655(Nadph-dependent fmn reductase)	K03809	NAD(P)H dehydrogenase (quinone)	EC:1.6.5.2	brp00130(Ubiquinone and other terpenoid-quinone biosynthesis)	M4EJQ9.1 PF03358.13;FMN_red;
A02	BjuA006870	7838746	7839138	393	G1/G2	PREDICTED: calcium-binding protein PBP1-like [Brassica rapa]	PBP1	Calcium-binding protein PBP1 OS=Arabidopsis thaliana GN=PBP1 PE=1 SV=1	GO:0005509(calcium ion binding);GO:0005515(protein binding);GO:0005634(nucleus);GO:0009733(response to auxin)	COG5126(Calcium-binding protein)	NA	NA	NA	NA(NA)	Q9LSQ6.1 PF13833.4;EF-hand_8;
A02	BjuA006871	7846712	7847417	603	G1/G2	PREDICTED: nucleolin-like [Brassica rapa]	-	-	GO:0003700(DNA binding transcription factor activity);GO:0005515(protein binding);GO:0005622(intracellular);GO:0005634(nucleus);GO:0006355(regulation of transcription, DNA-templated);GO:0008270(zinc ion binding);GO:0009409(response to cold);GO:0009555(pollen development)	ENOG410YSB4(zinc finger)	-	-	-	-	A0A022PWH4.1 PF00643.22;zf-B_box;
A02	BjuA006872	7853146	7853826	681	G1/G2	hypothetical protein BRARA_B01380 [Brassica rapa]	PHOS32	Universal stress protein PHOS32 OS=Arabidopsis thaliana GN=PHOS32 PE=1 SV=1	GO:0002238(response to molecule of fungal origin);GO:0005524(ATP binding);GO:0005634(nucleus);GO:0005829(cytosol);GO:0005886(plasma membrane);GO:0006950(response to stress);GO:0009507(chloroplast);GO:0016787(hydrolase activity)	ENOG411179Q(Universal stress protein family)	NA	NA	NA	NA(NA)	M4E1S1.1 PF00582.24;Usp;
A02	BjuA006873	7855208	7862452	3777	G1/G2	PREDICTED: trafficking protein particle complex II-specific subunit 130 homolog [Brassica rapa]	TRS130	Trafficking protein particle complex II-specific subunit 130 homolog OS=Arabidopsis thaliana GN=TRS130 PE=1 SV=1	GO:0000911(cytokinesis by cell plate formation);GO:0000919(cell plate assembly);GO:0003674(molecular_function);GO:0005886(plasma membrane);GO:0006891(intra-Golgi vesicle-mediated transport);GO:0034498(early endosome to Golgi transport);GO:1990071(TRAPPII protein complex)	ENOG410XNVF(trafficking protein particle complex)	NA	NA	NA	NA(NA)	M4E1S0.1 PF12584.6;TRAPPC10;
A02	BjuA006874	7864390	7869167	1992	G1/G2	PREDICTED: uncharacterized protein LOC106323665 [Brassica oleracea var. oleracea]	AtMg00310	Uncharacterized mitochondrial protein AtMg00310 OS=Arabidopsis thaliana GN=AtMg00310 PE=4 SV=1	GO:0003676(nucleic acid binding);GO:0003964(RNA-directed DNA polymerase activity);GO:0005739(mitochondrion);GO:0008150(biological_process)	ENOG410Y65V(Retrotransposon protein)	K01188	beta-glucosidase	EC:3.2.1.21	bna00500(Starch and sucrose metabolism);bna00460(Cyanoamino acid metabolism);bna00940(Phenylpropanoid biosynthesis)	A0A0D3B5R6.1 PF13966.4;zf-RVT;
A02	BjuA007178	10069956	10072258	1410	G1/G2	BnaA02g12450D [Brassica napus]	At1g56400	Putative F-box/LRR-repeat protein At1g56400 OS=Arabidopsis thaliana GN=At1g56400 PE=2 SV=1	GO:0003674(molecular_function);GO:0005634(nucleus);GO:0008150(biological_process)	ENOG4111C2X(- F-box, LRR and FBD domain containing protein, expressed)	-	-	-	-	A0A0D3CY57.1 PF03092.14;BT1;
A02	BjuA007179	10077756	10081400	3645	G1/G2	PREDICTED: uncharacterized protein LOC108871610 [Brassica rapa]	-	Retrovirus-related Pol polyprotein from type-1 retrotransposable element R2 (Fragment) OS=Popillia japonica PE=3 SV=1	GO:0003674(molecular_function);GO:0005575(cellular_component);GO:0008150(biological_process)	ENOG410XS82(Retrotransposon protein)	NA	NA	NA	NA(NA)	A0A087GG32.1 PF00078.25;RVT_1;
A02	BjuA007180	10093710	10096267	1020	G1/G2	BnaA02g12470D [Brassica napus]	PQL3	PsbQ-like protein 3, chloroplastic OS=Arabidopsis thaliana GN=PQL3 PE=2 SV=1	GO:0005509(calcium ion binding);GO:0009409(response to cold);GO:0009507(chloroplast);GO:0009535(chloroplast thylakoid membrane);GO:0009654(photosystem II oxygen evolving complex);GO:0009767(photosynthetic electron transport chain);GO:0019898(extrinsic component of membrane);GO:0045156(electron transporter, transferring electrons within the cyclic electron transport pathway of photosynthesis activ…	ENOG410YQRM(oxygen-evolving enhancer protein)	-	-	-	-	A0A0D3ANC4.1 PF05757.9;PsbQ;
A02	BjuA007181	10096751	10098919	1251	G1/G2	BnaA02g12480D [Brassica napus]	-	-	GO:0009507(chloroplast);GO:0010150(leaf senescence);GO:0010228(vegetative to reproductive phase transition of meristem);GO:0034599(cellular response to oxidative stress);GO:0072593(reactive oxygen species metabolic process)	ENOG4111KY0(NA)	-	-	-	-	-
A02	BjuA007374	12637437	12642676	981	G1/G2	PREDICTED: homeobox protein knotted-1-like 2 [Brassica rapa]	KNAT6	Homeobox protein knotted-1-like 6 OS=Arabidopsis thaliana GN=KNAT6 PE=1 SV=1	GO:0003700(DNA binding transcription factor activity);GO:0005515(protein binding);GO:0005634(nucleus);GO:0006355(regulation of transcription, DNA-templated);GO:0009723(response to ethylene);GO:0009736(cytokinin-activated signaling pathway);GO:0010094(specification of carpel identity);GO:0043565(sequence-specific DNA binding)	ENOG410XPMQ(homeobox)	NA	NA	NA	NA(NA)	R0GFW0.1 PF03791.11;KNOX2;
A02	BjuA007375	12645879	12647786	1452	G1/G2	cysteine-rich receptor-like protein kinase 2 [Brassica napus]	CRK2	Cysteine-rich receptor-like protein kinase 2 OS=Arabidopsis thaliana GN=CRK2 PE=2 SV=1	GO:0004674(protein serine/threonine kinase activity);GO:0005524(ATP binding);GO:0005576(extracellular region);GO:0005886(plasma membrane);GO:0006468(protein phosphorylation);GO:0009506(plasmodesma);GO:0010193(response to ozone);GO:0016021(integral component of membrane);GO:0016301(kinase activity);GO:0046777(protein autophosphorylation)	COG0515(Serine Threonine protein kinase)	NA	NA	NA	NA(NA)	A0A078ER82.1 PF00069.23;Pkinase;
A02	BjuA007376	12652238	12652735	498	G1/G2	pectinesterase inhibitor 1 [Brassica napus]	-	-	GO:0009507(chloroplast);GO:0010197(polar nucleus fusion);GO:0030599(pectinesterase activity);GO:0046910(pectinesterase inhibitor activity);GO:0071944(cell periphery)	ENOG41104KZ(PMEI)	-	-	-	-	A0A0D3APN3.1 PF04043.13;PMEI;
A02	BjuA007377	12664729	12668128	1143	G1/G2	uncharacterized protein LOC106395284 [Brassica napus]	-	-	GO:0005576(extracellular region);GO:0005739(mitochondrion);GO:0008150(biological_process)	ENOG4111S54(carboxyl-terminal peptidase)	-	-	-	-	A0A0D2ZRV0.1 PF03080.13;DUF239;
A02	BjuA007378	12686554	12689041	1098	G1/G2	PREDICTED: L-tryptophan--pyruvate aminotransferase 1-like [Brassica rapa]	TAA1	L-tryptophan--pyruvate aminotransferase 1 OS=Arabidopsis thaliana GN=TAA1 PE=1 SV=1	GO:0004021(L-alanine:2-oxoglutarate aminotransferase activity);GO:0004838(L-tyrosine:2-oxoglutarate aminotransferase activity);GO:0005634(nucleus);GO:0005737(cytoplasm);GO:0009641(shade avoidance);GO:0009684(indoleacetic acid biosynthetic process);GO:0009723(response to ethylene);GO:0009734(auxin-activated signaling pathway);GO:0009793(embryo development ending in seed dormancy);GO:0009908(flower…	ENOG41114NM(tryptophan aminotransferase)	K16903	L-tryptophan---pyruvate aminotransferase	EC:2.6.1.99	brp00380(Tryptophan metabolism)	D7KY42.1 PF04864.11;Alliinase_C;
A02	BjuA007379	12690967	12694336	1791	G1/G2	uncharacterized protein LOC106395263 [Brassica napus]	trpD	Anthranilate phosphoribosyltransferase OS=Pelotomaculum thermopropionicum (strain DSM 13744 / JCM 10971 / SI) GN=trpD PE=3 SV=1	GO:0003921(GMP synthase activity);GO:0003922(GMP synthase (glutamine-hydrolyzing) activity);GO:0005829(cytosol);GO:0006177(GMP biosynthetic process)	COG0547(Anthranilate phosphoribosyltransferase)	-	-	-	-	S6BDC7.1 PF00591.19;Glycos_transf_3;
A02	BjuA007380	12708130	12711457	462	G1/G2	uncharacterized protein LOC106421195 [Brassica napus]	-	-	-	ENOG41104Q8(NA)	-	-	-	-	-
A02	BjuA007381	12712967	12713528	201	G1/G2	unnamed protein product [Brassica rapa]	-	-	-	-	-	-	-	-	-
A02	BjuA007382	12713739	12714176	438	G1/G2	60S ribosomal protein L27a-3-like [Brassica napus]	RPL27AC	60S ribosomal protein L27a-3 OS=Arabidopsis thaliana GN=RPL27AC PE=2 SV=2	GO:0003735(structural constituent of ribosome);GO:0005737(cytoplasm);GO:0005829(cytosol);GO:0005840(ribosome);GO:0006412(translation);GO:0009506(plasmodesma);GO:0016020(membrane);GO:0022625(cytosolic large ribosomal subunit);GO:0022626(cytosolic ribosome)	COG0200(Binds to the 23S rRNA (By similarity))	K02900	large subunit ribosomal protein L27Ae	-	bna03010(Ribosome)	R0GST3.1 PF00828.17;Ribosomal_L27A;
A02	BjuA007383	12714753	12721090	2658	G1/G2	unnamed protein product [Brassica rapa]	mak16-a	Protein MAK16 homolog A OS=Xenopus laevis GN=mak16-a PE=2 SV=1	GO:0000460(maturation of 5.8S rRNA);GO:0000470(maturation of LSU-rRNA);GO:0003676(nucleic acid binding);GO:0005730(nucleolus);GO:0030687(preribosome, large subunit precursor)	ENOG41120V6(NA)	NA	NA	NA	NA(NA)	M4CIB6.1 PF01778.15;Ribosomal_L28e;
A02	BjuA007384	12723017	12723346	201	G1/G2	hypothetical protein BRARA_B01924 [Brassica rapa]	UEV1B	Ubiquitin-conjugating enzyme E2 variant 1B OS=Arabidopsis thaliana GN=UEV1B PE=1 SV=1	GO:0004842(ubiquitin-protein transferase activity);GO:0005515(protein binding);GO:0005634(nucleus);GO:0005737(cytoplasm);GO:0006301(postreplication repair);GO:0031372(UBC13-MMS2 complex);GO:0031625(ubiquitin protein ligase binding);GO:0061630(ubiquitin protein ligase activity);GO:0070534(protein K63-linked ubiquitination)	ENOG4111MDW(ubiquitin-conjugating enzyme)	NA	NA	NA	NA(NA)	A0A087HH80.1 PF00179.24;UQ_con;
A02	BjuA007385	12749915	12751398	579	G1/G2	PREDICTED: probable peroxygenase 4 [Brassica rapa]	PXG4	Probable peroxygenase 4 OS=Arabidopsis thaliana GN=PXG4 PE=1 SV=1	GO:0005509(calcium ion binding);GO:0005811(lipid droplet);GO:0009507(chloroplast);GO:0009737(response to abscisic acid);GO:0009819(drought recovery);GO:0046872(metal ion binding);GO:0055114(oxidation-reduction process);GO:1990137(plant seed peroxidase activity)	ENOG410YGB5(Caleosin related protein)	K17991	peroxygenase	EC:1.11.2.3	brp00073(Cutin, suberine and wax biosynthesis)	M4DI68.1 PF05042.11;Caleosin;
A02	BjuA007386	12760062	12760892	831	G1/G2	unnamed protein product [Brassica rapa]	CRRSP2	Cysteine-rich repeat secretory protein 2 OS=Arabidopsis thaliana GN=CRRSP2 PE=1 SV=1	GO:0005576(extracellular region);GO:0009506(plasmodesma);GO:0016021(integral component of membrane);GO:0016032(viral process);GO:0042742(defense response to bacterium);GO:0051707(response to other organism)	-	NA	NA	NA	NA(NA)	A0A078ER72.1 PF01657.15;Stress-antifung;
A02	BjuA007387	12764545	12766619	819	G1/G2	unnamed protein product, partial [Brassica rapa]	TIFY7	Protein TIFY 7 OS=Arabidopsis thaliana GN=TIFY7 PE=1 SV=2	GO:0003714(transcription corepressor activity);GO:0005515(protein binding);GO:0005634(nucleus);GO:0006351(transcription, DNA-templated);GO:0006355(regulation of transcription, DNA-templated);GO:0006952(defense response);GO:0009611(response to wounding);GO:0009753(response to jasmonic acid);GO:0031347(regulation of defense response);GO:1903507(negative regulation of nucleic acid-templated transcri…	ENOG411054B(TIFY)	K13464	jasmonate ZIM domain-containing protein	-	brp04075(Plant hormone signal transduction)	A0A0D3APQ0.1 PF06200.12;tify;
A02	BjuA007388	12785640	12786242	603	G1/G2	hypothetical protein BRARA_B01931 [Brassica rapa]	-	21 kDa protein OS=Daucus carota PE=2 SV=1	GO:0043086(negative regulation of catalytic activity);GO:0046910(pectinesterase inhibitor activity)	ENOG410YPKA(Invertase pectin methylesterase inhibitor family protein)	K01051	pectinesterase	EC:3.1.1.11	atr00040(Pentose and glucuronate interconversions)	M4CUP4.1 PF04043.13;PMEI;
A02	BjuA007389	12788507	12790264	1011	G1/G2	unnamed protein product [Brassica rapa]	At1g61460	G-type lectin S-receptor-like serine/threonine-protein kinase At1g61460 OS=Arabidopsis thaliana GN=At1g61460 PE=2 SV=4	GO:0004672(protein kinase activity);GO:0005524(ATP binding);GO:0005634(nucleus);GO:0006468(protein phosphorylation);GO:0016301(kinase activity);GO:0016310(phosphorylation)	COG0515(Serine Threonine protein kinase)	NA	NA	NA	NA(NA)	A0A078EA45.1 PF07714.15;Pkinase_Tyr;
A02	BjuA007390	12794949	12795281	249	G1/G2	WD repeat-containing protein 70-like [Brassica napus]	WDR70	WD repeat-containing protein 70 OS=Bos taurus GN=WDR70 PE=2 SV=1	GO:0000166(nucleotide binding);GO:0005737(cytoplasm);GO:0008150(biological_process);GO:0031464(Cul4A-RING E3 ubiquitin ligase complex);GO:0080008(Cul4-RING E3 ubiquitin ligase complex)	ENOG410XP76(WD repeat domain 70)	-	-	-	-	-
A02	BjuA007391	12806454	12807358	576	G1/G2	unnamed protein product [Brassica rapa]	ndhL	NAD(P)H-quinone oxidoreductase subunit L, chloroplastic OS=Arabidopsis thaliana GN=ndhL PE=2 SV=1	GO:0009507(chloroplast);GO:0009535(chloroplast thylakoid membrane);GO:0009773(photosynthetic electron transport in photosystem I);GO:0010258(NADH dehydrogenase complex (plastoquinone) assembly);GO:0010598(NAD(P)H dehydrogenase complex (plastoquinone));GO:0016021(integral component of membrane);GO:0016655(oxidoreductase activity, acting on NAD(P)H, quinone or similar compound as acceptor);GO:00426…	ENOG4112C5D(NADH dehydrogenase transmembrane subunit)	K21888	glutathione dehydrogenase/transferase	EC:1.8.5.1 2.5.1.18	egu00053(Ascorbate and aldarate metabolism);egu00480(Glutathione metabolism)	A0A078F4T0.1 PF10716.7;NdhL;
A02	BjuA007392	12807625	12810531	1773	G1/G2	transmembrane protein 214-like [Brassica napus]	-	-	GO:0003729(mRNA binding);GO:0005634(nucleus);GO:0005774(vacuolar membrane);GO:0005783(endoplasmic reticulum);GO:0005794(Golgi apparatus);GO:0005829(cytosol);GO:0005886(plasma membrane);GO:0009506(plasmodesma);GO:0016020(membrane)	ENOG410ZR2A(Transmembrane protein 214)	NA	NA	NA	NA(NA)	V4KE89.1 PF10151.7;TMEM214;
A02	BjuA008038	24461427	24464605	1788	G1/G3	threonine dehydratase biosynthetic, chloroplastic-like [Brassica napus]	OMR1	Threonine dehydratase biosynthetic, chloroplastic OS=Arabidopsis thaliana GN=OMR1 PE=1 SV=1	GO:0004794(L-threonine ammonia-lyase activity);GO:0006566(threonine metabolic process);GO:0009097(isoleucine biosynthetic process);GO:0009507(chloroplast);GO:0030170(pyridoxal phosphate binding)	COG1171(Threonine dehydratase)	K01754	threonine dehydratase	EC:4.3.1.19	bna00260(Glycine, serine and threonine metabolism);bna00290(Valine, leucine and isoleucine biosynthesis)	A0A0D3CLJ2.1 PF00291.23;PALP;
A02	BjuA008039	24465598	24466423	366	G1/G3	hypothetical protein DY000_00006597 [Brassica cretica]	TAF12	Transcription initiation factor TFIID subunit 12 OS=Arabidopsis thaliana GN=TAF12 PE=1 SV=1	GO:0000124(SAGA complex);GO:0001102(RNA polymerase II activating transcription factor binding);GO:0003677(DNA binding);GO:0004402(histone acetyltransferase activity);GO:0005634(nucleus);GO:0005669(transcription factor TFIID complex);GO:0006355(regulation of transcription, DNA-templated);GO:0017025(TBP-class protein binding);GO:0043966(histone H3 acetylation);GO:0046982(protein heterodimerization …	COG5624(TAF12 RNA polymerase II, TATA box binding protein (TBP)-associated factor)	K03126	transcription initiation factor TFIID subunit 12	-	ath03022(Basal transcription factors)	A0A0D3AET7.1 PF03847.11;TFIID_20kDa;
A02	BjuA008040	24466568	24469250	1509	G1/G3	PREDICTED: germin-like protein subfamily 3 member 2 [Brassica rapa]	At3g10080	Germin-like protein subfamily 3 member 2 OS=Arabidopsis thaliana GN=At3g10080 PE=2 SV=1	GO:0005576(extracellular region);GO:0030145(manganese ion binding);GO:0045735(nutrient reservoir activity);GO:0048046(apoplast)	ENOG410YH14(germin-like protein)	K03126	transcription initiation factor TFIID subunit 12	-	ath03022(Basal transcription factors)	A0A078G6X9.1 PF00190.20;Cupin_1;
A02	BjuA008041	24476487	24476888	402	G1/G3	uncharacterized protein LOC106351154 [Brassica napus]	-	-	GO:0003674(molecular_function);GO:0005634(nucleus);GO:0008150(biological_process)	ENOG410YZ1F(NA)	-	-	-	-	M4EZ51.1 PF14009.4;DUF4228;
A02	BjuA008042	24506233	24507756	465	G1/G3	PREDICTED: tubulin-folding cofactor B [Raphanus sativus]	TFCB	Tubulin-folding cofactor B OS=Arabidopsis thaliana GN=TFCB PE=1 SV=1	GO:0005515(protein binding);GO:0005634(nucleus);GO:0005737(cytoplasm);GO:0005829(cytosol);GO:0007021(tubulin complex assembly);GO:0009524(phragmoplast);GO:0009793(embryo development ending in seed dormancy);GO:0051301(cell division)	ENOG410YKGB(tubulin folding cofactor B)	NA	NA	NA	NA(NA)	A0A0D3CLI2.1 PF14560.4;Ubiquitin_2;
A02	BjuA008043	24519890	24520241	282	G1/G3	BnaC01g38750D [Brassica napus]	MLP328	MLP-like protein 328 OS=Arabidopsis thaliana GN=MLP328 PE=2 SV=1	GO:0003674(molecular_function);GO:0005575(cellular_component);GO:0006952(defense response);GO:0009607(response to biotic stimulus)	ENOG41113R7(Major latex)	-	-	-	-	A0A078GA03.1 PF00407.17;Bet_v_1;
A02	BjuA008044	24538606	24539921	858	G1/G3	probable calcium-binding protein CML49 [Brassica napus]	CML50	Probable calcium-binding protein CML50 OS=Arabidopsis thaliana GN=CML50 PE=2 SV=1	GO:0005509(calcium ion binding);GO:0005634(nucleus)	ENOG410YKQK(grancalcin, EF-hand calcium binding protein)	K13448	calcium-binding protein CML	-	bna04626(Plant-pathogen interaction)	A8N4L2.1 PF13499.4;EF-hand_7;
A02	BjuA008045	24542527	24542889	363	G1/G3	PREDICTED: probable mediator of RNA polymerase II transcription subunit 37e [Brassica rapa]	MED37D	Probable mediator of RNA polymerase II transcription subunit 37c OS=Arabidopsis thaliana GN=MED37D PE=1 SV=2	GO:0005515(protein binding);GO:0005524(ATP binding);GO:0005618(cell wall);GO:0005634(nucleus);GO:0005794(Golgi apparatus);GO:0005829(cytosol);GO:0005886(plasma membrane);GO:0006351(transcription, DNA-templated);GO:0006355(regulation of transcription, DNA-templated);GO:0006457(protein folding);GO:0009408(response to heat);GO:0009615(response to virus);GO:0009617(response to bacterium);GO:0034620(c…	COG0443(Heat shock protein)	K03283	heat shock 70kDa protein 1/2/6/8	-	boe03040(Spliceosome);boe04141(Protein processing in endoplasmic reticulum);boe04144(Endocytosis)	A0A0D3E3K9.1 PF00012.18;HSP70;
A02	BjuA008046	24547694	24549835	1224	G1/G3	PREDICTED: ATPase ASNA1 homolog 2-like [Brassica rapa]	MTH_1511	Putative arsenical pump-driving ATPase OS=Methanothermobacter thermautotrophicus (strain ATCC 29096 / DSM 1053 / JCM 10044 / NBRC 100330 / Delta H) GN=MTH_1511 PE=1 SV=1	GO:0005524(ATP binding);GO:0005739(mitochondrion);GO:0005759(mitochondrial matrix);GO:0006820(anion transport);GO:0009507(chloroplast);GO:0016020(membrane);GO:0016887(ATPase activity)	COG0003(ATPase required for the post-translational delivery of tail-anchored (TA) proteins to the endoplasmic reticulum. Recognizes and selectively binds the transmembrane domain of TA proteins in the cytosol. This complex then targets to the endoplasmic reticulum by membrane-bound receptors, where the tail- anchored protein is released for insertion. This process is regulated by ATP binding and …	NA	NA	NA	NA(NA)	M4EZ64.1 PF02374.13;ArsA_ATPase;
A02	BjuA008047	24553220	24556444	1890	G1/G3	glycerol-3-phosphate dehydrogenase SDP6, mitochondrial-like [Brassica napus]	SDP6	Glycerol-3-phosphate dehydrogenase SDP6, mitochondrial OS=Arabidopsis thaliana GN=SDP6 PE=1 SV=1	GO:0004368(glycerol-3-phosphate dehydrogenase activity);GO:0005739(mitochondrion);GO:0005743(mitochondrial inner membrane);GO:0006071(glycerol metabolic process);GO:0006127(glycerophosphate shuttle);GO:0009331(glycerol-3-phosphate dehydrogenase complex);GO:0019563(glycerol catabolic process);GO:0052591(sn-glycerol-3-phosphate:ubiquinone-8 oxidoreductase activity)	COG0578(glycerol-3-phosphate dehydrogenase)	K00111	glycerol-3-phosphate dehydrogenase	EC:1.1.5.3	bna00564(Glycerophospholipid metabolism)	M4EM13.1 PF01266.22;DAO;
A02	BjuA040975	1240735	1242007	675	G1/G2	PREDICTED: uncharacterized protein LOC103850641 [Brassica rapa]	-	-	GO:0005515(protein binding);GO:0009507(chloroplast);GO:0009535(chloroplast thylakoid membrane);GO:0009579(thylakoid);GO:0009735(response to cytokinin);GO:0016021(integral component of membrane);GO:0061635(regulation of protein complex stability)	ENOG4111PN6(NA)	-	-	-	-	-
A02	BjuA040976	1242714	1244030	1317	G1/G2	unnamed protein product [Brassica rapa]	CIPK2	CBL-interacting serine/threonine-protein kinase 2 OS=Arabidopsis thaliana GN=CIPK2 PE=1 SV=1	GO:0004674(protein serine/threonine kinase activity);GO:0005515(protein binding);GO:0005524(ATP binding);GO:0005622(intracellular);GO:0005886(plasma membrane);GO:0016301(kinase activity);GO:0018105(peptidyl-serine phosphorylation);GO:0018107(peptidyl-threonine phosphorylation);GO:0035556(intracellular signal transduction)	COG0515(Serine Threonine protein kinase)	NA	NA	NA	NA(NA)	A0A0D3AI16.1 PF00069.23;Pkinase;
A02	BjuA040977	1247729	1249306	786	G1/G2	unnamed protein product, partial [Brassica rapa]	RPS4A	40S ribosomal protein S4-1 OS=Arabidopsis thaliana GN=RPS4A PE=2 SV=1	GO:0003723(RNA binding);GO:0003735(structural constituent of ribosome);GO:0005737(cytoplasm);GO:0005774(vacuolar membrane);GO:0005794(Golgi apparatus);GO:0005829(cytosol);GO:0005840(ribosome);GO:0005886(plasma membrane);GO:0006412(translation);GO:0009507(chloroplast);GO:0019843(rRNA binding);GO:0022627(cytosolic small ribosomal subunit)	COG1471((ribosomal) protein)	K02987	small subunit ribosomal protein S4e	-	brp03010(Ribosome)	M4CRC7.1 PF00900.18;Ribosomal_S4e;
A02	BjuA040978	1250284	1251796	957	G1/G2	probable WRKY transcription factor 26 [Brassica rapa]	WRKY26	Probable WRKY transcription factor 26 OS=Arabidopsis thaliana GN=WRKY26 PE=1 SV=2	GO:0003700(DNA binding transcription factor activity);GO:0005515(protein binding);GO:0005634(nucleus);GO:0006351(transcription, DNA-templated);GO:0006355(regulation of transcription, DNA-templated);GO:0034605(cellular response to heat);GO:0043565(sequence-specific DNA binding);GO:0070370(cellular heat acclimation)	ENOG4112BTF(WRKY transcription factor)	K13424	WRKY transcription factor 33	-	dct04016(MAPK signaling pathway - plant);dct04626(Plant-pathogen interaction)	A0A0D3AI18.1 PF03106.13;WRKY;
A02	BjuA040979	1257441	1258916	1131	G1/G2	gibberellin 20 oxidase 3 [Brassica napus]	GA20OX3	Gibberellin 20 oxidase 3 OS=Arabidopsis thaliana GN=GA20OX3 PE=2 SV=1	GO:0005737(cytoplasm);GO:0009416(response to light stimulus);GO:0009686(gibberellin biosynthetic process);GO:0009740(gibberellic acid mediated signaling pathway);GO:0009826(unidimensional cell growth);GO:0009908(flower development);GO:0045544(gibberellin 20-oxidase activity);GO:0046872(metal ion binding);GO:0055114(oxidation-reduction process)	COG3491(2OGFe(II) oxygenase)	K05282	gibberellin 20-oxidase	EC:1.14.11.12	bna00904(Diterpenoid biosynthesis)	A0A078EVQ2.1 PF14226.4;DIOX_N;
A02	BjuA040980	1279980	1280860	639	G1/G2	ethylene-responsive transcription factor ERF115 isoform X1 [Brassica napus]	ERF115	Ethylene-responsive transcription factor ERF115 OS=Arabidopsis thaliana GN=ERF115 PE=1 SV=1	GO:0003677(DNA binding);GO:0003700(DNA binding transcription factor activity);GO:0005634(nucleus);GO:0006351(transcription, DNA-templated);GO:0006355(regulation of transcription, DNA-templated);GO:0009873(ethylene-activated signaling pathway)	ENOG410YY7D(Transcription factor)	K12900	FUS-interacting serine-arginine-rich protein 1	-	lang03040(Spliceosome)	A0A078CT17.1 PF00847.18;AP2;
A02	BjuA040981	1284376	1286971	1404	G1/G2	hypothetical protein BRARA_B00240 [Brassica rapa]	Slc25a24	Calcium-binding mitochondrial carrier protein SCaMC-1 OS=Mus musculus GN=Slc25a24 PE=1 SV=1	GO:0005347(ATP transmembrane transporter activity);GO:0005509(calcium ion binding);GO:0005739(mitochondrion);GO:0005743(mitochondrial inner membrane);GO:0006810(transport);GO:0006839(mitochondrial transport);GO:0015114(phosphate ion transmembrane transporter activity);GO:0015217(ADP transmembrane transporter activity);GO:0015866(ADP transport);GO:0015867(ATP transport);GO:0016021(integral compone…	ENOG410XQ4P(Solute carrier family 25 (Mitochondrial carrier)	NA	NA	NA	NA(NA)	R0GUJ1.1 PF00153.25;Mito_carr;
A02	BjuA040982	1297701	1302057	3135	G1/G2	unnamed protein product [Brassica rapa]	-	-	GO:0003676(nucleic acid binding);GO:0005634(nucleus);GO:0006281(DNA repair);GO:0008081(phosphoric diester hydrolase activity);GO:0008270(zinc ion binding);GO:0016818(hydrolase activity, acting on acid anhydrides, in phosphorus-containing anhydrides)	ENOG410XSKK(Tyrosyl-DNA phosphodiesterase)	-	-	-	-	A0A078IXY2.1 PF06087.10;Tyr-DNA_phospho;
A02	BjuA040983	1302539	1304284	1089	G1/G2	PREDICTED: pectinesterase PPME1 [Brassica rapa]	PPME1	Pectinesterase PPME1 OS=Arabidopsis thaliana GN=PPME1 PE=1 SV=1	GO:0005515(protein binding);GO:0005576(extracellular region);GO:0005783(endoplasmic reticulum);GO:0005794(Golgi apparatus);GO:0009505(plant-type cell wall);GO:0009860(pollen tube growth);GO:0030599(pectinesterase activity);GO:0042545(cell wall modification);GO:0045330(aspartyl esterase activity);GO:0045490(pectin catabolic process);GO:0050829(defense response to Gram-negative bacterium);GO:009040…	COG4677(pectinesterase)	K01051	pectinesterase	EC:3.1.1.11	brp00040(Pentose and glucuronate interconversions)	A0A078IXZ1.1 PF01095.17;Pectinesterase;
A02	BjuA040984	1305736	1307188	1086	G1/G2	PREDICTED: probable pectinesterase 50 [Brassica rapa]	PME50	Probable pectinesterase 50 OS=Arabidopsis thaliana GN=PME50 PE=2 SV=1	GO:0005576(extracellular region);GO:0005618(cell wall);GO:0009505(plant-type cell wall);GO:0030599(pectinesterase activity);GO:0042545(cell wall modification);GO:0045330(aspartyl esterase activity);GO:0045490(pectin catabolic process)	COG4677(pectinesterase)	K01051	pectinesterase	EC:3.1.1.11	aly00040(Pentose and glucuronate interconversions)	M4EIT3.1 PF01095.17;Pectinesterase;
A02	BjuA040985	1309223	1311655	1233	G1/G2	glutamate dehydrogenase 2-like [Brassica napus]	GDH2	Glutamate dehydrogenase 2 OS=Arabidopsis thaliana GN=GDH2 PE=1 SV=1	GO:0004352(glutamate dehydrogenase (NAD+) activity);GO:0004353(glutamate dehydrogenase [NAD(P)+] activity);GO:0005507(copper ion binding);GO:0005524(ATP binding);GO:0005737(cytoplasm);GO:0005739(mitochondrion);GO:0005774(vacuolar membrane);GO:0005794(Golgi apparatus);GO:0006520(cellular amino acid metabolic process);GO:0008270(zinc ion binding);GO:0009651(response to salt stress);GO:0016491(oxido…	COG0334(oxidoreductase activity, acting on the CH-NH2 group of donors, NAD or NADP as acceptor)	K00261	glutamate dehydrogenase (NAD(P)+)	EC:1.4.1.3	bna00910(Nitrogen metabolism);bna00250(Alanine, aspartate and glutamate metabolism);bna00220(Arginine biosynthesis);bna00471(D-Glutamine and D-glutamate metabolism)	A0A078CNE4.1 PF00208.19;ELFV_dehydrog;
A02	BjuA040986	1316124	1318173	1083	G1/G2	flavanone 3-dioxygenase 3-like isoform X1 [Brassica napus]	DMR6	Protein DOWNY MILDEW RESISTANCE 6 OS=Arabidopsis thaliana GN=DMR6 PE=1 SV=1	GO:0005737(cytoplasm);GO:0009813(flavonoid biosynthetic process);GO:0016706(oxidoreductase activity, acting on paired donors, with incorporation or reduction of molecular oxygen, 2-oxoglutarate as one donor, and incorporation of one atom each of oxygen into both donors);GO:0080167(response to karrikin)	COG3491(2OGFe(II) oxygenase)	K05278	flavonol synthase	EC:1.14.20.6	egr00941(Flavonoid biosynthesis)	M4EIT1.1 PF14226.4;DIOX_N;
A02	BjuA040987	1319650	1320759	528	G1/G2	oleosin-B6-like [Brassica napus]	OlnB6	Oleosin-B6 OS=Brassica napus GN=OlnB6 PE=1 SV=3	GO:0005576(extracellular region);GO:0008289(lipid binding);GO:0009859(pollen hydration);GO:0012511(monolayer-surrounded lipid storage body);GO:0016020(membrane);GO:0016021(integral component of membrane);GO:0019915(lipid storage);GO:0019953(sexual reproduction);GO:0031012(extracellular matrix);GO:0048544(recognition of pollen);GO:0070505(pollen coat)	-	-	-	-	-	M4EIT0.1 PF01277.15;Oleosin;
A02	BjuA040988	1323389	1324837	1449	G1/G2	uncharacterized protein LOC111199024 [Brassica napus]	AtMg00310	Uncharacterized mitochondrial protein AtMg00310 OS=Arabidopsis thaliana GN=AtMg00310 PE=4 SV=1	GO:0003676(nucleic acid binding);GO:0003723(RNA binding);GO:0003964(RNA-directed DNA polymerase activity);GO:0005739(mitochondrion);GO:0006278(RNA-dependent DNA biosynthetic process)	ENOG410Y65V(Retrotransposon protein)	K01188	beta-glucosidase	EC:3.2.1.21	bna00500(Starch and sucrose metabolism);bna00460(Cyanoamino acid metabolism);bna00940(Phenylpropanoid biosynthesis)	A0A078E4E2.1 PF13966.4;zf-RVT;
A02	BjuA040989	1329177	1333516	2697	G1/G2	-	-	-	-	-	-	-	-	-	-
A02	BjuA040990	1335016	1335336	321	G1/G2	hypothetical protein DY000_00009043, partial [Brassica cretica]	OlnB6	Oleosin-B6 OS=Brassica napus GN=OlnB6 PE=1 SV=3	GO:0005576(extracellular region);GO:0008289(lipid binding);GO:0009859(pollen hydration);GO:0012511(monolayer-surrounded lipid storage body);GO:0016020(membrane);GO:0016021(integral component of membrane);GO:0019915(lipid storage);GO:0019953(sexual reproduction);GO:0031012(extracellular matrix);GO:0048544(recognition of pollen);GO:0070505(pollen coat)	-	-	-	-	-	A0A078IXY4.1 PF01277.15;Oleosin;
A02	BjuA040991	1338285	1349198	555	G1/G2	hypothetical protein DY000_00009044 [Brassica cretica]	OlnB1	Oleosin-B1 OS=Brassica napus GN=OlnB1 PE=1 SV=2	GO:0003674(molecular_function);GO:0005739(mitochondrion)	ENOG41107V2(glycine-rich protein 20)	-	-	-	-	M4EIS7.1 PF01277.15;Oleosin;
A02	BjuA040992	1350622	1351726	450	G1/G2	oleosin-B1-like [Brassica napus]	OlnB1	Oleosin-B1 OS=Brassica napus GN=OlnB1 PE=1 SV=2	GO:0005576(extracellular region);GO:0008289(lipid binding);GO:0012511(monolayer-surrounded lipid storage body);GO:0016020(membrane);GO:0016021(integral component of membrane);GO:0019915(lipid storage);GO:0019953(sexual reproduction);GO:0045735(nutrient reservoir activity)	ENOG41107V2(glycine-rich protein 20)	-	-	-	-	A0A0D3AI36.1 PF01277.15;Oleosin;
A02	BjuA040993	1353496	1354041	546	G1/G2	PREDICTED: ethylene-responsive transcription factor ERF106-like [Brassica rapa]	ERF106	Ethylene-responsive transcription factor ERF106 OS=Arabidopsis thaliana GN=ERF106 PE=2 SV=1	GO:0000976(transcription regulatory region sequence-specific DNA binding);GO:0003677(DNA binding);GO:0003700(DNA binding transcription factor activity);GO:0005634(nucleus);GO:0006351(transcription, DNA-templated);GO:0006355(regulation of transcription, DNA-templated);GO:0009414(response to water deprivation);GO:0009873(ethylene-activated signaling pathway);GO:0019760(glucosinolate metabolic proce…	ENOG4111416(Transcription factor)	NA	NA	NA	NA(NA)	Q9LY05.1 PF00847.18;AP2;
A02	BjuA040994	1356398	1357982	918	G1/G2	autophagy-related protein 3-like [Brassica napus]	ATG3	Autophagy-related protein 3 OS=Arabidopsis thaliana GN=ATG3 PE=1 SV=2	GO:0000045(autophagosome assembly);GO:0000153(cytoplasmic ubiquitin ligase complex);GO:0000422(autophagy of mitochondrion);GO:0005737(cytoplasm);GO:0005829(cytosol);GO:0006914(autophagy);GO:0015031(protein transport);GO:0019776(Atg8 ligase activity);GO:0044804(autophagy of nucleus)	ENOG410Y3BC(Autophagy-related protein 3)	K08343	ubiquitin-like-conjugating enzyme ATG3	-	bna04136(Autophagy - other eukaryotes)	M4EIS4.1 PF03986.11;Autophagy_N;
A02	BjuA040995	1359372	1362943	1380	G1/G2	protein RFT1 homolog [Brassica napus]	rft1	Protein RFT1 homolog OS=Xenopus tropicalis GN=rft1 PE=2 SV=1	GO:0005789(endoplasmic reticulum membrane);GO:0034203(glycolipid translocation)	ENOG410Y1D5(RFT1 homolog)	NA	NA	NA	NA(NA)	A0A078FMF1.1 PF04506.11;Rft-1;
A02	BjuA045384	9873427	9875382	972	G1/G2	glutamine [Brassica napus]	GLN1-2	Glutamine synthetase cytosolic isozyme 1-2 OS=Arabidopsis thaliana GN=GLN1-2 PE=1 SV=2	GO:0004356(glutamate-ammonia ligase activity);GO:0005507(copper ion binding);GO:0005515(protein binding);GO:0005524(ATP binding);GO:0005618(cell wall);GO:0005737(cytoplasm);GO:0005829(cytosol);GO:0005886(plasma membrane);GO:0006542(glutamine biosynthetic process);GO:0009399(nitrogen fixation);GO:0009506(plasmodesma);GO:0010150(leaf senescence);GO:0022626(cytosolic ribosome);GO:0042128(nitrate ass…	COG0174(glutamine synthetase)	K01915	glutamine synthetase	EC:6.3.1.2	bna00630(Glyoxylate and dicarboxylate metabolism);bna00910(Nitrogen metabolism);bna00250(Alanine, aspartate and glutamate metabolism);bna00220(Arginine biosynthesis)	A0A078EKN6.1 PF00120.22;Gln-synt_C;
A02	BjuA045385	9894150	9895499	516	G1/G2	unnamed protein product [Brassica oleracea]	RPS4A	40S ribosomal protein S4-1 OS=Arabidopsis thaliana GN=RPS4A PE=2 SV=1	GO:0003735(structural constituent of ribosome);GO:0006412(translation);GO:0022627(cytosolic small ribosomal subunit)	-	K02987	small subunit ribosomal protein S4e	-	bna03010(Ribosome)	-
A02	BjuA045386	9902520	9903284	765	G1/G2	hypothetical protein BRARA_B01643 [Brassica rapa]	-	-	GO:0003674(molecular_function);GO:0005634(nucleus);GO:0008150(biological_process)	ENOG41106NI(NA)	-	-	-	-	-
A02	BjuA045387	9912202	9914640	2160	G1/G2	hypothetical protein BRARA_B01641 [Brassica rapa]	MMD1	PHD finger protein MALE MEIOCYTE DEATH 1 OS=Arabidopsis thaliana GN=MMD1 PE=2 SV=1	GO:0000212(meiotic spindle organization);GO:0003677(DNA binding);GO:0005634(nucleus);GO:0005719(nuclear euchromatin);GO:0005739(mitochondrion);GO:0006351(transcription, DNA-templated);GO:0006355(regulation of transcription, DNA-templated);GO:0007060(male meiosis chromosome segregation);GO:0010032(meiotic chromosome condensation);GO:0033613(activating transcription factor binding);GO:0042393(histo…	ENOG410XT5Q(PHD finger protein MALE)	-	-	-	-	A0A078FVI6.1 PF00628.27;PHD;
A02	BjuA045388	9915234	9916517	1284	G1/G2	PREDICTED: U-box domain-containing protein 20 [Brassica rapa]	PUB20	U-box domain-containing protein 20 OS=Arabidopsis thaliana GN=PUB20 PE=2 SV=1	GO:0004842(ubiquitin-protein transferase activity);GO:0005737(cytoplasm);GO:0010200(response to chitin);GO:0016567(protein ubiquitination)	ENOG410Y3P9(Ubox domain-containing protein)	K10260	F-box and WD-40 domain protein 7	-	cre04120(Ubiquitin mediated proteolysis)	M4FF80.1 PF04564.13;U-box;
A02	BjuA045389	9928895	9929179	285	G1/G2	unnamed protein product [Brassica rapa]	-	-	-	-	-	-	-	-	-
A02	BjuA045390	9935300	9935542	243	G1/G2	unnamed protein product [Brassica rapa]	-	-	-	-	-	-	-	-	-
A02	BjuA045391	9940814	9941599	786	G1/G2	PREDICTED: zinc finger protein 4-like [Brassica rapa]	ZFP4	Zinc finger protein 4 OS=Arabidopsis thaliana GN=ZFP4 PE=2 SV=2	GO:0003676(nucleic acid binding);GO:0003700(DNA binding transcription factor activity);GO:0005634(nucleus);GO:0006355(regulation of transcription, DNA-templated);GO:0008270(zinc ion binding);GO:0009738(abscisic acid-activated signaling pathway);GO:0009788(negative regulation of abscisic acid-activated signaling pathway);GO:0019760(glucosinolate metabolic process);GO:0043565(sequence-specific DNA …	ENOG410ZCT7(Zinc finger protein)	-	-	-	-	-
A02	BjuA045392	9943208	9943839	573	G1/G2	protein OPI10 homolog [Brassica napus]	-	-	GO:0003674(molecular_function);GO:0005737(cytoplasm);GO:0005829(cytosol);GO:0008150(biological_process)	ENOG4111H6N(chromosome 11 open reading frame 73)	-	-	-	-	V4MBR2.1 PF05603.10;DUF775;
A02	BjuA045393	9948608	9949697	669	G1/G2	BnaA02g12340D [Brassica napus]	-	-	GO:0005737(cytoplasm);GO:0005829(cytosol);GO:0009506(plasmodesma)	ENOG4111U5G(Component of the eukaryotic translation initiation factor 3 (eIF-3) complex, which is involved in protein synthesis and, together with other initiation factors, stimulates binding of mRNA and methionyl-tRNAi to the 40S ribosome (By similarity))	K03245	translation initiation factor 3 subunit J	-	brp03013(RNA transport)	M4FF76.1 PF08597.8;eIF3_subunit;
A02	BjuA045394	9950157	9953169	405	G1/G2	peroxiredoxin-2B [Brassica napus]	PRXIIB	Peroxiredoxin-2B OS=Arabidopsis thaliana GN=PRXIIB PE=1 SV=1	GO:0004601(peroxidase activity);GO:0005737(cytoplasm);GO:0005829(cytosol);GO:0005886(plasma membrane);GO:0009507(chloroplast);GO:0016020(membrane);GO:0016209(antioxidant activity);GO:0045454(cell redox homeostasis);GO:0046686(response to cadmium ion);GO:0051920(peroxiredoxin activity);GO:0055114(oxidation-reduction process)	COG0678(peroxiredoxin)	NA	NA	NA	NA(NA)	A0A087HFY2.1 PF08534.8;Redoxin;
A02	BjuA045395	9955421	9958257	1239	G1/G2	PREDICTED: cytosolic isocitrate dehydrogenase [NADP] [Brassica rapa]	CICDH	Cytosolic isocitrate dehydrogenase [NADP] OS=Arabidopsis thaliana GN=CICDH PE=2 SV=1	GO:0000287(magnesium ion binding);GO:0004450(isocitrate dehydrogenase (NADP+) activity);GO:0005507(copper ion binding);GO:0005829(cytosol);GO:0005886(plasma membrane);GO:0006099(tricarboxylic acid cycle);GO:0006102(isocitrate metabolic process);GO:0006739(NADP metabolic process);GO:0009506(plasmodesma);GO:0009507(chloroplast);GO:0009570(chloroplast stroma);GO:0009651(response to salt stress);GO:0…	COG0538(isocitrate dehydrogenase (NADp))	K00031	isocitrate dehydrogenase	EC:1.1.1.42	brp00020(Citrate cycle (TCA cycle));brp00480(Glutathione metabolism);brp04146(Peroxisome)	A0A078JAF1.1 PF00180.18;Iso_dh;
A02	BjuA045396	9962453	9965540	1392	G1/G2	hypothetical protein BRARA_B01634 [Brassica rapa]	NAC086	NAC domain-containing protein 86 OS=Arabidopsis thaliana GN=NAC086 PE=2 SV=1	GO:0003677(DNA binding);GO:0003700(DNA binding transcription factor activity);GO:0005634(nucleus);GO:0006351(transcription, DNA-templated);GO:0006355(regulation of transcription, DNA-templated);GO:0007275(multicellular organism development)	ENOG4111M0G(No apical meristem (NAM) protein)	NA	NA	NA	NA(NA)	A0A078FUA1.1 PF02365.13;NAM;
A02	BjuA045397	9980970	9982989	1737	G1/G2	unnamed protein product [Brassica rapa]	AAE11	Butyrate--CoA ligase AAE11, peroxisomal OS=Arabidopsis thaliana GN=AAE11 PE=1 SV=1	GO:0005739(mitochondrion);GO:0005777(peroxisome);GO:0019605(butyrate metabolic process);GO:0047760(butyrate-CoA ligase activity)	COG0318(Amp-dependent synthetase and ligase)	NA	NA	NA	NA(NA)	A0A087HFX0.1 PF00501.26;AMP-binding;
A02	BjuA045398	9984861	9987431	1542	G1/G2	unnamed protein product [Brassica rapa]	PAO4	Probable polyamine oxidase 4 OS=Arabidopsis thaliana GN=PAO4 PE=1 SV=1	GO:0005634(nucleus);GO:0005777(peroxisome);GO:0006598(polyamine catabolic process);GO:0008131(primary amine oxidase activity);GO:0046592(polyamine oxidase activity);GO:0052894(norspermine:oxygen oxidoreductase activity);GO:0052895(N1-acetylspermine:oxygen oxidoreductase (N1-acetylspermidine-forming) activity);GO:0052901(spermine:oxygen oxidoreductase (spermidine-forming) activity);GO:0055114(oxid…	ENOG410XSNC(amine oxidase)	K17839	polyamine oxidase	EC:1.5.3.17 1.5.3.-	brp00330(Arginine and proline metabolism);brp00410(beta-Alanine metabolism)	A0A078FTZ1.1 PF01593.22;Amino_oxidase;
A02	BjuA045399	9996070	9996824	438	G1/G2	PREDICTED: microsomal glutathione S-transferase 3 [Brassica rapa]	Mgst3	Microsomal glutathione S-transferase 3 OS=Mus musculus GN=Mgst3 PE=1 SV=1	GO:0004364(glutathione transferase activity);GO:0004602(glutathione peroxidase activity);GO:0005773(vacuole);GO:0005783(endoplasmic reticulum);GO:0005794(Golgi apparatus);GO:0016020(membrane)	ENOG4111URX(microsomal glutathione S-transferase)	K00799	glutathione S-transferase	EC:2.5.1.18	brp00480(Glutathione metabolism)	A0A078H2J1.1 PF01124.16;MAPEG;
A02	BjuA045400	9998779	9999147	369	G1/G2	unnamed protein product [Brassica rapa]	RGA1	DELLA protein RGA1 OS=Brassica campestris GN=RGA1 PE=1 SV=1	GO:0003700(DNA binding transcription factor activity);GO:0005634(nucleus);GO:0006355(regulation of transcription, DNA-templated);GO:0009723(response to ethylene);GO:0009737(response to abscisic acid);GO:0009863(salicylic acid mediated signaling pathway);GO:0009867(jasmonic acid mediated signaling pathway);GO:0009938(negative regulation of gibberellic acid mediated signaling pathway);GO:0010187(ne…	ENOG410YBFY(DELLA protein)	K14494	DELLA protein	-	boe04075(Plant hormone signal transduction)	A0A078FU95.1 PF03514.12;GRAS;
A02	BjuA045401	10000398	10000922	525	G1/G2	hypothetical protein BRARA_B01630 [Brassica rapa]	-	-	GO:0003674(molecular_function);GO:0008150(biological_process);GO:0009507(chloroplast);GO:0016021(integral component of membrane)	ENOG410ZDKI(NA)	-	-	-	-	-
A02	BjuA045402	10003786	10005240	297	G1/G2	PREDICTED: sm-like protein LSM8 [Brassica rapa]	LSM8	Sm-like protein LSM8 OS=Arabidopsis thaliana GN=LSM8 PE=1 SV=1	GO:0000398(mRNA splicing, via spliceosome);GO:0003723(RNA binding);GO:0046540(U4/U6 x U5 tri-snRNP complex)	ENOG41124H7(N(alpha)-acetyltransferase 38, NatC auxiliary)	K12627	U6 snRNA-associated Sm-like protein LSm8	-	brp03040(Spliceosome);brp03018(RNA degradation)	A0A0J8B1X8.1 PF01423.20;LSM;
A02	BjuA045403	10008399	10009384	744	G1/G2	NDR1/HIN1-like protein 6 [Brassica napus]	YLS9	Protein YLS9 OS=Arabidopsis thaliana GN=YLS9 PE=2 SV=1	GO:0003674(molecular_function);GO:0005829(cytosol);GO:0005886(plasma membrane);GO:0006970(response to osmotic stress);GO:0009737(response to abscisic acid);GO:0009738(abscisic acid-activated signaling pathway);GO:0010116(positive regulation of abscisic acid biosynthetic process);GO:0016021(integral component of membrane);GO:1902074(response to salt)	ENOG410YFY3(harpin-induced protein 1 domain containing protein, expressed)	-	-	-	-	A0A078FTY8.1 PF03168.11;LEA_2;
A02	BjuA045404	10026165	10027965	837	G1/G2	unnamed protein product [Brassica rapa]	AAP6	Amino acid permease 6 OS=Arabidopsis thaliana GN=AAP6 PE=1 SV=1	GO:0003333(amino acid transmembrane transport);GO:0005886(plasma membrane);GO:0015171(amino acid transmembrane transporter activity);GO:0015172(acidic amino acid transmembrane transporter activity);GO:0015175(neutral amino acid transmembrane transporter activity);GO:0015293(symporter activity);GO:0015810(aspartate transmembrane transport);GO:0015827(tryptophan transport);GO:0016020(membrane);GO:0…	COG0814(amino acid transport)	NA	NA	NA	NA(NA)	K4BUE2.1 PF01490.16;Aa_trans;
A03	BjuA009679	7400130	7402996	1287	G1/G3	PREDICTED: TBC1 domain family member 15-like isoform X1 [Brassica rapa]	Tbc1d15	TBC1 domain family member 15 OS=Mus musculus GN=Tbc1d15 PE=1 SV=1	GO:0005634(nucleus);GO:0005739(mitochondrion);GO:0006886(intracellular protein transport)	COG5210(TBC1 domain family member)	NA	NA	NA	NA(NA)	A0A078GVS2.1 PF00566.16;RabGAP-TBC;
A03	BjuA009680	7404053	7405791	1056	G1/G3	thiamine thiazole synthase, chloroplastic-like [Brassica napus]	THI1	Thiamine thiazole synthase, chloroplastic OS=Arabidopsis thaliana GN=THI1 PE=1 SV=1	GO:0005506(iron ion binding);GO:0005739(mitochondrion);GO:0005829(cytosol);GO:0005886(plasma membrane);GO:0006974(cellular response to DNA damage stimulus);GO:0008270(zinc ion binding);GO:0009228(thiamine biosynthetic process);GO:0009409(response to cold);GO:0009507(chloroplast);GO:0009570(chloroplast stroma);GO:0009579(thylakoid);GO:0009941(chloroplast envelope);GO:0010319(stromule);GO:0018131(o…	COG1635(Involved in biosynthesis of the thiamine precursor thiazole. Catalyzes the conversion of NAD and glycine to adenosine diphosphate 5-(2-hydroxyethyl)-4-methylthiazole-2-carboxylic acid (ADT), an adenylated thiazole intermediate. The reaction includes an iron-dependent sulfide transfer from a conserved cysteine residue of the protein to a thiazole intermediate. The enzyme can only undergo a…	K03146	cysteine-dependent adenosine diphosphate thiazole synthase	EC:2.4.2.60	bna00730(Thiamine metabolism)	V7BFF7.1 PF01946.15;Thi4;
A03	BjuA009681	7408545	7411502	2280	G1/G3	hypothetical protein BRARA_C01333 [Brassica rapa]	ATG18F	Autophagy-related protein 18f OS=Arabidopsis thaliana GN=ATG18F PE=2 SV=1	GO:0003674(molecular_function);GO:0005737(cytoplasm);GO:0005774(vacuolar membrane);GO:0006914(autophagy);GO:0015031(protein transport);GO:0016192(vesicle-mediated transport);GO:0034045(phagophore assembly site membrane);GO:0042594(response to starvation)	ENOG410XSW7(Breast carcinoma amplified sequence)	-	-	-	-	A0A0D3B3G0.1 PF12490.6;BCAS3;
A03	BjuA009682	7413305	7415113	1407	G1/G3	unnamed protein product [Brassica oleracea]	NPR4	Ankyrin repeat-containing protein NPR4 OS=Oryza sativa subsp. japonica GN=NPR4 PE=2 SV=1	GO:0008150(biological_process);GO:0016021(integral component of membrane)	COG0666(Ankyrin Repeat)	NA	NA	NA	NA(NA)	M4EJP3.1 PF12796.5;Ank_2;
A03	BjuA009683	7420835	7439742	1023	G1/G3	ankyrin repeat-containing protein NPR4-like, partial [Brassica napus]	NPR4	Ankyrin repeat-containing protein NPR4 OS=Oryza sativa subsp. japonica GN=NPR4 PE=2 SV=1	GO:0008150(biological_process);GO:0016021(integral component of membrane)	COG0666(Ankyrin Repeat)	NA	NA	NA	NA(NA)	A0A0D3B3G4.1 PF13962.4;PGG;
A03	BjuA009684	7445103	7445447	345	G1/G3	BnaA02g09490D [Brassica napus]	GAUT12	Probable galacturonosyltransferase 12 OS=Arabidopsis thaliana GN=GAUT12 PE=2 SV=1	GO:0000139(Golgi membrane);GO:0005794(Golgi apparatus);GO:0010413(glucuronoxylan metabolic process);GO:0010417(glucuronoxylan biosynthetic process);GO:0016021(integral component of membrane);GO:0016051(carbohydrate biosynthetic process);GO:0016757(transferase activity, transferring glycosyl groups);GO:0016758(transferase activity, transferring hexosyl groups);GO:0045489(pectin biosynthetic proces…	ENOG410Y9J4(Galacturonosyltransferase)	NA	NA	NA	NA(NA)	A0A078I940.1 PF01501.18;Glyco_transf_8;
A03	BjuA009685	7445494	7446033	465	G1/G3	BnaA03g11730D [Brassica napus]	GAUT12	Probable galacturonosyltransferase 12 OS=Arabidopsis thaliana GN=GAUT12 PE=2 SV=1	GO:0000139(Golgi membrane);GO:0005794(Golgi apparatus);GO:0010413(glucuronoxylan metabolic process);GO:0010417(glucuronoxylan biosynthetic process);GO:0016021(integral component of membrane);GO:0016051(carbohydrate biosynthetic process);GO:0016757(transferase activity, transferring glycosyl groups);GO:0016758(transferase activity, transferring hexosyl groups);GO:0045489(pectin biosynthetic proces…	-	NA	NA	NA	NA(NA)	M4EJP4.1 PF01501.18;Glyco_transf_8;
A03	BjuA009686	7446785	7448046	717	G1/G3	PREDICTED: transcription factor ILR3-like [Brassica rapa]	ILR3	Transcription factor ILR3 OS=Arabidopsis thaliana GN=ILR3 PE=1 SV=1	GO:0003677(DNA binding);GO:0003700(DNA binding transcription factor activity);GO:0005515(protein binding);GO:0005634(nucleus);GO:0006351(transcription, DNA-templated);GO:0006355(regulation of transcription, DNA-templated);GO:0019760(glucosinolate metabolic process);GO:0043565(sequence-specific DNA binding);GO:0046983(protein dimerization activity)	ENOG4111M4Q(Transcription factor)	-	-	-	-	M4EJP5.1 PF00010.24;HLH;
A03	BjuA009687	7451470	7454398	2577	G1/G3	PREDICTED: formin-like protein 5 [Brassica rapa]	FH5	Formin-like protein 5 OS=Arabidopsis thaliana GN=FH5 PE=2 SV=2	GO:0003779(actin binding);GO:0005618(cell wall);GO:0005737(cytoplasm);GO:0005886(plasma membrane);GO:0009524(phragmoplast);GO:0009960(endosperm development);GO:0016021(integral component of membrane);GO:0030041(actin filament polymerization);GO:0045010(actin nucleation);GO:0048317(seed morphogenesis)	ENOG410XQR0(inverted formin, FH2 and WH2 domain containing)	K05740	diaphanous 1	-	ini04933(AGE-RAGE signaling pathway in diabetic complications)	A0A087GB27.1 PF02181.21;FH2;
A03	BjuA009688	7454989	7455866	492	G1/G3	PREDICTED: uncharacterized protein LOC103857032 [Brassica rapa]	-	-	GO:0004857(enzyme inhibitor activity);GO:0043086(negative regulation of catalytic activity);GO:0046910(pectinesterase inhibitor activity)	ENOG411189Z(Invertase pectin methylesterase inhibitor)	-	-	-	-	M4EJP7.1 PF04043.13;PMEI;
A03	BjuA009689	7462174	7462845	672	G1/G3	BnaA03g11780D [Brassica napus]	-	-	GO:0005794(Golgi apparatus);GO:0008150(biological_process)	COG0666(Ankyrin Repeat)	-	-	-	-	V4NAX9.1 PF13962.4;PGG;
A03	BjuA009690	7479117	7479428	312	G1/G3	BnaAnng33650D [Brassica napus]	-	-	GO:0005794(Golgi apparatus);GO:0008150(biological_process)	COG0666(Ankyrin Repeat)	NA	NA	NA	NA(NA)	A0A078JS56.1 PF12796.5;Ank_2;
A03	BjuA009943	9289163	9291037	984	G1/G3	hypothetical protein BRARA_C01599 [Brassica rapa]	At2g31350	Hydroxyacylglutathione hydrolase 2, mitochondrial OS=Arabidopsis thaliana GN=At2g31350 PE=1 SV=1	GO:0004416(hydroxyacylglutathione hydrolase activity);GO:0005506(iron ion binding);GO:0005739(mitochondrion);GO:0008270(zinc ion binding);GO:0009507(chloroplast);GO:0019243(methylglyoxal catabolic process to D-lactate via S-lactoyl-glutathione)	ENOG4111FEZ(Thiolesterase that catalyzes the hydrolysis of S-D- lactoyl-glutathione to form glutathione and D-lactic acid (By similarity))	K01069	hydroxyacylglutathione hydrolase	EC:3.1.2.6	brp00620(Pyruvate metabolism)	A0A078D6J8.1 PF00753.25;Lactamase_B;
A03	BjuA009944	9296623	9298776	1656	G1/G3	hypothetical protein BRARA_C01597 [Brassica rapa]	CDT1A	CDT1-like protein a, chloroplastic OS=Arabidopsis thaliana GN=CDT1A PE=1 SV=1	GO:0000076(DNA replication checkpoint);GO:0004693(cyclin-dependent protein serine/threonine kinase activity);GO:0005515(protein binding);GO:0005634(nucleus);GO:0006260(DNA replication);GO:0007049(cell cycle);GO:0009507(chloroplast);GO:0009658(chloroplast organization);GO:0019901(protein kinase binding);GO:0048229(gametophyte development);GO:0051276(chromosome organization);GO:0070182(DNA polymera…	ENOG410XT37(Chromatin licensing and DNA replication factor 1)	NA	NA	NA	NA(NA)	A0A078GH28.1 PF08839.9;CDT1;
A03	BjuA009945	9308415	9308708	294	G1/G3	PREDICTED: delta-9 acyl-lipid desaturase 2-like [Brassica rapa]	ADS2	Delta-9 acyl-lipid desaturase 2 OS=Arabidopsis thaliana GN=ADS2 PE=2 SV=2	GO:0005783(endoplasmic reticulum);GO:0005789(endoplasmic reticulum membrane);GO:0006636(unsaturated fatty acid biosynthetic process);GO:0016021(integral component of membrane);GO:0016491(oxidoreductase activity);GO:0016717(oxidoreductase activity, acting on paired donors, with oxidation of a pair of donors resulting in the reduction of molecular oxygen to two molecules of water);GO:0042761(very l…	COG1398(desaturase)	NA	NA	NA	NA(NA)	M4DYY9.1 PF00487.22;FA_desaturase;
A03	BjuA009946	9316624	9318082	531	G1/G3	unnamed protein product [Brassica rapa]	BBX25	B-box zinc finger protein 25 OS=Arabidopsis thaliana GN=BBX25 PE=1 SV=2	GO:0003700(DNA binding transcription factor activity);GO:0005515(protein binding);GO:0005634(nucleus);GO:0006351(transcription, DNA-templated);GO:0006355(regulation of transcription, DNA-templated);GO:0008270(zinc ion binding);GO:0010100(negative regulation of photomorphogenesis);GO:0019904(protein domain specific binding)	-	-	-	-	-	-
A03	BjuA009947	9318317	9320697	1026	G1/G3	PREDICTED: probable fructokinase-1 [Brassica oleracea var. oleracea]	At2g31390	Probable fructokinase-1 OS=Arabidopsis thaliana GN=At2g31390 PE=2 SV=1	GO:0005524(ATP binding);GO:0005794(Golgi apparatus);GO:0005829(cytosol);GO:0005886(plasma membrane);GO:0006000(fructose metabolic process);GO:0008865(fructokinase activity);GO:0016301(kinase activity);GO:0019252(starch biosynthetic process)	COG0524(pfkb domain protein)	K00847	fructokinase	EC:2.7.1.4	boe00051(Fructose and mannose metabolism);boe00500(Starch and sucrose metabolism);boe00520(Amino sugar and nucleotide sugar metabolism)	M4E239.1 PF00294.22;PfkB;
A03	BjuA009948	9322886	9323290	288	G1/G3	unnamed protein product [Brassica rapa]	At2g31400	Pentatricopeptide repeat-containing protein At2g31400, chloroplastic OS=Arabidopsis thaliana GN=At2g31400 PE=2 SV=1	GO:0003677(DNA binding);GO:0003723(RNA binding);GO:0004519(endonuclease activity);GO:0009451(RNA modification);GO:0009507(chloroplast);GO:0010019(chloroplast-nucleus signaling pathway);GO:0031930(mitochondria-nucleus signaling pathway)	ENOG4111X81(NA)	-	-	-	-	A0A078FR70.1 PF01713.19;Smr;
A03	BjuA009949	9323427	9324406	666	G1/G3	hypothetical protein BRARA_D01909 [Brassica rapa]	At2g31400	Pentatricopeptide repeat-containing protein At2g31400, chloroplastic OS=Arabidopsis thaliana GN=At2g31400 PE=2 SV=1	GO:0003677(DNA binding);GO:0003723(RNA binding);GO:0004519(endonuclease activity);GO:0009451(RNA modification);GO:0009507(chloroplast);GO:0010019(chloroplast-nucleus signaling pathway);GO:0031930(mitochondria-nucleus signaling pathway)	ENOG410Z7Z7(Pentatricopeptide repeat-containing protein)	NA	NA	NA	NA(NA)	A0A0E0K1X1.1 PF03879.12;Cgr1;
A03	BjuA009950	9328744	9329211	351	G1/G3	unnamed protein product [Brassica rapa]	At2g31400	Pentatricopeptide repeat-containing protein At2g31400, chloroplastic OS=Arabidopsis thaliana GN=At2g31400 PE=2 SV=1	GO:0003677(DNA binding);GO:0003723(RNA binding);GO:0004519(endonuclease activity);GO:0009451(RNA modification);GO:0009507(chloroplast);GO:0010019(chloroplast-nucleus signaling pathway);GO:0031930(mitochondria-nucleus signaling pathway)	ENOG410Z7Z7(Pentatricopeptide repeat-containing protein)	-	-	-	-	A0A078FR70.1 PF01713.19;Smr;
A03	BjuA009951	9330194	9330784	591	G1/G3	PREDICTED: uncharacterized protein LOC103857372 [Brassica rapa]	-	-	GO:0003674(molecular_function);GO:0005634(nucleus);GO:0008150(biological_process)	ENOG4111X81(NA)	NA	NA	NA	NA(NA)	A0A078GH23.1 PF03879.12;Cgr1;
A03	BjuA009952	9333186	9334969	687	G1/G3	gamma-secretase subunit APH1-like [Brassica napus]	At2g31440	Gamma-secretase subunit APH1-like OS=Arabidopsis thaliana GN=At2g31440 PE=2 SV=2	GO:0004175(endopeptidase activity);GO:0005783(endoplasmic reticulum);GO:0005887(integral component of plasma membrane);GO:0007219(Notch signaling pathway);GO:0016485(protein processing);GO:0043085(positive regulation of catalytic activity);GO:0070765(gamma-secretase complex)	ENOG4111FIJ(anterior pharynx defective 1 homolog)	-	-	-	-	A0A087GMW1.1 PF06105.10;Aph-1;
A03	BjuA009953	9339749	9342503	1308	G1/G3	PREDICTED: endonuclease III homolog 1, chloroplastic isoform X8 [Brassica rapa]	NTH1	Endonuclease III homolog 1, chloroplastic OS=Arabidopsis thaliana GN=NTH1 PE=2 SV=2	GO:0000703(oxidized pyrimidine nucleobase lesion DNA N-glycosylase activity);GO:0003677(DNA binding);GO:0003906(DNA-(apurinic or apyrimidinic site) lyase activity);GO:0005634(nucleus);GO:0005739(mitochondrion);GO:0006284(base-excision repair);GO:0006285(base-excision repair, AP site formation);GO:0006296(nucleotide-excision repair, DNA incision, 5'-to lesion);GO:0019104(DNA N-glycosylase activity…	COG0177(endonuclease III)	K10773	endonuclease III	EC:4.2.99.18	brp03410(Base excision repair)	A0A078D8Y9.1 PF00730.23;HhH-GPD;
A03	BjuA009954	9343996	9346353	1746	G1/G3	unnamed protein product [Brassica rapa]	CPK24	Calcium-dependent protein kinase 24 OS=Arabidopsis thaliana GN=CPK24 PE=2 SV=1	GO:0004672(protein kinase activity);GO:0004683(calmodulin-dependent protein kinase activity);GO:0005509(calcium ion binding);GO:0005515(protein binding);GO:0005516(calmodulin binding);GO:0005524(ATP binding);GO:0005634(nucleus);GO:0005737(cytoplasm);GO:0005886(plasma membrane);GO:0006468(protein phosphorylation);GO:0009738(abscisic acid-activated signaling pathway);GO:0009931(calcium-dependent pr…	ENOG410XRMJ(calcium-dependent protein kinase)	K13412	calcium-dependent protein kinase	EC:2.7.11.1	brp04626(Plant-pathogen interaction)	A0A078HAJ6.1 PF00069.23;Pkinase;
A03	BjuA009955	9348915	9355579	1905	G1/G3	hypothetical protein BRARA_C01609 [Brassica rapa]	SCY2	Preprotein translocase subunit SCY2, chloroplastic OS=Arabidopsis thaliana GN=SCY2 PE=2 SV=1	GO:0005886(plasma membrane);GO:0009306(protein secretion);GO:0009526(plastid envelope);GO:0009658(chloroplast organization);GO:0009793(embryo development ending in seed dormancy);GO:0010027(thylakoid membrane organization);GO:0015450(P-P-bond-hydrolysis-driven protein transmembrane transporter activity);GO:0016020(membrane);GO:0072598(protein localization to chloroplast)	COG0201(The central subunit of the protein translocation channel SecYEG. Consists of two halves formed by TMs 1-5 and 6-10. These two domains form a lateral gate at the front which open onto the bilayer between TMs 2 and 7, and are clamped together by SecE at the back. The channel is closed by both a pore ring composed of hydrophobic SecY resides and a short helix (helix 2A) on the extracellular …	NA	NA	NA	NA(NA)	A0A078GEW3.1 PF00344.18;SecY;
A03	BjuA009956	9356595	9356954	360	G1/G3	uncharacterized protein LOC106443445 [Brassica napus]	-	-	GO:0003674(molecular_function);GO:0005739(mitochondrion);GO:0005886(plasma membrane);GO:0008150(biological_process)	ENOG410Z3AX(NA)	-	-	-	-	-
A03	BjuA009957	9365953	9366881	786	G1/G3	unnamed protein product [Brassica rapa]	At2g31550	GDSL esterase/lipase At2g31550 OS=Arabidopsis thaliana GN=At2g31550 PE=3 SV=3	GO:0005576(extracellular region);GO:0016042(lipid catabolic process);GO:0016788(hydrolase activity, acting on ester bonds);GO:0052689(carboxylic ester hydrolase activity)	COG3240(GDSL esterase lipase)	NA	NA	NA	NA(NA)	A0A0D3B4E9.1 PF00657.20;Lipase_GDSL;
A03	BjuA009958	9374187	9374868	564	G1/G3	PREDICTED: uncharacterized protein LOC106334421 [Brassica oleracea var. oleracea]	-	-	GO:0003674(molecular_function);GO:0005634(nucleus)	ENOG410Z7Z7(Pentatricopeptide repeat-containing protein)	-	-	-	-	A0A078D8Y0.1 PF07939.9;DUF1685;
A03	BjuA009959	9375787	9377428	507	G1/G3	probable glutathione peroxidase 2 [Brassica napus]	GPX2	Probable glutathione peroxidase 2 OS=Arabidopsis thaliana GN=GPX2 PE=1 SV=1	GO:0004602(glutathione peroxidase activity);GO:0005515(protein binding);GO:0005634(nucleus);GO:0005739(mitochondrion);GO:0005829(cytosol);GO:0005886(plasma membrane);GO:0006979(response to oxidative stress);GO:0055114(oxidation-reduction process)	COG0386(glutathione peroxidase)	K00432	glutathione peroxidase	EC:1.11.1.9	bna00590(Arachidonic acid metabolism);bna00480(Glutathione metabolism)	D7LDM4.1 PF00255.17;GSHPx;
A03	BjuA009960	9378620	9388318	1482	G1/G3	putative B3 domain-containing protein REM15 isoform X1 [Brassica napus]	REM14	B3 domain-containing protein REM14 OS=Arabidopsis thaliana GN=REM14 PE=2 SV=2	GO:0003677(DNA binding);GO:0003700(DNA binding transcription factor activity);GO:0005634(nucleus);GO:0006351(transcription, DNA-templated);GO:0006355(regulation of transcription, DNA-templated);GO:0009793(embryo development ending in seed dormancy)	ENOG410ZEPY(B3 domain-containing protein)	-	-	-	-	A0A078D6N1.1 PF02362.19;B3;
A03	BjuA009961	9388976	9392246	1575	G1/G3	tRNA(His) guanylyltransferase 1-like [Brassica napus]	THG1	tRNA(His) guanylyltransferase 1 OS=Arabidopsis thaliana GN=THG1 PE=1 SV=1	GO:0000086(G2/M transition of mitotic cell cycle);GO:0005737(cytoplasm);GO:0006974(cellular response to DNA damage stimulus);GO:0008033(tRNA processing);GO:0008193(tRNA guanylyltransferase activity);GO:0008283(cell proliferation)	COG4021(guanylyltransferase)	NA	NA	NA	NA(NA)	A0A078GF14.1 PF04446.10;Thg1;
A03	BjuA009962	9393906	9395498	858	G1/G3	INO80 complex subunit D-like [Brassica napus]	-	-	GO:0000123(histone acetyltransferase complex);GO:0009507(chloroplast)	ENOG410Y1DG(NA)	NA	NA	NA	NA(NA)	A0A078DBS7.1 PF13891.4;zf-C3Hc3H;
A03	BjuA009963	9396986	9398274	903	G1/G3	E3 ubiquitin-protein ligase SINA-like 2 [Brassica napus]	At1g66620	E3 ubiquitin-protein ligase SINA-like 2 OS=Arabidopsis thaliana GN=At1g66620 PE=2 SV=1	GO:0005634(nucleus);GO:0006511(ubiquitin-dependent protein catabolic process);GO:0007275(multicellular organism development);GO:0008270(zinc ion binding);GO:0016567(protein ubiquitination)	ENOG410XVP0(e3 ubiquitin-protein ligase)	K04506	E3 ubiquitin-protein ligase SIAH1	EC:2.3.2.27	bna04120(Ubiquitin mediated proteolysis)	M4E258.1 PF03145.14;Sina;
A03	BjuA009964	9399963	9401443	750	G1/G3	hypothetical protein BRARA_C01619 [Brassica rapa]	RPS3B	40S ribosomal protein S3-2 OS=Arabidopsis thaliana GN=RPS3B PE=1 SV=1	GO:0003729(mRNA binding);GO:0003735(structural constituent of ribosome);GO:0005634(nucleus);GO:0005737(cytoplasm);GO:0005794(Golgi apparatus);GO:0006412(translation);GO:0009506(plasmodesma);GO:0009651(response to salt stress);GO:0016020(membrane);GO:0022626(cytosolic ribosome);GO:0022627(cytosolic small ribosomal subunit)	COG0092(Binds the lower part of the 30S subunit head. Binds mRNA in the 70S ribosome, positioning it for translation (By similarity))	K02985	small subunit ribosomal protein S3e	-	bna03010(Ribosome)	A0A078FRB1.1 PF00189.18;Ribosomal_S3_C;
A03	BjuA009965	9402432	9409348	3129	G1/G3	hypothetical protein BRARA_C01620 [Brassica rapa]	SAD2	Importin beta-like SAD2 OS=Arabidopsis thaliana GN=SAD2 PE=1 SV=1	GO:0005634(nucleus);GO:0005635(nuclear envelope);GO:0005643(nuclear pore);GO:0005737(cytoplasm);GO:0005829(cytosol);GO:0006606(protein import into nucleus);GO:0007165(signal transduction);GO:0035280(miRNA loading onto RISC involved in gene silencing by miRNA)	COG5656(Importin)	NA	NA	NA	NA(NA)	R0HRC4.1 PF03378.13;CAS_CSE1;
A03	BjuA009966	9421204	9422585	315	G1/G3	unnamed protein product [Brassica rapa]	-	-	GO:0003674(molecular_function);GO:0005789(endoplasmic reticulum membrane);GO:0009507(chloroplast);GO:0012507(ER to Golgi transport vesicle membrane);GO:0016021(integral component of membrane);GO:0033116(endoplasmic reticulum-Golgi intermediate compartment membrane)	ENOG410YRG3(ethylene-responsive protein)	-	-	-	-	M4E263.1 PF09446.8;VMA21;
A03	BjuA009967	9431523	9433336	1359	G1/G3	UDP-glycosyltransferase 74D1-like [Brassica napus]	UGT74D1	UDP-glycosyltransferase 74D1 OS=Arabidopsis thaliana GN=UGT74D1 PE=1 SV=1	GO:0008152(metabolic process);GO:0008194(UDP-glycosyltransferase activity);GO:0009850(auxin metabolic process);GO:0010294(abscisic acid glucosyltransferase activity);GO:0016757(transferase activity, transferring glycosyl groups);GO:0016758(transferase activity, transferring hexosyl groups);GO:0043231(intracellular membrane-bounded organelle);GO:0052638(indole-3-butyrate beta-glucosyltransferase a…	COG1819(Transferase)	NA	NA	NA	NA(NA)	M4E264.1 PF00201.16;UDPGT;
A03	BjuA009968	9435820	9437512	1572	G1/G3	unnamed protein product [Brassica rapa]	ARI11	Probable E3 ubiquitin-protein ligase ARI11 OS=Arabidopsis thaliana GN=ARI11 PE=2 SV=1	GO:0000151(ubiquitin ligase complex);GO:0000209(protein polyubiquitination);GO:0005737(cytoplasm);GO:0031624(ubiquitin conjugating enzyme binding);GO:0032436(positive regulation of proteasomal ubiquitin-dependent protein catabolic process);GO:0046872(metal ion binding);GO:0061630(ubiquitin protein ligase activity)	ENOG410XP9Y(RING finger) protein)	NA	NA	NA	NA(NA)	A0A0D3B4G5.1 PF01485.19;IBR;
A03	BjuA009969	9438052	9442130	1305	G1/G3	serine/threonine-protein kinase HT1-like [Brassica napus]	STY46	Serine/threonine-protein kinase STY46 OS=Arabidopsis thaliana GN=STY46 PE=1 SV=1	GO:0004674(protein serine/threonine kinase activity);GO:0004712(protein serine/threonine/tyrosine kinase activity);GO:0005524(ATP binding);GO:0005737(cytoplasm);GO:0007229(integrin-mediated signaling pathway);GO:0016301(kinase activity);GO:0046777(protein autophosphorylation)	COG0515(Serine Threonine protein kinase)	NA	NA	NA	NA(NA)	A0A078CQH4.1 PF07714.15;Pkinase_Tyr;
A03	BjuA009970	9443776	9447473	1407	G1/G3	unnamed protein product [Brassica rapa]	At2g31810	Acetolactate synthase small subunit 2, chloroplastic OS=Arabidopsis thaliana GN=At2g31810 PE=1 SV=1	GO:0005515(protein binding);GO:0005777(peroxisome);GO:0005829(cytosol);GO:0009082(branched-chain amino acid biosynthetic process);GO:0009097(isoleucine biosynthetic process);GO:0009099(valine biosynthetic process);GO:0009507(chloroplast);GO:0043621(protein self-association);GO:0050790(regulation of catalytic activity)	COG0440(Acetolactate synthase small subunit)	K01653	acetolactate synthase I/III small subunit	EC:2.2.1.6	brp00650(Butanoate metabolism);brp00660(C5-Branched dibasic acid metabolism);brp00290(Valine, leucine and isoleucine biosynthesis);brp00770(Pantothenate and CoA biosynthesis)	M4CN52.1 PF10369.7;ALS_ss_C;
A03	BjuA009971	9447713	9449652	993	G1/G3	thioredoxin-like fold domain-containing protein MRL7L, chloroplastic isoform X1 [Brassica napus]	-	-	GO:0006355(regulation of transcription, DNA-templated);GO:0009507(chloroplast);GO:0009570(chloroplast stroma);GO:0009658(chloroplast organization)	ENOG410YAAY(NA)	-	-	-	-	-
A03	BjuA009972	9452768	9454690	1923	G1/G3	unnamed protein product [Brassica rapa]	SOBIR1	Leucine-rich repeat receptor-like serine/threonine/tyrosine-protein kinase SOBIR1 OS=Arabidopsis thaliana GN=SOBIR1 PE=1 SV=1	GO:0004674(protein serine/threonine kinase activity);GO:0004713(protein tyrosine kinase activity);GO:0004714(transmembrane receptor protein tyrosine kinase activity);GO:0005515(protein binding);GO:0005524(ATP binding);GO:0005886(plasma membrane);GO:0006468(protein phosphorylation);GO:0006952(defense response);GO:0007169(transmembrane receptor protein tyrosine kinase signaling pathway);GO:0010942(…	COG0515(Serine Threonine protein kinase)	NA	NA	NA	NA(NA)	A0A078D8V9.1 PF00069.23;Pkinase;
A03	BjuA009973	9467625	9469445	1119	G1/G3	PREDICTED: cyclic pyranopterin monophosphate synthase, mitochondrial [Brassica rapa]	CNX2	GTP 3',8-cyclase, mitochondrial OS=Arabidopsis thaliana GN=CNX2 PE=1 SV=1	GO:0003824(catalytic activity);GO:0005525(GTP binding);GO:0005739(mitochondrion);GO:0005759(mitochondrial matrix);GO:0006777(Mo-molybdopterin cofactor biosynthetic process);GO:0009507(chloroplast);GO:0019008(molybdopterin synthase complex);GO:0046872(metal ion binding);GO:0051539(4 iron, 4 sulfur cluster binding);GO:0061798(GTP 3',8'-cyclase activity)	COG2896(Catalyzes, together with MoaC, the conversion of 5'-GTP to cyclic pyranopterin monophosphate (cPMP or molybdopterin precursor Z) (By similarity))	K03639	GTP 3',8-cyclase	EC:4.1.99.22	ath00790(Folate biosynthesis);ath04122(Sulfur relay system)	A0A078CRS9.1 PF04055.19;Radical_SAM;
A03	BjuA010031	9878551	9890366	5046	G1/G2	unnamed protein product [Brassica rapa]	XI-D	Myosin-10 OS=Arabidopsis thaliana GN=XI-D PE=3 SV=1	GO:0003774(motor activity);GO:0005794(Golgi apparatus);GO:0016459(myosin complex);GO:0030048(actin filament-based movement)	COG5022(myosin heavy chain)	NA	NA	NA	NA(NA)	A0A078G459.1 PF00063.19;Myosin_head;
A03	BjuA010032	9877267	9878385	726	G1/G2	hypothetical protein BRARA_C01700 [Brassica rapa]	IAA13	Auxin-responsive protein IAA13 OS=Arabidopsis thaliana GN=IAA13 PE=1 SV=2	GO:0003700(DNA binding transcription factor activity);GO:0005515(protein binding);GO:0005634(nucleus);GO:0006351(transcription, DNA-templated);GO:0006355(regulation of transcription, DNA-templated);GO:0009733(response to auxin);GO:0009734(auxin-activated signaling pathway)	ENOG410YK71(auxin-responsive protein)	K14484	auxin-responsive protein IAA	-	brp04075(Plant hormone signal transduction)	M4E2D4.1 PF02309.14;AUX_IAA;
A03	BjuA010033	9862457	9864093	1560	G1/G2	uncharacterized protein LOC106437795 [Brassica napus]	-	-	GO:0003674(molecular_function);GO:0005634(nucleus);GO:0005773(vacuole);GO:0008150(biological_process)	ENOG410YDX0(expressed protein)	-	-	-	-	A0A078CWM0.1 PF12043.6;DUF3527;
A03	BjuA010034	9860281	9861831	624	G1/G2	probable peroxygenase 3 [Brassica napus]	PXG3	Probable peroxygenase 3 OS=Arabidopsis thaliana GN=PXG3 PE=1 SV=1	GO:0005509(calcium ion binding);GO:0005773(vacuole);GO:0005783(endoplasmic reticulum);GO:0009269(response to desiccation);GO:0009409(response to cold);GO:0009620(response to fungus);GO:0009651(response to salt stress);GO:0009737(response to abscisic acid);GO:0009751(response to salicylic acid);GO:0010118(stomatal movement);GO:0012511(monolayer-surrounded lipid storage body);GO:0031407(oxylipin me…	ENOG4111R51(Calcium-binding peroxygenase involved in the degradation of storage lipid in oil bodies. May be involved in the interaction between oil bodies and vacuoles during seed germination and in the oxylipin signaling pathways and plant defense responses. Can catalyze sulfoxidation of thiobenzamide, hydroxylation of aniline)	K17991	peroxygenase	EC:1.11.2.3	bna00073(Cutin, suberine and wax biosynthesis)	A0A0D3B4P8.1 PF05042.11;Caleosin;
A03	BjuA010035	9857757	9857972	216	G1/G2	PREDICTED: uncharacterized protein LOC103857487 isoform X1 [Brassica rapa]	-	-	GO:0003674(molecular_function);GO:0005634(nucleus);GO:0009642(response to light intensity)	ENOG410ZBDE(NA)	-	-	-	-	-
A03	BjuA010036	9853527	9855062	1227	G1/G2	PREDICTED: heterogeneous nuclear ribonucleoprotein 1-like [Brassica rapa]	RNP1	Heterogeneous nuclear ribonucleoprotein 1 OS=Arabidopsis thaliana GN=RNP1 PE=1 SV=1	GO:0003723(RNA binding);GO:0003729(mRNA binding);GO:0005575(cellular_component);GO:0008150(biological_process)	ENOG410YA8Z(Rna-binding protein)	K14411	RNA-binding protein Musashi	-	brp03015(mRNA surveillance pathway)	A0A0D3C3X3.1 PF00076.20;RRM_1;
A03	BjuA010037	9845606	9846751	1146	G1/G2	putative F-box/kelch-repeat protein At1g20940 [Brassica napus]	At1g20940	Putative F-box/kelch-repeat protein At1g20940 OS=Arabidopsis thaliana GN=At1g20940 PE=4 SV=1	GO:0005739(mitochondrion)	ENOG4110614(NA)	-	-	-	-	M4E2E0.1 PF00646.31;F-box;
A03	BjuA010038	9840509	9842440	1932	G1/G2	PREDICTED: titin homolog isoform X1 [Brassica rapa]	-	-	GO:0003723(RNA binding);GO:0005634(nucleus);GO:0008150(biological_process)	ENOG410XP92(splicing factor (U2AF))	K12837	splicing factor U2AF 65 kDa subunit	-	aly03040(Spliceosome)	-
A03	BjuA010039	9834518	9834925	318	G1/G2	unnamed protein product [Brassica rapa]	RIC1	CRIB domain-containing protein RIC1 OS=Arabidopsis thaliana GN=RIC1 PE=1 SV=1	GO:0000902(cell morphogenesis);GO:0005515(protein binding);GO:0009860(pollen tube growth);GO:0010005(cortical microtubule, transverse to long axis);GO:0010215(cellulose microfibril organization);GO:0016324(apical plasma membrane);GO:0031122(cytoplasmic microtubule organization)	-	-	-	-	-	-
A03	BjuA010040	9827882	9829372	534	G1/G2	PREDICTED: uncharacterized protein LOC103857492 [Brassica rapa]	-	-	GO:0004386(helicase activity);GO:0005634(nucleus);GO:0008150(biological_process)	ENOG410YURX(NA)	-	-	-	-	M0RQU1.1 PF00397.24;WW;
A03	BjuA010041	9821463	9823593	1485	G1/G2	hypothetical protein BRARA_C01709 [Brassica rapa]	GALS1	Galactan beta-1,4-galactosyltransferase GALS1 OS=Arabidopsis thaliana GN=GALS1 PE=2 SV=2	GO:0000139(Golgi membrane);GO:0005794(Golgi apparatus);GO:0016021(integral component of membrane);GO:0042546(cell wall biogenesis);GO:0045489(pectin biosynthetic process);GO:0048531(beta-1,3-galactosyltransferase activity);GO:0071555(cell wall organization)	ENOG410Z7P2(UPF0392 protein)	-	-	-	-	M4E2E4.1 PF01697.25;Glyco_transf_92;
A03	BjuA010042	9820025	9820471	288	G1/G2	PREDICTED: uncharacterized protein LOC103857496 [Brassica rapa]	-	-	GO:0003674(molecular_function);GO:0005739(mitochondrion);GO:0008150(biological_process)	ENOG410YPTJ(NA)	-	-	-	-	-
A03	BjuA010043	9811983	9813907	1443	G1/G2	short-chain dehydrogenase/reductase family 42E member 1-like [Brassica napus]	SDR42E1	Short-chain dehydrogenase/reductase family 42E member 1 OS=Macaca fascicularis GN=SDR42E1 PE=2 SV=1	GO:0003854(3-beta-hydroxy-delta5-steroid dehydrogenase activity);GO:0005783(endoplasmic reticulum);GO:0006694(steroid biosynthetic process);GO:0016021(integral component of membrane);GO:0055114(oxidation-reduction process)	COG0451(Nad-dependent epimerase dehydratase)	K07748	sterol-4alpha-carboxylate 3-dehydrogenase (decarboxylating)	EC:1.1.1.170	zma00100(Steroid biosynthesis)	A0A087GMC7.1 PF01073.17;3Beta_HSD;
A03	BjuA010044	9810163	9810790	543	G1/G2	PREDICTED: uncharacterized protein LOC103857499 [Brassica rapa]	-	-	-	-	-	-	-	-	-
A03	BjuA010045	9804597	9805110	441	G1/G2	heat stress transcription factor A-4a-like [Brassica napus]	HSFA4A	Heat stress transcription factor A-4a OS=Arabidopsis thaliana GN=HSFA4A PE=2 SV=1	GO:0000302(response to reactive oxygen species);GO:0003677(DNA binding);GO:0003700(DNA binding transcription factor activity);GO:0005515(protein binding);GO:0005634(nucleus);GO:0005737(cytoplasm);GO:0006351(transcription, DNA-templated);GO:0006355(regulation of transcription, DNA-templated);GO:0010200(response to chitin);GO:0042803(protein homodimerization activity);GO:0043565(sequence-specific D…	-	NA	NA	NA	NA(NA)	A0A078D6G1.1 PF00447.15;HSF_DNA-bind;
A03	BjuA010046	9801418	9801630	213	G1/G2	PREDICTED: uncharacterized protein LOC103857502 [Brassica rapa]	-	-	GO:0003674(molecular_function);GO:0005829(cytosol);GO:0008150(biological_process)	ENOG410Z43V(late embryogenesis abundant protein)	-	-	-	-	A0A078D8L8.1 PF10714.7;LEA_6;
A03	BjuA010047	9795149	9796048	900	G1/G2	PREDICTED: B3 domain-containing protein At2g33720-like [Brassica rapa]	At2g33720	B3 domain-containing protein At2g33720 OS=Arabidopsis thaliana GN=At2g33720 PE=2 SV=1	GO:0003677(DNA binding);GO:0003700(DNA binding transcription factor activity);GO:0005634(nucleus);GO:0006351(transcription, DNA-templated);GO:0006355(regulation of transcription, DNA-templated)	ENOG4111D7C(Transcription factor)	-	-	-	-	A0A059C6I2.1 PF02362.19;B3;
A03	BjuA010048	9794019	9794789	771	G1/G2	hypothetical protein BRARA_C01717 [Brassica rapa]	RH21	DEAD-box ATP-dependent RNA helicase 21 OS=Arabidopsis thaliana GN=RH21 PE=2 SV=1	GO:0003723(RNA binding);GO:0005524(ATP binding);GO:0005634(nucleus);GO:0005682(U5 snRNP);GO:0005737(cytoplasm);GO:0006397(mRNA processing);GO:0008026(ATP-dependent helicase activity);GO:0071013(catalytic step 2 spliceosome)	ENOG410XNVG(ATP-dependent RNA helicase involved in mRNA splicing. May destabilize the U1 5'-splice site duplex to permit an effective competition for the 5'-splice site by the U6 snRNA, resulting in the switch between U1 and U6 at the 5'-splice site. May also act to unwind the U4 U6 base-pairing interaction in the U4 U6 U5 snRNP, facilitating the first covalent step of splicing)	K12858	ATP-dependent RNA helicase DDX23/PRP28	EC:3.6.4.13	brp03040(Spliceosome)	A0A078CQW9.1 PF00271.29;Helicase_C;
A03	BjuA010049	9792870	9793982	1113	G1/G2	PREDICTED: DEAD-box ATP-dependent RNA helicase 21-like [Brassica rapa]	RH21	DEAD-box ATP-dependent RNA helicase 21 OS=Arabidopsis thaliana GN=RH21 PE=2 SV=1	GO:0003723(RNA binding);GO:0005524(ATP binding);GO:0005634(nucleus);GO:0005682(U5 snRNP);GO:0005737(cytoplasm);GO:0006397(mRNA processing);GO:0008026(ATP-dependent helicase activity);GO:0071013(catalytic step 2 spliceosome)	ENOG410XNVG(ATP-dependent RNA helicase involved in mRNA splicing. May destabilize the U1 5'-splice site duplex to permit an effective competition for the 5'-splice site by the U6 snRNA, resulting in the switch between U1 and U6 at the 5'-splice site. May also act to unwind the U4 U6 base-pairing interaction in the U4 U6 U5 snRNP, facilitating the first covalent step of splicing)	K12858	ATP-dependent RNA helicase DDX23/PRP28	EC:3.6.4.13	brp03040(Spliceosome)	A0A0D3B4R5.1 PF00270.27;DEAD;
A03	BjuA010050	9790980	9792191	1212	G1/G2	PREDICTED: F-box/kelch-repeat protein At4g39560-like [Brassica rapa]	At4g39600	Putative F-box/kelch-repeat protein At4g39600 OS=Arabidopsis thaliana GN=At4g39600 PE=4 SV=1	GO:0003674(molecular_function);GO:0005634(nucleus);GO:0008150(biological_process)	ENOG4110X8D(Kelch repeat-containing F-box family protein)	-	-	-	-	A0A078CS38.1 PF01344.23;Kelch_1;
A03	BjuA010051	9786205	9786525	321	G1/G2	PREDICTED: squamosa promoter-binding-like protein 3 [Brassica rapa]	SPL3	Squamosa promoter-binding-like protein 3 OS=Arabidopsis thaliana GN=SPL3 PE=1 SV=2	GO:0003677(DNA binding);GO:0003700(DNA binding transcription factor activity);GO:0005634(nucleus);GO:0005737(cytoplasm);GO:0006351(transcription, DNA-templated);GO:0006355(regulation of transcription, DNA-templated);GO:0009908(flower development);GO:0009911(positive regulation of flower development);GO:0010228(vegetative to reproductive phase transition of meristem);GO:0010229(inflorescence devel…	ENOG410ZM8F(squamosa promoter-binding protein 1-like)	-	-	-	-	A0A0D3B4R8.1 PF03110.12;SBP;
A03	BjuA010052	9782770	9783305	327	G1/G2	hypothetical protein BRARA_C01720 [Brassica rapa]	DRMH1	Dormancy-associated protein homolog 1 OS=Arabidopsis thaliana GN=DRMH1 PE=1 SV=1	GO:0005634(nucleus);GO:0007275(multicellular organism development)	ENOG410YV4V(Auxin-repressed 12.5 kDa)	-	-	-	-	A0A0D3B4R9.1 PF05564.10;Auxin_repressed;
A03	BjuA010053	9779411	9781468	1698	G1/G2	protein FRIGIDA-ESSENTIAL 1-like [Brassica napus]	FES1	Protein FRIGIDA-ESSENTIAL 1 OS=Arabidopsis thaliana GN=FES1 PE=1 SV=2	GO:0003676(nucleic acid binding);GO:0003677(DNA binding);GO:0005634(nucleus);GO:0009908(flower development);GO:0010220(positive regulation of vernalization response);GO:0030154(cell differentiation);GO:0046872(metal ion binding)	ENOG410YNGS(zinc finger CCCH domain-containing protein)	NA	NA	NA	NA(NA)	-
A03	BjuA010054	9773911	9775285	654	G1/G2	unnamed protein product [Brassica rapa]	RABA1H	Ras-related protein RABA1h OS=Arabidopsis thaliana GN=RABA1H PE=2 SV=1	GO:0003924(GTPase activity);GO:0005525(GTP binding);GO:0005886(plasma membrane);GO:0015031(protein transport);GO:0032482(Rab protein signal transduction)	COG1100(GTP-binding Protein)	NA	NA	NA	NA(NA)	A0A087HRG9.1 PF00071.20;Ras;
A03	BjuA010055	9767947	9770228	1245	G1/G2	unnamed protein product [Brassica rapa]	WOX9	WUSCHEL-related homeobox 9 OS=Arabidopsis thaliana GN=WOX9 PE=2 SV=1	GO:0003700(DNA binding transcription factor activity);GO:0005634(nucleus);GO:0005737(cytoplasm);GO:0006351(transcription, DNA-templated);GO:0006355(regulation of transcription, DNA-templated);GO:0008284(positive regulation of cell proliferation);GO:0009735(response to cytokinin);GO:0009793(embryo development ending in seed dormancy);GO:0010075(regulation of meristem growth);GO:0043565(sequence-sp…	ENOG410Y94H(homeobox)	NA	NA	NA	NA(NA)	U5G185.1 PF00046.27;Homeobox;
A03	BjuA010056	9758381	9760662	1245	G1/G2	unnamed protein product [Brassica rapa]	WOX9	WUSCHEL-related homeobox 9 OS=Arabidopsis thaliana GN=WOX9 PE=2 SV=1	GO:0003700(DNA binding transcription factor activity);GO:0005634(nucleus);GO:0005737(cytoplasm);GO:0006351(transcription, DNA-templated);GO:0006355(regulation of transcription, DNA-templated);GO:0008284(positive regulation of cell proliferation);GO:0009735(response to cytokinin);GO:0009793(embryo development ending in seed dormancy);GO:0010075(regulation of meristem growth);GO:0043565(sequence-sp…	ENOG410Y94H(homeobox)	NA	NA	NA	NA(NA)	U5G185.1 PF00046.27;Homeobox;
A03	BjuA010145	8025146	8029412	1449	G1/G3	unnamed protein product [Brassica rapa]	OVA4	Tryptophan--tRNA ligase, chloroplastic/mitochondrial OS=Arabidopsis thaliana GN=OVA4 PE=1 SV=1	GO:0004812(aminoacyl-tRNA ligase activity);GO:0004830(tryptophan-tRNA ligase activity);GO:0005524(ATP binding);GO:0005737(cytoplasm);GO:0005739(mitochondrion);GO:0006418(tRNA aminoacylation for protein translation);GO:0006436(tryptophanyl-tRNA aminoacylation);GO:0009507(chloroplast);GO:0009570(chloroplast stroma);GO:0016740(transferase activity);GO:0048481(plant ovule development)	COG0180(tryptophanyltRNA synthetase)	K01867	tryptophanyl-tRNA synthetase	EC:6.1.1.2	boe00970(Aminoacyl-tRNA biosynthesis)	A0A0D3C249.1 PF00579.23;tRNA-synt_1b;
A03	BjuA010146	8032083	8036250	1506	G1/G3	PREDICTED: protein REVEILLE 6-like isoform X1 [Brassica rapa]	RVE6	Protein REVEILLE 6 OS=Arabidopsis thaliana GN=RVE6 PE=2 SV=1	GO:0003677(DNA binding);GO:0003700(DNA binding transcription factor activity);GO:0005634(nucleus);GO:0006351(transcription, DNA-templated);GO:0006355(regulation of transcription, DNA-templated);GO:0009651(response to salt stress);GO:0009723(response to ethylene);GO:0009737(response to abscisic acid);GO:0009739(response to gibberellin);GO:0009751(response to salicylic acid);GO:0009753(response to …	ENOG4111HV1(Transcription factor)	K02947	small subunit ribosomal protein S10e	-	brp03010(Ribosome)	V4LHN7.1 PF03501.13;S10_plectin;
A03	BjuA010147	8038485	8039157	597	G1/G3	PREDICTED: transcription factor MYB82-like [Brassica rapa]	MYB82	Transcription factor MYB82 OS=Arabidopsis thaliana GN=MYB82 PE=1 SV=1	GO:0000981(RNA polymerase II transcription factor activity, sequence-specific DNA binding);GO:0001135(transcription factor activity, RNA polymerase II transcription factor recruiting);GO:0003677(DNA binding);GO:0003700(DNA binding transcription factor activity);GO:0005634(nucleus);GO:0006351(transcription, DNA-templated);GO:0006357(regulation of transcription by RNA polymerase II);GO:0007275(mult…	COG5147(Myblike DNAbinding domain containing protein)	NA	NA	NA	NA(NA)	D7MS68.1 PF00249.29;Myb_DNA-binding;
A03	BjuA010148	8044515	8047647	1395	G1/G3	PREDICTED: uncharacterized protein LOC103857121 [Brassica rapa]	yjcL	Uncharacterized membrane protein YjcL OS=Bacillus subtilis (strain 168) GN=yjcL PE=4 SV=1	GO:0009507(chloroplast);GO:0009941(chloroplast envelope);GO:0016021(integral component of membrane)	COG5505(Protein of unknown function (DUF819))	NA	NA	NA	NA(NA)	M4EJZ7.1 PF05684.10;DUF819;
A03	BjuA010149	8049592	8050070	270	G1/G3	PREDICTED: sec-independent protein translocase protein TATB, chloroplastic-like isoform X1 [Brassica rapa]	-	-	-	-	-	-	-	-	-
A03	BjuA010150	8053694	8058678	1914	G1/G3	hypothetical protein BRARA_C01429 [Brassica rapa]	CYP735A2	Cytokinin hydroxylase OS=Arabidopsis thaliana GN=CYP735A2 PE=1 SV=1	GO:0004497(monooxygenase activity);GO:0019825(oxygen binding)	COG2124(Cytochrome p450)	NA	NA	NA	NA(NA)	M4EK00.1 PF00067.20;p450;
A03	BjuA010151	8066113	8073190	1188	G1/G3	BnaA03g12630D [Brassica napus]	ADF12	Actin-depolymerizing factor 12 OS=Arabidopsis thaliana GN=ADF12 PE=2 SV=2	GO:0003779(actin binding);GO:0005622(intracellular);GO:0005634(nucleus);GO:0005737(cytoplasm);GO:0005884(actin filament);GO:0015629(actin cytoskeleton);GO:0030042(actin filament depolymerization)	ENOG410YH1N(PAR1 protein)	NA	NA	NA	NA(NA)	A0A078DQS4.1 PF00241.18;Cofilin_ADF;
A03	BjuA010152	8074970	8076463	1494	G1/G3	alkane hydroxylase MAH1-like [Brassica napus]	CYP96A15	Alkane hydroxylase MAH1 OS=Arabidopsis thaliana GN=CYP96A15 PE=2 SV=1	GO:0004497(monooxygenase activity);GO:0005506(iron ion binding);GO:0005576(extracellular region);GO:0016021(integral component of membrane);GO:0016705(oxidoreductase activity, acting on paired donors, with incorporation or reduction of molecular oxygen);GO:0019825(oxygen binding);GO:0020037(heme binding);GO:0055114(oxidation-reduction process)	COG2124(Cytochrome p450)	K15405	midchain alkane hydroxylase	-	ath00073(Cutin, suberine and wax biosynthesis)	M4EK03.1 PF00067.20;p450;
A03	BjuA010153	8077299	8079042	1572	G1/G3	PREDICTED: low-temperature-induced 65 kDa protein-like [Brassica rapa]	LTI65	Low-temperature-induced 65 kDa protein OS=Arabidopsis thaliana GN=LTI65 PE=2 SV=2	GO:0003674(molecular_function);GO:0005737(cytoplasm);GO:0006950(response to stress);GO:0009409(response to cold);GO:0009414(response to water deprivation);GO:0009651(response to salt stress);GO:0009737(response to abscisic acid);GO:0009738(abscisic acid-activated signaling pathway);GO:0010150(leaf senescence)	ENOG410ZG4Y(low-temperature-induced 65)	-	-	-	-	-
A03	BjuA010154	8088105	8090014	333	G1/G3	BnaC03g15530D [Brassica napus]	-	-	GO:0005515(protein binding);GO:0009507(chloroplast);GO:0009658(chloroplast organization);GO:0031425(chloroplast RNA processing)	COG0457(repeat-containing protein)	-	-	-	-	-
A03	BjuA010155	8092821	8094233	1230	G1/G3	PREDICTED: eukaryotic initiation factor 4A-1-like [Brassica rapa]	TIF4A-1	Eukaryotic initiation factor 4A-1 OS=Arabidopsis thaliana GN=TIF4A-1 PE=1 SV=1	GO:0003676(nucleic acid binding);GO:0003729(mRNA binding);GO:0003743(translation initiation factor activity);GO:0004004(ATP-dependent RNA helicase activity);GO:0004386(helicase activity);GO:0005524(ATP binding);GO:0005730(nucleolus);GO:0005737(cytoplasm);GO:0005774(vacuolar membrane);GO:0005794(Golgi apparatus);GO:0005829(cytosol);GO:0005886(plasma membrane);GO:0006413(translational initiation);G…	COG0513(purine NTP-dependent helicase activity)	K03257	translation initiation factor 4A	-	brp03013(RNA transport)	P41377.1 PF00270.27;DEAD;
A03	BjuA010156	8095723	8096106	384	G1/G3	transcription factor GTE3, chloroplastic-like [Brassica napus]	GTE3	Transcription factor GTE3, chloroplastic OS=Arabidopsis thaliana GN=GTE3 PE=1 SV=1	GO:0003677(DNA binding);GO:0005515(protein binding);GO:0005634(nucleus);GO:0006351(transcription, DNA-templated);GO:0006355(regulation of transcription, DNA-templated);GO:0009507(chloroplast);GO:0016569(covalent chromatin modification);GO:0042393(histone binding)	COG5076(bromodomain)	NA	NA	NA	NA(NA)	M4CV29.1 PF00439.23;Bromodomain;
A03	BjuA010157	8098048	8099417	1113	G1/G3	putative F-box protein At1g70970 [Brassica napus]	At4g11590	F-box protein At4g11590 OS=Arabidopsis thaliana GN=At4g11590 PE=1 SV=1	GO:0003674(molecular_function);GO:0005634(nucleus);GO:0016567(protein ubiquitination)	-	-	-	-	-	A0A078H585.1 PF08268.10;FBA_3;
A03	BjuA010158	8102338	8108286	4815	G1/G3	protein SHORTAGE IN CHIASMATA 1-like [Brassica napus]	SHOC1	Protein SHORTAGE IN CHIASMATA 1 OS=Arabidopsis thaliana GN=SHOC1 PE=1 SV=1	GO:0000712(resolution of meiotic recombination intermediates);GO:0009506(plasmodesma)	ENOG4111RC1(NA)	NA	NA	NA	NA(NA)	-
A03	BjuA010159	8109929	8110884	585	G1/G3	hypothetical protein BRARA_C01435 [Brassica rapa]	SEC22	25.3 kDa vesicle transport protein OS=Arabidopsis thaliana GN=SEC22 PE=2 SV=1	GO:0005484(SNAP receptor activity);GO:0005634(nucleus);GO:0031201(SNARE complex)	COG5143(Vesicle-associated membrane protein)	K08517	vesicle transport protein SEC22	-	boe04130(SNARE interactions in vesicular transport);boe04145(Phagosome)	M4EK11.1 PF13774.4;Longin;
A03	BjuA010160	8111241	8112321	804	G1/G3	transcription factor LAF1-like [Brassica napus]	LAF1	Transcription factor LAF1 OS=Arabidopsis thaliana GN=LAF1 PE=1 SV=2	GO:0000981(RNA polymerase II transcription factor activity, sequence-specific DNA binding);GO:0001135(transcription factor activity, RNA polymerase II transcription factor recruiting);GO:0003677(DNA binding);GO:0003700(DNA binding transcription factor activity);GO:0005634(nucleus);GO:0006355(regulation of transcription, DNA-templated);GO:0006357(regulation of transcription by RNA polymerase II);G…	COG5147(Myblike DNAbinding domain containing protein)	NA	NA	NA	NA(NA)	A0A078H588.1 PF00249.29;Myb_DNA-binding;
A03	BjuA010161	8115806	8116834	1029	G1/G3	BnaA03g12700D [Brassica napus]	RUP1	WD repeat-containing protein RUP1 OS=Arabidopsis thaliana GN=RUP1 PE=1 SV=1	GO:0000166(nucleotide binding);GO:0005515(protein binding);GO:0005634(nucleus);GO:0005829(cytosol);GO:0005834(heterotrimeric G-protein complex);GO:0009507(chloroplast);GO:0009908(flower development);GO:0010114(response to red light);GO:0010218(response to far red light);GO:0010224(response to UV-B);GO:0043496(regulation of protein homodimerization activity);GO:0080008(Cul4-RING E3 ubiquitin ligas…	ENOG4111PED(regulation of protein homodimerization activity)	K10143	E3 ubiquitin-protein ligase RFWD2	EC:2.3.2.27	bna04120(Ubiquitin mediated proteolysis);bna04712(Circadian rhythm - plant)	A0A078HNF3.1 PF00400.30;WD40;
A03	BjuA010162	8118428	8119470	618	G1/G3	unnamed protein product, partial [Brassica oleracea]	ARFRP1	ADP-ribosylation factor-related protein 1 OS=Bos taurus GN=ARFRP1 PE=2 SV=1	GO:0005525(GTP binding);GO:0005622(intracellular);GO:0007264(small GTPase mediated signal transduction)	ENOG410ZMDV(ADP-ribosylation factor related protein 1)	NA	NA	NA	NA(NA)	R0GRR4.1 PF00025.19;Arf;
A03	BjuA010163	8120871	8121521	432	G1/G3	unnamed protein product, partial [Brassica rapa]	-	-	GO:0000164(protein phosphatase type 1 complex);GO:0004864(protein phosphatase inhibitor activity);GO:0043666(regulation of phosphoprotein phosphatase activity)	ENOG410YIQA(Protein phosphatase inhibitor 2 (IPP-2))	NA	NA	NA	NA(NA)	M4EK16.1 PF04979.12;IPP-2;
A03	BjuA010164	8122413	8123024	612	G1/G3	unnamed protein product [Brassica rapa]	APE_1940.1	Uncharacterized protein APE_1940.1 OS=Aeropyrum pernix (strain ATCC 700893 / DSM 11879 / JCM 9820 / NBRC 100138 / K1) GN=APE_1940.1 PE=3 SV=2	GO:0005975(carbohydrate metabolic process);GO:0016853(isomerase activity);GO:0030246(carbohydrate binding);GO:0097367(carbohydrate derivative binding);GO:1901135(carbohydrate derivative metabolic process)	COG0794(Arabinose 5-phosphate isomerase)	-	-	-	-	Q9LTK1.1 PF01380.20;SIS;
A03	BjuA010165	8123431	8123721	291	G1/G3	BnaA03g12750D [Brassica napus]	FIL1	Stamen-specific protein FIL1 OS=Antirrhinum majus GN=FIL1 PE=2 SV=1	GO:0005576(extracellular region);GO:0006508(proteolysis);GO:0006869(lipid transport);GO:0008233(peptidase activity);GO:0008289(lipid binding)	ENOG410Z2QH(Protease inhibitor seed storage lipid transfer protein)	-	-	-	-	A0A078HNE7.1 PF00234.20;Tryp_alpha_amyl;
A03	BjuA010166	8127358	8131713	864	G1/G3	hypothetical protein BRARA_C01442 [Brassica rapa]	PP2A14	F-box protein PP2-A14 OS=Arabidopsis thaliana GN=PP2A14 PE=1 SV=1	GO:0005515(protein binding);GO:0005634(nucleus);GO:0016567(protein ubiquitination);GO:0030246(carbohydrate binding)	ENOG410Y934(F-box protein)	-	-	-	-	M4EK20.1 PF14299.4;PP2;
A03	BjuA010167	8132522	8134668	828	G1/G3	protein COFACTOR ASSEMBLY OF COMPLEX C SUBUNIT B CCB2, chloroplastic isoform X1 [Brassica napus]	CCB2	Protein COFACTOR ASSEMBLY OF COMPLEX C SUBUNIT B CCB2, chloroplastic OS=Arabidopsis thaliana GN=CCB2 PE=1 SV=1	GO:0003674(molecular_function);GO:0009507(chloroplast);GO:0009535(chloroplast thylakoid membrane);GO:0010190(cytochrome b6f complex assembly);GO:0016021(integral component of membrane)	ENOG4111WI1(Protein of unknown function (DUF2930))	-	-	-	-	A0A078H464.1 PF11152.6;CCB2_CCB4;
A03	BjuA010168	8136104	8143214	1203	G1/G3	hypothetical protein BRARA_A01868 [Brassica rapa]	-	-	GO:0008150(biological_process)	ENOG410YWGR(NA)	NA	NA	NA	NA(NA)	A0A0D3AWQ1.1 PF05699.12;Dimer_Tnp_hAT;
A03	BjuA010169	8144095	8147965	858	G1/G3	PREDICTED: uncharacterized protein LOC103857146 isoform X1 [Brassica rapa]	-	-	GO:0005575(cellular_component);GO:0008150(biological_process)	ENOG410Y6CZ(Agenet domain)	-	-	-	-	M4EK24.1 PF05641.10;Agenet;
A03	BjuA010170	8156142	8157524	987	G1/G3	PREDICTED: BAG family molecular chaperone regulator 1 [Brassica rapa]	BAG1	BAG family molecular chaperone regulator 1 OS=Arabidopsis thaliana GN=BAG1 PE=1 SV=1	GO:0005515(protein binding);GO:0005634(nucleus);GO:0005739(mitochondrion);GO:0005829(cytosol);GO:0051087(chaperone binding);GO:0071629(cytoplasm protein quality control by the ubiquitin-proteasome system)	ENOG4111WNH(BCL-2-associated athanogene)	K09555	BCL2-associated athanogene 1	-	gmx04141(Protein processing in endoplasmic reticulum)	R0EWS8.1 PF02179.14;BAG;
A03	BjuA010171	8162211	8169528	588	G1/G3	PREDICTED: putative F-box/FBD/LRR-repeat protein At5g56810 [Brassica rapa]	At5g56810	Putative F-box/FBD/LRR-repeat protein At5g56810 OS=Arabidopsis thaliana GN=At5g56810 PE=3 SV=1	GO:0005634(nucleus);GO:0008150(biological_process)	ENOG411172Q(f-box family)	-	-	-	-	M4EK27.1 PF08387.8;FBD;
A03	BjuA010172	8170844	8172364	1521	G1/G3	BnaA03g12860D [Brassica napus]	DTX50	Protein DETOXIFICATION 50 OS=Arabidopsis thaliana GN=DTX50 PE=2 SV=1	GO:0005770(late endosome);GO:0005886(plasma membrane);GO:0006855(drug transmembrane transport);GO:0009737(response to abscisic acid);GO:0010015(root morphogenesis);GO:0015297(antiporter activity);GO:0016021(integral component of membrane);GO:0031902(late endosome membrane);GO:0080168(abscisic acid transport);GO:0090440(abscisic acid transmembrane transporter activity);GO:2000070(regulation of res…	COG0534(Mate efflux family protein)	NA	NA	NA	NA(NA)	M4EK28.1 PF01554.16;MatE;
A03	BjuA010173	8191808	8193755	1083	G1/G3	BnaA03g12870D [Brassica napus]	RS41	Serine/arginine-rich splicing factor RS41 OS=Arabidopsis thaliana GN=RS41 PE=1 SV=2	GO:0000398(mRNA splicing, via spliceosome);GO:0003723(RNA binding);GO:0003729(mRNA binding);GO:0005515(protein binding);GO:0005634(nucleus);GO:0005681(spliceosomal complex);GO:0008380(RNA splicing);GO:0010445(nuclear dicing body);GO:0016607(nuclear speck);GO:0031053(primary miRNA processing)	COG0724(Rna-binding protein)	K12893	splicing factor, arginine/serine-rich 4/5/6	-	bna03040(Spliceosome)	A0A0D3A6B5.1 PF00076.20;RRM_1;
A03	BjuA010174	8200792	8201379	588	G1/G3	PREDICTED: ethylene-responsive transcription factor ERF025-like [Brassica oleracea var. oleracea]	ERF025	Ethylene-responsive transcription factor ERF025 OS=Arabidopsis thaliana GN=ERF025 PE=2 SV=1	GO:0003677(DNA binding);GO:0003700(DNA binding transcription factor activity);GO:0005634(nucleus);GO:0006351(transcription, DNA-templated);GO:0006355(regulation of transcription, DNA-templated);GO:0009873(ethylene-activated signaling pathway);GO:0019760(glucosinolate metabolic process);GO:0043565(sequence-specific DNA binding);GO:0044212(transcription regulatory region DNA binding);GO:0045893(pos…	ENOG410YMJJ(Transcription factor)	NA	NA	NA	NA(NA)	Q9FJ90.1 PF00847.18;AP2;
A03	BjuA010175	8203044	8204207	1164	G1/G3	hypothetical protein BRARA_C01454 [Brassica rapa]	-	-	GO:0003676(nucleic acid binding);GO:0003700(DNA binding transcription factor activity);GO:0006355(regulation of transcription, DNA-templated);GO:0008270(zinc ion binding);GO:0009507(chloroplast)	ENOG4111FT7(ZnF_C2H2)	-	-	-	-	A0A022QG44.1 PF01936.16;NYN;
A03	BjuA010176	8205312	8207317	1314	G1/G3	BnaA03g12910D [Brassica napus]	ZFWD2	Zinc finger CCCH domain-containing protein 63 OS=Arabidopsis thaliana GN=ZFWD2 PE=2 SV=1	GO:0003676(nucleic acid binding);GO:0003677(DNA binding);GO:0003729(mRNA binding);GO:0005575(cellular_component);GO:0008150(biological_process);GO:0046872(metal ion binding)	ENOG411058N(zinc finger CCCH domain-containing protein)	K10260	F-box and WD-40 domain protein 7	-	egr04120(Ubiquitin mediated proteolysis)	A0A078HGG2.1 PF11715.6;Nup160;
A03	BjuA010177	8207620	8214894	1896	G1/G3	hypothetical protein BRARA_C01457 [Brassica rapa]	HTH	Protein HOTHEAD OS=Arabidopsis thaliana GN=HTH PE=1 SV=1	GO:0016614(oxidoreductase activity, acting on CH-OH group of donors);GO:0016832(aldehyde-lyase activity);GO:0050660(flavin adenine dinucleotide binding);GO:0055114(oxidation-reduction process)	COG2303(oxidoreductase)	K00108	choline dehydrogenase	EC:1.1.99.1	brp00260(Glycine, serine and threonine metabolism)	M4EK35.1 PF00732.17;GMC_oxred_N;
A03	BjuA010605	12704404	12706220	714	G1/G3	PREDICTED: LOB domain-containing protein 16-like [Brassica rapa]	LBD16	LOB domain-containing protein 16 OS=Arabidopsis thaliana GN=LBD16 PE=1 SV=1	GO:0005634(nucleus);GO:0009888(tissue development);GO:0010311(lateral root formation);GO:0045893(positive regulation of transcription, DNA-templated)	ENOG410YA3N(lob domain-containing protein)	NA	NA	NA	NA(NA)	A0A078JRJ3.1 PF03195.12;DUF260;
A03	BjuA010606	12715700	12717023	855	G1/G3	unnamed protein product [Brassica rapa]	At2g42460	MATH domain and coiled-coil domain-containing protein At2g42460 OS=Arabidopsis thaliana GN=At2g42460 PE=2 SV=1	GO:0003674(molecular_function);GO:0005737(cytoplasm);GO:0008150(biological_process)	ENOG410XQV8(meprin and TRAF homology domain-containing protein MATH domain-containing protein)	NA	NA	NA	NA(NA)	A0A078GB50.1 PF00917.24;MATH;
A03	BjuA010607	12731967	12735320	2274	G1/G3	uncharacterized protein LOC106428169 [Brassica napus]	maoI	Primary amine oxidase OS=Arthrobacter sp. (strain P1) GN=maoI PE=1 SV=1	GO:0005507(copper ion binding);GO:0005777(peroxisome);GO:0008131(primary amine oxidase activity);GO:0009507(chloroplast);GO:0010311(lateral root formation);GO:0048038(quinone binding);GO:0055114(oxidation-reduction process)	COG3733(amine oxidase)	K00276	primary-amine oxidase	EC:1.4.3.21	bna00260(Glycine, serine and threonine metabolism);bna00350(Tyrosine metabolism);bna00360(Phenylalanine metabolism);bna00410(beta-Alanine metabolism);bna00950(Isoquinoline alkaloid biosynthesis);bna00960(Tropane, piperidine and pyridine alkaloid biosynthesis)	I1KXB5.1 PF01179.18;Cu_amine_oxid;
A03	BjuA010608	12743660	12744931	1272	G1/G3	unnamed protein product [Brassica rapa]	SD16	Receptor-like serine/threonine-protein kinase SD1-6 OS=Arabidopsis thaliana GN=SD16 PE=1 SV=2	GO:0004672(protein kinase activity);GO:0004674(protein serine/threonine kinase activity);GO:0004675(transmembrane receptor protein serine/threonine kinase activity);GO:0005524(ATP binding);GO:0005829(cytosol);GO:0005886(plasma membrane);GO:0006468(protein phosphorylation);GO:0007178(transmembrane receptor protein serine/threonine kinase signaling pathway);GO:0016021(integral component of membrane…	COG0515(Serine Threonine protein kinase)	NA	NA	NA	NA(NA)	A0A0D3B6D1.1 PF00954.18;S_locus_glycop;
A03	BjuA010609	12751861	12752537	426	G1/G3	PREDICTED: protein COLD-REGULATED 15B, chloroplastic-like [Brassica rapa]	COR15A	Protein COLD-REGULATED 15A, chloroplastic OS=Arabidopsis thaliana GN=COR15A PE=1 SV=1	GO:0005534(galactose binding);GO:0006970(response to osmotic stress);GO:0007623(circadian rhythm);GO:0008289(lipid binding);GO:0009409(response to cold);GO:0009414(response to water deprivation);GO:0009416(response to light stimulus);GO:0009507(chloroplast);GO:0009570(chloroplast stroma);GO:0009631(cold acclimation);GO:0009644(response to high light intensity);GO:0009651(response to salt stress);…	ENOG411043J(NA)	-	-	-	-	-
A03	BjuA010610	12755653	12756761	387	G1/G3	PREDICTED: protein COLD-REGULATED 15B, chloroplastic-like [Brassica oleracea var. oleracea]	COR15A	Protein COLD-REGULATED 15A, chloroplastic OS=Arabidopsis thaliana GN=COR15A PE=1 SV=1	GO:0005534(galactose binding);GO:0006970(response to osmotic stress);GO:0007623(circadian rhythm);GO:0008289(lipid binding);GO:0009409(response to cold);GO:0009414(response to water deprivation);GO:0009416(response to light stimulus);GO:0009507(chloroplast);GO:0009570(chloroplast stroma);GO:0009631(cold acclimation);GO:0009644(response to high light intensity);GO:0009651(response to salt stress);…	-	K08917	light-harvesting complex II chlorophyll a/b binding protein 6	-	csat00196(Photosynthesis - antenna proteins)	-
A03	BjuA010611	12759231	12759761	531	G1/G3	BnaA03g56730D [Brassica napus]	-	-	-	-	-	-	-	-	-
A03	BjuA010612	12766530	12769007	2016	G1/G3	PREDICTED: inactive TPR repeat-containing thioredoxin TTL3 [Brassica rapa]	TTL3	Inactive TPR repeat-containing thioredoxin TTL3 OS=Arabidopsis thaliana GN=TTL3 PE=1 SV=2	GO:0005515(protein binding);GO:0005634(nucleus);GO:0006970(response to osmotic stress);GO:0009734(auxin-activated signaling pathway);GO:0009742(brassinosteroid mediated signaling pathway);GO:0010305(leaf vascular tissue pattern formation);GO:0045454(cell redox homeostasis)	COG0457(repeat-containing protein)	NA	NA	NA	NA(NA)	A0A078IYB9.1 PF00085.18;Thioredoxin;
A03	BjuA010613	12778601	12780249	789	G1/G3	hypothetical protein BRARA_C02164 [Brassica rapa]	GRF9	14-3-3-like protein GF14 mu OS=Arabidopsis thaliana GN=GRF9 PE=1 SV=2	GO:0005509(calcium ion binding);GO:0005515(protein binding);GO:0005634(nucleus);GO:0005737(cytoplasm);GO:0005829(cytosol);GO:0005886(plasma membrane);GO:0009570(chloroplast stroma);GO:0019904(protein domain specific binding);GO:0045309(protein phosphorylated amino acid binding);GO:0048528(post-embryonic root development)	COG5040(Tyrosine 3-monooxygenase tryptophan 5-monooxygenase activation protein)	NA	NA	NA	NA(NA)	V4LQV4.1 PF00244.18;14-3-3;
A03	BjuA010614	12796392	12797741	765	G1/G3	PREDICTED: protein PHOSPHATE STARVATION RESPONSE 1 [Brassica rapa]	At1g14600	Putative Myb family transcription factor At1g14600 OS=Arabidopsis thaliana GN=At1g14600 PE=2 SV=2	GO:0003677(DNA binding);GO:0003700(DNA binding transcription factor activity);GO:0005515(protein binding);GO:0005634(nucleus);GO:0006351(transcription, DNA-templated);GO:0006355(regulation of transcription, DNA-templated)	ENOG41105H9(MYB family transcription factor)	K06236	collagen, type I, alpha	-	cvr04933(AGE-RAGE signaling pathway in diabetic complications)	A0A0D3B6E2.1 PF00249.29;Myb_DNA-binding;
A03	BjuA010615	12803569	12805409	597	G1/G3	PREDICTED: multiprotein-bridging factor 1a [Brassica rapa]	MBF1A	Multiprotein-bridging factor 1a OS=Arabidopsis thaliana GN=MBF1A PE=2 SV=1	GO:0003677(DNA binding);GO:0003713(transcription coactivator activity);GO:0003729(mRNA binding);GO:0005634(nucleus);GO:0005730(nucleolus);GO:0006351(transcription, DNA-templated);GO:0009723(response to ethylene);GO:0043565(sequence-specific DNA binding);GO:0045893(positive regulation of transcription, DNA-templated)	COG1813(Factor 1)	NA	NA	NA	NA(NA)	D7LW64.1 PF08523.8;MBF1;
A03	BjuA010616	12814674	12815786	480	G1/G3	hypothetical protein BRARA_C02167 [Brassica rapa]	PCO4	Plant cysteine oxidase 4 OS=Arabidopsis thaliana GN=PCO4 PE=1 SV=2	GO:0005634(nucleus);GO:0005737(cytoplasm);GO:0016702(oxidoreductase activity, acting on single donors with incorporation of molecular oxygen, incorporation of two atoms of oxygen);GO:0017172(cysteine dioxygenase activity);GO:0046872(metal ion binding);GO:0055114(oxidation-reduction process)	ENOG4111Y3H(2-aminoethanethiol)	K10712	cysteamine dioxygenase	EC:1.13.11.19	csat00430(Taurine and hypotaurine metabolism)	M4C7U3.1 PF07847.10;PCO_ADO;
A03	BjuA010617	12816864	12823489	1785	G1/G3	PREDICTED: uncharacterized protein LOC103858028 [Brassica rapa]	MBF1A	Multiprotein-bridging factor 1a OS=Arabidopsis thaliana GN=MBF1A PE=2 SV=1	GO:0003746(translation elongation factor activity);GO:0005634(nucleus);GO:0006357(regulation of transcription by RNA polymerase II);GO:0006368(transcription elongation from RNA polymerase II promoter);GO:0006414(translational elongation);GO:0070449(elongin complex)	ENOG4110PG3(transcription elongation factor b)	NA	NA	NA	NA(NA)	A0A078HZP9.1 PF06881.9;Elongin_A;
A03	BjuA011872	19380822	19383404	1872	G1/G2	asparagine--tRNA ligase, cytoplasmic 2-like [Brassica napus]	SYNC2	Asparagine--tRNA ligase, cytoplasmic 2 OS=Arabidopsis thaliana GN=SYNC2 PE=1 SV=2	GO:0004812(aminoacyl-tRNA ligase activity);GO:0004816(asparagine-tRNA ligase activity);GO:0005524(ATP binding);GO:0005737(cytoplasm);GO:0005739(mitochondrion);GO:0005829(cytosol);GO:0006418(tRNA aminoacylation for protein translation);GO:0006421(asparaginyl-tRNA aminoacylation);GO:0009507(chloroplast)	COG0017(asparaginyl-tRNA synthetase)	K01893	asparaginyl-tRNA synthetase	EC:6.1.1.22	bna00970(Aminoacyl-tRNA biosynthesis)	A0A078CB47.1 PF00152.18;tRNA-synt_2;
A03	BjuA011873	19385878	19386835	300	G1/G2	protein LIM1-like [Brassica napus]	-	-	GO:0005739(mitochondrion);GO:0006869(lipid transport);GO:0008289(lipid binding)	ENOG4111CDV(Protease inhibitor seed storage lipid transfer protein)	-	-	-	-	M4CAM3.1 PF14368.4;LTP_2;
A03	BjuA011874	19388750	19389028	279	G1/G2	unnamed protein product [Brassica rapa]	-	-	GO:0005576(extracellular region);GO:0005773(vacuole);GO:0008150(biological_process)	ENOG410YPP5(Protein of unknown function, DUF538)	-	-	-	-	A0A078CCZ1.1 PF04398.10;DUF538;
A03	BjuA011875	19393114	19393572	459	G1/G2	PREDICTED: calmodulin-like protein 3 [Brassica rapa]	CML3	Calmodulin-like protein 3 OS=Arabidopsis thaliana GN=CML3 PE=2 SV=1	GO:0005509(calcium ion binding);GO:0005777(peroxisome);GO:0005886(plasma membrane)	COG5126(Calcium-binding protein)	K13448	calcium-binding protein CML	-	brp04626(Plant-pathogen interaction)	M4CAM5.1 PF13499.4;EF-hand_7;
A03	BjuA011876	19394777	19395346	570	G1/G2	unnamed protein product, partial [Brassica rapa]	-	-	GO:0003674(molecular_function);GO:0008150(biological_process);GO:0009507(chloroplast)	ENOG4111VJP(NA)	-	-	-	-	-
A03	BjuA011877	19402095	19409485	2907	G1/G2	formin-like protein 10 [Brassica napus]	FH10	Formin-like protein 10 OS=Arabidopsis thaliana GN=FH10 PE=2 SV=1	GO:0003779(actin binding);GO:0005886(plasma membrane);GO:0016021(integral component of membrane)	ENOG410XQR0(inverted formin, FH2 and WH2 domain containing)	K13344	peroxin-13	-	brp04146(Peroxisome)	A0A078CAF4.1 PF02181.21;FH2;
A03	BjuA011878	19409919	19411606	765	G1/G2	PREDICTED: uncharacterized protein LOC103859231 [Brassica rapa]	-	-	GO:0005634(nucleus);GO:0008150(biological_process)	ENOG4111MBV(expressed protein)	K15744	zeta-carotene isomerase	EC:5.2.1.12	bna00906(Carotenoid biosynthesis)	A0A067EJB9.1 PF00249.29;Myb_DNA-binding;
A03	BjuA011879	19412593	19414421	726	G1/G2	PREDICTED: cytochrome b561 and DOMON domain-containing protein At3g07570-like [Brassica rapa]	At3g07570	Cytochrome b561 and DOMON domain-containing protein At3g07570 OS=Arabidopsis thaliana GN=At3g07570 PE=2 SV=1	GO:0016020(membrane)	ENOG410XR70(Ferric-chelate reductase)	-	-	-	-	V4LZH9.1 PF03351.15;DOMON;
A03	BjuA011880	19415567	19416476	504	G1/G2	unnamed protein product [Brassica rapa]	SmD1	Probable small nuclear ribonucleoprotein Sm D1 OS=Drosophila melanogaster GN=SmD1 PE=1 SV=1	GO:0000243(commitment complex);GO:0000245(spliceosomal complex assembly);GO:0000387(spliceosomal snRNP assembly);GO:0003723(RNA binding);GO:0005634(nucleus);GO:0005682(U5 snRNP);GO:0005685(U1 snRNP);GO:0005686(U2 snRNP);GO:0005687(U4 snRNP);GO:0005689(U12-type spliceosomal complex);GO:0005730(nucleolus);GO:0005732(small nucleolar ribonucleoprotein complex);GO:0005774(vacuolar membrane);GO:0005829…	COG1958(small nuclear ribonucleoprotein)	K11087	small nuclear ribonucleoprotein D1	-	brp03040(Spliceosome)	M4CAN1.1 PF01423.20;LSM;
A03	BjuA011881	19416767	19417346	396	G1/G2	PREDICTED: uncharacterized protein LOC103859232 isoform X2 [Brassica rapa]	HIPP16	Heavy metal-associated isoprenylated plant protein 16 OS=Arabidopsis thaliana GN=HIPP16 PE=2 SV=1	GO:0005634(nucleus);GO:0046872(metal ion binding)	ENOG410ZCT8(NA)	NA	NA	NA	NA(NA)	M5WX62.1 PF00403.24;HMA;
A03	BjuA011882	19418995	19421499	1128	G1/G2	unnamed protein product [Brassica rapa]	ADT2	Arogenate dehydratase/prephenate dehydratase 2, chloroplastic OS=Arabidopsis thaliana GN=ADT2 PE=1 SV=1	GO:0004664(prephenate dehydratase activity);GO:0009094(L-phenylalanine biosynthetic process);GO:0009507(chloroplast);GO:0009570(chloroplast stroma);GO:0047769(arogenate dehydratase activity)	COG0077(Prephenate dehydratase)	K05359	arogenate/prephenate dehydratase	EC:4.2.1.91 4.2.1.51	brp00400(Phenylalanine, tyrosine and tryptophan biosynthesis)	A0A078F4L7.1 PF00800.16;PDT;
A03	BjuA011883	19422086	19423906	723	G1/G2	hypothetical protein BRARA_C03222 [Brassica rapa]	-	-	GO:0003674(molecular_function);GO:0005634(nucleus);GO:0008150(biological_process)	ENOG410YQBE(NA)	-	-	-	-	-
A03	BjuA011884	19427515	19428968	1053	G1/G2	hypothetical protein BRARA_C03223 [Brassica rapa]	COL9	Zinc finger protein CONSTANS-LIKE 9 OS=Arabidopsis thaliana GN=COL9 PE=2 SV=1	GO:0003700(DNA binding transcription factor activity);GO:0005515(protein binding);GO:0005634(nucleus);GO:0006355(regulation of transcription, DNA-templated);GO:0007623(circadian rhythm);GO:0008270(zinc ion binding);GO:0048579(negative regulation of long-day photoperiodism, flowering)	ENOG410YA5C(Zinc finger protein CONSTANS-LIKE)	K12135	zinc finger protein CONSTANS	-	brp04712(Circadian rhythm - plant)	A0A0D2PVD3.1 PF00643.22;zf-B_box;
A03	BjuA011885	19430175	19431037	624	G1/G2	transmembrane emp24 domain-containing protein p24beta2 [Brassica napus]	At3g07680	Transmembrane emp24 domain-containing protein p24beta2 OS=Arabidopsis thaliana GN=At3g07680 PE=1 SV=1	GO:0005783(endoplasmic reticulum);GO:0005789(endoplasmic reticulum membrane);GO:0005794(Golgi apparatus);GO:0006886(intracellular protein transport);GO:0007030(Golgi organization);GO:0008320(protein transmembrane transporter activity);GO:0015031(protein transport);GO:0016020(membrane);GO:0016021(integral component of membrane);GO:0016192(vesicle-mediated transport);GO:0030134(COPII-coated ER to G…	ENOG410XQCK(transmembrane emp24 domain trafficking protein 2)	NA	NA	NA	NA(NA)	A0A078CGF9.1 PF01105.22;EMP24_GP25L;
A03	BjuA011886	19431905	19432969	375	G1/G2	uncharacterized protein LOC106388997 [Brassica napus]	-	-	GO:0003674(molecular_function);GO:0005737(cytoplasm);GO:0008150(biological_process)	ENOG410XQCK(transmembrane emp24 domain trafficking protein 2)	-	-	-	-	R0HPM1.1 PF07647.15;SAM_2;
A03	BjuA011887	19433540	19434530	741	G1/G2	thymidine kinase a-like [Brassica napus]	TK1A	Thymidine kinase a OS=Arabidopsis thaliana GN=TK1A PE=1 SV=1	GO:0004797(thymidine kinase activity);GO:0005524(ATP binding);GO:0005737(cytoplasm);GO:0006302(double-strand break repair);GO:0010225(response to UV-C);GO:0016310(phosphorylation);GO:0042802(identical protein binding);GO:0046104(thymidine metabolic process);GO:0046872(metal ion binding);GO:0071897(DNA biosynthetic process)	COG1435(THymidine Kinase)	K00857	thymidine kinase	EC:2.7.1.21	bna00240(Pyrimidine metabolism)	A0A078F3L9.1 PF00265.16;TK;
A03	BjuA011888	19436000	19437511	1269	G1/G2	PREDICTED: heterogeneous nuclear ribonucleoprotein 1-like [Brassica rapa]	RNP1	Heterogeneous nuclear ribonucleoprotein 1 OS=Arabidopsis thaliana GN=RNP1 PE=1 SV=1	GO:0003723(RNA binding);GO:0003729(mRNA binding);GO:0005576(extracellular region)	ENOG410YA8Z(Rna-binding protein)	K14411	RNA-binding protein Musashi	-	brp03015(mRNA surveillance pathway)	M4FG07.1 PF00076.20;RRM_1;
A03	BjuA011889	19451651	19452422	513	G1/G2	U11/U12 small nuclear ribonucleoprotein 25 kDa protein [Brassica napus]	SNRNP25	U11/U12 small nuclear ribonucleoprotein 25 kDa protein OS=Arabidopsis thaliana GN=SNRNP25 PE=2 SV=1	GO:0003674(molecular_function);GO:0005634(nucleus);GO:0005681(spliceosomal complex);GO:0006397(mRNA processing);GO:0008380(RNA splicing)	ENOG4111HGM(u11 U12 small nuclear ribonucleoprotein 25 kDa)	NA	NA	NA	NA(NA)	M0SE72.1 PF00240.21;ubiquitin;
A03	BjuA011890	19456209	19457438	1230	G1/G2	F-box protein At3g07870-like [Brassica napus]	At3g07870	F-box protein At3g07870 OS=Arabidopsis thaliana GN=At3g07870 PE=2 SV=1	GO:0003674(molecular_function);GO:0005634(nucleus);GO:0008284(positive regulation of cell proliferation);GO:0009506(plasmodesma)	ENOG410YVBU(F-box protein)	NA	NA	NA	NA(NA)	Q9SFC7.1 PF08268.10;FBA_3;
A03	BjuA011891	19459594	19460739	708	G1/G2	rho GDP-dissociation inhibitor 1-like [Brassica napus]	GDI1	Rho GDP-dissociation inhibitor 1 OS=Arabidopsis thaliana GN=GDI1 PE=1 SV=1	GO:0005094(Rho GDP-dissociation inhibitor activity);GO:0005096(GTPase activator activity);GO:0005515(protein binding);GO:0005737(cytoplasm);GO:0009932(cell tip growth);GO:0010053(root epidermal cell differentiation)	ENOG4111K44(Rho GDP dissociation inhibitor (GDI))	NA	NA	NA	NA(NA)	M4CAP5.1 PF02115.15;Rho_GDI;
A03	BjuA011892	19466695	19467358	216	G1/G2	PREDICTED: reactive oxygen species modulator 1-like [Brassica rapa]	-	-	GO:0003674(molecular_function);GO:0008150(biological_process);GO:0016021(integral component of membrane)	ENOG411279J(Reactive oxygen species modulator 1)	-	-	-	-	M4CAP7.1 PF10247.7;Romo1;
A03	BjuA011893	19470058	19472183	1152	G1/G2	PREDICTED: probable ADP-ribosylation factor GTPase-activating protein AGD11 [Brassica rapa]	AGD11	Probable ADP-ribosylation factor GTPase-activating protein AGD11 OS=Arabidopsis thaliana GN=AGD11 PE=2 SV=1	GO:0005096(GTPase activator activity);GO:0005634(nucleus);GO:0031267(small GTPase binding);GO:0046872(metal ion binding)	COG5347(domain, ankyrin repeat and PH domain)	K12486	stromal membrane-associated protein	-	brp04144(Endocytosis)	V4M2X3.1 PF01412.16;ArfGap;
A03	BjuA011894	19473248	19476338	1839	G1/G2	phosphatidylinositol 4-phosphate 5-kinase 6-like [Brassica napus]	PIP5K6	Phosphatidylinositol 4-phosphate 5-kinase 6 OS=Arabidopsis thaliana GN=PIP5K6 PE=2 SV=1	GO:0005524(ATP binding);GO:0005634(nucleus);GO:0016308(1-phosphatidylinositol-4-phosphate 5-kinase activity);GO:0016324(apical plasma membrane);GO:0072583(clathrin-dependent endocytosis);GO:0090406(pollen tube)	COG4642(whole genome shotgun sequence);COG5253(phosphatidylinositol-4-phosphate 5-kinase)	K00889	1-phosphatidylinositol-4-phosphate 5-kinase	EC:2.7.1.68	bna00562(Inositol phosphate metabolism);bna04070(Phosphatidylinositol signaling system);bna04144(Endocytosis)	A0A078F4K3.1 PF01504.16;PIP5K;
A03	BjuA011895	19486737	19489048	1077	G1/G2	polygalacturonase QRT2 [Brassica napus]	QRT2	Polygalacturonase QRT2 OS=Arabidopsis thaliana GN=QRT2 PE=1 SV=2	GO:0004650(polygalacturonase activity);GO:0005576(extracellular region);GO:0005618(cell wall);GO:0005975(carbohydrate metabolic process);GO:0009830(cell wall modification involved in abscission);GO:0009901(anther dehiscence);GO:0010047(fruit dehiscence);GO:0045490(pectin catabolic process);GO:0048235(pollen sperm cell differentiation)	COG5434(Glycoside hydrolase family 28)	K01184	polygalacturonase	EC:3.2.1.15	rcu00040(Pentose and glucuronate interconversions)	A0A0D3BA94.1 PF00295.15;Glyco_hydro_28;
A03	BjuA011896	19489442	19496397	3867	G1/G2	hypothetical protein BRARA_C03238 [Brassica rapa]	M3KE1	MAP3K epsilon protein kinase 1 OS=Brassica napus GN=M3KE1 PE=1 SV=1	GO:0004674(protein serine/threonine kinase activity);GO:0005730(nucleolus);GO:0046777(protein autophosphorylation);GO:0051302(regulation of cell division)	ENOG410XQGS(mitogen-activated protein kinase kinase kinase)	K20606	mitogen-activated protein kinase kinase kinase ANP1	EC:2.7.11.25	cann04016(MAPK signaling pathway - plant)	M5XKP3.1 PF00069.23;Pkinase;
A03	BjuA011897	19496922	19498797	1125	G1/G2	protein TAB2 homolog, chloroplastic [Brassica napus]	-	-	GO:0003723(RNA binding);GO:0006412(translation);GO:0009507(chloroplast);GO:0009658(chloroplast organization);GO:0009704(de-etiolation);GO:0048564(photosystem I assembly)	ENOG410YDC7(Protein of unknown function (DUF1092))	-	-	-	-	A0A078F0J2.1 PF06485.9;DUF1092;
A03	BjuA011898	19499183	19503626	1596	G1/G2	PREDICTED: protein DETOXIFICATION 43-like [Brassica rapa]	DTX43	Protein DETOXIFICATION 43 OS=Arabidopsis thaliana GN=DTX43 PE=1 SV=1	GO:0005215(transporter activity);GO:0005886(plasma membrane);GO:0006855(drug transmembrane transport);GO:0006879(cellular iron ion homeostasis);GO:0009737(response to abscisic acid);GO:0015137(citrate transmembrane transporter activity);GO:0015297(antiporter activity);GO:0016020(membrane);GO:0016021(integral component of membrane);GO:0016036(cellular response to phosphate starvation);GO:0030001(m…	COG0534(Mate efflux family protein)	NA	NA	NA	NA(NA)	A0A078CB70.1 PF01554.16;MatE;
A03	BjuA011899	19514858	19519867	1590	G1/G2	unnamed protein product [Brassica rapa]	DTX43	Protein DETOXIFICATION 43 OS=Arabidopsis thaliana GN=DTX43 PE=1 SV=1	GO:0005215(transporter activity);GO:0005886(plasma membrane);GO:0006855(drug transmembrane transport);GO:0006879(cellular iron ion homeostasis);GO:0009737(response to abscisic acid);GO:0015137(citrate transmembrane transporter activity);GO:0015297(antiporter activity);GO:0016020(membrane);GO:0016021(integral component of membrane);GO:0016036(cellular response to phosphate starvation);GO:0030001(m…	COG0534(Mate efflux family protein)	NA	NA	NA	NA(NA)	A0A078CB70.1 PF01554.16;MatE;
A04	BjuA000133	21833220	21834719	426	G1/G3	hypothetical protein BRARA_K01534 [Brassica rapa]	-	-	-	-	-	-	-	-	-
A04	BjuA015199	5094163	5094453	291	G1/G3	uncharacterized protein LOC106407144 [Brassica napus]	-	-	-	-	-	-	-	-	-
A04	BjuA015200	5095022	5095736	201	G1/G3	BnaAnng30530D [Brassica napus]	-	-	-	-	-	-	-	-	-
A04	BjuA015201	5113051	5114265	1215	G1/G3	hypothetical protein BRARA_D00589 [Brassica rapa]	PUB22	E3 ubiquitin-protein ligase PUB22 OS=Arabidopsis thaliana GN=PUB22 PE=1 SV=1	GO:0002679(respiratory burst involved in defense response);GO:0004842(ubiquitin-protein transferase activity);GO:0005515(protein binding);GO:0005737(cytoplasm);GO:0005829(cytosol);GO:0006952(defense response);GO:0009414(response to water deprivation);GO:0010200(response to chitin);GO:0016567(protein ubiquitination);GO:0051865(protein autoubiquitination)	ENOG410YC1Z(e3 ubiquitin-protein ligase)	-	-	-	-	A0A078E2F8.1 PF04078.11;Rcd1;
A04	BjuA015202	5124994	5129261	1629	G1/G3	PREDICTED: lipase-like PAD4 isoform X1 [Brassica rapa]	PAD4	Lipase-like PAD4 OS=Arabidopsis thaliana GN=PAD4 PE=1 SV=1	GO:0001666(response to hypoxia);GO:0002213(defense response to insect);GO:0004806(triglyceride lipase activity);GO:0005515(protein binding);GO:0005634(nucleus);GO:0005737(cytoplasm);GO:0006629(lipid metabolic process);GO:0009617(response to bacterium);GO:0009625(response to insect);GO:0009626(plant-type hypersensitive response);GO:0009627(systemic acquired resistance);GO:0009751(response to salic…	ENOG410Y7YA(Class 3 lipase)	K18875	enhanced disease susceptibility 1 protein	-	egu04626(Plant-pathogen interaction)	M4CRT0.1 PF01764.23;Lipase_3;
A04	BjuA015203	5142760	5142939	180	G1/G3	unnamed protein product [Brassica rapa]	-	-	-	ENOG4111PN6(NA)	-	-	-	-	-
A04	BjuA015204	5145628	5146960	1029	G1/G3	PREDICTED: syntaxin-122 [Brassica rapa]	SYP122	Syntaxin-122 OS=Arabidopsis thaliana GN=SYP122 PE=1 SV=1	GO:0000149(SNARE binding);GO:0005484(SNAP receptor activity);GO:0005886(plasma membrane);GO:0006612(protein targeting to membrane);GO:0006886(intracellular protein transport);GO:0006887(exocytosis);GO:0006906(vesicle fusion);GO:0009506(plasmodesma);GO:0009863(salicylic acid mediated signaling pathway);GO:0009867(jasmonic acid mediated signaling pathway);GO:0010363(regulation of plant-type hyperse…	COG5074(SYNtaxin)	K08486	syntaxin 1B/2/3	-	brp04130(SNARE interactions in vesicular transport)	A0A0D3BYI7.1 PF00804.23;Syntaxin;
A04	BjuA015205	5148183	5149836	978	G1/G3	BnaA04g05480D [Brassica napus]	tatdn1	Putative deoxyribonuclease TATDN1 OS=Xenopus laevis GN=tatdn1 PE=2 SV=1	GO:0004536(deoxyribonuclease activity);GO:0005634(nucleus)	COG0084(tatd family)	NA	NA	NA	NA(NA)	D7LU59.1 PF01026.19;TatD_DNase;
A04	BjuA015206	5150029	5151169	924	G1/G3	RNA-binding protein CP33, chloroplastic [Brassica napus]	CP33	RNA-binding protein CP33, chloroplastic OS=Arabidopsis thaliana GN=CP33 PE=2 SV=1	GO:0003723(RNA binding);GO:0003729(mRNA binding);GO:0006397(mRNA processing);GO:0009507(chloroplast);GO:0009570(chloroplast stroma);GO:0009579(thylakoid);GO:0031425(chloroplast RNA processing);GO:1901259(chloroplast rRNA processing)	COG0724(Rna-binding protein)	NA	NA	NA	NA(NA)	A0A078E464.1 PF00076.20;RRM_1;
A04	BjuA015207	5153233	5155316	1320	G1/G3	unnamed protein product [Brassica rapa]	FLA15	Fasciclin-like arabinogalactan protein 15 OS=Arabidopsis thaliana GN=FLA15 PE=2 SV=1	GO:0005576(extracellular region);GO:0007155(cell adhesion)	COG2335(Beta-Ig-H3 fasciclin)	-	-	-	-	A0A0J8BV42.1 PF02469.20;Fasciclin;
A04	BjuA015208	5168968	5169314	264	G1/G3	PREDICTED: uncharacterized protein LOC103863470 [Brassica rapa]	-	-	GO:0003674(molecular_function);GO:0016021(integral component of membrane);GO:0080167(response to karrikin)	ENOG410ZHIT(NA)	-	-	-	-	-
A04	BjuA015209	5177095	5178868	1299	G1/G3	unnamed protein product [Brassica rapa]	SPP3B	Probable sucrose-phosphatase 3b OS=Arabidopsis thaliana GN=SPP3B PE=2 SV=1	GO:0000287(magnesium ion binding);GO:0005829(cytosol);GO:0005986(sucrose biosynthetic process);GO:0016757(transferase activity, transferring glycosyl groups);GO:0050307(sucrose-phosphate phosphatase activity)	COG0561(,hydrolase)	K07024	sucrose-6-phosphatase	EC:3.1.3.24	bna00500(Starch and sucrose metabolism)	A0A078GCU0.1 PF05116.11;S6PP;
A04	BjuA015210	5183554	5187185	2148	G1/G3	PREDICTED: ABC transporter G family member 27 isoform X1 [Brassica rapa]	ABCG27	ABC transporter G family member 27 OS=Arabidopsis thaliana GN=ABCG27 PE=2 SV=1	GO:0005886(plasma membrane);GO:0016021(integral component of membrane);GO:0042626(ATPase activity, coupled to transmembrane movement of substances)	COG0561(,hydrolase)	K05681	ATP-binding cassette, subfamily G (WHITE), member 2	-	cic02010(ABC transporters)	A0A078G9V2.1 PF01061.22;ABC2_membrane;
A04	BjuA015211	5188080	5189353	504	G1/G3	PREDICTED: ATP synthase subunit d, mitochondrial-like [Brassica rapa]	At3g52300	ATP synthase subunit d, mitochondrial OS=Arabidopsis thaliana GN=At3g52300 PE=1 SV=3	GO:0000274(mitochondrial proton-transporting ATP synthase, stator stalk);GO:0000276(mitochondrial proton-transporting ATP synthase complex, coupling factor F(o));GO:0005507(copper ion binding);GO:0005730(nucleolus);GO:0005739(mitochondrion);GO:0005753(mitochondrial proton-transporting ATP synthase complex);GO:0005774(vacuolar membrane);GO:0005794(Golgi apparatus);GO:0008270(zinc ion binding);GO:0…	ENOG4111IHJ(energy coupled proton transport, down electrochemical gradient)	K02138	F-type H+-transporting ATPase subunit d	-	brp00190(Oxidative phosphorylation)	D7LU48.1 PF05873.10;Mt_ATP-synt_D;
A04	BjuA015212	5190819	5192471	1335	G1/G3	unnamed protein product [Brassica rapa]	IQD1	Protein IQ-DOMAIN 1 OS=Arabidopsis thaliana GN=IQD1 PE=1 SV=1	GO:0005516(calmodulin binding);GO:0005634(nucleus);GO:0005730(nucleolus);GO:0005886(plasma membrane);GO:0008150(biological_process)	ENOG4111IYP(IQ-domain)	-	-	-	-	-
A04	BjuA015213	5208853	5214468	1884	G1/G3	uncharacterized protein LOC106445679 isoform X1 [Brassica napus]	-	-	GO:0003674(molecular_function);GO:0005634(nucleus);GO:0008150(biological_process)	ENOG410Z67J(NA)	-	-	-	-	-
A04	BjuA015214	5215066	5221052	1917	G1/G3	PREDICTED: dihydrolipoyllysine-residue acetyltransferase component 1 of pyruvate dehydrogenase complex, mitochondrial isoform X2 [Brassica rapa]	LTA3	Dihydrolipoyllysine-residue acetyltransferase component 1 of pyruvate dehydrogenase complex, mitochondrial OS=Arabidopsis thaliana GN=LTA3 PE=1 SV=2	GO:0000166(nucleotide binding);GO:0004742(dihydrolipoyllysine-residue acetyltransferase activity);GO:0005739(mitochondrion);GO:0005759(mitochondrial matrix);GO:0006006(glucose metabolic process);GO:0006086(acetyl-CoA biosynthetic process from pyruvate);GO:0006099(tricarboxylic acid cycle);GO:0030431(sleep);GO:0034604(pyruvate dehydrogenase (NAD+) activity);GO:0042802(identical protein binding);GO…	COG0508(Dehydrogenase)	K00627	pyruvate dehydrogenase E2 component (dihydrolipoamide acetyltransferase)	EC:2.3.1.12	brp00010(Glycolysis / Gluconeogenesis);brp00020(Citrate cycle (TCA cycle));brp00620(Pyruvate metabolism)	A0A0D3BYK1.1 PF00198.21;2-oxoacid_dh;
A04	BjuA015215	5229855	5236761	2025	G1/G3	PREDICTED: SEC12-like protein 1 [Brassica rapa]	PHF1	SEC12-like protein 1 OS=Arabidopsis thaliana GN=PHF1 PE=1 SV=2	GO:0000166(nucleotide binding);GO:0003400(regulation of COPII vesicle coating);GO:0005090(Sar guanyl-nucleotide exchange factor activity);GO:0005096(GTPase activator activity);GO:0005515(protein binding);GO:0005737(cytoplasm);GO:0005783(endoplasmic reticulum);GO:0005886(plasma membrane);GO:0006817(phosphate ion transport);GO:0006888(ER to Golgi vesicle-mediated transport);GO:0009306(protein secre…	ENOG410XRQK(Prolactin regulatory element binding)	K14003	prolactin regulatory element-binding protein	-	brp04141(Protein processing in endoplasmic reticulum)	M4EXB2.1 PF00782.18;DSPc;
A04	BjuA015216	5237495	5239329	1365	G1/G3	hypothetical protein BRARA_D00608 [Brassica rapa]	-	-	GO:0003677(DNA binding);GO:0008150(biological_process)	ENOG410YU0Z(NA)	-	-	-	-	-
A04	BjuA015217	5240397	5241390	765	G1/G3	PREDICTED: 30S ribosomal protein 2, chloroplastic-like [Brassica rapa]	PSRP2	30S ribosomal protein 2, chloroplastic OS=Spinacia oleracea GN=PSRP2 PE=1 SV=1	GO:0003697(single-stranded DNA binding);GO:0003723(RNA binding);GO:0005840(ribosome);GO:0009409(response to cold);GO:0009414(response to water deprivation);GO:0009507(chloroplast);GO:0009535(chloroplast thylakoid membrane);GO:0009570(chloroplast stroma);GO:0009579(thylakoid);GO:0009651(response to salt stress);GO:0009941(chloroplast envelope);GO:0010029(regulation of seed germination);GO:0019843(…	ENOG410YC5S(RNA recognition motif (RRM)-containing protein)	K13126	polyadenylate-binding protein	-	brp03013(RNA transport);brp03015(mRNA surveillance pathway);brp03018(RNA degradation)	A0A078GDR4.1 PF00076.20;RRM_1;
A04	BjuA015218	5243776	5251657	4119	G1/G3	PREDICTED: clustered mitochondria protein-like [Brassica rapa]	FMT	Clustered mitochondria protein OS=Arabidopsis thaliana GN=FMT PE=2 SV=1	GO:0003729(mRNA binding);GO:0005737(cytoplasm);GO:0007005(mitochondrion organization);GO:0048312(intracellular distribution of mitochondria)	ENOG410XQUQ(Involved in proper cytoplasmic distribution of mitochondria (By similarity))	NA	NA	NA	NA(NA)	A0A078CMG1.1 PF13236.4;CLU;
A04	BjuA015219	5266395	5266634	240	G1/G3	BnaA04g05690D [Brassica napus]	-	-	GO:0005576(extracellular region);GO:0006869(lipid transport);GO:0008289(lipid binding)	-	NA	NA	NA	NA(NA)	M4D8K9.1 PF14368.4;LTP_2;
A04	BjuA015220	5267287	5267736	450	G1/G3	SWAP (Suppressor-of-White-APricot)/surp domain-containing protein / D111/G-patch domain-containing protein [Arabidopsis thaliana]	At3g52120	SURP and G-patch domain-containing protein 1-like protein OS=Arabidopsis thaliana GN=At3g52120 PE=2 SV=1	GO:0003676(nucleic acid binding);GO:0003723(RNA binding);GO:0005622(intracellular);GO:0005634(nucleus);GO:0006396(RNA processing);GO:0006397(mRNA processing);GO:0008380(RNA splicing)	ENOG410ZSH4(RNA splicing)	NA	NA	NA	NA(NA)	-
A04	BjuA015221	5270466	5270603	138	G1/G3	-	-	-	-	-	-	-	-	-	-
A04	BjuA015222	5273744	5275558	1728	G1/G3	PREDICTED: protein gamma response 1 isoform X2 [Brassica rapa]	GR1	Protein gamma response 1 OS=Arabidopsis thaliana GN=GR1 PE=1 SV=2	GO:0000706(meiotic DNA double-strand break processing);GO:0003723(RNA binding);GO:0004519(endonuclease activity);GO:0005634(nucleus);GO:0006281(DNA repair);GO:0006396(RNA processing);GO:0006974(cellular response to DNA damage stimulus);GO:0007276(gamete generation);GO:0010212(response to ionizing radiation)	ENOG410XUEB(Protein gamma response)	NA	NA	NA	NA(NA)	A0A067L873.1 PF08573.8;SAE2;
A04	BjuA015223	5284686	5286288	1047	G1/G3	uncharacterized protein LOC106445667 isoform X2 [Brassica napus]	-	-	GO:0004527(exonuclease activity);GO:0005634(nucleus);GO:0008150(biological_process);GO:0016021(integral component of membrane)	ENOG410YJRQ(NA)	-	-	-	-	-
A04	BjuA015224	5286643	5286849	207	G1/G3	PREDICTED: uncharacterized protein LOC103863490 [Brassica rapa]	-	-	GO:0003674(molecular_function);GO:0008150(biological_process)	COG2940(Histone-lysine N-methyltransferase)	-	-	-	-	-
A04	BjuA015225	5292341	5295355	498	G1/G3	unnamed protein product [Brassica rapa]	NRPB11	DNA-directed RNA polymerases II, IV and V subunit 11 OS=Arabidopsis thaliana GN=NRPB11 PE=1 SV=1	GO:0001055(RNA polymerase II activity);GO:0005665(DNA-directed RNA polymerase II, core complex)	COG1761(DNA-dependent RNA polymerase catalyzes the transcription of DNA into RNA using the four ribonucleoside triphosphates as substrates)	K03008	DNA-directed RNA polymerase II subunit RPB11	-	brp00230(Purine metabolism);brp00240(Pyrimidine metabolism);brp03020(RNA polymerase)	A0A087G1J5.1 PF13656.4;RNA_pol_L_2;
A04	BjuA015226	5295579	5298197	2397	G1/G3	PREDICTED: cation/H(+) antiporter 28-like [Brassica rapa]	CHX28	Cation/H(+) antiporter 28 OS=Arabidopsis thaliana GN=CHX28 PE=2 SV=2	GO:0005451(monovalent cation:proton antiporter activity);GO:0006812(cation transport);GO:0006813(potassium ion transport);GO:0006885(regulation of pH);GO:0012505(endomembrane system);GO:0015299(solute:proton antiporter activity);GO:0015672(monovalent inorganic cation transport);GO:0016020(membrane);GO:0016021(integral component of membrane)	COG0475(Sodium hydrogen exchanger)	-	-	-	-	A0A078J9G8.1 PF00999.19;Na_H_Exchanger;
A04	BjuA015227	5300648	5301655	1008	G1/G3	uncharacterized protein BNAA04G05790D isoform X2 [Brassica napus]	-	-	GO:0008375(acetylglucosaminyltransferase activity);GO:0009506(plasmodesma);GO:0016020(membrane);GO:0016757(transferase activity, transferring glycosyl groups)	ENOG410YDIX(Core-2/I-Branching enzyme)	-	-	-	-	A0A078G9S5.1 PF02485.19;Branch;
A04	BjuA015228	5303322	5303585	264	G1/G3	-	-	-	-	-	-	-	-	-	-
A04	BjuA015229	5305080	5307741	1434	G1/G3	non-functional pseudokinase ZED1-like [Brassica napus]	ZED1	Non-functional pseudokinase ZED1 OS=Arabidopsis thaliana GN=ZED1 PE=1 SV=1	GO:0004674(protein serine/threonine kinase activity);GO:0005524(ATP binding);GO:0005886(plasma membrane);GO:0006468(protein phosphorylation);GO:0007166(cell surface receptor signaling pathway);GO:0016301(kinase activity);GO:0016310(phosphorylation)	COG0515(Serine Threonine protein kinase)	NA	NA	NA	NA(NA)	M4EXC6.1 PF00069.23;Pkinase;
A04	BjuA015230	5309299	5310650	711	G1/G3	hypothetical protein DY000_00003198 [Brassica cretica]	-	-	-	ENOG410Y65V(Retrotransposon protein)	-	-	-	-	A0A078IFS2.1 PF13456.4;RVT_3;
A04	BjuA015231	5313129	5315328	1629	G1/G3	zinc finger CCCH domain-containing protein 46-like [Brassica napus]	At3g51950	Zinc finger CCCH domain-containing protein 46 OS=Arabidopsis thaliana GN=At3g51950 PE=1 SV=1	GO:0003677(DNA binding);GO:0003723(RNA binding);GO:0003729(mRNA binding);GO:0004518(nuclease activity);GO:0005575(cellular_component);GO:0008150(biological_process);GO:0046872(metal ion binding)	ENOG410YCDX(zinc finger CCCH domain-containing protein)	-	-	-	-	A0A078GRE0.1 PF00076.20;RRM_1;
A04	BjuA015259	5653584	5656457	1248	G1/G3	PREDICTED: casein kinase I-like [Brassica rapa]	CKL11	Casein kinase 1-like protein 11 OS=Arabidopsis thaliana GN=CKL11 PE=1 SV=1	GO:0004674(protein serine/threonine kinase activity);GO:0005524(ATP binding);GO:0005634(nucleus);GO:0005737(cytoplasm);GO:0006468(protein phosphorylation);GO:0016301(kinase activity);GO:0016310(phosphorylation);GO:0046777(protein autophosphorylation)	ENOG410XQC0(serine threonine-protein kinase)	NA	NA	NA	NA(NA)	A0A0D3BYP9.1 PF00069.23;Pkinase;
A04	BjuA015260	5656889	5659941	2622	G1/G3	PREDICTED: kinesin-like protein KIN-10A [Brassica rapa]	KIN10A	Kinesin-like protein KIN-10A OS=Arabidopsis thaliana GN=KIN10A PE=1 SV=1	GO:0003777(microtubule motor activity);GO:0005524(ATP binding);GO:0005622(intracellular);GO:0005623(cell);GO:0005737(cytoplasm);GO:0005874(microtubule);GO:0008017(microtubule binding);GO:0009524(phragmoplast);GO:0016887(ATPase activity);GO:0047496(vesicle transport along microtubule)	COG5059(Kinesin family member)	NA	NA	NA	NA(NA)	Q8VWI7.1 PF00225.21;Kinesin;
A04	BjuA015261	5664979	5665408	243	G1/G3	PREDICTED: uncharacterized protein LOC106293145 [Brassica oleracea var. oleracea]	-	-	GO:0005634(nucleus);GO:0008270(zinc ion binding);GO:0010200(response to chitin)	ENOG410XTFS(Ring finger protein)	NA	NA	NA	NA(NA)	Q501G9.1 PF00097.23;zf-C3HC4;
A04	BjuA015262	5666223	5666861	639	G1/G3	unnamed protein product [Brassica rapa]	-	-	GO:0000987(proximal promoter sequence-specific DNA binding);GO:0003677(DNA binding);GO:0003700(DNA binding transcription factor activity);GO:0005634(nucleus);GO:0006355(regulation of transcription, DNA-templated);GO:0045944(positive regulation of transcription by RNA polymerase II);GO:0046983(protein dimerization activity)	COG5068(Transcription factor)	-	-	-	-	-
A04	BjuA015263	5669467	5671939	327	G1/G3	unnamed protein product, partial [Brassica rapa]	-	-	-	-	-	-	-	-	-
A04	BjuA015264	5707463	5708856	558	G1/G3	PREDICTED: peroxisomal membrane protein PMP22 [Brassica rapa]	PMP22	Peroxisomal membrane protein PMP22 OS=Arabidopsis thaliana GN=PMP22 PE=1 SV=1	GO:0003674(molecular_function);GO:0005739(mitochondrion);GO:0008150(biological_process)	ENOG4111SYH(Peroxisomal membrane protein)	K13347	peroxisomal membrane protein 2	-	brp04146(Peroxisome)	A0A078IHG3.1 PF04117.10;Mpv17_PMP22;
A04	BjuA015265	5723277	5725019	1401	G1/G3	PREDICTED: putative F-box/LRR-repeat protein At3g28410 [Brassica rapa]	At3g28410	Putative F-box/LRR-repeat protein At3g28410 OS=Arabidopsis thaliana GN=At3g28410 PE=4 SV=2	GO:0003674(molecular_function);GO:0005634(nucleus);GO:0008150(biological_process)	ENOG410ZC2N(F-box domain containing protein, expressed)	NA	NA	NA	NA(NA)	A0A078IET3.1 PF00646.31;F-box;
A04	BjuA015266	5726009	5729631	960	G1/G3	hypothetical protein BRARA_D00653 [Brassica rapa]	-	-	-	ENOG410ZJGG(Transposon protein)	-	-	-	-	A0A087GY73.1 PF03108.13;DBD_Tnp_Mut;
A04	BjuA016981	21720660	21721245	420	G1/G3	PREDICTED: cytochrome B5 [Brassica rapa]	CYTB5-C	Cytochrome B5 isoform C OS=Arabidopsis thaliana GN=CYTB5-C PE=1 SV=1	GO:0020037(heme binding)	COG5274(cytochrome b5)	K10534	nitrate reductase (NAD(P)H)	EC:1.7.1.1 1.7.1.2 1.7.1.3	pxb00910(Nitrogen metabolism)	A0A0D3BNR7.1 PF00173.26;Cyt-b5;
A04	BjuA016982	21733135	21735911	1629	G1/G3	unnamed protein product [Brassica rapa]	ATJ13	Chaperone protein dnaJ 13 OS=Arabidopsis thaliana GN=ATJ13 PE=1 SV=2	GO:0005515(protein binding);GO:0006457(protein folding);GO:0009507(chloroplast);GO:0009536(plastid);GO:0009644(response to high light intensity);GO:0010228(vegetative to reproductive phase transition of meristem);GO:0016021(integral component of membrane);GO:0055122(response to very low light intensity stimulus)	COG0484(ATP binding to DnaK triggers the release of the substrate protein, thus completing the reaction cycle. Several rounds of ATP-dependent interactions between DnaJ, DnaK and GrpE are required for fully efficient folding. Also involved, together with DnaK and GrpE, in the DNA replication of plasmids through activation of initiation proteins (By similarity))	NA	NA	NA	NA(NA)	A0A078HT37.1 PF11875.6;DUF3395;
A04	BjuA016983	21736367	21737222	336	G1/G3	PREDICTED: uncharacterized protein LOC103865475 isoform X1 [Brassica rapa]	-	-	GO:0005739(mitochondrion);GO:0030001(metal ion transport);GO:0046872(metal ion binding)	ENOG410ZAXK(Heavy-metal-associated domain)	-	-	-	-	M4DLB8.1 PF00403.24;HMA;
A04	BjuA016984	21739130	21739297	168	G1/G3	PREDICTED: uncharacterized protein LOC103865476 [Brassica rapa]	-	-	GO:0003674(molecular_function);GO:0008150(biological_process)	ENOG410Y5J2(NA)	-	-	-	-	A0A0D3C4E1.1 PF15054.4;DUF4535;
A04	BjuA016985	21739938	21742382	1743	G1/G3	hypothetical protein BRARA_D02161 [Brassica rapa]	INT3	Probable inositol transporter 3 OS=Arabidopsis thaliana GN=INT3 PE=2 SV=1	GO:0005351(carbohydrate:proton symporter activity);GO:0005355(glucose transmembrane transporter activity);GO:0005886(plasma membrane);GO:0015144(carbohydrate transmembrane transporter activity);GO:0016020(membrane);GO:0016021(integral component of membrane);GO:0046323(glucose import)	ENOG410XNQK(Transporter)	NA	NA	NA	NA(NA)	A0A078HRI1.1 PF00083.22;Sugar_tr;
A04	BjuA016986	21749469	21751142	771	G1/G3	PREDICTED: CASP-like protein 2B1 [Brassica rapa]	-	CASP-like protein 2B1 OS=Eutrema halophilum PE=2 SV=1	GO:0003954(NADH dehydrogenase activity);GO:0005886(plasma membrane);GO:0016021(integral component of membrane);GO:0051536(iron-sulfur cluster binding)	ENOG410YHDU(CASP-like protein)	-	-	-	-	M4DLB5.1 PF04535.10;DUF588;
A04	BjuA016987	21751489	21753780	1356	G1/G3	serine carboxypeptidase-like 28 [Brassica napus]	SCPL28	Serine carboxypeptidase-like 28 OS=Arabidopsis thaliana GN=SCPL28 PE=2 SV=2	GO:0004185(serine-type carboxypeptidase activity);GO:0005576(extracellular region);GO:0005773(vacuole);GO:0006508(proteolysis);GO:0051603(proteolysis involved in cellular protein catabolic process)	COG2939(carboxy-peptidase)	NA	NA	NA	NA(NA)	A0A087H2X1.1 PF00450.20;Peptidase_S10;
A04	BjuA016988	21755240	21757376	1341	G1/G3	PREDICTED: serine carboxypeptidase-like 26 isoform X2 [Brassica rapa]	SCPL26	Serine carboxypeptidase-like 26 OS=Arabidopsis thaliana GN=SCPL26 PE=2 SV=1	GO:0004185(serine-type carboxypeptidase activity);GO:0005576(extracellular region);GO:0005773(vacuole);GO:0006508(proteolysis);GO:0051603(proteolysis involved in cellular protein catabolic process)	COG2939(carboxy-peptidase)	NA	NA	NA	NA(NA)	A0A0D3C4E8.1 PF00450.20;Peptidase_S10;
A04	BjuA016989	21758520	21759600	747	G1/G3	unnamed protein product [Brassica rapa]	-	-	GO:0003674(molecular_function);GO:0005739(mitochondrion);GO:0008150(biological_process);GO:0016021(integral component of membrane)	ENOG4111HEE(transmembrane protein 70)	NA	NA	NA	NA(NA)	R0HUP2.1 PF06979.10;TMEM70;
A04	BjuA016990	21762498	21768067	1629	G1/G3	ubiquitin carboxyl-terminal hydrolase 10-like [Brassica napus]	UBP10	Ubiquitin carboxyl-terminal hydrolase 10 OS=Arabidopsis thaliana GN=UBP10 PE=2 SV=2	GO:0004197(cysteine-type endopeptidase activity);GO:0004843(thiol-dependent ubiquitin-specific protease activity);GO:0005634(nucleus);GO:0006511(ubiquitin-dependent protein catabolic process);GO:0016579(protein deubiquitination)	COG5560(ubiquitin carboxyl-terminal hydrolase)	K11839	ubiquitin carboxyl-terminal hydrolase 8	EC:3.4.19.12	boe04144(Endocytosis)	A0A078HUI8.1 PF00443.27;UCH;
A04	BjuA016991	21774887	21776359	1167	G1/G3	ubiquitin carboxyl-terminal hydrolase 10-like [Brassica napus]	UBP10	Ubiquitin carboxyl-terminal hydrolase 10 OS=Arabidopsis thaliana GN=UBP10 PE=2 SV=2	GO:0004197(cysteine-type endopeptidase activity);GO:0004843(thiol-dependent ubiquitin-specific protease activity);GO:0005634(nucleus);GO:0006511(ubiquitin-dependent protein catabolic process);GO:0016579(protein deubiquitination)	COG5560(ubiquitin carboxyl-terminal hydrolase)	K11839	ubiquitin carboxyl-terminal hydrolase 8	EC:3.4.19.12	boe04144(Endocytosis)	A0A078HUI8.1 PF00443.27;UCH;
A04	BjuA016992	21777398	21782860	819	G1/G3	unnamed protein product [Brassica rapa]	SPP2	Probable sucrose-phosphatase 2 OS=Arabidopsis thaliana GN=SPP2 PE=2 SV=2	GO:0000287(magnesium ion binding);GO:0005634(nucleus);GO:0005737(cytoplasm);GO:0005829(cytosol);GO:0005986(sucrose biosynthetic process);GO:0009506(plasmodesma);GO:0016757(transferase activity, transferring glycosyl groups);GO:0046686(response to cadmium ion);GO:0050307(sucrose-phosphate phosphatase activity)	COG0561(,hydrolase)	K07024	sucrose-6-phosphatase	EC:3.1.3.24	brp00500(Starch and sucrose metabolism)	D7LIL2.1 PF05116.11;S6PP;
A04	BjuA016993	21795044	21796955	345	G1/G3	hypothetical protein BRARA_D02169 [Brassica rapa]	SPP2	Probable sucrose-phosphatase 2 OS=Arabidopsis thaliana GN=SPP2 PE=2 SV=2	GO:0000287(magnesium ion binding);GO:0005634(nucleus);GO:0005737(cytoplasm);GO:0005829(cytosol);GO:0005986(sucrose biosynthetic process);GO:0009506(plasmodesma);GO:0016757(transferase activity, transferring glycosyl groups);GO:0046686(response to cadmium ion);GO:0050307(sucrose-phosphate phosphatase activity)	COG0561(,hydrolase)	K07024	sucrose-6-phosphatase	EC:3.1.3.24	eus00500(Starch and sucrose metabolism)	D7LIL2.1 PF05116.11;S6PP;
A04	BjuA016994	21802055	21803951	1329	G1/G3	fasciclin-like arabinogalactan protein 16 [Brassica napus]	FLA16	Fasciclin-like arabinogalactan protein 16 OS=Arabidopsis thaliana GN=FLA16 PE=2 SV=1	GO:0005576(extracellular region);GO:0007155(cell adhesion)	COG2335(Beta-Ig-H3 fasciclin)	-	-	-	-	A0A0J8BV42.1 PF02469.20;Fasciclin;
A04	BjuA016995	21818819	21820792	1545	G1/G3	calcium-dependent protein kinase 25-like [Brassica napus]	CPK25	Calcium-dependent protein kinase 25 OS=Arabidopsis thaliana GN=CPK25 PE=2 SV=1	GO:0004683(calmodulin-dependent protein kinase activity);GO:0005509(calcium ion binding);GO:0005516(calmodulin binding);GO:0005524(ATP binding);GO:0005634(nucleus);GO:0005737(cytoplasm);GO:0006468(protein phosphorylation);GO:0009738(abscisic acid-activated signaling pathway);GO:0009931(calcium-dependent protein serine/threonine kinase activity);GO:0016020(membrane);GO:0016301(kinase activity);GO:…	ENOG410XRMJ(calcium-dependent protein kinase)	K13412	calcium-dependent protein kinase	EC:2.7.11.1	bna04626(Plant-pathogen interaction)	V4MAQ6.1 PF00069.23;Pkinase;
A04	BjuA016996	21821661	21822460	588	G1/G3	PREDICTED: uncharacterized protein LOC103865492 [Brassica rapa]	-	-	GO:0003674(molecular_function);GO:0005634(nucleus);GO:0008150(biological_process)	ENOG410YQ5T(mal d 1-associated protein)	-	-	-	-	-
A04	BjuA042574	21839396	21840109	714	G1/G3	PREDICTED: uncharacterized protein LOC103865526 [Brassica rapa]	-	-	GO:0003674(molecular_function);GO:0005575(cellular_component);GO:0009061(anaerobic respiration)	-	-	-	-	-	-
A05	BjuA000631	19960525	19961694	1170	G1/G3	PREDICTED: leucine-rich repeat extensin-like protein 6 [Brassica rapa]	LRX6	Leucine-rich repeat extensin-like protein 6 OS=Arabidopsis thaliana GN=LRX6 PE=2 SV=1	GO:0005199(structural constituent of cell wall);GO:0005576(extracellular region);GO:0005618(cell wall);GO:0071555(cell wall organization)	ENOG410Y973(leucine-rich repeat extensin-like protein)	-	-	-	-	A0A078FF06.1 PF08263.10;LRRNT_2;
A05	BjuA001949	20139233	20139716	402	G1/G2	BnaC04g15650D [Brassica napus]	-	-	GO:0003674(molecular_function);GO:0005634(nucleus);GO:0008150(biological_process)	COG5068(Transcription factor)	-	-	-	-	-
A05	BjuA001950	20128060	20128605	369	G1/G2，G1/G3	PREDICTED: protein JAZ13 [Brassica rapa]	JAZ13	Protein JAZ13 OS=Arabidopsis thaliana GN=JAZ13 PE=1 SV=1	GO:0003714(transcription corepressor activity);GO:0005515(protein binding);GO:0005634(nucleus);GO:0009611(response to wounding);GO:0009867(jasmonic acid mediated signaling pathway);GO:0031347(regulation of defense response);GO:2000022(regulation of jasmonic acid mediated signaling pathway)	ENOG41108DA(NA)	-	-	-	-	-
A05	BjuA001951	20120406	20126981	2922	G1/G2，G1/G3	PREDICTED: uncharacterized protein LOC103869095 isoform X1 [Brassica rapa]	-	-	GO:0000290(deadenylation-dependent decapping of nuclear-transcribed mRNA);GO:0000932(P-body);GO:0003723(RNA binding);GO:0005515(protein binding);GO:0005634(nucleus);GO:0005783(endoplasmic reticulum);GO:0019827(stem cell population maintenance);GO:0033962(cytoplasmic mRNA processing body assembly)	ENOG410YXYM(expressed protein)	K12617	DNA topoisomerase 2-associated protein PAT1	-	bna03018(RNA degradation)	A0A0C4BBI9.1 PF09770.7;PAT1;
A05	BjuA001952	5979724	5980124	339	G1/G3	hypothetical protein BRARA_J01216, partial [Brassica rapa]	REM9	B3 domain-containing protein REM9 OS=Arabidopsis thaliana GN=REM9 PE=2 SV=1	GO:0003677(DNA binding);GO:0003700(DNA binding transcription factor activity);GO:0005634(nucleus);GO:0006351(transcription, DNA-templated);GO:0006355(regulation of transcription, DNA-templated);GO:0009409(response to cold);GO:0009941(chloroplast envelope)	ENOG410Z6HB(Transcriptional factor B3 family protein)	-	-	-	-	M4E0J0.1 PF02362.19;B3;
A05	BjuA001953	5983456	5985737	1128	G1/G3	hypothetical protein BRARA_E02022 [Brassica rapa]	UGT82A1	UDP-glycosyltransferase 82A1 OS=Arabidopsis thaliana GN=UGT82A1 PE=2 SV=1	GO:0008152(metabolic process);GO:0008194(UDP-glycosyltransferase activity);GO:0016757(transferase activity, transferring glycosyl groups)	COG1819(Transferase)	NA	NA	NA	NA(NA)	A0A0D2ZUJ7.1 PF00201.16;UDPGT;
A05	BjuA001954	5996279	5996683	405	G1/G2，G1/G3	PREDICTED: 60S ribosomal protein L27-3-like [Brassica rapa]	RPL27C	60S ribosomal protein L27-3 OS=Arabidopsis thaliana GN=RPL27C PE=2 SV=2	GO:0003735(structural constituent of ribosome);GO:0005622(intracellular);GO:0005737(cytoplasm);GO:0005829(cytosol);GO:0005840(ribosome);GO:0006412(translation);GO:0022625(cytosolic large ribosomal subunit);GO:0022626(cytosolic ribosome)	COG2163((ribosomal) protein)	K02901	large subunit ribosomal protein L27e	-	brp03010(Ribosome)	V4LV04.1 PF01777.16;Ribosomal_L27e;
A05	BjuA001955	6001752	6014680	2352	G1/G2，G1/G3	hypothetical protein BRARA_E02020, partial [Brassica rapa]	RLP12	Receptor-like protein 12 OS=Arabidopsis thaliana GN=RLP12 PE=2 SV=2	GO:0006952(defense response);GO:0007165(signal transduction);GO:0016020(membrane);GO:0016021(integral component of membrane)	COG4886(leucine Rich Repeat)	K20718	LRR receptor-like serine/threonine-protein kinase ERECTA	EC:2.7.11.1	csat04016(MAPK signaling pathway - plant)	A0A078FB64.1 PF08263.10;LRRNT_2;
A05	BjuA001956	6018864	6019142	279	G1/G2，G1/G3	-	-	-	-	-	-	-	-	-	-
A05	BjuA001957	6020079	6022606	2295	G1/G2，G1/G3	unnamed protein product [Brassica rapa]	-	-	GO:0003677(DNA binding);GO:0005634(nucleus);GO:0008150(biological_process);GO:0009506(plasmodesma);GO:0046983(protein dimerization activity)	ENOG410XWK2(transposon protein)	K05658	ATP-binding cassette, subfamily B (MDR/TAP), member 1	EC:3.6.3.44	mdm02010(ABC transporters)	A0A078HGC0.1 PF04937.13;DUF659;
A05	BjuA001958	6023133	6023443	213	G1/G2，G1/G3	PREDICTED: uncharacterized protein LOC103869109 [Brassica rapa]	-	-	GO:0003674(molecular_function);GO:0008150(biological_process);GO:0016021(integral component of membrane)	ENOG410ZB2F(NA)	-	-	-	-	-
A05	BjuA001959	6024001	6027079	1350	G1/G2，G1/G3	hypothetical protein BRARA_E02018 [Brassica rapa]	POP2	Gamma-aminobutyrate transaminase POP2, mitochondrial OS=Arabidopsis thaliana GN=POP2 PE=1 SV=1	GO:0030170(pyridoxal phosphate binding);GO:0042802(identical protein binding)	COG0161(Catalyzes the transfer of the alpha-amino group from S- adenosyl-L-methionine (SAM) to 7-keto-8-aminopelargonic acid (KAPA) to form 7,8-diaminopelargonic acid (DAPA). It is the only animotransferase known to utilize SAM as an amino donor (By similarity))	K16871	4-aminobutyrate---pyruvate transaminase	EC:2.6.1.96	brp00650(Butanoate metabolism);brp00250(Alanine, aspartate and glutamate metabolism)	A0A078FCA8.1 PF00202.19;Aminotran_3;
A05	BjuA001960	6030132	6032590	1050	G1/G2，G1/G3	PREDICTED: endoplasmic reticulum-Golgi intermediate compartment protein 3 [Brassica rapa]	ERGIC3	Endoplasmic reticulum-Golgi intermediate compartment protein 3 OS=Bos taurus GN=ERGIC3 PE=2 SV=1	GO:0003674(molecular_function);GO:0005783(endoplasmic reticulum);GO:0008150(biological_process);GO:0016021(integral component of membrane)	ENOG410XP7X(Endoplasmic reticulumgolgi intermediate compartment protein)	NA	NA	NA	NA(NA)	A0A0D3CHA2.1 PF07970.10;COPIIcoated_ERV;
A05	BjuA001961	6033359	6034136	690	G1/G2，G1/G3	PREDICTED: 40S ribosomal protein S10, mitochondrial isoform X1 [Brassica rapa]	RPS10	40S ribosomal protein S10, mitochondrial OS=Arabidopsis thaliana GN=RPS10 PE=2 SV=2	GO:0003735(structural constituent of ribosome);GO:0005739(mitochondrion);GO:0005763(mitochondrial small ribosomal subunit);GO:0006412(translation);GO:0009507(chloroplast);GO:0015935(small ribosomal subunit)	ENOG4112CVE(ribosomal protein s10)	K02946	small subunit ribosomal protein S10	-	brp03010(Ribosome)	D7L1N0.1 PF00338.20;Ribosomal_S10;
A05	BjuA001962	6041100	6042692	1080	G1/G2，G1/G3	ubiquinol oxidase 1a, mitochondrial isoform X1 [Brassica napus]	AOX1A	Ubiquinol oxidase 1a, mitochondrial OS=Arabidopsis thaliana GN=AOX1A PE=1 SV=2	GO:0005739(mitochondrion);GO:0005743(mitochondrial inner membrane);GO:0009409(response to cold);GO:0009916(alternative oxidase activity);GO:0016021(integral component of membrane);GO:0031930(mitochondria-nucleus signaling pathway);GO:0045333(cellular respiration);GO:0046872(metal ion binding);GO:0055114(oxidation-reduction process);GO:0070469(respiratory chain);GO:0102721(ubiquinol:oxygen oxidore…	ENOG410YFEH(alternative oxidase)	NA	NA	NA	NA(NA)	A0A087HBM3.1 PF01786.15;AOX;
A05	BjuA001963	6053547	6059326	4734	G1/G2，G1/G3	hypothetical protein BRARA_E01719 [Brassica rapa]	TIC	Protein TIME FOR COFFEE OS=Arabidopsis thaliana GN=TIC PE=1 SV=2	GO:0003674(molecular_function);GO:0005634(nucleus);GO:0005982(starch metabolic process);GO:0006979(response to oxidative stress);GO:0009414(response to water deprivation);GO:0009737(response to abscisic acid);GO:0032502(developmental process);GO:0042752(regulation of circadian rhythm);GO:0048511(rhythmic process)	ENOG410Y4BV(Protein TIME FOR)	-	-	-	-	-
A05	BjuA001964	6062462	6063913	1452	G1/G2，G1/G3	BnaA05g13840D [Brassica napus]	-	-	GO:0003676(nucleic acid binding);GO:0005634(nucleus);GO:0008150(biological_process)	ENOG410Y65V(Retrotransposon protein)	K02716	photosystem II oxygen-evolving enhancer protein 1	-	boe00195(Photosynthesis)	V4LV19.1 PF14111.4;DUF4283;
A05	BjuA001965	6068912	6069900	339	G1/G2，G1/G3	40S ribosomal protein S23-like [Brassica napus]	RPS23	40S ribosomal protein S23 OS=Bos taurus GN=RPS23 PE=2 SV=1	GO:0003735(structural constituent of ribosome);GO:0006412(translation);GO:0022627(cytosolic small ribosomal subunit)	COG0048(Interacts with and stabilizes bases of the 16S rRNA that are involved in tRNA selection in the A site and with the mRNA backbone. Located at the interface of the 30S and 50S subunits, it traverses the body of the 30S subunit contacting proteins on the other side and probably holding the rRNA structure together. The combined cluster of proteins S8, S12 and S17 appears to hold together the …	K02973	small subunit ribosomal protein S23e	-	bna03010(Ribosome)	A0A0D3CXL7.1 PF00164.23;Ribosom_S12_S23;
A05	BjuA001966	6083020	6086489	1491	G1/G2，G1/G3	probable beta-1,3-galactosyltransferase 4 isoform X2 [Brassica napus]	B3GALT4	Probable beta-1,3-galactosyltransferase 4 OS=Arabidopsis thaliana GN=B3GALT4 PE=2 SV=1	GO:0000139(Golgi membrane);GO:0005794(Golgi apparatus);GO:0006486(protein glycosylation);GO:0008378(galactosyltransferase activity);GO:0016021(integral component of membrane);GO:0016757(transferase activity, transferring glycosyl groups);GO:0016758(transferase activity, transferring hexosyl groups)	ENOG410XV5H(Beta-1,3-galactosyltransferase)	NA	NA	NA	NA(NA)	M4D1S2.1 PF01762.19;Galactosyl_T;
A05	BjuA001967	6090999	6091508	285	G1/G2	hypothetical protein DY000_00003326 [Brassica cretica]	-	-	-	COG5536((alpha) subunit)	-	-	-	-	-
A05	BjuA006043	931415	932276	378	G1/G2	PREDICTED: transcription factor bHLH61-like [Brassica rapa]	-	-	GO:0005634(nucleus);GO:0046983(protein dimerization activity)	ENOG410YJUZ(NA)	-	-	-	-	-
A05	BjuA006044	932911	936620	792	G1/G2	hypothetical protein BRARA_E00168 [Brassica rapa]	At2g40450	Putative BTB/POZ domain-containing protein At2g40450 OS=Arabidopsis thaliana GN=At2g40450 PE=3 SV=1	GO:0005737(cytoplasm);GO:0043161(proteasome-mediated ubiquitin-dependent protein catabolic process)	ENOG410XQV8(meprin and TRAF homology domain-containing protein MATH domain-containing protein)	NA	NA	NA	NA(NA)	A0A078GBR8.1 PF00651.29;BTB;
A05	BjuA017743	949085	953151	1746	G1/G2	PREDICTED: protein NRT1/ PTR FAMILY 5.1-like [Brassica rapa]	NPF5.1	Protein NRT1/ PTR FAMILY 5.1 OS=Arabidopsis thaliana GN=NPF5.1 PE=2 SV=2	GO:0005215(transporter activity);GO:0005886(plasma membrane);GO:0006857(oligopeptide transport);GO:0009624(response to nematode);GO:0016020(membrane);GO:0016021(integral component of membrane);GO:0022857(transmembrane transporter activity);GO:0055085(transmembrane transport)	COG3104(transporter)	NA	NA	NA	NA(NA)	R0HBH8.1 PF00854.19;PTR2;
A05	BjuA017744	957817	958398	582	G1/G2	unnamed protein product [Brassica rapa]	-	-	GO:0003674(molecular_function);GO:0005634(nucleus);GO:0008150(biological_process)	ENOG410YV28(NA)	-	-	-	-	A0A0D3B625.1 PF05097.10;DUF688;
A05	BjuA017745	961762	962783	789	G1/G2	hypothetical protein BRARA_E00173 [Brassica rapa]	HEME2	Uroporphyrinogen decarboxylase 2, chloroplastic OS=Arabidopsis thaliana GN=HEME2 PE=2 SV=1	GO:0004853(uroporphyrinogen decarboxylase activity);GO:0005829(cytosol);GO:0006782(protoporphyrinogen IX biosynthetic process);GO:0006783(heme biosynthetic process);GO:0009507(chloroplast);GO:0009570(chloroplast stroma);GO:0009735(response to cytokinin);GO:0009941(chloroplast envelope);GO:0015995(chlorophyll biosynthetic process)	COG0407(Catalyzes the decarboxylation of four acetate groups of uroporphyrinogen-III to yield coproporphyrinogen-III (By similarity))	K01599	uroporphyrinogen decarboxylase	EC:4.1.1.37	bna00860(Porphyrin and chlorophyll metabolism)	A0A078DV07.1 PF01208.15;URO-D;
A05	BjuA017746	968687	970159	1257	G1/G2	unnamed protein product [Brassica rapa]	NAC006	NAC domain-containing protein 6 OS=Arabidopsis thaliana GN=NAC006 PE=1 SV=1	GO:0003677(DNA binding);GO:0003700(DNA binding transcription factor activity);GO:0005634(nucleus);GO:0006351(transcription, DNA-templated);GO:0006355(regulation of transcription, DNA-templated);GO:0007275(multicellular organism development)	-	-	-	-	-	M4CK45.1 PF02365.13;NAM;
A05	BjuA017747	972945	976906	1665	G1/G2	hypothetical protein BRARA_E00175 [Brassica rapa]	-	-	GO:0005634(nucleus);GO:0016021(integral component of membrane);GO:0016779(nucleotidyltransferase activity)	COG5260(domain) containing)	K03514	non-canonical poly(A) RNA polymerase PAPD5/7	EC:2.7.7.19	lang03018(RNA degradation)	M4CK42.1 PF01909.21;NTP_transf_2;
A05	BjuA017748	981679	982089	324	G1/G2	mini-chromosome maintenance complex-binding protein-like [Brassica napus]	ETG1	Mini-chromosome maintenance complex-binding protein OS=Arabidopsis thaliana GN=ETG1 PE=1 SV=1	GO:0000790(nuclear chromatin);GO:0003682(chromatin binding);GO:0005515(protein binding);GO:0005634(nucleus);GO:0006260(DNA replication);GO:0006261(DNA-dependent DNA replication);GO:0006301(postreplication repair);GO:0007062(sister chromatid cohesion);GO:0009941(chloroplast envelope);GO:0042555(MCM complex);GO:0043601(nuclear replisome);GO:0051301(cell division)	ENOG410XNU0(Minichromosome maintenance complex binding protein)	-	-	-	-	A0A0D3BNY1.1 PF09739.7;MCM_bind;
A05	BjuA017749	982379	983734	1356	G1/G2	unnamed protein product [Brassica rapa]	NAC006	NAC domain-containing protein 6 OS=Arabidopsis thaliana GN=NAC006 PE=1 SV=1	GO:0003677(DNA binding);GO:0003700(DNA binding transcription factor activity);GO:0005634(nucleus);GO:0006351(transcription, DNA-templated);GO:0006355(regulation of transcription, DNA-templated);GO:0007275(multicellular organism development)	-	-	-	-	-	M4CK45.1 PF02365.13;NAM;
A05	BjuA017750	984406	985595	570	G1/G2	PREDICTED: uncharacterized protein LOC103866509 [Brassica rapa]	XAC3343	Macro domain-containing protein XAC3343 OS=Xanthomonas axonopodis pv. citri (strain 306) GN=XAC3343 PE=3 SV=2	GO:0003674(molecular_function);GO:0005829(cytosol);GO:0008150(biological_process)	COG2110(appr-1-p processing domain protein)	-	-	-	-	A0A078GES3.1 PF01661.19;Macro;
A05	BjuA017751	996314	998434	1146	G1/G2，G1/G3	unnamed protein product [Brassica rapa]	At4g13780	Methionine--tRNA ligase, cytoplasmic OS=Arabidopsis thaliana GN=At4g13780 PE=2 SV=1	GO:0000049(tRNA binding);GO:0004812(aminoacyl-tRNA ligase activity);GO:0005737(cytoplasm);GO:0005829(cytosol);GO:0009506(plasmodesma)	COG0073(Is required not only for elongation of protein synthesis but also for the initiation of all mRNA translation through initiator tRNA(fMet) aminoacylation (By similarity))	NA	NA	NA	NA(NA)	Q93VB0.1 PF01588.18;tRNA_bind;
A05	BjuA017752	1000073	1006323	1863	G1/G2，G1/G3	unnamed protein product [Brassica rapa]	RH17	DEAD-box ATP-dependent RNA helicase 17 OS=Arabidopsis thaliana GN=RH17 PE=2 SV=1	GO:0003723(RNA binding);GO:0005524(ATP binding);GO:0005634(nucleus);GO:0008026(ATP-dependent helicase activity)	ENOG410XNT7(atp-dependent rna helicase)	NA	NA	NA	NA(NA)	R0HW22.1 PF00270.27;DEAD;
A05	BjuA017753	1009617	1009994	378	G1/G2，G1/G3	WRKY transcription factor 54 [Brassica rapa]	WRKY54	Probable WRKY transcription factor 54 OS=Arabidopsis thaliana GN=WRKY54 PE=2 SV=2	GO:0003700(DNA binding transcription factor activity);GO:0005515(protein binding);GO:0005634(nucleus);GO:0006351(transcription, DNA-templated);GO:0006355(regulation of transcription, DNA-templated);GO:0009751(response to salicylic acid);GO:0031347(regulation of defense response);GO:0043565(sequence-specific DNA binding);GO:1900056(negative regulation of leaf senescence)	ENOG4110835(WRKY)	-	-	-	-	-
A05	BjuA017754	1015755	1017467	1086	G1/G2，G1/G3	uncharacterized protein LOC106450689 [Brassica napus]	-	-	GO:0003674(molecular_function);GO:0005634(nucleus);GO:0005739(mitochondrion);GO:0008150(biological_process);GO:0016021(integral component of membrane)	ENOG410ZUKU(NA)	-	-	-	-	A0A059BJD6.1 PF08294.9;TIM21;
A05	BjuA017755	1032689	1033636	948	G1/G2，G1/G3	PREDICTED: probable E3 ubiquitin-protein ligase RHC1A [Brassica rapa]	RHC1A	Probable E3 ubiquitin-protein ligase RHC1A OS=Arabidopsis thaliana GN=RHC1A PE=2 SV=1	GO:0000209(protein polyubiquitination);GO:0005515(protein binding);GO:0005618(cell wall);GO:0005634(nucleus);GO:0006511(ubiquitin-dependent protein catabolic process);GO:0008270(zinc ion binding);GO:0009651(response to salt stress);GO:0009938(negative regulation of gibberellic acid mediated signaling pathway);GO:0016567(protein ubiquitination);GO:0043161(proteasome-mediated ubiquitin-dependent pr…	ENOG41121N2(zinc ion binding)	NA	NA	NA	NA(NA)	M4CK55.1 PF13639.4;zf-RING_2;
A05	BjuA017756	1034264	1038967	2853	G1/G2，G1/G3	4-alpha-glucanotransferase DPE2 [Brassica napus]	DPE2	4-alpha-glucanotransferase DPE2 OS=Arabidopsis thaliana GN=DPE2 PE=1 SV=1	GO:0000023(maltose metabolic process);GO:0000025(maltose catabolic process);GO:0004134(4-alpha-glucanotransferase activity);GO:0005829(cytosol);GO:0005976(polysaccharide metabolic process);GO:0005983(starch catabolic process);GO:0009507(chloroplast);GO:0010297(heteropolysaccharide binding);GO:0102500(beta-maltose 4-alpha-glucanotransferase activity);GO:2001070(starch binding)	COG1640(4-alpha-glucanotransferase)	K00705	4-alpha-glucanotransferase	EC:2.4.1.25	bna00500(Starch and sucrose metabolism)	M4CK56.1 PF02446.15;Glyco_hydro_77;
A05	BjuA017757	1045165	1047168	1185	G1/G2，G1/G3	hypothetical protein BRARA_E00194 [Brassica rapa]	At2g40900	WAT1-related protein At2g40900 OS=Arabidopsis thaliana GN=At2g40900 PE=2 SV=1	GO:0005576(extracellular region);GO:0005886(plasma membrane);GO:0015186(L-glutamine transmembrane transporter activity);GO:0016020(membrane);GO:0048316(seed development)	ENOG41105RD(Nodulin MtN21)	NA	NA	NA	NA(NA)	A0A0D3BNZ8.1 PF00892.18;EamA;
A05	BjuA017758	1057525	1058265	741	G1/G2，G1/G3	hypothetical protein BRARA_E00195 [Brassica rapa]	LUX	Transcription factor LUX OS=Arabidopsis thaliana GN=LUX PE=1 SV=1	GO:0003677(DNA binding);GO:0003700(DNA binding transcription factor activity);GO:0005634(nucleus);GO:0006351(transcription, DNA-templated);GO:0006355(regulation of transcription, DNA-templated);GO:0009409(response to cold)	ENOG411077A(MYB family transcription factor)	K14491	two-component response regulator ARR-B family	-	mpp04075(Plant hormone signal transduction)	A0A0K9PPX3.1 PF00249.29;Myb_DNA-binding;
A05	BjuA017759	1070068	1072016	975	G1/G2，G1/G3	probable protein S-acyltransferase 2 [Brassica napus]	PAT02	Probable protein S-acyltransferase 2 OS=Arabidopsis thaliana GN=PAT02 PE=2 SV=3	GO:0005634(nucleus);GO:0016021(integral component of membrane);GO:0019706(protein-cysteine S-palmitoyltransferase activity);GO:0030659(cytoplasmic vesicle membrane)	COG5273(Zinc finger, DHHC-type containing)	NA	NA	NA	NA(NA)	A0A078F0M4.1 PF01529.18;zf-DHHC;
A05	BjuA017845	2110816	2112657	1095	G1/G2	hypothetical protein BRARA_E00317 [Brassica rapa]	At2g42690	Phospholipase A1-IIdelta OS=Arabidopsis thaliana GN=At2g42690 PE=1 SV=1	GO:0004806(triglyceride lipase activity);GO:0005737(cytoplasm);GO:0006629(lipid metabolic process);GO:0008970(phosphatidylcholine 1-acylhydrolase activity);GO:0009507(chloroplast);GO:0009650(UV protection);GO:0016042(lipid catabolic process);GO:0071493(cellular response to UV-B)	COG3675(Lipase class 3 family protein)	K00145	N-acetyl-gamma-glutamyl-phosphate reductase	EC:1.2.1.38	csat00220(Arginine biosynthesis)	A0A078ILK1.1 PF01764.23;Lipase_3;
A05	BjuA017846	2112930	2113752	429	G1/G2	PREDICTED: multiprotein-bridging factor 1a [Brassica rapa]	MBF1A	Multiprotein-bridging factor 1a OS=Arabidopsis thaliana GN=MBF1A PE=2 SV=1	GO:0003677(DNA binding);GO:0003713(transcription coactivator activity);GO:0003729(mRNA binding);GO:0005634(nucleus);GO:0005730(nucleolus);GO:0006351(transcription, DNA-templated);GO:0009723(response to ethylene);GO:0043565(sequence-specific DNA binding);GO:0045893(positive regulation of transcription, DNA-templated)	COG1813(Factor 1)	NA	NA	NA	NA(NA)	A0A078ILD9.1 PF08523.8;MBF1;
A05	BjuA017847	2114526	2116199	714	G1/G2	PREDICTED: plant cysteine oxidase 4 [Brassica rapa]	PCO4	Plant cysteine oxidase 4 OS=Arabidopsis thaliana GN=PCO4 PE=1 SV=2	GO:0005634(nucleus);GO:0005737(cytoplasm);GO:0016702(oxidoreductase activity, acting on single donors with incorporation of molecular oxygen, incorporation of two atoms of oxygen);GO:0017172(cysteine dioxygenase activity);GO:0046872(metal ion binding);GO:0055114(oxidation-reduction process)	ENOG4111Y3H(2-aminoethanethiol)	K10712	cysteamine dioxygenase	EC:1.13.11.19	brp00430(Taurine and hypotaurine metabolism)	M4CKJ1.1 PF07847.10;PCO_ADO;
A05	BjuA017848	2116855	2117220	366	G1/G2	unnamed protein product [Eutrema halophilum]	MAX2	F-box protein MAX2 OS=Arabidopsis thaliana GN=MAX2 PE=1 SV=2	GO:0000151(ubiquitin ligase complex);GO:0004842(ubiquitin-protein transferase activity);GO:0005515(protein binding);GO:0005634(nucleus);GO:0006511(ubiquitin-dependent protein catabolic process);GO:0007568(aging);GO:0009414(response to water deprivation);GO:0009416(response to light stimulus);GO:0009734(auxin-activated signaling pathway);GO:0009926(auxin polar transport);GO:0009934(regulation of m…	ENOG4110R60(regulation of meristem structural organization)	NA	NA	NA	NA(NA)	-
A05	BjuA017849	2117258	2120773	2307	G1/G2	unnamed protein product, partial [Brassica rapa]	MPK20	Mitogen-activated protein kinase 20 OS=Arabidopsis thaliana GN=MPK20 PE=1 SV=2	GO:0004707(MAP kinase activity);GO:0005515(protein binding);GO:0005524(ATP binding);GO:0005634(nucleus);GO:0005737(cytoplasm);GO:0007165(signal transduction);GO:0010468(regulation of gene expression)	ENOG410XNY0(Mitogen-activated protein kinase)	K20538	mitogen-activated protein kinase 8	EC:2.7.11.24	atr04016(MAPK signaling pathway - plant)	M4C7U9.1 PF00069.23;Pkinase;
A05	BjuA017850	2125274	2128744	2283	G1/G2	hypothetical protein BRARA_E00321 [Brassica rapa]	ML2	Protein MEI2-like 2 OS=Arabidopsis thaliana GN=ML2 PE=2 SV=2	GO:0003723(RNA binding);GO:0005634(nucleus);GO:0045836(positive regulation of meiotic nuclear division);GO:0045927(positive regulation of growth);GO:0051321(meiotic cell cycle)	ENOG4111R9F(Rna-binding protein)	NA	NA	NA	NA(NA)	V4M9M3.1 PF04059.10;RRM_2;
A05	BjuA017851	2129083	2129841	759	G1/G2	PREDICTED: uncharacterized protein LOC103866677 [Brassica rapa]	-	-	GO:0003674(molecular_function);GO:0005575(cellular_component);GO:0008150(biological_process)	ENOG4111BHW(Peptidase of plants and bacteria)	-	-	-	-	M4CKJ4.1 PF04450.10;BSP;
A05	BjuA017852	2132889	2134622	1029	G1/G2	PREDICTED: ribose-phosphate pyrophosphokinase 4 [Brassica rapa]	PRS4	Ribose-phosphate pyrophosphokinase 4 OS=Arabidopsis thaliana GN=PRS4 PE=1 SV=2	GO:0004749(ribose phosphate diphosphokinase activity);GO:0005524(ATP binding);GO:0005737(cytoplasm);GO:0005829(cytosol);GO:0005886(plasma membrane);GO:0009116(nucleoside metabolic process);GO:0009165(nucleotide biosynthetic process);GO:0009506(plasmodesma);GO:0016301(kinase activity);GO:0016310(phosphorylation);GO:0046872(metal ion binding)	COG0462(Phosphoribosyl pyrophosphate synthase)	NA	NA	NA	NA(NA)	A0A087H4T2.1 PF00156.25;Pribosyltran;
A05	BjuA017853	2135130	2136785	1656	G1/G2	unnamed protein product [Brassica rapa]	PCMP-E75	Pentatricopeptide repeat-containing protein At2g42920, chloroplastic OS=Arabidopsis thaliana GN=PCMP-E75 PE=2 SV=1	GO:0009507(chloroplast)	ENOG410Z7Z7(Pentatricopeptide repeat-containing protein)	NA	NA	NA	NA(NA)	A0A0D3CF67.1 PF17177.2;PPR_long;
A05	BjuA017854	2137007	2137201	195	G1/G2	PREDICTED: AT-hook motif nuclear-localized protein 16 [Brassica oleracea var. oleracea]	AHL16	AT-hook motif nuclear-localized protein 16 OS=Arabidopsis thaliana GN=AHL16 PE=1 SV=1	GO:0003677(DNA binding);GO:0003680(AT DNA binding);GO:0003700(DNA binding transcription factor activity);GO:0005515(protein binding);GO:0005634(nucleus);GO:0006351(transcription, DNA-templated);GO:0006355(regulation of transcription, DNA-templated);GO:0010208(pollen wall assembly);GO:0010228(vegetative to reproductive phase transition of meristem);GO:0010529(negative regulation of transposition);…	ENOG41119VG(DNA-binding protein ESCAROLA-like)	-	-	-	-	-
A05	BjuA017855	2138714	2140702	1488	G1/G2	PREDICTED: probable receptor-like protein kinase At2g42960 [Brassica oleracea var. oleracea]	At2g42960	Probable receptor-like protein kinase At2g42960 OS=Arabidopsis thaliana GN=At2g42960 PE=3 SV=1	GO:0004674(protein serine/threonine kinase activity);GO:0005524(ATP binding);GO:0005886(plasma membrane);GO:0006468(protein phosphorylation);GO:0009507(chloroplast);GO:0016021(integral component of membrane);GO:0016301(kinase activity);GO:0016310(phosphorylation)	COG0515(Serine Threonine protein kinase)	NA	NA	NA	NA(NA)	V4MCZ0.1 PF00069.23;Pkinase;
A05	BjuA017856	2143060	2144625	1566	G1/G2	PREDICTED: aspartic proteinase nepenthesin-2 [Brassica rapa]	APF2	Aspartyl protease family protein 2 OS=Arabidopsis thaliana GN=APF2 PE=2 SV=1	GO:0005576(extracellular region);GO:0006508(proteolysis)	ENOG410XNV7(aspartic)	NA	NA	NA	NA(NA)	R0G1Y6.1 PF14543.4;TAXi_N;
A05	BjuA017857	2147562	2148701	1050	G1/G2	unnamed protein product [Brassica rapa]	At2g42990	GDSL esterase/lipase At2g42990 OS=Arabidopsis thaliana GN=At2g42990 PE=2 SV=1	GO:0005576(extracellular region);GO:0016042(lipid catabolic process);GO:0016788(hydrolase activity, acting on ester bonds);GO:0052689(carboxylic ester hydrolase activity)	COG3240(GDSL esterase lipase)	NA	NA	NA	NA(NA)	A0A078J0X6.1 PF00657.20;Lipase_GDSL;
A05	BjuA017858	2159180	2161683	1470	G1/G2	PREDICTED: probable polyamine oxidase 2 isoform X1 [Brassica rapa]	PAO2	Probable polyamine oxidase 2 OS=Arabidopsis thaliana GN=PAO2 PE=2 SV=1	GO:0005777(peroxisome);GO:0006598(polyamine catabolic process);GO:0008131(primary amine oxidase activity);GO:0046592(polyamine oxidase activity);GO:0055114(oxidation-reduction process)	ENOG410XQHS(Polyamine oxidase)	K17839	polyamine oxidase	EC:1.5.3.17 1.5.3.-	brp00330(Arginine and proline metabolism);brp00410(beta-Alanine metabolism)	M4CKK2.1 PF01593.22;Amino_oxidase;
A05	BjuA017859	2162370	2165285	2070	G1/G2	PREDICTED: uncharacterized protein LOC103866688 [Brassica rapa]	-	-	GO:0005516(calmodulin binding);GO:0005634(nucleus)	ENOG410XQ09(Tetratricopeptide repeat)	NA	NA	NA	NA(NA)	K3Z479.1 PF13432.4;TPR_16;
A05	BjuA017860	2170449	2172353	1569	G1/G2	PREDICTED: probable pectinesterase/pectinesterase inhibitor 16 [Brassica rapa]	PME16	Probable pectinesterase/pectinesterase inhibitor 16 OS=Arabidopsis thaliana GN=PME16 PE=2 SV=1	GO:0005576(extracellular region);GO:0005618(cell wall);GO:0009505(plant-type cell wall);GO:0030599(pectinesterase activity);GO:0042545(cell wall modification);GO:0045330(aspartyl esterase activity);GO:0045490(pectin catabolic process);GO:0046910(pectinesterase inhibitor activity);GO:0071944(cell periphery)	COG4677(pectinesterase)	K01051	pectinesterase	EC:3.1.1.11	thj00040(Pentose and glucuronate interconversions)	M4CKK4.1 PF01095.17;Pectinesterase;
A05	BjuA017861	2179872	2182595	1626	G1/G2	PREDICTED: signal peptide peptidase-like 3 [Brassica rapa]	SPPL3	Signal peptide peptidase-like 3 OS=Arabidopsis thaliana GN=SPPL3 PE=2 SV=1	GO:0004190(aspartic-type endopeptidase activity);GO:0005765(lysosomal membrane);GO:0005768(endosome);GO:0005774(vacuolar membrane);GO:0006508(proteolysis);GO:0008233(peptidase activity);GO:0010008(endosome membrane);GO:0016021(integral component of membrane);GO:0030660(Golgi-associated vesicle membrane);GO:0071458(integral component of cytoplasmic side of endoplasmic reticulum membrane);GO:007155…	ENOG410ZP52(signal peptide)	NA	NA	NA	NA(NA)	A0A078IXB5.1 PF04258.11;Peptidase_A22B;
A05	BjuA017862	2183620	2186245	855	G1/G2	prolyl 4-hydroxylase 1-like isoform X1 [Brassica napus]	P4H1	Prolyl 4-hydroxylase 1 OS=Arabidopsis thaliana GN=P4H1 PE=1 SV=1	GO:0004656(procollagen-proline 4-dioxygenase activity);GO:0005506(iron ion binding);GO:0005576(extracellular region);GO:0005789(endoplasmic reticulum membrane);GO:0005794(Golgi apparatus);GO:0016021(integral component of membrane);GO:0016706(oxidoreductase activity, acting on paired donors, with incorporation or reduction of molecular oxygen, 2-oxoglutarate as one donor, and incorporation of one …	ENOG410XS5J(prolyl 4-hydroxylase)	K00472	prolyl 4-hydroxylase	EC:1.14.11.2	bna00330(Arginine and proline metabolism)	Q9ZW86.1 PF03171.18;2OG-FeII_Oxy;
A05	BjuA017863	2187045	2187791	747	G1/G2	unnamed protein product [Brassica rapa]	At2g43090	3-isopropylmalate dehydratase small subunit 3 OS=Arabidopsis thaliana GN=At2g43090 PE=1 SV=1	GO:0003861(3-isopropylmalate dehydratase activity);GO:0005739(mitochondrion);GO:0009098(leucine biosynthetic process);GO:0009507(chloroplast);GO:0009536(plastid);GO:0009570(chloroplast stroma);GO:0009651(response to salt stress);GO:0009658(chloroplast organization);GO:0016836(hydro-lyase activity);GO:0019761(glucosinolate biosynthetic process);GO:0048229(gametophyte development)	COG0066(Catalyzes the isomerization between 2-isopropylmalate and 3-isopropylmalate, via the formation of 2-isopropylmaleate (By similarity))	K01704	3-isopropylmalate/(R)-2-methylmalate dehydratase small subunit	EC:4.2.1.33 4.2.1.35	bna00660(C5-Branched dibasic acid metabolism);bna00290(Valine, leucine and isoleucine biosynthesis)	B9H074.2 PF00694.17;Aconitase_C;
A05	BjuA017864	2188698	2189471	774	G1/G2	PREDICTED: 3-isopropylmalate dehydratase small subunit 1 [Brassica rapa]	IPMI2	3-isopropylmalate dehydratase small subunit 1 OS=Arabidopsis thaliana GN=IPMI2 PE=1 SV=1	GO:0003861(3-isopropylmalate dehydratase activity);GO:0009098(leucine biosynthetic process);GO:0009507(chloroplast);GO:0009536(plastid);GO:0009570(chloroplast stroma);GO:0016836(hydro-lyase activity);GO:0019761(glucosinolate biosynthetic process)	COG0066(Catalyzes the isomerization between 2-isopropylmalate and 3-isopropylmalate, via the formation of 2-isopropylmaleate (By similarity))	K21359	3-isopropylmalate/methylthioalkylmalate dehydratase small subunit	EC:4.2.1.33 4.2.1.170	brp00290(Valine, leucine and isoleucine biosynthesis);brp00966(Glucosinolate biosynthesis)	A0A078J0Y3.1 PF00694.17;Aconitase_C;
A05	BjuA017865	2198842	2201058	840	G1/G2	PREDICTED: protein CMSS1 [Brassica rapa]	Cmss1	Protein CMSS1 OS=Rattus norvegicus GN=Cmss1 PE=1 SV=1	GO:0003674(molecular_function);GO:0005634(nucleus);GO:0008150(biological_process)	ENOG410XPW6(cms1 ribosomal small subunit homolog (yeast))	-	-	-	-	M4CKL0.1 PF14617.4;CMS1;
A05	BjuA017866	2205025	2206569	954	G1/G2	PREDICTED: pirin-like protein 2 [Brassica rapa]	PRN2	Pirin-like protein 2 OS=Arabidopsis thaliana GN=PRN2 PE=1 SV=3	GO:0005515(protein binding);GO:0005516(calmodulin binding);GO:0005634(nucleus);GO:0005829(cytosol);GO:0005886(plasma membrane);GO:0030414(peptidase inhibitor activity);GO:0042742(defense response to bacterium);GO:0046872(metal ion binding)	COG1741(pirin domain protein)	NA	NA	NA	NA(NA)	A0A078IYM8.1 PF05726.11;Pirin_C;
A05	BjuA017867	2207739	2208655	639	G1/G2	unnamed protein product [Brassica rapa]	RABA5C	Ras-related protein RABA5c OS=Arabidopsis thaliana GN=RABA5C PE=1 SV=1	GO:0000139(Golgi membrane);GO:0003924(GTPase activity);GO:0005515(protein binding);GO:0005525(GTP binding);GO:0005794(Golgi apparatus);GO:0005795(Golgi stack);GO:0005798(Golgi-associated vesicle);GO:0005802(trans-Golgi network);GO:0005829(cytosol);GO:0005886(plasma membrane);GO:0006886(intracellular protein transport);GO:0009408(response to heat);GO:0048219(inter-Golgi cisterna vesicle-mediated t…	COG1100(GTP-binding Protein)	K07904	Ras-related protein Rab-11A	-	brp04144(Endocytosis)	A0A087H4V2.1 PF00071.20;Ras;
A05	BjuA018331	4987437	4990753	1440	G1/G3	hypothetical protein BRARA_E00881 [Brassica rapa]	FEI2	LRR receptor-like serine/threonine-protein kinase FEI 2 OS=Arabidopsis thaliana GN=FEI2 PE=1 SV=1	GO:0004674(protein serine/threonine kinase activity);GO:0005524(ATP binding);GO:0005886(plasma membrane);GO:0006468(protein phosphorylation);GO:0009664(plant-type cell wall organization);GO:0009826(unidimensional cell growth);GO:0010192(mucilage biosynthetic process);GO:0016021(integral component of membrane);GO:0016301(kinase activity);GO:0030244(cellulose biosynthetic process);GO:0048354(mucila…	COG0515(Serine Threonine protein kinase)	NA	NA	NA	NA(NA)	A0A0D3BRR2.1 PF00069.23;Pkinase;
A05	BjuA018332	4991060	4992403	1344	G1/G3	PREDICTED: probable aspartic protease At2g35615 [Brassica oleracea var. oleracea]	At2g35615	Probable aspartic protease At2g35615 OS=Arabidopsis thaliana GN=At2g35615 PE=3 SV=1	GO:0005576(extracellular region);GO:0006508(proteolysis)	ENOG410XNV7(aspartic)	NA	NA	NA	NA(NA)	A0A078CUC5.1 PF14543.4;TAXi_N;
A05	BjuA018333	4993200	4995052	1485	G1/G3	hypothetical protein BRARA_E00883 [Brassica rapa]	ROPGEF14	Rop guanine nucleotide exchange factor 14 OS=Arabidopsis thaliana GN=ROPGEF14 PE=1 SV=1	GO:0005089(Rho guanyl-nucleotide exchange factor activity);GO:0005739(mitochondrion);GO:0005886(plasma membrane);GO:0080092(regulation of pollen tube growth)	ENOG410YFCK(Guanine nucleotide exchange factor)	NA	NA	NA	NA(NA)	A0A078D728.1 PF03759.11;PRONE;
A05	BjuA018334	5004198	5005196	999	G1/G3	PREDICTED: uncharacterized protein LOC108844969 [Raphanus sativus]	-	-	GO:0008150(biological_process)	ENOG410Y65V(Retrotransposon protein)	NA	NA	NA	NA(NA)	D7MRG0.1 PF13966.4;zf-RVT;
A05	BjuA018335	5007841	5009598	1758	G1/G3	hypothetical protein BRARA_K01268, partial [Brassica rapa]	-	-	-	COG2124(Cytochrome p450)	K12598	ATP-dependent RNA helicase DOB1	EC:3.6.4.13	bna03018(RNA degradation)	M4EIV0.1 PF14111.4;DUF4283;
A05	BjuA018336	5013739	5016991	1941	G1/G3	arabinosyltransferase XEG113 [Brassica napus]	XEG113	Arabinosyltransferase XEG113 OS=Arabidopsis thaliana GN=XEG113 PE=2 SV=1	GO:0000139(Golgi membrane);GO:0005634(nucleus);GO:0005768(endosome);GO:0005794(Golgi apparatus);GO:0005802(trans-Golgi network);GO:0006486(protein glycosylation);GO:0016021(integral component of membrane);GO:0052325(cell wall pectin biosynthetic process);GO:0052636(arabinosyltransferase activity);GO:0080147(root hair cell development)	ENOG410ZPDM(Nucleotide-diphospho-sugar transferase)	K20784	arabinosyltransferase	EC:2.4.2.-	bna00514(Other types of O-glycan biosynthesis)	A0A0D3C4C1.1 PF03407.14;Nucleotid_trans;
A05	BjuA018337	5020825	5023369	1008	G1/G3	hypothetical protein BRARA_E00885 [Brassica rapa]	BRXL1	Protein Brevis radix-like 1 OS=Arabidopsis thaliana GN=BRXL1 PE=2 SV=2	GO:0003674(molecular_function);GO:0005634(nucleus);GO:0008150(biological_process)	ENOG410YFJP(protein BREVIS RADIX-like)	-	-	-	-	A0A078H3Q7.1 PF08381.9;BRX;
A05	BjuA018338	5025235	5025717	405	G1/G3	hypothetical protein BRARA_E00886 [Brassica rapa]	-	-	GO:0003674(molecular_function);GO:0005634(nucleus);GO:0008150(biological_process);GO:0016021(integral component of membrane)	ENOG410Y8EK(NA)	-	-	-	-	-
A05	BjuA018339	5027917	5029278	1134	G1/G3	hypothetical protein BRARA_E00887 [Brassica rapa]	At1g47710	Serpin-ZX OS=Arabidopsis thaliana GN=At1g47710 PE=1 SV=1	GO:0004867(serine-type endopeptidase inhibitor activity);GO:0005576(extracellular region);GO:0006508(proteolysis);GO:0008233(peptidase activity)	COG4826(serine-type endopeptidase inhibitor activity)	K14297	nuclear pore complex protein Nup98-Nup96	-	fve03013(RNA transport)	A0A078H1P3.1 PF00079.18;Serpin;
A05	BjuA018340	5033205	5035421	636	G1/G3	hypothetical protein BRARA_E00888 [Brassica rapa]	SCAMP4	Secretory carrier-associated membrane protein 4 OS=Arabidopsis thaliana GN=SCAMP4 PE=2 SV=1	GO:0005739(mitochondrion);GO:0005794(Golgi apparatus);GO:0005886(plasma membrane);GO:0015031(protein transport);GO:0016021(integral component of membrane);GO:0022857(transmembrane transporter activity);GO:0030658(transport vesicle membrane)	ENOG410XSJN(secretory carrier membrane protein)	NA	NA	NA	NA(NA)	A0A078GZ12.1 PF04144.11;SCAMP;
A05	BjuA018341	5036382	5039226	2046	G1/G3	unnamed protein product [Brassica rapa]	-	-	GO:0003674(molecular_function);GO:0005634(nucleus);GO:0008150(biological_process);GO:0016020(membrane)	ENOG410YCGI(Aminotransferase-like, plant mobile domain family protein)	-	-	-	-	A0A0D3BRT1.1 PF10536.7;PMD;
A05	BjuA018342	5039434	5041392	1314	G1/G3	hypothetical protein BRARA_E00890 [Brassica rapa]	dnaJ	Chaperone protein DnaJ OS=Helicobacter pylori (strain ATCC 700392 / 26695) GN=dnaJ PE=3 SV=1	GO:0005737(cytoplasm)	ENOG410YD1N(DNAJ heat shock N-terminal domain-containing protein)	NA	NA	NA	NA(NA)	A0A0D3BRT2.1 PF11926.6;DUF3444;
A05	BjuA018343	5041929	5042857	564	G1/G3	uncharacterized protein LOC111200015 [Brassica napus]	-	-	GO:0003674(molecular_function);GO:0005737(cytoplasm)	-	-	-	-	-	A0A087G8X4.1 PF00031.19;Cystatin;
A05	BjuA018344	5046059	5048548	1182	G1/G3	hypothetical protein BRARA_E00892 [Brassica rapa]	BZIP16	bZIP transcription factor 16 OS=Arabidopsis thaliana GN=BZIP16 PE=1 SV=1	GO:0003700(DNA binding transcription factor activity);GO:0005515(protein binding);GO:0005634(nucleus);GO:0006351(transcription, DNA-templated);GO:0042802(identical protein binding);GO:0043565(sequence-specific DNA binding);GO:0045893(positive regulation of transcription, DNA-templated)	ENOG410Y53Y(Transcription factor)	NA	NA	NA	NA(NA)	A0A078DA40.1 PF07777.9;MFMR;
A05	BjuA018345	5050654	5052836	1569	G1/G3	hypothetical protein BRARA_E00893 [Brassica rapa]	SRO1	Probable inactive poly [ADP-ribose] polymerase SRO1 OS=Arabidopsis thaliana GN=SRO1 PE=1 SV=2	GO:0003950(NAD+ ADP-ribosyltransferase activity);GO:0005634(nucleus);GO:0006970(response to osmotic stress);GO:0006979(response to oxidative stress);GO:0009651(response to salt stress);GO:0009793(embryo development ending in seed dormancy);GO:0010102(lateral root morphogenesis);GO:0016363(nuclear matrix);GO:0048573(photoperiodism, flowering)	ENOG410YCU9(inactive poly ADP-ribose polymerase RCD1-like)	-	-	-	-	D7LHX0.1 PF00644.18;PARP;
A05	BjuA018346	5063130	5064763	1086	G1/G3	hypothetical protein BRARA_E00895 [Brassica rapa]	PAP3	Plastid lipid-associated protein 3, chloroplastic OS=Brassica campestris GN=PAP3 PE=2 SV=1	GO:0005198(structural molecule activity);GO:0008150(biological_process);GO:0009507(chloroplast);GO:0009534(chloroplast thylakoid);GO:0009535(chloroplast thylakoid membrane);GO:0009536(plastid);GO:0009579(thylakoid);GO:0010287(plastoglobule)	ENOG4111HVZ(FiBrilliN)	-	-	-	-	M4CM99.1 PF04755.10;PAP_fibrillin;
A05	BjuA018347	5066375	5067137	588	G1/G3	BnaA05g08560D [Brassica napus]	-	-	GO:0003674(molecular_function);GO:0005739(mitochondrion);GO:0008150(biological_process);GO:0019031(viral envelope)	ENOG4110564(NA)	-	-	-	-	-
A05	BjuA018348	5067752	5068387	486	G1/G3	hypothetical protein BRARA_E00897 [Brassica rapa]	-	-	GO:0003674(molecular_function);GO:0005739(mitochondrion);GO:0008150(biological_process);GO:0016021(integral component of membrane)	ENOG41119RR(NA)	-	-	-	-	-
A05	BjuA018349	5069994	5070695	702	G1/G3	hypothetical protein BRARA_E00898 [Brassica rapa]	NHL3	NDR1/HIN1-Like protein 3 OS=Arabidopsis thaliana GN=NHL3 PE=1 SV=1	GO:0016021(integral component of membrane)	ENOG410YGQV(harpin-induced protein 1 domain containing protein, expressed)	-	-	-	-	M4CMA2.1 PF03168.11;LEA_2;
A05	BjuA018350	5071565	5073592	1053	G1/G3	hypothetical protein BRARA_E00899 [Brassica rapa]	-	-	GO:0009507(chloroplast);GO:0016787(hydrolase activity)	ENOG4111ANK(Amidohydrolase)	-	-	-	-	A0A078H2P9.1 PF04909.12;Amidohydro_2;
A05	BjuA018351	5074393	5075310	771	G1/G3	hypothetical protein BRARA_E00900 [Brassica rapa]	At2g35430	Zinc finger CCCH domain-containing protein 28 OS=Arabidopsis thaliana GN=At2g35430 PE=2 SV=1	GO:0003677(DNA binding);GO:0003700(DNA binding transcription factor activity);GO:0005515(protein binding);GO:0005634(nucleus);GO:0006355(regulation of transcription, DNA-templated);GO:0046872(metal ion binding)	ENOG410XW30(zinc finger)	NA	NA	NA	NA(NA)	A0A078D4Z6.1 PF00642.22;zf-CCCH;
A05	BjuA018352	5076229	5077065	837	G1/G3	hypothetical protein BRARA_E00901 [Brassica rapa]	ATL28	RING-H2 finger protein ATL28 OS=Arabidopsis thaliana GN=ATL28 PE=2 SV=1	GO:0005634(nucleus);GO:0008270(zinc ion binding);GO:0016021(integral component of membrane);GO:0016567(protein ubiquitination);GO:0016740(transferase activity);GO:0046872(metal ion binding)	ENOG41121N2(zinc ion binding)	NA	NA	NA	NA(NA)	A0A0D3BRW8.1 PF13639.4;zf-RING_2;
A05	BjuA018353	5083990	5085024	636	G1/G3	BnaA05g08640D [Brassica napus]	At2g43590	Endochitinase At2g43590 OS=Arabidopsis thaliana GN=At2g43590 PE=2 SV=1	GO:0000272(polysaccharide catabolic process);GO:0004568(chitinase activity);GO:0005576(extracellular region);GO:0006032(chitin catabolic process);GO:0006952(defense response);GO:0008061(chitin binding);GO:0016998(cell wall macromolecule catabolic process)	COG3979(chitinase)	K01183	chitinase	EC:3.2.1.14	brp00520(Amino sugar and nucleotide sugar metabolism)	A0A0D3BRU6.1 PF00182.17;Glyco_hydro_19;
A05	BjuA018364	5151101	5152990	1125	G1/G3	PREDICTED: uncharacterized protein LOC103867377 [Brassica rapa]	-	-	GO:0006508(proteolysis);GO:0008233(peptidase activity);GO:0009507(chloroplast);GO:0016021(integral component of membrane)	ENOG4110127(NA)	K01883	cysteinyl-tRNA synthetase	EC:6.1.1.16	brp00970(Aminoacyl-tRNA biosynthesis)	D7LHU4.1 PF02517.14;Abi;
A05	BjuA018365	5155919	5156917	702	G1/G3	PREDICTED: multiple organellar RNA editing factor 6, mitochondrial-like [Brassica rapa]	MORF6	Multiple organellar RNA editing factor 6, mitochondrial OS=Arabidopsis thaliana GN=MORF6 PE=2 SV=1	GO:0005739(mitochondrion);GO:0006397(mRNA processing);GO:0009507(chloroplast);GO:0080156(mitochondrial mRNA modification)	ENOG41106XY(NA)	K00655	1-acyl-sn-glycerol-3-phosphate acyltransferase	EC:2.3.1.51	sind00561(Glycerolipid metabolism);sind00564(Glycerophospholipid metabolism)	-
A05	BjuA018366	5158021	5159229	1209	G1/G3	hypothetical protein BRARA_E00915 [Brassica rapa]	IKU1	Protein HAIKU1 OS=Arabidopsis thaliana GN=IKU1 PE=1 SV=1	GO:0005515(protein binding);GO:0005634(nucleus);GO:0009960(endosperm development);GO:0043078(polar nucleus);GO:0080113(regulation of seed growth)	ENOG410YRKU(VQ motif)	-	-	-	-	-
A05	BjuA018367	5162715	5163032	318	G1/G3	PREDICTED: uncharacterized protein LOC103867380 [Brassica rapa]	-	-	GO:0003674(molecular_function);GO:0005634(nucleus);GO:0008150(biological_process)	ENOG41117NC(NA)	-	-	-	-	-
A05	BjuA018368	5165147	5165719	573	G1/G3	hypothetical protein BRARA_E00917 [Brassica rapa]	-	-	GO:0003674(molecular_function);GO:0005634(nucleus);GO:0008150(biological_process)	ENOG410YUVB(NA)	-	-	-	-	A0A078GP07.1 PF05340.10;DUF740;
A05	BjuA018369	5170969	5173092	2124	G1/G3	PREDICTED: histone-lysine N-methyltransferase, H3 lysine-9 specific SUVH5 [Brassica rapa]	SUVH5	Histone-lysine N-methyltransferase, H3 lysine-9 specific SUVH5 OS=Arabidopsis thaliana GN=SUVH5 PE=1 SV=1	GO:0000775(chromosome, centromeric region);GO:0005634(nucleus);GO:0005694(chromosome);GO:0008270(zinc ion binding);GO:0010200(response to chitin);GO:0010216(maintenance of DNA methylation);GO:0016571(histone methylation);GO:0018024(histone-lysine N-methyltransferase activity);GO:0031048(chromatin silencing by small RNA);GO:0034968(histone lysine methylation);GO:0040029(regulation of gene expressi…	COG2940(Histone-lysine N-methyltransferase);COG3440(ubiquitin-like with PHD and ring finger domains 2, E3 ubiquitin protein ligase)	K11420	euchromatic histone-lysine N-methyltransferase	EC:2.1.1.43	brp00310(Lysine degradation)	A0A0D3BRX6.1 PF02182.15;SAD_SRA;
A05	BjuA018370	5178522	5180983	1734	G1/G3	PREDICTED: uncharacterized protein LOC103867385 [Brassica rapa]	-	-	GO:0005575(cellular_component)	ENOG4110IB3(Peptidase, trypsin-like serine and cysteine proteases)	-	-	-	-	V4NYU5.1 PF08192.9;Peptidase_S64;
A05	BjuA018371	5182290	5183252	963	G1/G3	hypothetical protein BRARA_E00921 [Brassica rapa]	EXL7	Protein EXORDIUM-like 7 OS=Arabidopsis thaliana GN=EXL7 PE=2 SV=2	GO:0003674(molecular_function);GO:0005576(extracellular region);GO:0005615(extracellular space);GO:0008150(biological_process);GO:0048046(apoplast)	ENOG410YG55(Phosphate-induced protein 1 conserved region)	-	-	-	-	A0A078H4C6.1 PF04674.10;Phi_1;
A05	BjuA018372	5183682	5186034	2142	G1/G3	BnaA05g08800D [Brassica napus]	-	B2 protein OS=Daucus carota PE=2 SV=1	GO:0003674(molecular_function);GO:0005634(nucleus);GO:0008150(biological_process)	ENOG410YN39(DCD)	NA	NA	NA	NA(NA)	A0A078D7A5.1 PF10539.7;Dev_Cell_Death;
A05	BjuA018373	5188640	5191514	1800	G1/G3	PREDICTED: pentatricopeptide repeat-containing protein At2g35130 [Brassica rapa]	At2g35130	Pentatricopeptide repeat-containing protein At2g35130 OS=Arabidopsis thaliana GN=At2g35130 PE=2 SV=1	-	ENOG410Z7Z7(Pentatricopeptide repeat-containing protein)	-	-	-	-	A0A078D549.1 PF17177.2;PPR_long;
A05	BjuA018374	5191761	5192848	468	G1/G3	BnaA05g08820D [Brassica napus]	GDH2	Glycine cleavage system H protein 2, mitochondrial OS=Arabidopsis thaliana GN=GDH2 PE=2 SV=1	GO:0004375(glycine dehydrogenase (decarboxylating) activity);GO:0005524(ATP binding);GO:0005739(mitochondrion);GO:0005960(glycine cleavage complex);GO:0006546(glycine catabolic process);GO:0019464(glycine decarboxylation via glycine cleavage system)	COG0509(The glycine cleavage system catalyzes the degradation of glycine. The H protein shuttles the methylamine group of glycine from the P protein to the T protein (By similarity))	K02437	glycine cleavage system H protein	-	brp00630(Glyoxylate and dicarboxylate metabolism);brp00260(Glycine, serine and threonine metabolism)	A0A078D6B0.1 PF01597.17;GCV_H;
A05	BjuA018375	5194931	5202864	4197	G1/G3	hypothetical protein BRARA_E00925 [Brassica rapa]	NAP1	Protein NAP1 OS=Arabidopsis thaliana GN=NAP1 PE=1 SV=2	GO:0005515(protein binding);GO:0005634(nucleus);GO:0005789(endoplasmic reticulum membrane);GO:0005886(plasma membrane);GO:0007015(actin filament organization);GO:0009825(multidimensional cell growth);GO:0010090(trichome morphogenesis);GO:0016477(cell migration);GO:0031209(SCAR complex);GO:0045010(actin nucleation);GO:0045893(positive regulation of transcription, DNA-templated)	ENOG410XPQI(nck-associated protein)	-	-	-	-	V4NYU1.1 PF09735.7;Nckap1;
A05	BjuA018376	5205953	5207567	1353	G1/G3	PREDICTED: probable arabinosyltransferase ARAD1 [Brassica rapa]	ARAD1	Probable arabinosyltransferase ARAD1 OS=Arabidopsis thaliana GN=ARAD1 PE=1 SV=1	GO:0000139(Golgi membrane);GO:0003824(catalytic activity);GO:0005515(protein binding);GO:0005768(endosome);GO:0005794(Golgi apparatus);GO:0005802(trans-Golgi network);GO:0006486(protein glycosylation);GO:0016020(membrane);GO:0016021(integral component of membrane);GO:0016757(transferase activity, transferring glycosyl groups);GO:0045489(pectin biosynthetic process);GO:0071555(cell wall organizati…	ENOG410XTFH(Exostosin)	K01228	mannosyl-oligosaccharide glucosidase	EC:3.2.1.106	sita00510(N-Glycan biosynthesis);sita04141(Protein processing in endoplasmic reticulum)	V4LNJ4.1 PF03016.13;Exostosin;
A05	BjuA018377	5213539	5220861	2577	G1/G3	unnamed protein product [Brassica rapa]	purH	Bifunctional purine biosynthesis protein PurH OS=Syntrophomonas wolfei subsp. wolfei (strain DSM 2245B / Goettingen) GN=purH PE=3 SV=1	GO:0003937(IMP cyclohydrolase activity);GO:0004643(phosphoribosylaminoimidazolecarboxamide formyltransferase activity);GO:0006164(purine nucleotide biosynthetic process);GO:0009409(response to cold);GO:0009507(chloroplast);GO:0009536(plastid);GO:0009570(chloroplast stroma);GO:0010319(stromule)	COG0138(bifunctional purine biosynthesis protein PURH)	K00602	phosphoribosylaminoimidazolecarboxamide formyltransferase / IMP cyclohydrolase	EC:2.1.2.3 3.5.4.10	brp00230(Purine metabolism);brp00670(One carbon pool by folate)	O64767.1 PF01808.16;AICARFT_IMPCHas;
A05	BjuA018378	5221163	5222830	924	G1/G3	BnaA05g08870D [Brassica napus]	URED	Urease accessory protein D OS=Arabidopsis thaliana GN=URED PE=2 SV=1	GO:0005737(cytoplasm);GO:0006807(nitrogen compound metabolic process);GO:0016151(nickel cation binding);GO:1905182(positive regulation of urease activity)	COG0829(Required for maturation of urease via the functional incorporation of the urease nickel metallocenter (By similarity))	NA	NA	NA	NA(NA)	A0A078GYY2.1 PF01774.15;UreD;
A05	BjuA018379	5250710	5251897	1188	G1/G3	hypothetical protein BRARA_C03652 [Brassica rapa]	-	-	GO:0007165(signal transduction)	COG4886(leucine Rich Repeat)	-	-	-	-	A0A078D510.1 PF08263.10;LRRNT_2;
A05	BjuA018380	5252573	5255248	2133	G1/G3	hypothetical protein BRARA_C03653 [Brassica rapa]	YSL5	Probable metal-nicotianamine transporter YSL5 OS=Arabidopsis thaliana GN=YSL5 PE=1 SV=1	GO:0005886(plasma membrane);GO:0006857(oligopeptide transport);GO:0016021(integral component of membrane);GO:0022857(transmembrane transporter activity);GO:0055085(transmembrane transport)	COG1297(oligo-peptide transporter)	NA	NA	NA	NA(NA)	A0A087HAE0.1 PF03169.13;OPT;
A05	BjuA018381	5259479	5261359	1881	G1/G3	BnaA05g08880D [Brassica napus]	PCMP-E15	Pentatricopeptide repeat-containing protein At2g35030, mitochondrial OS=Arabidopsis thaliana GN=PCMP-E15 PE=2 SV=1	GO:0003723(RNA binding);GO:0004519(endonuclease activity);GO:0005739(mitochondrion);GO:0009451(RNA modification);GO:0043231(intracellular membrane-bounded organelle)	ENOG410Z7Z7(Pentatricopeptide repeat-containing protein)	NA	NA	NA	NA(NA)	J3M792.1 PF17177.2;PPR_long;
A05	BjuA018409	5969782	5970603	822	G1/G3	BnaA05g09190D [Brassica napus]	-	-	GO:0003674(molecular_function);GO:0005634(nucleus);GO:0008150(biological_process);GO:0016021(integral component of membrane)	ENOG410Z5IF(NA)	-	-	-	-	-
A05	BjuA018410	5966603	5967158	351	G1/G3	PREDICTED: protein TIFY 5B-like [Brassica rapa]	TIFY	Protein TIFY 5B OS=Arabidopsis thaliana GN=TIFY 5B PE=2 SV=1	GO:0003714(transcription corepressor activity);GO:0005634(nucleus);GO:0006351(transcription, DNA-templated);GO:0006355(regulation of transcription, DNA-templated);GO:0006952(defense response);GO:0009611(response to wounding);GO:0009753(response to jasmonic acid);GO:0010200(response to chitin);GO:0031347(regulation of defense response);GO:1903507(negative regulation of nucleic acid-templated trans…	ENOG41105HQ(jasmonate-zim-domain protein 7)	-	-	-	-	A0A078D4M8.1 PF06200.12;tify;
A05	BjuA018411	5961716	5962660	945	G1/G3	PREDICTED: alkylated DNA repair protein alkB homolog 8-like [Brassica rapa]	Alkbh8	Alkylated DNA repair protein alkB homolog 8 OS=Mus musculus GN=Alkbh8 PE=1 SV=1	GO:0002098(tRNA wobble uridine modification);GO:0005515(protein binding);GO:0008175(tRNA methyltransferase activity);GO:0009507(chloroplast);GO:0030488(tRNA methylation)	COG0500(Methyltransferase)	NA	NA	NA	NA(NA)	A0A078IVS3.1 PF08241.10;Methyltransf_11;
A05	BjuA018412	5960450	5961191	432	G1/G3	uncharacterized protein LOC106450282 [Brassica napus]	-	-	GO:0003674(molecular_function);GO:0005739(mitochondrion);GO:0008150(biological_process)	ENOG410YZ9X(Human Cytomegalovirus UL139 protein)	-	-	-	-	A0A0D3BS39.1 PF12507.6;HCMV_UL139;
A05	BjuA018413	5959033	5960109	1077	G1/G3	F-box/kelch-repeat protein At4g38940-like [Brassica napus]	At4g38940	F-box/kelch-repeat protein At4g38940 OS=Arabidopsis thaliana GN=At4g38940 PE=1 SV=1	GO:0003674(molecular_function);GO:0005634(nucleus);GO:0005737(cytoplasm);GO:0016567(protein ubiquitination)	ENOG4110X8D(Kelch repeat-containing F-box family protein)	-	-	-	-	M4CMH2.1 PF00646.31;F-box;
A05	BjuA018414	5951488	5952569	828	G1/G3	F-box/kelch-repeat protein At4g38940 [Brassica napus]	At4g38940	F-box/kelch-repeat protein At4g38940 OS=Arabidopsis thaliana GN=At4g38940 PE=1 SV=1	GO:0003674(molecular_function);GO:0005634(nucleus);GO:0005737(cytoplasm);GO:0016567(protein ubiquitination)	ENOG4110X8D(Kelch repeat-containing F-box family protein)	-	-	-	-	A0A078FY25.1 PF12937.5;F-box-like;
A05	BjuA018450	6102046	6102879	390	G1/G2	PREDICTED: uncharacterized protein At2g34160 [Brassica rapa]	At2g34160	Uncharacterized protein At2g34160 OS=Arabidopsis thaliana GN=At2g34160 PE=1 SV=1	GO:0003729(mRNA binding);GO:0005634(nucleus);GO:0005829(cytosol);GO:0005886(plasma membrane);GO:0008150(biological_process)	ENOG41121TC(Alba)	-	-	-	-	R0HVL0.1 PF01918.19;Alba;
A05	BjuA018451	6106683	6110509	2586	G1/G2	PREDICTED: protein SCAR1 [Brassica rapa]	SCAR1	Protein SCAR1 OS=Arabidopsis thaliana GN=SCAR1 PE=1 SV=1	GO:0003785(actin monomer binding);GO:0005515(protein binding);GO:0005737(cytoplasm);GO:0005856(cytoskeleton);GO:0016020(membrane);GO:0030036(actin cytoskeleton organization);GO:0031209(SCAR complex);GO:0043229(intracellular organelle);GO:0051127(positive regulation of actin nucleation);GO:0071944(cell periphery)	ENOG410XRBQ(WAS protein family, member)	K01595	phosphoenolpyruvate carboxylase	EC:4.1.1.31	pda00620(Pyruvate metabolism);pda00710(Carbon fixation in photosynthetic organisms)	-
A05	BjuA018452	6110834	6111891	543	G1/G2	PREDICTED: calcineurin subunit B-like [Brassica rapa]	cnbA	Calcineurin subunit B type 1 OS=Dictyostelium discoideum GN=cnbA PE=1 SV=1	GO:0005509(calcium ion binding);GO:0005773(vacuole)	COG5126(Calcium-binding protein)	NA	NA	NA	NA(NA)	M4CML3.1 PF13499.4;EF-hand_7;
A05	BjuA018453	6114986	6117089	1167	G1/G2	protein starmaker isoform X1 [Brassica napus]	-	-	GO:0003674(molecular_function);GO:0005576(extracellular region);GO:0008150(biological_process)	ENOG4111DIZ(NA)	-	-	-	-	-
A05	BjuA018454	6126321	6128724	1332	G1/G2	PREDICTED: uncharacterized protein YNL011C isoform X2 [Brassica rapa]	YNL011C	Uncharacterized protein YNL011C OS=Saccharomyces cerevisiae (strain ATCC 204508 / S288c) GN=YNL011C PE=1 SV=1	GO:0003674(molecular_function);GO:0005575(cellular_component);GO:0009793(embryo development ending in seed dormancy);GO:0048868(pollen tube development)	COG0391(Catalyzes the transfer of the 2-phospholactate moiety from lactyl (2) diphospho-(5')guanosine (LPPG) to 7,8-didemethyl- 8-hydroxy-5-deazariboflavin (FO) with the formation of the L- lactyl phosphodiester of 7,8-didemethyl-8-hydroxy-5- deazariboflavin (F420-0) and GMP (By similarity))	K01365	cathepsin L	EC:3.4.22.15	zju04145(Phagosome)	A0A0D3BSA0.1 PF01933.16;UPF0052;
A05	BjuA019288	15008309	15009998	939	G1/G3	PREDICTED: transcription factor bHLH95-like [Brassica rapa]	BHLH95	Transcription factor bHLH95 OS=Arabidopsis thaliana GN=BHLH95 PE=2 SV=2	GO:0003677(DNA binding);GO:0003700(DNA binding transcription factor activity);GO:0005634(nucleus);GO:0006351(transcription, DNA-templated);GO:0006355(regulation of transcription, DNA-templated);GO:0009793(embryo development ending in seed dormancy);GO:0046983(protein dimerization activity)	ENOG410YBAA(Transcription factor)	NA	NA	NA	NA(NA)	A0A0D3CFW8.1 PF00010.24;HLH;
A05	BjuA019289	15036512	15038323	1668	G1/G3	PREDICTED: uncharacterized protein At4g06744-like [Brassica rapa]	At4g06744	Uncharacterized protein At4g06744 OS=Arabidopsis thaliana GN=At4g06744 PE=2 SV=1	GO:0005886(plasma membrane);GO:0009507(chloroplast)	COG4886(leucine Rich Repeat)	-	-	-	-	A0A078DX68.1 PF13855.4;LRR_8;
A05	BjuA019290	15060316	15061526	447	G1/G3	PREDICTED: uncharacterized protein LOC108871997 [Brassica rapa]	-	-	-	-	-	-	-	-	-
A05	BjuA019291	15061865	15062821	957	G1/G3	PREDICTED: probable carboxylesterase 5 [Brassica rapa]	CXE5	Probable carboxylesterase 5 OS=Arabidopsis thaliana GN=CXE5 PE=2 SV=1	GO:0005634(nucleus);GO:0009056(catabolic process);GO:0052689(carboxylic ester hydrolase activity)	COG0657(alpha beta hydrolase fold-3 domain protein)	NA	NA	NA	NA(NA)	A0A0D3CFV9.1 PF07859.11;Abhydrolase_3;
A05	BjuA019292	15071574	15073908	1173	G1/G3	unnamed protein product [Brassica rapa]	RBP47A	Polyadenylate-binding protein RBP47A OS=Arabidopsis thaliana GN=RBP47A PE=2 SV=1	GO:0003723(RNA binding);GO:0003729(mRNA binding);GO:0005829(cytosol);GO:0009735(response to cytokinin)	COG0724(Rna-binding protein)	K03231	elongation factor 1-alpha	-	cam03013(RNA transport)	R0GWV6.1 PF00076.20;RRM_1;
A05	BjuA019293	15075999	15077322	978	G1/G3	PREDICTED: myb family transcription factor EFM-like [Brassica rapa]	EFM	Myb family transcription factor EFM OS=Arabidopsis thaliana GN=EFM PE=1 SV=2	GO:0003677(DNA binding);GO:0003700(DNA binding transcription factor activity);GO:0005634(nucleus);GO:0006351(transcription, DNA-templated);GO:0006355(regulation of transcription, DNA-templated)	ENOG41104MD(MYB family transcription factor)	K14491	two-component response regulator ARR-B family	-	brp04075(Plant hormone signal transduction)	A0A087H1J9.1 PF00249.29;Myb_DNA-binding;
A05	BjuA019294	15092166	15092675	510	G1/G3	PREDICTED: uncharacterized protein LOC103849348 [Brassica rapa]	-	-	-	ENOG410Y65V(Retrotransposon protein)	K01188	beta-glucosidase	EC:3.2.1.21	bna00500(Starch and sucrose metabolism);bna00460(Cyanoamino acid metabolism);bna00940(Phenylpropanoid biosynthesis)	-
A05	BjuA019295	15097717	15098230	414	G1/G3	PREDICTED: uncharacterized protein LOC103849350 [Brassica rapa]	ELP2	Elongator complex protein 2 OS=Arabidopsis thaliana GN=ELP2 PE=1 SV=1	-	ENOG410XRF0(elongator acetyltransferase complex subunit 2)	NA	NA	NA	NA(NA)	-
A05	BjuA019296	15098763	15099029	267	G1/G3	BnaA05g16100D [Brassica napus]	-	-	-	ENOG410XRF0(elongator acetyltransferase complex subunit 2)	-	-	-	-	-
A05	BjuA019297	15099601	15100558	672	G1/G3	PREDICTED: uncharacterized protein LOC103849351 [Brassica rapa]	-	-	GO:0003674(molecular_function);GO:0009507(chloroplast);GO:0009658(chloroplast organization);GO:0009793(embryo development ending in seed dormancy);GO:0016021(integral component of membrane)	ENOG410YIS3(NA)	NA	NA	NA	NA(NA)	-
A05	BjuA019298	15147804	15148163	297	G1/G3	unnamed protein product [Brassica rapa]	-	-	GO:0003743(translation initiation factor activity);GO:0006413(translational initiation)	-	-	-	-	-	-
A05	BjuA019299	15161476	15164376	978	G1/G3	PREDICTED: B3 domain-containing protein REM19-like [Brassica rapa]	REM19	B3 domain-containing protein REM19 OS=Arabidopsis thaliana GN=REM19 PE=1 SV=1	GO:0003677(DNA binding);GO:0003700(DNA binding transcription factor activity);GO:0005515(protein binding);GO:0005634(nucleus);GO:0005886(plasma membrane);GO:0006351(transcription, DNA-templated);GO:0006355(regulation of transcription, DNA-templated);GO:0009409(response to cold);GO:0034613(cellular protein localization)	-	-	-	-	-	A0A0D3ACE5.1 PF02362.19;B3;
A05	BjuA019300	15177264	15181842	1998	G1/G3	PREDICTED: long chain acyl-CoA synthetase 2 [Brassica rapa]	LACS2	Long chain acyl-CoA synthetase 2 OS=Arabidopsis thaliana GN=LACS2 PE=2 SV=1	GO:0003824(catalytic activity);GO:0004467(long-chain fatty acid-CoA ligase activity);GO:0005524(ATP binding);GO:0005634(nucleus);GO:0005783(endoplasmic reticulum);GO:0006631(fatty acid metabolic process);GO:0006633(fatty acid biosynthetic process);GO:0008152(metabolic process);GO:0009506(plasmodesma);GO:0010025(wax biosynthetic process);GO:0010143(cutin biosynthetic process);GO:0010311(lateral ro…	COG1022(Amp-dependent synthetase and ligase)	K01897	long-chain acyl-CoA synthetase	EC:6.2.1.3	brp00061(Fatty acid biosynthesis);brp00071(Fatty acid degradation);brp04146(Peroxisome)	M4EU02.1 PF00501.26;AMP-binding;
A05	BjuA019301	15183326	15185080	915	G1/G3	PREDICTED: uncharacterized protein LOC103868653 isoform X2 [Brassica rapa]	-	-	GO:0005737(cytoplasm);GO:0016301(kinase activity);GO:0016310(phosphorylation);GO:0016773(phosphotransferase activity, alcohol group as acceptor)	COG0524(pfkb domain protein)	NA	NA	NA	NA(NA)	A0A078GUZ2.1 PF00294.22;PfkB;
A05	BjuA019302	15185774	15186166	393	G1/G3	PREDICTED: probable calcium-binding protein CML34 [Brassica rapa]	CML34	Probable calcium-binding protein CML34 OS=Arabidopsis thaliana GN=CML34 PE=1 SV=1	GO:0005509(calcium ion binding);GO:0005575(cellular_component);GO:0008150(biological_process)	COG5126(Calcium-binding protein)	K13448	calcium-binding protein CML	-	brp04626(Plant-pathogen interaction)	M4EU00.1 PF13499.4;EF-hand_7;
A05	BjuA019303	15187590	15198805	5820	G1/G3	unnamed protein product [Brassica oleracea]	PI4KA1	Phosphatidylinositol 4-kinase alpha 1 OS=Arabidopsis thaliana GN=PI4KA1 PE=1 SV=2	GO:0004430(1-phosphatidylinositol 4-kinase activity);GO:0005546(phosphatidylinositol-4,5-bisphosphate binding);GO:0005737(cytoplasm);GO:0005886(plasma membrane);GO:0006468(protein phosphorylation);GO:0009506(plasmodesma);GO:0030036(actin cytoskeleton organization);GO:0032266(phosphatidylinositol-3-phosphate binding);GO:0043325(phosphatidylinositol-3,4-bisphosphate binding);GO:0046854(phosphatidyl…	COG5032(phosphatidylinositol kinase activity)	K00888	phosphatidylinositol 4-kinase A	EC:2.7.1.67	boe00562(Inositol phosphate metabolism);boe04070(Phosphatidylinositol signaling system)	S8CRX5.1 PF00454.25;PI3_PI4_kinase;
A05	BjuA019304	15202936	15203982	1047	G1/G3	hypothetical protein BRARA_E01707 [Brassica rapa]	-	-	GO:0003674(molecular_function);GO:0005634(nucleus);GO:0008150(biological_process)	ENOG4111RW0(NA)	K02115	F-type H+-transporting ATPase subunit gamma	-	vra00190(Oxidative phosphorylation);vra00195(Photosynthesis)	-
A05	BjuA019305	15211878	15213488	1524	G1/G3	RecName: Full=Retrovirus-related Pol polyprotein from transposon RE1; AltName: Full=Retro element 1; Short=AtRE1; Includes: RecName: Full=Protease RE1; Includes: RecName: Full=Reverse transcriptase RE1; Includes: RecName: Full=Endonuclease RE1	-	Retrovirus-related Pol polyprotein from transposon TNT 1-94 OS=Nicotiana tabacum PE=2 SV=1	GO:0005739(mitochondrion)	ENOG410ZK3M(NA)	K01528	dynamin GTPase	EC:3.6.5.5	lja04144(Endocytosis)	A0A087GVB2.1 PF07727.12;RVT_2;
A05	BjuA019306	15249725	15252002	675	G1/G3	PREDICTED: uncharacterized protein LOC103868744 [Brassica rapa]	-	-	GO:0003674(molecular_function);GO:0005634(nucleus);GO:0008150(biological_process)	ENOG4111B40(NA)	-	-	-	-	-
A05	BjuA019307	15262432	15262902	471	G1/G3	PREDICTED: uncharacterized protein LOC106292245 [Brassica oleracea var. oleracea]	-	-	-	-	NA	NA	NA	NA(NA)	A0A0D3DLD3.1 PF14111.4;DUF4283;
A05	BjuA019308	15273629	15274111	483	G1/G3	PREDICTED: uncharacterized protein LOC103868657 [Brassica rapa]	-	-	GO:0005737(cytoplasm);GO:0016301(kinase activity);GO:0016310(phosphorylation);GO:0016773(phosphotransferase activity, alcohol group as acceptor)	COG2313(hydrolase activity, acting on glycosyl bonds)	NA	NA	NA	NA(NA)	M4ETZ5.1 PF00294.22;PfkB;
A05	BjuA019309	15290622	15292520	1518	G1/G3	PREDICTED: putative two-component response regulator ARR19 [Brassica rapa]	ARR19	Putative two-component response regulator ARR19 OS=Arabidopsis thaliana GN=ARR19 PE=2 SV=2	GO:0000156(phosphorelay response regulator activity);GO:0000160(phosphorelay signal transduction system);GO:0003677(DNA binding);GO:0003700(DNA binding transcription factor activity);GO:0005515(protein binding);GO:0005634(nucleus);GO:0006351(transcription, DNA-templated);GO:0006355(regulation of transcription, DNA-templated);GO:0009736(cytokinin-activated signaling pathway);GO:0042802(identical p…	COG5641(Transcription factor)	K14491	two-component response regulator ARR-B family	-	brp04075(Plant hormone signal transduction)	A0A078EQV0.1 PF00072.22;Response_reg;
A05	BjuA019314	15381099	15385952	519	G1/G3	unnamed protein product [Brassica rapa]	PCR6	Protein PLANT CADMIUM RESISTANCE 6 OS=Arabidopsis thaliana GN=PCR6 PE=2 SV=1	GO:0003674(molecular_function);GO:0005886(plasma membrane);GO:0008150(biological_process);GO:0016021(integral component of membrane)	-	-	-	-	-	M4ETY9.1 PF04749.15;PLAC8;
A05	BjuA019315	15389948	15393007	1884	G1/G3	BnaA05g36410D [Brassica napus]	At1g48930	Endoglucanase 5 OS=Arabidopsis thaliana GN=At1g48930 PE=2 SV=1	GO:0004553(hydrolase activity, hydrolyzing O-glycosyl compounds);GO:0005576(extracellular region);GO:0008810(cellulase activity);GO:0030245(cellulose catabolic process);GO:0030246(carbohydrate binding);GO:0071555(cell wall organization)	ENOG410XPC9(hydrolase family)	K01179	endoglucanase	EC:3.2.1.4	bvg00500(Starch and sucrose metabolism)	A0A0D3CFR2.1 PF00759.17;Glyco_hydro_9;
A05	BjuA019316	15393353	15395862	1200	G1/G3	PREDICTED: nucleolin 1-like [Brassica rapa]	NUCL1	Nucleolin 1 OS=Arabidopsis thaliana GN=NUCL1 PE=1 SV=1	GO:0000478(endonucleolytic cleavage involved in rRNA processing);GO:0003676(nucleic acid binding);GO:0003677(DNA binding);GO:0003729(mRNA binding);GO:0005730(nucleolus);GO:0005739(mitochondrion);GO:0005829(cytosol);GO:0006364(rRNA processing);GO:0010305(leaf vascular tissue pattern formation);GO:0010588(cotyledon vascular tissue pattern formation);GO:0042254(ribosome biogenesis);GO:0048364(root d…	COG0724(Rna-binding protein)	NA	NA	NA	NA(NA)	M4ETY7.1 PF00076.20;RRM_1;
A05	BjuA019317	15398235	15398543	309	G1/G3	unnamed protein product [Brassica rapa]	SRP-54C	Signal recognition particle 54 kDa protein 3 OS=Arabidopsis thaliana GN=SRP-54C PE=2 SV=2	GO:0003729(mRNA binding);GO:0003924(GTPase activity);GO:0005525(GTP binding);GO:0005737(cytoplasm);GO:0005786(signal recognition particle, endoplasmic reticulum targeting);GO:0005829(cytosol);GO:0006614(SRP-dependent cotranslational protein targeting to membrane);GO:0006617(SRP-dependent cotranslational protein targeting to membrane, signal sequence recognition);GO:0008312(7S RNA binding)	COG0541(Involved in targeting and insertion of nascent membrane proteins into the cytoplasmic membrane. Binds to the hydrophobic signal sequence of the ribosome-nascent chain (RNC) as it emerges from the ribosomes. The SRP-RNC complex is then targeted to the cytoplasmic membrane where it interacts with the SRP receptor FtsY)	K03106	signal recognition particle subunit SRP54	EC:3.6.5.4	brp03060(Protein export)	A0A078EUR2.1 PF02978.17;SRP_SPB;
A05	BjuA019318	15405561	15408191	1317	G1/G3	PREDICTED: chorismate synthase, chloroplastic-like [Brassica rapa]	EMB1144	Chorismate synthase, chloroplastic OS=Arabidopsis thaliana GN=EMB1144 PE=2 SV=2	GO:0004107(chorismate synthase activity);GO:0005730(nucleolus);GO:0005829(cytosol);GO:0009073(aromatic amino acid family biosynthetic process);GO:0009423(chorismate biosynthetic process);GO:0009507(chloroplast);GO:0009536(plastid);GO:0009570(chloroplast stroma);GO:0009793(embryo development ending in seed dormancy);GO:0010181(FMN binding)	COG0082(5-enolpyruvylshikimate-3-phosphate phospholyase)	K01736	chorismate synthase	EC:4.2.3.5	brp00400(Phenylalanine, tyrosine and tryptophan biosynthesis)	A0A078ESW1.1 PF01264.19;Chorismate_synt;
A05	BjuA019319	15408385	15411174	2106	G1/G3	BnaA05g36380D [Brassica napus]	-	-	GO:0003674(molecular_function);GO:0008150(biological_process);GO:0016021(integral component of membrane)	ENOG410XRI5(Plant protein of unknown function (DUF639))	-	-	-	-	A0A078J6A7.1 PF04842.10;DUF639;
A05	BjuA019320	15420283	15422832	2550	G1/G3	PREDICTED: AP-3 complex subunit delta [Brassica rapa]	DELTA-ADR	AP-3 complex subunit delta OS=Arabidopsis thaliana GN=DELTA-ADR PE=1 SV=1	GO:0000139(Golgi membrane);GO:0005515(protein binding);GO:0005634(nucleus);GO:0005794(Golgi apparatus);GO:0006886(intracellular protein transport);GO:0006903(vesicle targeting);GO:0007032(endosome organization);GO:0030123(AP-3 adaptor complex);GO:0030276(clathrin binding);GO:0080171(lytic vacuole organization);GO:1990019(protein storage vacuole organization)	ENOG410XQFB(Adaptor-related protein complex 3, delta 1 subunit)	NA	NA	NA	NA(NA)	A0A078JLH5.1 PF01602.18;Adaptin_N;
A05	BjuA019321	15425313	15425603	291	G1/G3	PREDICTED: non-specific lipid-transfer protein 2 [Brassica rapa]	-	Non-specific lipid-transfer protein 2 OS=Prunus armeniaca PE=1 SV=1	GO:0005576(extracellular region);GO:0006869(lipid transport);GO:0008289(lipid binding)	ENOG410YV7D(nonspecific lipid-transfer protein)	-	-	-	-	A0A078JSF8.1 PF14368.4;LTP_2;
A05	BjuA019322	15448411	15448629	219	G1/G3	BnaA05g36450D [Brassica napus]	-	-	-	-	-	-	-	-	-
A05	BjuA019323	15449135	15450450	1041	G1/G3	PREDICTED: receptor for activated C kinase 1B [Brassica rapa]	RACK1B	Receptor for activated C kinase 1B OS=Arabidopsis thaliana GN=RACK1B PE=1 SV=1	GO:0000166(nucleotide binding);GO:0005078(MAP-kinase scaffold activity);GO:0005080(protein kinase C binding);GO:0005634(nucleus);GO:0005737(cytoplasm);GO:0005829(cytosol);GO:0006417(regulation of translation);GO:0007165(signal transduction);GO:0009845(seed germination);GO:0009967(positive regulation of signal transduction);GO:0022626(cytosolic ribosome);GO:0042254(ribosome biogenesis);GO:0048364(…	ENOG410XQGZ(guanine nucleotidebinding protein)	NA	NA	NA	NA(NA)	M0RXA8.1 PF00400.30;WD40;
A05	BjuA019324	15450943	15458376	753	G1/G3	hypothetical protein BRARA_E01912, partial [Brassica rapa]	At1g48640	Lysine histidine transporter-like 1 OS=Arabidopsis thaliana GN=At1g48640 PE=3 SV=2	GO:0005886(plasma membrane);GO:0006865(amino acid transport);GO:0015171(amino acid transmembrane transporter activity);GO:0016020(membrane);GO:0016021(integral component of membrane)	COG0814(amino acid transport)	NA	NA	NA	NA(NA)	A0A078J8H0.1 PF01490.16;Aa_trans;
A05	BjuA019325	15474010	15475315	555	G1/G3	BnaA05g36480D [Brassica napus]	-	-	-	ENOG410Z72C(linker histone H1 and H5 family)	K01598	phosphopantothenoylcysteine decarboxylase	EC:4.1.1.36	aly00770(Pantothenate and CoA biosynthesis)	-
A05	BjuA019326	15477065	15477508	381	G1/G3	-	-	-	-	-	-	-	-	-	-
A05	BjuA019327	15487365	15488097	510	G1/G3	unnamed protein product [Brassica rapa]	GLN1-5	Glutamine synthetase cytosolic isozyme 1-5 OS=Arabidopsis thaliana GN=GLN1-5 PE=1 SV=1	GO:0004356(glutamate-ammonia ligase activity);GO:0005524(ATP binding);GO:0005737(cytoplasm);GO:0006542(glutamine biosynthetic process);GO:0009399(nitrogen fixation);GO:0009506(plasmodesma);GO:0009507(chloroplast);GO:0016021(integral component of membrane)	COG0174(glutamine synthetase)	K01915	glutamine synthetase	EC:6.3.1.2	brp00630(Glyoxylate and dicarboxylate metabolism);brp00910(Nitrogen metabolism);brp00250(Alanine, aspartate and glutamate metabolism);brp00220(Arginine biosynthesis)	A0A0D3CP70.1 PF00120.22;Gln-synt_C;
A05	BjuA019328	15492869	15493447	579	G1/G3	PREDICTED: uncharacterized protein At2g29880-like [Brassica rapa]	At2g29880	Uncharacterized protein At2g29880 OS=Arabidopsis thaliana GN=At2g29880 PE=2 SV=1	GO:0003674(molecular_function);GO:0005634(nucleus);GO:0008150(biological_process)	ENOG411206Y(transposon protein)	-	-	-	-	-
A05	BjuA019694	19970210	19970533	324	G1/G3	PREDICTED: uncharacterized protein LOC103869029 [Brassica rapa]	-	-	GO:0003674(molecular_function);GO:0008150(biological_process)	ENOG410YP5Y(Protein of unknown function (DUF1677))	-	-	-	-	V4LUW4.1 PF07911.11;DUF1677;
A05	BjuA019695	19980277	19980636	360	G1/G3	PREDICTED: uncharacterized protein LOC108871970 [Brassica rapa]	-	-	-	-	-	-	-	-	-
A05	BjuA019696	19980673	19986197	678	G1/G3	PREDICTED: uncharacterized protein LOC103869031 [Brassica rapa]	-	-	GO:0003674(molecular_function);GO:0005774(vacuolar membrane);GO:0008150(biological_process)	ENOG41128RQ(NA)	-	-	-	-	-
A05	BjuA019697	19987077	19990405	1809	G1/G2，G1/G3	BnaA05g17120D [Brassica napus]	-	-	GO:0005634(nucleus);GO:0008150(biological_process);GO:0009507(chloroplast);GO:0009570(chloroplast stroma);GO:0009941(chloroplast envelope)	ENOG411141Y(NA)	-	-	-	-	-
A05	BjuA019698	19994129	19994395	267	G1/G2，G1/G3	hypothetical protein BRARA_E01997 [Brassica rapa]	-	-	GO:0003677(DNA binding);GO:0003700(DNA binding transcription factor activity);GO:0005634(nucleus)	COG5147(Myblike DNAbinding domain containing protein)	NA	NA	NA	NA(NA)	-
A05	BjuA019699	20000289	20000833	381	G1/G2，G1/G3	BnaA05g17140D [Brassica napus]	-	-	GO:0003674(molecular_function);GO:0005634(nucleus)	ENOG41123VE(TSR2, 20S rRNA accumulation, homolog (S. cerevisiae))	NA	NA	NA	NA(NA)	A0A078HLR7.1 PF10273.7;WGG;
A05	BjuA019700	20001467	20002417	786	G1/G2，G1/G3	hypothetical protein BRARA_E01999 [Brassica rapa]	RAB28	Late embryogenesis abundant protein 31 OS=Arabidopsis thaliana GN=RAB28 PE=1 SV=1	GO:0003674(molecular_function);GO:0005634(nucleus);GO:0005730(nucleolus);GO:0005737(cytoplasm);GO:0005829(cytosol);GO:0006873(cellular ion homeostasis);GO:0006970(response to osmotic stress);GO:0009414(response to water deprivation);GO:0009737(response to abscisic acid);GO:0009793(embryo development ending in seed dormancy);GO:0009845(seed germination);GO:0010226(response to lithium ion)	ENOG4111RXD(late embryogenesis abundant protein)	NA	NA	NA	NA(NA)	M4FFT2.1 PF04927.10;SMP;
A05	BjuA019701	20002684	20003124	441	G1/G2，G1/G3	BnaA05g17160D [Brassica napus]	At3g22480	Probable prefoldin subunit 2 OS=Arabidopsis thaliana GN=At3g22480 PE=2 SV=1	GO:0005737(cytoplasm);GO:0006457(protein folding);GO:0016272(prefoldin complex);GO:0044183(protein binding involved in protein folding);GO:0051082(unfolded protein binding)	ENOG4111S6I(prefoldin subunit 2)	NA	NA	NA	NA(NA)	M4FFT1.1 PF01920.18;Prefoldin_2;
A05	BjuA019702	20018154	20019710	906	G1/G2，G1/G3	unnamed protein product [Brassica rapa]	FRL4A	FRIGIDA-like protein 4a OS=Arabidopsis thaliana GN=FRL4A PE=2 SV=1	GO:0003674(molecular_function);GO:0005634(nucleus);GO:0009908(flower development);GO:0030154(cell differentiation)	ENOG410YC7X(Frigida-like protein)	NA	NA	NA	NA(NA)	A0A078HNB7.1 PF07899.9;Frigida;
A05	BjuA019703	20023849	20027527	1686	G1/G2，G1/G3	hypothetical protein BRARA_E02003 [Brassica rapa]	-	-	GO:0004526(ribonuclease P activity);GO:0005655(nucleolar ribonuclease P complex);GO:0090502(RNA phosphodiester bond hydrolysis, endonucleolytic)	ENOG410Y99Z(XS domain)	-	-	-	-	A0A078F863.1 PF03468.12;XS;
A05	BjuA019704	20031191	20032848	807	G1/G2，G1/G3	hypothetical protein BRARA_E02004 [Brassica rapa]	HISN5B	Imidazoleglycerol-phosphate dehydratase 2, chloroplastic OS=Arabidopsis thaliana GN=HISN5B PE=1 SV=2	GO:0000105(histidine biosynthetic process);GO:0004424(imidazoleglycerol-phosphate dehydratase activity);GO:0009507(chloroplast)	COG0131(imidazoleglycerolphosphate dehydratase)	K01693	imidazoleglycerol-phosphate dehydratase	EC:4.2.1.19	brp00340(Histidine metabolism)	A0A078HKX5.1 PF00475.16;IGPD;
A05	BjuA019705	20036404	20038938	1809	G1/G2，G1/G3	PREDICTED: serine/threonine-protein kinase WNK2 [Brassica rapa]	WNK2	Serine/threonine-protein kinase WNK2 OS=Arabidopsis thaliana GN=WNK2 PE=1 SV=1	GO:0004674(protein serine/threonine kinase activity);GO:0005829(cytosol);GO:0006468(protein phosphorylation);GO:0035556(intracellular signal transduction)	ENOG410XQWZ(WNK lysine deficient protein kinase)	NA	NA	NA	NA(NA)	A0A078HLT9.1 PF00069.23;Pkinase;
A05	BjuA019706	20041856	20042065	210	G1/G2，G1/G3	BnaA05g17220D [Brassica napus]	-	-	-	-	-	-	-	-	-
A05	BjuA019707	20045914	20046577	303	G1/G2，G1/G3	PREDICTED: zinc finger BED domain-containing protein RICESLEEPER 2-like [Brassica rapa]	-	-	-	-	-	-	-	-	-
A05	BjuA019708	20070880	20073639	1203	G1/G2，G1/G3	PREDICTED: phosphatidylinositol/phosphatidylcholine transfer protein SFH4 [Brassica rapa]	-	-	GO:0003674(molecular_function);GO:0005739(mitochondrion);GO:0008150(biological_process)	ENOG410Y3Q0(CRAL TRIO domain protein)	-	-	-	-	M4FFS5.1 PF00650.18;CRAL_TRIO;
A05	BjuA042753	19335363	19336598	1236	G1/G3	PREDICTED: pentatricopeptide repeat-containing protein At1g31790 [Brassica rapa]	PCMP-A1	Pentatricopeptide repeat-containing protein At1g31790 OS=Arabidopsis thaliana GN=PCMP-A1 PE=2 SV=1	GO:0008150(biological_process);GO:0009507(chloroplast)	ENOG410Z7Z7(Pentatricopeptide repeat-containing protein)	NA	NA	NA	NA(NA)	V4SSD3.1 PF13812.4;PPR_3;
A05	BjuA042754	19334431	19334875	264	G1/G3	unnamed protein product, partial [Brassica rapa]	-	Acyl-CoA-binding protein OS=Brassica napus PE=3 SV=1	GO:0000062(fatty-acyl-CoA binding);GO:0001666(response to hypoxia);GO:0005737(cytoplasm);GO:0005829(cytosol);GO:0005886(plasma membrane);GO:0006869(lipid transport);GO:0009409(response to cold);GO:0009646(response to absence of light);GO:0031210(phosphatidylcholine binding);GO:0050826(response to freezing)	COG4281(Acyl-CoA binding domain containing)	-	-	-	-	A0A0D2ZSX4.1 PF00887.17;ACBP;
A05	BjuA042755	19306509	19309185	1815	G1/G3	hypothetical protein BRARA_E01946 [Brassica rapa]	At1g31850	Probable methyltransferase PMT20 OS=Arabidopsis thaliana GN=At1g31850 PE=2 SV=1	GO:0000139(Golgi membrane);GO:0005768(endosome);GO:0005794(Golgi apparatus);GO:0005802(trans-Golgi network);GO:0008757(S-adenosylmethionine-dependent methyltransferase activity);GO:0016021(integral component of membrane);GO:0032259(methylation)	ENOG4111CGI(Methyltransferase)	NA	NA	NA	NA(NA)	A0A0D3CGX4.1 PF03141.14;Methyltransf_29;
A05	BjuA042756	19302417	19304455	693	G1/G3	uncharacterized protein LOC112082048 [Eutrema salsugineum]	-	-	GO:0003735(structural constituent of ribosome);GO:0006412(translation);GO:0022625(cytosolic large ribosomal subunit)	ENOG410ZKCR(Pfam:RnaseH)	-	-	-	-	-
A05	BjuA042757	19299800	19301502	747	G1/G3	PREDICTED: histidine biosynthesis bifunctional protein hisIE, chloroplastic-like [Brassica rapa]	HISN2	Histidine biosynthesis bifunctional protein hisIE, chloroplastic OS=Arabidopsis thaliana GN=HISN2 PE=1 SV=1	GO:0000105(histidine biosynthetic process);GO:0004635(phosphoribosyl-AMP cyclohydrolase activity);GO:0004636(phosphoribosyl-ATP diphosphatase activity);GO:0005524(ATP binding);GO:0009507(chloroplast);GO:0009570(chloroplast stroma)	COG0139(Phosphoribosyl-amp cyclohydrolase)	K11755	phosphoribosyl-ATP pyrophosphohydrolase / phosphoribosyl-AMP cyclohydrolase	EC:3.6.1.31 3.5.4.19	brp00340(Histidine metabolism)	A0A078FGZ3.1 PF01503.15;PRA-PH;
A05	BjuA042758	19296792	19299104	1617	G1/G3	hypothetical protein BRARA_E01944 [Brassica rapa]	BUD13	BUD13 homolog OS=Homo sapiens GN=BUD13 PE=1 SV=1	GO:0003674(molecular_function);GO:0005634(nucleus);GO:0005829(cytosol);GO:0008150(biological_process)	ENOG410XSEZ(BUD13 homolog (S. cerevisiae))	NA	NA	NA	NA(NA)	A0A0D3CGW9.1 PF09736.7;Bud13;
A05	BjuA042759	19293092	19293364	273	G1/G3	-	-	-	-	-	-	-	-	-	-
A05	BjuA042760	19284866	19286841	1032	G1/G3	PREDICTED: protein BREVIS RADIX-like [Brassica rapa]	BRX	Protein BREVIS RADIX OS=Arabidopsis thaliana GN=BRX PE=1 SV=2	GO:0005634(nucleus);GO:0005886(plasma membrane);GO:0009734(auxin-activated signaling pathway);GO:0009736(cytokinin-activated signaling pathway);GO:0009737(response to abscisic acid);GO:0015250(water channel activity);GO:0042802(identical protein binding);GO:0048364(root development);GO:0048527(lateral root development)	ENOG410YFJP(protein BREVIS RADIX-like)	-	-	-	-	A0A0D3CDI8.1 PF08381.9;BRX;
A05	BjuA042761	19276748	19276960	213	G1/G3	unnamed protein product [Brassica oleracea]	-	-	-	-	-	-	-	-	-
A05	BjuA042762	19272478	19274069	969	G1/G3	PREDICTED: aquaporin NIP3-1-like isoform X1 [Brassica rapa]	NIP3-1	Aquaporin NIP3-1 OS=Arabidopsis thaliana GN=NIP3-1 PE=2 SV=2	GO:0005887(integral component of plasma membrane);GO:0006810(transport);GO:0015250(water channel activity);GO:0015267(channel activity);GO:0016020(membrane);GO:0016021(integral component of membrane);GO:0034220(ion transmembrane transport);GO:0055085(transmembrane transport)	COG0580(Channel that permits osmotically driven movement of water in both directions. It is involved in the osmoregulation and in the maintenance of cell turgor during volume expansion in rapidly growing cells. It mediates rapid entry or exit of water in response to abrupt changes in osmolarity (By similarity))	NA	NA	NA	NA(NA)	M4EYH5.1 PF00230.18;MIP;
A05	BjuA042763	19231618	19233438	1731	G1/G3	PREDICTED: pentatricopeptide repeat-containing protein At1g31920 [Brassica rapa]	PCMP-H11	Pentatricopeptide repeat-containing protein At1g31920 OS=Arabidopsis thaliana GN=PCMP-H11 PE=2 SV=1	GO:0005739(mitochondrion);GO:0008150(biological_process);GO:0008270(zinc ion binding);GO:0043231(intracellular membrane-bounded organelle)	ENOG410Z7Z7(Pentatricopeptide repeat-containing protein)	K10683	BRCA1-associated RING domain protein 1	-	cic03440(Homologous recombination)	V4KUC4.1 PF14432.4;DYW_deaminase;
A05	BjuA042764	19230347	19230973	627	G1/G3	unnamed protein product [Brassica rapa]	-	-	-	ENOG410Y65V(Retrotransposon protein)	-	-	-	-	A0A078JMD2.1 PF13456.4;RVT_3;
A05	BjuA042765	19222840	19223088	249	G1/G3	unnamed protein product [Brassica rapa]	-	-	-	ENOG411086G(NA)	-	-	-	-	-
A05	BjuA042766	19221767	19222226	387	G1/G3	PREDICTED: uncharacterized protein LOC108857148 [Raphanus sativus]	-	-	GO:0005634(nucleus);GO:0005886(plasma membrane);GO:0016021(integral component of membrane)	ENOG410Y8EK(NA)	-	-	-	-	-
A05	BjuA042767	19216752	19218555	897	G1/G3	hypothetical protein AALP_AA1G325100 [Arabis alpina]	RH5	DEAD-box ATP-dependent RNA helicase 5 OS=Arabidopsis thaliana GN=RH5 PE=1 SV=1	GO:0003723(RNA binding);GO:0004004(ATP-dependent RNA helicase activity);GO:0005524(ATP binding);GO:0005634(nucleus);GO:0005730(nucleolus);GO:0005829(cytosol);GO:0006364(rRNA processing);GO:0008026(ATP-dependent helicase activity);GO:0010501(RNA secondary structure unwinding)	COG0513(purine NTP-dependent helicase activity)	NA	NA	NA	NA(NA)	A0A087HS52.1 PF00271.29;Helicase_C;
A05	BjuA042768	19215417	19215887	471	G1/G3	hypothetical protein DY000_00026576 [Brassica cretica]	-	-	GO:0003674(molecular_function);GO:0005739(mitochondrion);GO:0008150(biological_process);GO:0016021(integral component of membrane)	-	-	-	-	-	-
A05	BjuA042769	19184955	19185407	453	G1/G3	hypothetical protein DY000_00029388 [Brassica cretica]	-	-	GO:0003674(molecular_function);GO:0005739(mitochondrion);GO:0008150(biological_process);GO:0016021(integral component of membrane)	-	-	-	-	-	-
A05	BjuA042819	4958650	4958922	273	G1/G3	-	-	-	-	-	-	-	-	-	-
A05	BjuA043001	1094510	1095843	750	G1/G2，G1/G3	unnamed protein product [Brassica rapa]	BHLH106	Transcription factor bHLH106 OS=Arabidopsis thaliana GN=BHLH106 PE=2 SV=1	GO:0003677(DNA binding);GO:0003700(DNA binding transcription factor activity);GO:0005634(nucleus);GO:0006351(transcription, DNA-templated);GO:0006355(regulation of transcription, DNA-templated);GO:0009941(chloroplast envelope);GO:0042538(hyperosmotic salinity response);GO:0046983(protein dimerization activity)	ENOG410XRJI(aryl hydrocarbon receptor nuclear)	-	-	-	-	A0A078CT65.1 PF00010.24;HLH;
A05	BjuA043002	1091470	1093422	1953	G1/G2，G1/G3	pentatricopeptide repeat-containing protein At2g41080-like [Brassica napus]	PCMP-H29	Pentatricopeptide repeat-containing protein At2g41080 OS=Arabidopsis thaliana GN=PCMP-H29 PE=2 SV=2	GO:0003723(RNA binding);GO:0005739(mitochondrion);GO:0008150(biological_process);GO:0008270(zinc ion binding)	ENOG410Z7Z7(Pentatricopeptide repeat-containing protein)	K10683	BRCA1-associated RING domain protein 1	-	cic03440(Homologous recombination)	A0A078CXV9.1 PF14432.4;DYW_deaminase;
A05	BjuA043003	1088794	1089823	843	G1/G2，G1/G3	PREDICTED: ABSCISIC ACID-INSENSITIVE 5-like protein 3 [Brassica rapa]	DPBF4	ABSCISIC ACID-INSENSITIVE 5-like protein 3 OS=Arabidopsis thaliana GN=DPBF4 PE=1 SV=1	GO:0003677(DNA binding);GO:0003700(DNA binding transcription factor activity);GO:0005634(nucleus);GO:0006351(transcription, DNA-templated);GO:0006355(regulation of transcription, DNA-templated);GO:0009738(abscisic acid-activated signaling pathway);GO:0043565(sequence-specific DNA binding)	ENOG41106MZ(enhanced em level)	K14432	ABA responsive element binding factor	-	brp04075(Plant hormone signal transduction)	V4MCB1.1 PF00170.19;bZIP_1;
A05	BjuA043004	1081626	1084747	1281	G1/G2，G1/G3	PREDICTED: uncharacterized protein LOC103866528 [Brassica rapa]	RTC2	Probable vacuolar amino acid transporter YPQ3 OS=Saccharomyces cerevisiae (strain ATCC 204508 / S288c) GN=RTC2 PE=1 SV=1	GO:0003674(molecular_function);GO:0008150(biological_process);GO:0016020(membrane);GO:0016021(integral component of membrane)	ENOG4111FM2(PQ loop repeat)	-	-	-	-	M4CK62.1 PF04193.12;PQ-loop;
A05	BjuA043005	1076418	1078652	2235	G1/G2，G1/G3	uncharacterized protein LOC106450683 [Brassica napus]	-	-	GO:0005634(nucleus);GO:0005886(plasma membrane);GO:0016301(kinase activity);GO:0016310(phosphorylation)	ENOG41103UF(NA)	-	-	-	-	-
A05	BjuA045984	18692510	18694502	546	G1/G3	hypothetical protein BRARA_E01808 [Brassica rapa]	-	-	-	-	-	-	-	-	-
A05	BjuA045985	18694512	18694874	363	G1/G3	-	-	-	-	-	-	-	-	-	-
A05	BjuA045986	18700441	18701451	519	G1/G3	PREDICTED: LOB domain-containing protein 4 [Raphanus sativus]	LBD4	LOB domain-containing protein 4 OS=Arabidopsis thaliana GN=LBD4 PE=2 SV=1	GO:0005515(protein binding);GO:0005634(nucleus);GO:0008150(biological_process)	ENOG410YHFG(lob domain-containing protein)	NA	NA	NA	NA(NA)	M1AGH3.1 PF03195.12;DUF260;
A05	BjuA045987	18711361	18712635	471	G1/G3	related to ubiquitin 1 [Arabidopsis thaliana]	RUB1	Ubiquitin-NEDD8-like protein RUB1 OS=Arabidopsis thaliana GN=RUB1 PE=1 SV=3	GO:0005829(cytosol);GO:0005886(plasma membrane);GO:0006464(cellular protein modification process);GO:0009693(ethylene biosynthetic process);GO:0009733(response to auxin);GO:0009793(embryo development ending in seed dormancy);GO:0019941(modification-dependent protein catabolic process);GO:0045116(protein neddylation)	COG5272(ubiquitin)	NA	NA	NA	NA(NA)	Q8RUC6.3 PF00240.21;ubiquitin;
A05	BjuA045988	18713347	18715382	1539	G1/G3	unnamed protein product [Brassica rapa]	potD-B	Spermidine/putrescine-binding periplasmic protein 1 OS=Haemophilus influenzae (strain ATCC 51907 / DSM 11121 / KW20 / Rd) GN=potD-B PE=3 SV=1	GO:0005634(nucleus);GO:0009941(chloroplast envelope);GO:0015846(polyamine transport);GO:0019808(polyamine binding);GO:0042597(periplasmic space)	COG0687(polyamine binding)	-	-	-	-	A0A087HS08.1 PF13343.4;SBP_bac_6;
A05	BjuA045989	18717319	18719879	1293	G1/G3	unnamed protein product [Brassica rapa]	BYSL	Bystin OS=Homo sapiens GN=BYSL PE=1 SV=3	GO:0003674(molecular_function);GO:0005634(nucleus);GO:0006364(rRNA processing);GO:0009553(embryo sac development);GO:0009555(pollen development)	ENOG410XPH5(K14797 essential nuclear protein 1)	NA	NA	NA	NA(NA)	M4DEJ0.1 PF05291.9;Bystin;
A05	BjuA045990	18721536	18721829	219	G1/G3	PREDICTED: ubiquitin carboxyl-terminal hydrolase 13-like [Brassica rapa]	-	-	-	-	-	-	-	-	-
A05	BjuA045991	18723720	18724711	348	G1/G3	PREDICTED: upstream activation factor subunit UAF30-like [Brassica rapa]	UAF30	Upstream activation factor subunit UAF30 OS=Saccharomyces cerevisiae (strain ATCC 204508 / S288c) GN=UAF30 PE=1 SV=1	GO:0003674(molecular_function);GO:0005634(nucleus);GO:0008150(biological_process)	COG5531(SWI SNF related, matrix associated, actin dependent regulator of chromatin, subfamily d, member)	NA	NA	NA	NA(NA)	A0A078IIQ8.1 PF02201.16;SWIB;
A05	BjuA045992	18736721	18739864	1038	G1/G3	PREDICTED: uncharacterized protein LOC106302445 [Brassica oleracea var. oleracea]	-	-	GO:0005634(nucleus);GO:0008150(biological_process)	ENOG410Y65V(Retrotransposon protein)	-	-	-	-	A0A078JC55.1 PF13966.4;zf-RVT;
A05	BjuA045993	18740264	18740719	456	G1/G3	hypothetical protein DY000_00002021 [Brassica cretica]	-	-	-	-	-	-	-	-	-
A05	BjuA045994	18740783	18741235	453	G1/G3	PREDICTED: uncharacterized protein LOC106302835 [Brassica oleracea var. oleracea]	-	-	GO:0003676(nucleic acid binding);GO:0005575(cellular_component);GO:0008150(biological_process);GO:0008270(zinc ion binding)	ENOG410Y65V(Retrotransposon protein)	-	-	-	-	V4LUL9.1 PF14111.4;DUF4283;
A05	BjuA045995	18787090	18793574	1791	G1/G3	unnamed protein product [Brassica rapa]	At1g74360	Probable LRR receptor-like serine/threonine-protein kinase At1g74360 OS=Arabidopsis thaliana GN=At1g74360 PE=1 SV=1	GO:0002215(defense response to nematode);GO:0004674(protein serine/threonine kinase activity);GO:0005524(ATP binding);GO:0005739(mitochondrion);GO:0005886(plasma membrane);GO:0006468(protein phosphorylation);GO:0007169(transmembrane receptor protein tyrosine kinase signaling pathway);GO:0009506(plasmodesma);GO:0016021(integral component of membrane);GO:0031966(mitochondrial membrane)	COG4886(leucine Rich Repeat)	-	-	-	-	A0A0J8CAV6.1 PF13855.4;LRR_8;
A05	BjuA045996	18803450	18808440	996	G1/G3	unnamed protein product [Brassica rapa]	-	-	-	COG0507(exodeoxyribonuclease v alpha)	K07466	replication factor A1	-	boe03030(DNA replication);boe03420(Nucleotide excision repair);boe03430(Mismatch repair);boe03440(Homologous recombination)	M4F7G3.1 PF08646.8;Rep_fac-A_C;
A06	BjuA000129	10382179	10388536	2679	G1/G2	PREDICTED: kinesin-like protein KIN-7C, mitochondrial [Brassica rapa]	KIN7C	Kinesin-like protein KIN-7C, mitochondrial OS=Arabidopsis thaliana GN=KIN7C PE=1 SV=1	GO:0003777(microtubule motor activity);GO:0005524(ATP binding);GO:0005739(mitochondrion);GO:0005871(kinesin complex);GO:0005874(microtubule);GO:0005886(plasma membrane);GO:0007018(microtubule-based movement);GO:0008017(microtubule binding);GO:0016887(ATPase activity)	COG5059(Kinesin family member)	NA	NA	NA	NA(NA)	Q8W5R6.1 PF00225.21;Kinesin;
A06	BjuA022140	6421179	6424125	1941	G1/G2	PREDICTED: transcription initiation factor TFIID subunit 12b [Brassica rapa]	TAF12B	Transcription initiation factor TFIID subunit 12b OS=Arabidopsis thaliana GN=TAF12B PE=1 SV=1	GO:0000124(SAGA complex);GO:0001102(RNA polymerase II activating transcription factor binding);GO:0003677(DNA binding);GO:0003743(translation initiation factor activity);GO:0004402(histone acetyltransferase activity);GO:0005515(protein binding);GO:0005634(nucleus);GO:0005669(transcription factor TFIID complex);GO:0006352(DNA-templated transcription, initiation);GO:0006355(regulation of transcript…	COG5624(TAF12 RNA polymerase II, TATA box binding protein (TBP)-associated factor)	K03126	transcription initiation factor TFIID subunit 12	-	brp03022(Basal transcription factors)	M4EB16.1 PF03847.11;TFIID_20kDa;
A06	BjuA022141	6429544	6429885	342	G1/G2	PREDICTED: protein ELF4-LIKE 4 [Brassica rapa]	EFL4	Protein ELF4-LIKE 4 OS=Arabidopsis thaliana GN=EFL4 PE=2 SV=1	GO:0003674(molecular_function);GO:0005634(nucleus);GO:0009648(photoperiodism);GO:0042753(positive regulation of circadian rhythm);GO:0048511(rhythmic process)	ENOG410Y56Z(early flowering)	-	-	-	-	Q570U6.1 PF07011.9;DUF1313;
A06	BjuA022142	6430940	6433814	2010	G1/G2	hypothetical protein BRARA_F01228 [Brassica rapa]	-	-	GO:0000783(nuclear telomere cap complex);GO:0003677(DNA binding);GO:0003691(double-stranded telomeric DNA binding);GO:0003700(DNA binding transcription factor activity);GO:0005634(nucleus);GO:0009651(response to salt stress);GO:0031627(telomeric loop formation);GO:0046686(response to cadmium ion)	ENOG41127KI(Transcription factor)	NA	NA	NA	NA(NA)	M4EB14.1 PF00249.29;Myb_DNA-binding;
A06	BjuA022143	6438005	6440604	1242	G1/G2	hypothetical protein BRARA_F01230 [Brassica rapa]	At4g39756	Putative F-box/kelch-repeat protein At4g39756 OS=Arabidopsis thaliana GN=At4g39756 PE=3 SV=1	GO:0003674(molecular_function);GO:0005634(nucleus);GO:0008150(biological_process)	ENOG4110X8D(Kelch repeat-containing F-box family protein)	K14411	RNA-binding protein Musashi	-	csv03015(mRNA surveillance pathway)	M4EB11.1 PF01344.23;Kelch_1;
A06	BjuA022144	6445161	6445619	246	G1/G2	hypothetical protein BRARA_F01231 [Brassica rapa]	-	-	GO:0003674(molecular_function);GO:0005634(nucleus);GO:0008150(biological_process)	ENOG4111DC5(NA)	-	-	-	-	-
A06	BjuA022145	6446059	6446545	375	G1/G2	hypothetical protein BRARA_F01232 [Brassica rapa]	-	-	GO:0003674(molecular_function);GO:0005739(mitochondrion);GO:0008150(biological_process)	ENOG41108EN(NA)	-	-	-	-	-
A06	BjuA022146	6447736	6449652	870	G1/G2	hypothetical protein BRARA_F01233 [Brassica rapa]	At1g17520	Telomere repeat-binding factor 4 OS=Arabidopsis thaliana GN=At1g17520 PE=2 SV=2	GO:0003677(DNA binding);GO:0003700(DNA binding transcription factor activity);GO:0005634(nucleus);GO:0009651(response to salt stress);GO:0009723(response to ethylene);GO:0009733(response to auxin);GO:0009751(response to salicylic acid);GO:0009753(response to jasmonic acid);GO:0043565(sequence-specific DNA binding);GO:0046686(response to cadmium ion)	ENOG410ZP2I(single myb histone)	NA	NA	NA	NA(NA)	A0A078IBP9.1 PF00538.17;Linker_histone;
A06	BjuA022147	6450087	6450638	552	G1/G2	hypothetical protein BRARA_F01234 [Brassica rapa]	TIM23-1	Mitochondrial import inner membrane translocase subunit TIM23-1 OS=Arabidopsis thaliana GN=TIM23-1 PE=2 SV=1	GO:0005743(mitochondrial inner membrane);GO:0005744(mitochondrial inner membrane presequence translocase complex);GO:0006626(protein targeting to mitochondrion);GO:0015031(protein transport);GO:0015450(P-P-bond-hydrolysis-driven protein transmembrane transporter activity);GO:0016021(integral component of membrane);GO:0030150(protein import into mitochondrial matrix);GO:0031305(integral component …	COG5596(mitochondrial import inner membrane translocase, subunit)	NA	NA	NA	NA(NA)	M4EB07.1 PF02466.17;Tim17;
A06	BjuA022148	6451629	6454450	2169	G1/G2	U-box domain-containing protein 35-like [Brassica napus]	PUB51	U-box domain-containing protein 51 OS=Arabidopsis thaliana GN=PUB51 PE=2 SV=2	GO:0004672(protein kinase activity);GO:0005524(ATP binding);GO:0005634(nucleus);GO:0006468(protein phosphorylation);GO:0006950(response to stress);GO:0016301(kinase activity);GO:0016787(hydrolase activity)	COG0515(Serine Threonine protein kinase)	NA	NA	NA	NA(NA)	M4EB06.1 PF00069.23;Pkinase;
A06	BjuA022149	6455586	6456332	747	G1/G2	hypothetical protein BRARA_F01236 [Brassica rapa]	HAB2	Protein phosphatase 2C 7 OS=Arabidopsis thaliana GN=HAB2 PE=1 SV=2	GO:0004722(protein serine/threonine phosphatase activity);GO:0005515(protein binding);GO:0006470(protein dephosphorylation);GO:0009738(abscisic acid-activated signaling pathway);GO:0046872(metal ion binding)	COG0631(Phosphatase)	K14497	protein phosphatase 2C	EC:3.1.3.16	brp04016(MAPK signaling pathway - plant);brp04075(Plant hormone signal transduction)	A0A0D3CB26.1 PF00481.19;PP2C;
A06	BjuA022150	6457254	6457607	354	G1/G2	hypothetical protein BRARA_F01236 [Brassica rapa]	HAB2	Protein phosphatase 2C 7 OS=Arabidopsis thaliana GN=HAB2 PE=1 SV=2	GO:0004722(protein serine/threonine phosphatase activity);GO:0005515(protein binding);GO:0006470(protein dephosphorylation);GO:0009738(abscisic acid-activated signaling pathway);GO:0046872(metal ion binding)	COG0631(Phosphatase)	K14497	protein phosphatase 2C	EC:3.1.3.16	bna04016(MAPK signaling pathway - plant);bna04075(Plant hormone signal transduction)	A0A0D3CB26.1 PF00481.19;PP2C;
A06	BjuA022151	6458284	6459277	594	G1/G2	50S ribosomal protein HLL, mitochondrial-like isoform X2 [Brassica napus]	HLP	50S ribosomal protein HLP, mitochondrial OS=Arabidopsis thaliana GN=HLP PE=2 SV=1	GO:0003735(structural constituent of ribosome);GO:0005739(mitochondrion);GO:0005840(ribosome);GO:0006412(translation);GO:0009507(chloroplast);GO:0070180(large ribosomal subunit rRNA binding)	COG0093(Binds to 23S rRNA. Forms part of two intersubunit bridges in the 70S ribosome (By similarity))	K02874	large subunit ribosomal protein L14	-	brp03010(Ribosome)	A0A0D3CB27.1 PF00238.17;Ribosomal_L14;
A06	BjuA022152	6463654	6464169	222	G1/G2	glutathione S-transferase T3-like isoform X1 [Brassica napus]	-	-	-	-	-	-	-	-	A0A0D3DP37.1 PF14303.4;NAM-associated;
A06	BjuA022153	6470131	6470766	636	G1/G2	TMV resistance protein N-like [Brassica napus]	CHS1	Disease resistance protein CHS1 OS=Arabidopsis thaliana GN=CHS1 PE=1 SV=1	GO:0005515(protein binding);GO:0006952(defense response);GO:0042742(defense response to bacterium);GO:0050832(defense response to fungus)	ENOG41104MF(TIR)	NA	NA	NA	NA(NA)	A0A087HP90.1 PF00931.20;NB-ARC;
A06	BjuA022154	6474867	6475637	771	G1/G2	NDR1/HIN1-like protein 13 [Brassica napus]	-	-	GO:0003674(molecular_function);GO:0005886(plasma membrane);GO:0008150(biological_process);GO:0009506(plasmodesma);GO:0016021(integral component of membrane)	ENOG410YGGV(Late embryogenesis abundant protein)	-	-	-	-	M4EB02.1 PF03168.11;LEA_2;
A06	BjuA022155	6482541	6484745	2205	G1/G2	hypothetical protein BRARA_F01240 [Brassica rapa]	PCMP-E72	Putative pentatricopeptide repeat-containing protein At1g17630 OS=Arabidopsis thaliana GN=PCMP-E72 PE=3 SV=1	GO:0003723(RNA binding);GO:0004519(endonuclease activity);GO:0005739(mitochondrion);GO:0009451(RNA modification);GO:0031930(mitochondria-nucleus signaling pathway);GO:0043231(intracellular membrane-bounded organelle)	ENOG410Z7Z7(Pentatricopeptide repeat-containing protein)	NA	NA	NA	NA(NA)	A0A0E0RBT0.1 PF17177.2;PPR_long;
A06	BjuA022156	6485360	6486950	1107	G1/G2	hypothetical protein BRARA_F01241 [Brassica rapa]	RNP1	Heterogeneous nuclear ribonucleoprotein 1 OS=Arabidopsis thaliana GN=RNP1 PE=1 SV=1	GO:0003723(RNA binding);GO:0005737(cytoplasm);GO:0008150(biological_process)	COG0724(Rna-binding protein)	K12741	heterogeneous nuclear ribonucleoprotein A1/A3	-	brp03040(Spliceosome)	A0A0D3CB31.1 PF00076.20;RRM_1;
A06	BjuA022157	6487405	6492139	1857	G1/G2	unnamed protein product, partial [Brassica rapa]	GLYR2	Glyoxylate/succinic semialdehyde reductase 2, chloroplastic OS=Arabidopsis thaliana GN=GLYR2 PE=1 SV=1	GO:0004616(phosphogluconate dehydrogenase (decarboxylating) activity);GO:0005739(mitochondrion);GO:0009507(chloroplast);GO:0009570(chloroplast stroma);GO:0016616(oxidoreductase activity, acting on the CH-OH group of donors, NAD or NADP as acceptor);GO:0030267(glyoxylate reductase (NADP) activity)	COG2084(Dehydrogenase)	K18121	glyoxylate/succinic semialdehyde reductase	EC:1.1.1.79 1.1.1.-	bna00630(Glyoxylate and dicarboxylate metabolism);bna00650(Butanoate metabolism)	A0A078IG19.1 PF03446.13;NAD_binding_2;
A06	BjuA022158	6501157	6506946	2712	G1/G2	PREDICTED: general transcription factor 3C polypeptide 3 [Brassica rapa]	sfc4	Transcription factor tau subunit sfc4 OS=Schizosaccharomyces pombe (strain 972 / ATCC 24843) GN=sfc4 PE=1 SV=1	GO:0005634(nucleus)	ENOG410XNW8(General transcription factor IIIC, polypeptide 3, 102kDa)	NA	NA	NA	NA(NA)	M4EAZ6.1 PF14559.4;TPR_19;
A06	BjuA022159	6509995	6510546	552	G1/G2	PREDICTED: PRA1 family protein F1 [Brassica rapa]	PRA1F1	PRA1 family protein F1 OS=Arabidopsis thaliana GN=PRA1F1 PE=1 SV=1	GO:0003674(molecular_function);GO:0005739(mitochondrion);GO:0005783(endoplasmic reticulum);GO:0010008(endosome membrane);GO:0016021(integral component of membrane);GO:0016192(vesicle-mediated transport)	COG5130(Prenylated RAB acceptor)	NA	NA	NA	NA(NA)	A0A078J7T1.1 PF03208.17;PRA1;
A06	BjuA022160	6513474	6514635	843	G1/G2	inorganic pyrophosphatase 2-like [Brassica napus]	At1g17710	Inorganic pyrophosphatase 2 OS=Arabidopsis thaliana GN=At1g17710 PE=2 SV=1	GO:0005634(nucleus);GO:0016311(dephosphorylation);GO:0046872(metal ion binding);GO:0052731(phosphocholine phosphatase activity);GO:0052732(phosphoethanolamine phosphatase activity)	ENOG4111NAQ(Phosphatase)	K13248	pyridoxal phosphate phosphatase PHOSPHO2	EC:3.1.3.74	bna00750(Vitamin B6 metabolism)	M4EAZ4.1 PF06888.10;Put_Phosphatase;
A06	BjuA022161	6516745	6520497	1446	G1/G2	PREDICTED: serine/threonine protein phosphatase 2A 55 kDa regulatory subunit B beta isoform-like isoform X2 [Brassica rapa]	PP2AB2	Serine/threonine protein phosphatase 2A 55 kDa regulatory subunit B beta isoform OS=Arabidopsis thaliana GN=PP2AB2 PE=1 SV=1	GO:0000159(protein phosphatase type 2A complex);GO:0000166(nucleotide binding);GO:0000278(mitotic cell cycle);GO:0004722(protein serine/threonine phosphatase activity);GO:0005515(protein binding);GO:0005737(cytoplasm);GO:0005829(cytosol);GO:0006470(protein dephosphorylation);GO:0019888(protein phosphatase regulator activity);GO:0032502(developmental process);GO:0050790(regulation of catalytic act…	COG5170(protein phosphatase type 2A regulator activity)	K04354	serine/threonine-protein phosphatase 2A regulatory subunit B	-	brp03015(mRNA surveillance pathway)	A0A0E0LCQ0.1 PF00400.30;WD40;
A06	BjuA022162	6567638	6568648	1011	G1/G2	PREDICTED: histone-lysine N-methyltransferase, H3 lysine-9 specific SUVH7-like [Raphanus sativus]	SUVH7	Histone-lysine N-methyltransferase, H3 lysine-9 specific SUVH7 OS=Arabidopsis thaliana GN=SUVH7 PE=2 SV=1	GO:0000775(chromosome, centromeric region);GO:0003677(DNA binding);GO:0005634(nucleus);GO:0008270(zinc ion binding);GO:0018024(histone-lysine N-methyltransferase activity);GO:0034968(histone lysine methylation)	COG2940(Histone-lysine N-methyltransferase);COG3440(ubiquitin-like with PHD and ring finger domains 2, E3 ubiquitin protein ligase)	K11420	euchromatic histone-lysine N-methyltransferase	EC:2.1.1.43	brp00310(Lysine degradation)	M4EAZ0.1 PF02182.15;SAD_SRA;
A06	BjuA022163	6592465	6594111	1386	G1/G2	BnaA06g12020D [Brassica napus]	GTE5	Transcription factor GTE5, chloroplastic OS=Arabidopsis thaliana GN=GTE5 PE=1 SV=1	GO:0003677(DNA binding);GO:0005515(protein binding);GO:0006351(transcription, DNA-templated);GO:0006355(regulation of transcription, DNA-templated);GO:0009507(chloroplast)	COG5076(bromodomain)	NA	NA	NA	NA(NA)	A0A078FXQ1.1 PF00439.23;Bromodomain;
A06	BjuA022164	6595044	6596200	804	G1/G2	PREDICTED: probable aquaporin TIP3-2 [Brassica rapa]	TIP3-2	Probable aquaporin TIP3-2 OS=Arabidopsis thaliana GN=TIP3-2 PE=2 SV=1	GO:0005737(cytoplasm);GO:0005887(integral component of plasma membrane);GO:0006810(transport);GO:0009705(plant-type vacuole membrane);GO:0015250(water channel activity);GO:0016020(membrane);GO:0034220(ion transmembrane transport);GO:0042807(central vacuole)	COG0580(Channel that permits osmotically driven movement of water in both directions. It is involved in the osmoregulation and in the maintenance of cell turgor during volume expansion in rapidly growing cells. It mediates rapid entry or exit of water in response to abrupt changes in osmolarity (By similarity))	NA	NA	NA	NA(NA)	V4L5K8.1 PF00230.18;MIP;
A06	BjuA022165	6596537	6599528	2337	G1/G2	unnamed protein product [Brassica rapa]	SPBC23G7.06c	Uncharacterized protein C23G7.06c OS=Schizosaccharomyces pombe (strain 972 / ATCC 24843) GN=SPBC23G7.06c PE=1 SV=3	GO:0007165(signal transduction);GO:0008289(lipid binding);GO:0035091(phosphatidylinositol binding)	ENOG410Z3SZ(Testis expressed 2)	-	-	-	-	A0A067LGJ3.1 PF10296.7;MMM1;
A06	BjuA022166	6600774	6602724	987	G1/G2	PREDICTED: uncharacterized protein LOC103872562 [Brassica rapa]	-	-	GO:0003674(molecular_function);GO:0005634(nucleus);GO:0008150(biological_process)	ENOG410YCMM(expressed protein)	NA	NA	NA	NA(NA)	A0A078GLZ7.1 PF05623.10;DUF789;
A06	BjuA022167	6605751	6608840	1905	G1/G2	unnamed protein product [Brassica rapa]	ABCG11	ABC transporter G family member 11 OS=Arabidopsis thaliana GN=ABCG11 PE=1 SV=1	GO:0005515(protein binding);GO:0005524(ATP binding);GO:0005886(plasma membrane);GO:0009611(response to wounding);GO:0009651(response to salt stress);GO:0009737(response to abscisic acid);GO:0009897(external side of plasma membrane);GO:0010222(stem vascular tissue pattern formation);GO:0010588(cotyledon vascular tissue pattern formation);GO:0015245(fatty acid transmembrane transporter activity);GO…	COG1131((ABC) transporter)	K05681	ATP-binding cassette, subfamily G (WHITE), member 2	-	smo02010(ABC transporters)	R0IMD4.1 PF01061.22;ABC2_membrane;
A06	BjuA022168	6612249	6612827	579	G1/G2	kunitz trypsin inhibitor 2-like [Brassica napus]	KTI2	Kunitz trypsin inhibitor 2 OS=Arabidopsis thaliana GN=KTI2 PE=2 SV=1	GO:0004866(endopeptidase inhibitor activity);GO:0005576(extracellular region);GO:0005618(cell wall);GO:0048046(apoplast)	ENOG410YHN1(trypsin and protease inhibitor family protein Kunitz family protein)	-	-	-	-	M4EAY3.1 PF00197.16;Kunitz_legume;
A06	BjuA022169	6612911	6615046	1716	G1/G2	PREDICTED: probable zinc metallopeptidase EGY3, chloroplastic [Brassica rapa]	EGY3	Probable zinc metallopeptidase EGY3, chloroplastic OS=Arabidopsis thaliana GN=EGY3 PE=1 SV=1	GO:0005739(mitochondrion);GO:0006508(proteolysis);GO:0008237(metallopeptidase activity);GO:0009408(response to heat);GO:0009644(response to high light intensity);GO:0016021(integral component of membrane);GO:0031969(chloroplast membrane);GO:0042542(response to hydrogen peroxide)	COG0750(Membrane-associated zinc metalloprotease)	-	-	-	-	K9VMW6.1 PF02163.20;Peptidase_M50;
A06	BjuA022170	6615379	6618135	1395	G1/G2	hypothetical protein BRARA_F01259 [Brassica rapa]	GER2	Putative GDP-L-fucose synthase 2 OS=Arabidopsis thaliana GN=GER2 PE=1 SV=1	GO:0003824(catalytic activity);GO:0005737(cytoplasm);GO:0009226(nucleotide-sugar biosynthetic process);GO:0016491(oxidoreductase activity);GO:0016853(isomerase activity);GO:0042350(GDP-L-fucose biosynthetic process);GO:0042351('de novo' GDP-L-fucose biosynthetic process);GO:0050577(GDP-L-fucose synthase activity);GO:0050662(coenzyme binding);GO:0055114(oxidation-reduction process)	COG0451(Nad-dependent epimerase dehydratase)	K02377	GDP-L-fucose synthase	EC:1.1.1.271	brp00051(Fructose and mannose metabolism);brp00520(Amino sugar and nucleotide sugar metabolism)	A0A087HJI7.1 PF01370.19;Epimerase;
A06	BjuA022171	6619558	6625578	2514	G1/G2	BnaA06g12140D [Brassica napus]	HDG12	Homeobox-leucine zipper protein HDG12 OS=Arabidopsis thaliana GN=HDG12 PE=2 SV=1	GO:0005634(nucleus);GO:0007275(multicellular organism development);GO:0008483(transaminase activity);GO:0040008(regulation of growth);GO:0048507(meristem development)	ENOG41105G5(Plant mobile domain)	NA	NA	NA	NA(NA)	A0A078DJM0.1 PF10536.7;PMD;
A06	BjuA022172	6632383	6634660	1215	G1/G2	PREDICTED: uncharacterized protein LOC103872572 isoform X1 [Brassica rapa]	-	-	GO:0003674(molecular_function);GO:0005634(nucleus)	ENOG410ZJRH(BRO1-like domain)	-	-	-	-	M4EAX7.1 PF03097.16;BRO1;
A06	BjuA022173	6639772	6644877	1047	G1/G2	receptor like protein 30-like [Brassica napus]	RLP30	Receptor like protein 30 OS=Arabidopsis thaliana GN=RLP30 PE=2 SV=1	GO:0002237(response to molecule of bacterial origin);GO:0002238(response to molecule of fungal origin);GO:0002240(response to molecule of oomycetes origin);GO:0005886(plasma membrane);GO:0006952(defense response);GO:0007165(signal transduction);GO:0009620(response to fungus);GO:0010204(defense response signaling pathway, resistance gene-independent);GO:0016021(integral component of membrane);GO:0…	COG4886(leucine Rich Repeat)	K20718	LRR receptor-like serine/threonine-protein kinase ERECTA	EC:2.7.11.1	csat04016(MAPK signaling pathway - plant)	A0A078JWL1.1 PF13855.4;LRR_8;
A06	BjuA022174	6647006	6648962	750	G1/G2	probable protein phosphatase 2C 8 [Brassica napus]	At1g18030	Probable protein phosphatase 2C 8 OS=Arabidopsis thaliana GN=At1g18030 PE=2 SV=2	GO:0004722(protein serine/threonine phosphatase activity);GO:0005737(cytoplasm);GO:0006470(protein dephosphorylation);GO:0046872(metal ion binding)	COG0631(Phosphatase)	NA	NA	NA	NA(NA)	V4KUM6.1 PF00481.19;PP2C;
A06	BjuA022175	6661576	6662304	486	G1/G2	unnamed protein product [Brassica rapa]	-	-	-	COG4886(leucine Rich Repeat)	-	-	-	-	-
A06	BjuA022176	6669221	6671731	2310	G1/G2	unnamed protein product [Brassica rapa]	RLP30	Receptor like protein 30 OS=Arabidopsis thaliana GN=RLP30 PE=2 SV=1	GO:0005886(plasma membrane);GO:0006952(defense response);GO:0007165(signal transduction);GO:0016021(integral component of membrane);GO:0016301(kinase activity)	COG4886(leucine Rich Repeat)	K20718	LRR receptor-like serine/threonine-protein kinase ERECTA	EC:2.7.11.1	csat04016(MAPK signaling pathway - plant)	M4EAX5.1 PF08263.10;LRRNT_2;
A06	BjuA025138	30720044	30720829	786	G1/G3	hypothetical protein BRARA_F03848 [Brassica rapa]	ERF060	Ethylene-responsive transcription factor ERF060 OS=Arabidopsis thaliana GN=ERF060 PE=2 SV=1	GO:0003677(DNA binding);GO:0003700(DNA binding transcription factor activity);GO:0005634(nucleus);GO:0006351(transcription, DNA-templated);GO:0006355(regulation of transcription, DNA-templated);GO:0009873(ethylene-activated signaling pathway)	ENOG410YGN6(Transcription factor)	NA	NA	NA	NA(NA)	C5YKT7.1 PF00847.18;AP2;
A06	BjuA025139	30729509	30730162	654	G1/G3	hypothetical protein BRARA_F03849 [Brassica rapa]	-	-	-	-	-	-	-	-	-
A06	BjuA025140	30741595	30742767	1173	G1/G3	uncharacterized protein LOC106392595 [Brassica napus]	-	-	GO:0003676(nucleic acid binding);GO:0003723(RNA binding);GO:0003964(RNA-directed DNA polymerase activity);GO:0005739(mitochondrion);GO:0006278(RNA-dependent DNA biosynthetic process)	ENOG410Y65V(Retrotransposon protein)	K00430	peroxidase	EC:1.11.1.7	bna00940(Phenylpropanoid biosynthesis)	A0A078I6W3.1 PF13966.4;zf-RVT;
A06	BjuA025141	30757616	30760328	1113	G1/G3	PREDICTED: probable trehalose-phosphate phosphatase H isoform X2 [Brassica rapa]	TPPH	Probable trehalose-phosphate phosphatase H OS=Arabidopsis thaliana GN=TPPH PE=2 SV=1	GO:0004805(trehalose-phosphatase activity);GO:0005634(nucleus);GO:0005737(cytoplasm);GO:0005829(cytosol);GO:0005992(trehalose biosynthetic process)	COG1877(trehalose biosynthetic process)	K01087	trehalose 6-phosphate phosphatase	EC:3.1.3.12	brp00500(Starch and sucrose metabolism)	M4D5S8.1 PF02358.14;Trehalose_PPase;
A06	BjuA025142	30798695	30800192	1026	G1/G3	unnamed protein product [Brassica rapa]	-	-	-	-	-	-	-	-	-
A06	BjuA025143	30811781	30814229	1743	G1/G3	unnamed protein product [Brassica rapa]	GGT2	Gamma-glutamyltranspeptidase 2 OS=Arabidopsis thaliana GN=GGT2 PE=2 SV=1	GO:0005576(extracellular region);GO:0005886(plasma membrane);GO:0006751(glutathione catabolic process);GO:0016756(glutathione gamma-glutamylcysteinyltransferase activity);GO:0034775(glutathione transmembrane transport);GO:0036374(glutathione hydrolase activity);GO:0048046(apoplast);GO:0102953(hypoglycin A gamma-glutamyl transpeptidase activity)	COG0405(gamma-glutamyltransferase activity)	K18592	gamma-glutamyltranspeptidase / glutathione hydrolase / leukotriene-C4 hydrolase	EC:2.3.2.2 3.4.19.13 3.4.19.14	brp00590(Arachidonic acid metabolism);brp00430(Taurine and hypotaurine metabolism);brp00460(Cyanoamino acid metabolism);brp00480(Glutathione metabolism)	A0A0D3DIA8.1 PF01019.19;G_glu_transpept;
A06	BjuA025144	30826450	30845320	1176	G1/G3	unnamed protein product [Brassica rapa]	NPSN13	Novel plant SNARE 13 OS=Arabidopsis thaliana GN=NPSN13 PE=1 SV=1	GO:0000149(SNARE binding);GO:0005484(SNAP receptor activity);GO:0005789(endoplasmic reticulum membrane);GO:0005794(Golgi apparatus);GO:0005886(plasma membrane);GO:0006623(protein targeting to vacuole);GO:0006888(ER to Golgi vesicle-mediated transport);GO:0006891(intra-Golgi vesicle-mediated transport);GO:0006896(Golgi to vacuole transport);GO:0009507(chloroplast);GO:0012507(ER to Golgi transport …	COG0507(exodeoxyribonuclease v alpha)	K07466	replication factor A1	-	brp03030(DNA replication);brp03420(Nucleotide excision repair);brp03430(Mismatch repair);brp03440(Homologous recombination)	A0A078GB44.1 PF08646.8;Rep_fac-A_C;
A06	BjuA043132	10320421	10323811	1164	G1/G2	PREDICTED: N-glycosylase/DNA lyase OGG1 [Brassica rapa]	OGG1	N-glycosylase/DNA lyase OGG1 OS=Arabidopsis thaliana GN=OGG1 PE=1 SV=1	GO:0003684(damaged DNA binding);GO:0005634(nucleus);GO:0006281(DNA repair);GO:0006284(base-excision repair);GO:0006289(nucleotide-excision repair);GO:0008534(oxidized purine nucleobase lesion DNA N-glycosylase activity);GO:0140078(class I DNA-(apurinic or apyrimidinic site) lyase activity);GO:0140080(class III/IV DNA-(apurinic or apyrimidinic site) lyase activity)	COG0122(Glycosylase)	K03660	N-glycosylase/DNA lyase	EC:3.2.2.- 4.2.99.18	brp03410(Base excision repair)	A0A078ETX5.1 PF00730.23;HhH-GPD;
A06	BjuA043133	10323899	10326452	1143	G1/G2	unnamed protein product, partial [Brassica rapa]	PBC1	Proteasome subunit beta type-3-A OS=Arabidopsis thaliana GN=PBC1 PE=1 SV=2	GO:0000502(proteasome complex);GO:0004298(threonine-type endopeptidase activity);GO:0005634(nucleus);GO:0005737(cytoplasm);GO:0005774(vacuolar membrane);GO:0005829(cytosol);GO:0005839(proteasome core complex);GO:0006511(ubiquitin-dependent protein catabolic process);GO:0008233(peptidase activity);GO:0043161(proteasome-mediated ubiquitin-dependent protein catabolic process)	ENOG410XSC8(The proteasome is a multicatalytic proteinase complex which is characterized by its ability to cleave peptides with Arg, Phe, Tyr, Leu, and Glu adjacent to the leaving group at neutral or slightly basic pH. The proteasome has an ATP-dependent proteolytic activity (By similarity))	K02735	20S proteasome subunit beta 3	EC:3.4.25.1	brp03050(Proteasome)	A0A067K9D6.1 PF00227.24;Proteasome;
A06	BjuA043134	10346602	10349684	2751	G1/G2	PREDICTED: uncharacterized protein LOC103873018 [Brassica rapa]	-	-	GO:0005634(nucleus)	ENOG410YB6H(Protein of unknown function (DUF632))	-	-	-	-	A0A078EUM6.1 PF04782.10;DUF632;
A06	BjuA043135	10350205	10352750	1494	G1/G2	PREDICTED: protein disulfide isomerase-like 1-1 [Brassica rapa]	PDIL1-1	Protein disulfide isomerase-like 1-1 OS=Arabidopsis thaliana GN=PDIL1-1 PE=1 SV=1	GO:0000326(protein storage vacuole);GO:0000327(lytic vacuole within protein storage vacuole);GO:0003756(protein disulfide isomerase activity);GO:0005515(protein binding);GO:0005773(vacuole);GO:0005783(endoplasmic reticulum);GO:0005788(endoplasmic reticulum lumen);GO:0005794(Golgi apparatus);GO:0006457(protein folding);GO:0009505(plant-type cell wall);GO:0009507(chloroplast);GO:0009579(thylakoid);…	COG0526(Thioredoxin)	K09580	protein disulfide-isomerase A1	EC:5.3.4.1	brp04141(Protein processing in endoplasmic reticulum)	A0A078F495.1 PF13848.4;Thioredoxin_6;
A06	BjuA043136	10361574	10363512	1005	G1/G2	hypothetical protein BRARA_F01586 [Brassica rapa]	SKIP32	F-box protein 7 OS=Arabidopsis thaliana GN=SKIP32 PE=1 SV=1	GO:0003674(molecular_function);GO:0005634(nucleus);GO:0005737(cytoplasm);GO:0005739(mitochondrion);GO:0006417(regulation of translation);GO:0009408(response to heat);GO:0009409(response to cold);GO:0016567(protein ubiquitination);GO:0090406(pollen tube)	ENOG410XPVI(F-box protein)	NA	NA	NA	NA(NA)	D7KKU2.1 PF12937.5;F-box-like;
A06	BjuA043137	10365997	10367200	978	G1/G2	BTB/POZ domain-containing protein At1g21780 [Brassica napus]	At1g21780	BTB/POZ domain-containing protein At1g21780 OS=Arabidopsis thaliana GN=At1g21780 PE=1 SV=1	GO:0005515(protein binding);GO:0005737(cytoplasm);GO:0031463(Cul3-RING ubiquitin ligase complex);GO:0043161(proteasome-mediated ubiquitin-dependent protein catabolic process)	ENOG410XQV8(meprin and TRAF homology domain-containing protein MATH domain-containing protein)	NA	NA	NA	NA(NA)	M4DN64.1 PF00651.29;BTB;
A06	BjuA043138	10369191	10370098	840	G1/G2	TLC domain-containing protein 2 [Brassica napus]	TLCD2	TLC domain-containing protein 2 OS=Homo sapiens GN=TLCD2 PE=3 SV=3	GO:0003674(molecular_function);GO:0005739(mitochondrion);GO:0008150(biological_process)	ENOG410Z5I9(TLC domain containing)	K01872	alanyl-tRNA synthetase	EC:6.1.1.7	aly00970(Aminoacyl-tRNA biosynthesis)	D7KKU5.1 PF03798.14;TRAM_LAG1_CLN8;
A06	BjuA043139	10373359	10374282	612	G1/G2	uncharacterized protein LOC106347390 [Brassica napus]	-	-	GO:0003674(molecular_function);GO:0005634(nucleus);GO:0008150(biological_process)	ENOG410YK28(NA)	-	-	-	-	A0A0D3CC77.1 PF05340.10;DUF740;
A06	BjuA043140	10398678	10400278	1242	G1/G2	BnaA06g15560D [Brassica napus]	LYM1	LysM domain-containing GPI-anchored protein 1 OS=Arabidopsis thaliana GN=LYM1 PE=1 SV=1	GO:0005576(extracellular region);GO:0005886(plasma membrane);GO:0006952(defense response);GO:0006955(immune response);GO:0016998(cell wall macromolecule catabolic process);GO:0031225(anchored component of membrane);GO:0042834(peptidoglycan binding);GO:0046658(anchored component of plasma membrane)	ENOG410YAMN(lysM domain-containing GPI-anchored protein)	-	-	-	-	A0A078F121.1 PF01476.18;LysM;
A06	BjuA043141	10404606	10405693	564	G1/G2	PREDICTED: transmembrane emp24 domain-containing protein p24delta5 [Brassica oleracea var. oleracea]	At1g21900	Transmembrane emp24 domain-containing protein p24delta5 OS=Arabidopsis thaliana GN=At1g21900 PE=1 SV=1	GO:0005576(extracellular region);GO:0005783(endoplasmic reticulum);GO:0005789(endoplasmic reticulum membrane);GO:0005801(cis-Golgi network);GO:0006886(intracellular protein transport);GO:0006888(ER to Golgi vesicle-mediated transport);GO:0008320(protein transmembrane transporter activity);GO:0015031(protein transport);GO:0016020(membrane);GO:0016021(integral component of membrane);GO:0016192(vesi…	ENOG410XTBQ(vesicle-mediated transport)	NA	NA	NA	NA(NA)	A0A078ETY6.1 PF01105.22;EMP24_GP25L;
A06	BjuA043142	10406870	10408765	1896	G1/G2	pentatricopeptide repeat-containing protein At3g49730-like [Brassica napus]	At3g49730	Pentatricopeptide repeat-containing protein At3g49730 OS=Arabidopsis thaliana GN=At3g49730 PE=2 SV=1	GO:0005739(mitochondrion);GO:0009451(RNA modification)	ENOG410Z7Z7(Pentatricopeptide repeat-containing protein)	-	-	-	-	A0A078F4Y8.1 PF17177.2;PPR_long;
A06	BjuA043143	10409709	10412478	1725	G1/G2	pentatricopeptide repeat-containing protein At3g49730-like [Brassica napus]	At3g49725	GTP-binding protein At3g49725, chloroplastic OS=Arabidopsis thaliana GN=At3g49725 PE=2 SV=2	GO:0005525(GTP binding);GO:0005737(cytoplasm);GO:0009507(chloroplast);GO:0046872(metal ion binding)	COG2262(GTPase that associates with the 50S ribosomal subunit and may have a role during protein synthesis or ribosome biogenesis (By similarity))	NA	NA	NA	NA(NA)	A0A078F491.1 PF01926.21;MMR_HSR1;
A06	BjuA043144	10413855	10415157	783	G1/G2	unnamed protein product [Brassica oleracea]	At3g49720	Uncharacterized protein At3g49720 OS=Arabidopsis thaliana GN=At3g49720 PE=2 SV=1	GO:0003674(molecular_function);GO:0005768(endosome);GO:0005774(vacuolar membrane);GO:0005794(Golgi apparatus);GO:0005802(trans-Golgi network);GO:0005886(plasma membrane);GO:0009535(chloroplast thylakoid membrane);GO:0016020(membrane);GO:0016021(integral component of membrane);GO:0040007(growth);GO:0045489(pectin biosynthetic process)	ENOG4111QN3(NA)	K01188	beta-glucosidase	EC:3.2.1.21	cic00500(Starch and sucrose metabolism);cic00460(Cyanoamino acid metabolism);cic00940(Phenylpropanoid biosynthesis)	A0A061DHV3.1 PF07021.10;MetW;
A06	BjuA043145	10426177	10427850	1413	G1/G2	BnaA06g15630D [Brassica napus]	ACS9	1-aminocyclopropane-1-carboxylate synthase 9 OS=Arabidopsis thaliana GN=ACS9 PE=1 SV=1	GO:0005515(protein binding);GO:0005737(cytoplasm);GO:0006417(regulation of translation);GO:0009693(ethylene biosynthetic process);GO:0009835(fruit ripening);GO:0016847(1-aminocyclopropane-1-carboxylate synthase activity);GO:0030170(pyridoxal phosphate binding);GO:0071281(cellular response to iron ion)	COG0436(aminotransferase)	K01762	1-aminocyclopropane-1-carboxylate synthase	EC:4.4.1.14	bna00270(Cysteine and methionine metabolism)	A0A0D3DRN8.1 PF00155.19;Aminotran_1_2;
A06	BjuA043146	10437248	10438463	900	G1/G2	hypothetical protein BRARA_F01573 [Brassica rapa]	RAX3	Transcription factor RAX3 OS=Arabidopsis thaliana GN=RAX3 PE=2 SV=1	GO:0000981(RNA polymerase II transcription factor activity, sequence-specific DNA binding);GO:0001135(transcription factor activity, RNA polymerase II transcription factor recruiting);GO:0003677(DNA binding);GO:0003700(DNA binding transcription factor activity);GO:0005634(nucleus);GO:0006351(transcription, DNA-templated);GO:0006355(regulation of transcription, DNA-templated);GO:0006357(regulation…	COG5147(Myblike DNAbinding domain containing protein)	NA	NA	NA	NA(NA)	M4DN76.1 PF00249.29;Myb_DNA-binding;
A06	BjuA046183	292181	293825	1047	G1/G2	PREDICTED: epithiospecifier protein-like [Brassica rapa]	ESP	Epithiospecifier protein OS=Arabidopsis thaliana GN=ESP PE=1 SV=2	GO:0005515(protein binding);GO:0005634(nucleus);GO:0005737(cytoplasm);GO:0009753(response to jasmonic acid);GO:0010150(leaf senescence);GO:0019762(glucosinolate catabolic process);GO:0030234(enzyme regulator activity);GO:0042742(defense response to bacterium)	ENOG410Y5WM(Kelch domain containing)	NA	NA	NA	NA(NA)	A0A078GHH4.1 PF13964.4;Kelch_6;
A06	BjuA046184	300989	302671	1128	G1/G2	PREDICTED: LOW QUALITY PROTEIN: GDSL esterase/lipase 1-like [Brassica rapa]	GLIP1	GDSL esterase/lipase 1 OS=Arabidopsis thaliana GN=GLIP1 PE=1 SV=1	GO:0005576(extracellular region);GO:0005615(extracellular space);GO:0009620(response to fungus);GO:0009627(systemic acquired resistance);GO:0009751(response to salicylic acid);GO:0009817(defense response to fungus, incompatible interaction);GO:0009866(induced systemic resistance, ethylene mediated signaling pathway);GO:0009871(jasmonic acid and ethylene-dependent systemic resistance, ethylene med…	-	K21026	acetylajmaline esterase	EC:3.1.1.80	brp00901(Indole alkaloid biosynthesis)	A0A078GFG6.1 PF00657.20;Lipase_GDSL;
A06	BjuA046185	303570	306105	942	G1/G2	hypothetical protein BRARA_F00082, partial [Brassica rapa]	-	Ubiquitin-60S ribosomal protein L40 OS=Trypanosoma cruzi PE=2 SV=1	GO:0005622(intracellular);GO:0005634(nucleus);GO:0005737(cytoplasm);GO:0006464(cellular protein modification process);GO:0006511(ubiquitin-dependent protein catabolic process)	COG5272(ubiquitin)	NA	NA	NA	NA(NA)	I7M8I7.1 PF00240.21;ubiquitin;
A06	BjuA046186	307502	307984	483	G1/G2	hypothetical protein BRARA_F00084 [Brassica rapa]	UBI1	Ubiquitin-60S ribosomal protein L40 OS=Chlamydomonas reinhardtii GN=UBI1 PE=1 SV=1	GO:0005622(intracellular);GO:0006464(cellular protein modification process);GO:0006511(ubiquitin-dependent protein catabolic process)	COG5272(ubiquitin)	NA	NA	NA	NA(NA)	I1I505.1 PF00240.21;ubiquitin;
A06	BjuA046187	311548	313773	1149	G1/G2	PREDICTED: translation initiation factor eIF-2B subunit alpha [Brassica rapa]	eif2b1	Translation initiation factor eIF-2B subunit alpha OS=Dictyostelium discoideum GN=eif2b1 PE=3 SV=1	GO:0003743(translation initiation factor activity);GO:0005525(GTP binding);GO:0005851(eukaryotic translation initiation factor 2B complex);GO:0006413(translational initiation)	COG1184(translation initiation factor)	K03239	translation initiation factor eIF-2B subunit alpha	-	brp03013(RNA transport)	A0A0D3CQT4.1 PF01008.15;IF-2B;
A06	BjuA046188	322100	322702	522	G1/G2	unnamed protein product [Brassica oleracea]	At1g53870	Protein LURP-one-related 2 OS=Arabidopsis thaliana GN=At1g53870 PE=2 SV=2	GO:0003674(molecular_function);GO:0008150(biological_process);GO:0009507(chloroplast)	-	K03239	translation initiation factor eIF-2B subunit alpha	-	brp03013(RNA transport)	M4FF26.1 PF04525.10;LOR;
A06	BjuA046189	325554	326159	606	G1/G2	hypothetical protein BRARA_F00088 [Brassica rapa]	At1g53870	Protein LURP-one-related 2 OS=Arabidopsis thaliana GN=At1g53870 PE=2 SV=2	GO:0003674(molecular_function);GO:0008150(biological_process);GO:0009507(chloroplast)	ENOG410YJE2(LURP-one-related)	K03239	translation initiation factor eIF-2B subunit alpha	-	brp03013(RNA transport)	M4FF26.1 PF04525.10;LOR;
A06	BjuA046190	328166	333069	1932	G1/G2	BnaC06g06620D [Brassica napus]	PAE1	Proteasome subunit alpha type-5-A OS=Arabidopsis thaliana GN=PAE1 PE=1 SV=1	GO:0003677(DNA binding);GO:0005575(cellular_component);GO:0008150(biological_process)	COG0638(The proteasome is a multicatalytic proteinase complex which is characterized by its ability to cleave peptides with Arg, Phe, Tyr, Leu, and Glu adjacent to the leaving group at neutral or slightly basic pH. The proteasome has an ATP-dependent proteolytic activity (By similarity))	K02729	20S proteasome subunit alpha 5	EC:3.4.25.1	bna03050(Proteasome)	A0A061GJW6.1 PF00227.24;Proteasome;
A06	BjuA046191	333710	336624	1761	G1/G2	pectinesterase 1-like [Brassica napus]	PME1	Pectinesterase 1 OS=Arabidopsis thaliana GN=PME1 PE=1 SV=1	GO:0000139(Golgi membrane);GO:0005515(protein binding);GO:0005576(extracellular region);GO:0005618(cell wall);GO:0005634(nucleus);GO:0005768(endosome);GO:0005774(vacuolar membrane);GO:0005794(Golgi apparatus);GO:0005802(trans-Golgi network);GO:0005886(plasma membrane);GO:0009505(plant-type cell wall);GO:0009506(plasmodesma);GO:0016020(membrane);GO:0030599(pectinesterase activity);GO:0042545(cell …	COG4677(pectinesterase)	K01051	pectinesterase	EC:3.1.1.11	rcu00040(Pentose and glucuronate interconversions)	M4FF22.1 PF01095.17;Pectinesterase;
A06	BjuA046192	338031	340003	1014	G1/G2	BnaA06g00700D [Brassica napus]	MEKK1	Mitogen-activated protein kinase kinase kinase 1 OS=Arabidopsis thaliana GN=MEKK1 PE=1 SV=2	GO:0000165(MAPK cascade);GO:0003677(DNA binding);GO:0004674(protein serine/threonine kinase activity);GO:0004709(MAP kinase kinase kinase activity);GO:0005515(protein binding);GO:0005524(ATP binding);GO:0005634(nucleus);GO:0005768(endosome);GO:0005886(plasma membrane);GO:0006970(response to osmotic stress);GO:0007346(regulation of mitotic cell cycle);GO:0009409(response to cold);GO:0009611(respon…	ENOG410XQGS(mitogen-activated protein kinase kinase kinase)	K13414	mitogen-activated protein kinase kinase kinase 1	EC:2.7.11.25	bna04016(MAPK signaling pathway - plant);bna04626(Plant-pathogen interaction)	A0A078HFN0.1 PF00069.23;Pkinase;
A06	BjuA046193	340656	343753	1650	G1/G2	PREDICTED: uncharacterized protein LOC103871109 isoform X1 [Brassica rapa]	-	-	GO:0005886(plasma membrane);GO:0008150(biological_process)	ENOG410Y4AY(NA)	K05857	phosphatidylinositol phospholipase C, delta	EC:3.1.4.11	aip00562(Inositol phosphate metabolism);aip04070(Phosphatidylinositol signaling system);aip04933(AGE-RAGE signaling pathway in diabetic complications)	M4FF20.1 PF07460.9;NUMOD3;
A06	BjuA046194	343911	345724	1629	G1/G2	unnamed protein product [Brassica rapa]	-	-	GO:0046922(peptide-O-fucosyltransferase activity)	ENOG410YQA9(GDP-fucose protein O-fucosyltransferase)	K03691	peptide-O-fucosyltransferase	EC:2.4.1.221	bna00514(Other types of O-glycan biosynthesis)	M4FF19.1 PF10250.7;O-FucT;
A06	BjuA046195	347134	352286	1362	G1/G2	hypothetical protein DVH24_000541 [Malus domestica]	RPT1A	26S protease regulatory subunit 7 homolog A OS=Arabidopsis thaliana GN=RPT1A PE=1 SV=1	GO:0003674(molecular_function);GO:0005739(mitochondrion);GO:0005774(vacuolar membrane);GO:0008150(biological_process);GO:0009536(plastid);GO:0016020(membrane);GO:0016021(integral component of membrane)	ENOG4111G7K(conserved hypothetical protein)	K03061	26S proteasome regulatory subunit T1	-	bna03050(Proteasome)	A0A078GC81.1 PF10173.7;Mit_KHE1;
A06	BjuA046196	352570	357657	2253	G1/G2	PREDICTED: protein STRUBBELIG-RECEPTOR FAMILY 6-like [Raphanus sativus]	SRF6	Protein STRUBBELIG-RECEPTOR FAMILY 6 OS=Arabidopsis thaliana GN=SRF6 PE=1 SV=1	GO:0004672(protein kinase activity);GO:0004674(protein serine/threonine kinase activity);GO:0004675(transmembrane receptor protein serine/threonine kinase activity);GO:0005524(ATP binding);GO:0005576(extracellular region);GO:0005886(plasma membrane);GO:0006468(protein phosphorylation);GO:0007166(cell surface receptor signaling pathway);GO:0007169(transmembrane receptor protein tyrosine kinase sig…	ENOG410XUXK(strubbelig-receptor family)	NA	NA	NA	NA(NA)	A0A0D3CQR9.1 PF07714.15;Pkinase_Tyr;
A07	BjuA001421	11050551	11056408	3366	G1/G2	PREDICTED: DNA mismatch repair protein MSH1, mitochondrial [Brassica rapa]	MSH1	DNA mismatch repair protein MSH1, mitochondrial OS=Arabidopsis thaliana GN=MSH1 PE=1 SV=1	GO:0000002(mitochondrial genome maintenance);GO:0000404(heteroduplex DNA loop binding);GO:0003677(DNA binding);GO:0003684(damaged DNA binding);GO:0005524(ATP binding);GO:0005634(nucleus);GO:0005739(mitochondrion);GO:0006298(mismatch repair);GO:0008094(DNA-dependent ATPase activity);GO:0009408(response to heat);GO:0009507(chloroplast);GO:0009536(plastid);GO:0030983(mismatched DNA binding);GO:00320…	COG0249(that it carries out the mismatch recognition step. This protein has a weak ATPase activity (By similarity))	K08737	DNA mismatch repair protein MSH6	-	csat03430(Mismatch repair)	D7L521.1 PF00488.19;MutS_V;
A07	BjuA001422	11058522	11060197	867	G1/G2	unnamed protein product [Brassica rapa]	-	-	GO:0003674(molecular_function);GO:0005737(cytoplasm)	ENOG4111K1Q(Sec20)	K08497	protein transport protein SEC20	-	brp04130(SNARE interactions in vesicular transport)	A0A078E099.1 PF03908.11;Sec20;
A07	BjuA001423	11061493	11062030	240	G1/G2	PREDICTED: glutamyl-tRNA(Gln) amidotransferase subunit B, chloroplastic/mitochondrial isoform X1 [Brassica oleracea var. oleracea]	GATB	Glutamyl-tRNA(Gln) amidotransferase subunit B, chloroplastic/mitochondrial OS=Arabidopsis thaliana GN=GATB PE=2 SV=1	GO:0005524(ATP binding);GO:0005739(mitochondrion);GO:0006424(glutamyl-tRNA aminoacylation);GO:0009507(chloroplast);GO:0009570(chloroplast stroma);GO:0032543(mitochondrial translation);GO:0050567(glutaminyl-tRNA synthase (glutamine-hydrolyzing) activity);GO:0070681(glutaminyl-tRNAGln biosynthesis via transamidation)	COG0064(Allows the formation of correctly charged Asn-tRNA(Asn) or Gln-tRNA(Gln) through the transamidation of misacylated Asp- tRNA(Asn) or Glu-tRNA(Gln) in organisms which lack either or both of asparaginyl-tRNA or glutaminyl-tRNA synthetases. The reaction takes place in the presence of glutamine and ATP through an activated phospho-Asp-tRNA(Asn) or phospho-Glu-tRNA(Gln) (By similarity))	K02434	aspartyl-tRNA(Asn)/glutamyl-tRNA(Gln) amidotransferase subunit B	EC:6.3.5.6 6.3.5.7	bna00970(Aminoacyl-tRNA biosynthesis)	M4CCL2.1 PF02637.16;GatB_Yqey;
A07	BjuA001424	11086480	11086830	351	G1/G2	-	-	-	-	-	-	-	-	-	-
A07	BjuA001425	11106683	11108197	1515	G1/G2	PREDICTED: ammonium transporter 1 member 3 [Brassica rapa]	AMT1-3	Ammonium transporter 1 member 3 OS=Arabidopsis thaliana GN=AMT1-3 PE=2 SV=2	GO:0005886(plasma membrane);GO:0005887(integral component of plasma membrane);GO:0006810(transport);GO:0008519(ammonium transmembrane transporter activity);GO:0010311(lateral root formation);GO:0015695(organic cation transport);GO:0015696(ammonium transport);GO:0016020(membrane);GO:0072488(ammonium transmembrane transport);GO:0080181(lateral root branching)	COG0004(ammonium Transporter)	NA	NA	NA	NA(NA)	M4EHV3.1 PF00909.19;Ammonium_transp;
A07	BjuA025217	1388972	1390094	1053	G1/G2	uncharacterized protein LOC111201676, partial [Brassica napus]	-	Retrovirus-related Pol polyprotein from transposon TNT 1-94 OS=Nicotiana tabacum PE=2 SV=1	-	COG2801(Retrotransposon protein)	K01886	glutaminyl-tRNA synthetase	EC:6.1.1.18	pda00970(Aminoacyl-tRNA biosynthesis)	A0A0D2ZV94.1 PF13976.4;gag_pre-integrs;
A07	BjuA025218	1372141	1373205	1065	G1/G2	PREDICTED: zinc finger CCCH domain-containing protein 20 [Brassica rapa]	At2g19810	Zinc finger CCCH domain-containing protein 20 OS=Arabidopsis thaliana GN=At2g19810 PE=2 SV=1	GO:0003676(nucleic acid binding);GO:0003677(DNA binding);GO:0003700(DNA binding transcription factor activity);GO:0005634(nucleus);GO:0005886(plasma membrane);GO:0006355(regulation of transcription, DNA-templated);GO:0006979(response to oxidative stress);GO:0046872(metal ion binding)	ENOG410XR0Z(zinc finger CCCH domain-containing protein)	-	-	-	-	A0A0J8D1N5.1 PF10477.7;EIF4E-T;
A07	BjuA025219	1356657	1357728	633	G1/G2	PREDICTED: vacuolar protein sorting-associated protein 32 homolog 1 [Brassica rapa]	VPS32.1	Vacuolar protein sorting-associated protein 32 homolog 1 OS=Arabidopsis thaliana GN=VPS32.1 PE=1 SV=1	GO:0000815(ESCRT III complex);GO:0005515(protein binding);GO:0005737(cytoplasm);GO:0005886(plasma membrane);GO:0007034(vacuolar transport);GO:0015031(protein transport);GO:0016192(vesicle-mediated transport)	ENOG410YE9I(Charged multivesicular body protein)	K12194	charged multivesicular body protein 4	-	brp04144(Endocytosis)	A0A078HDJ6.1 PF03357.19;Snf7;
A07	BjuA025220	1351054	1351908	855	G1/G2	PREDICTED: uncharacterized protein LOC108845678 [Raphanus sativus]	-	-	-	ENOG410Y65V(Retrotransposon protein)	-	-	-	-	A0A0D3AVF0.1 PF13966.4;zf-RVT;
A07	BjuA025221	1347330	1347935	606	G1/G2	BnaA07g00940D [Brassica napus]	-	-	-	-	-	-	-	-	-
[truncated: 2,641 more rows]

## Sheet: Table S5
Table S5. Genes significantly associated with seed coat color in Brassica juncea.
Chr.	SNP name	Position (bp)	SNP area	p-value	B. juncea gene ID	Start position	End position	B. napusgene ID	Selective sweep			Protein functional description	Annotation
									Groups	Fst	Pi
A09	A09_27360307	27360307	exon	1.5e-09	BjuA034936	27359538	27361184	BnaAnng02100D	G4/ G1,G4/G2	0.350394	1.82468	Protein TRANSPARENT TESTA 1	GO:0003676(nucleic acid binding);GO:0003700(DNA binding transcription factor activity);GO:0005634(nucleus);GO:0006351(transcription, DNA-templated);GO:0006355(regulation of transcription, DNA-templated);GO:0009813(flavonoid biosynthetic process);GO:0046872(metal ion binding)
[truncated: 1 more rows]

## Sheet: Table S6
Table S5: Phenotypic characteristics for fatty acid compositiont in the 193 Brassica juncea accessions.
[truncated: 5 more rows]

[truncated: 3 more sheets: Table S7, Table S8, Table S9]
